# Supplementary material for: Vapor Cannabis Exposure Promotes Genetic Plasticity in the Rat Hypothalamus
Source: Sci Rep. 2019 Nov 14;9:16866. doi: 10.1038/s41598-019-53516-4 (PMC6856070; doi:10.1038/s41598-019-53516-4)
Supplement: Supplementary file 1 — Dataset 1 [file 41598_2019_53516_MOESM1_ESM.xlsx]

## Sheet: Sheet1
New ID	chr	strand	coord	start	end	symbol	transcript	gene_id	gene_biotype	class_code	Control 4	Control 3	Control 1	Control 2	Cannabis 1	Cannabis 2	Cannabis 3	Cannabis 4	baseMean	log2FoldChange	lfcSE	stat	pvalue	padj
1	NC_001665.2	+	1101	31	5318	mt-Rnr1	rna70595	gene39501	rRNA	=	88488.6	79919.7	126291	99521.4	85284.6	63166	92880.2	77242.5	89099.2	-0.307387	0.285719	-1.07583	0.282001	0.999991
2	NC_001665.2	+	7695	5788	9612	Trnd	rna70608	gene39517	tRNA	=	42634.7	97683.1	76072	96428.1	56675.5	95786.9	94017.7	79281.7	79822.5	0.0584819	0.353686	0.16535	0.868668	0.999991
3	NC_005117.4	+	79437304	79437274	79437920	Mbp	rna63740	gene35028	protein_coding	o	41715.2	31581.7	43920.8	31554.5	37485.7	29995	24895.8	42829.9	35497.3	-0.137931	0.300132	-0.459568	0.645827	0.999991
4	NC_005100.4	-	80612892	80612861	80612922	Apoe	rna2091	gene1341	protein_coding	o	23253.7	19932.8	26898.8	25721	23126.5	22674.6	19809.4	23378.5	23099.4	-0.106489	0.249748	-0.426384	0.669828	0.999991
5	NC_001665.2	+	15284	12075	16477	CYTB	gene39534	gene39534	protein_coding	=	7141.53	17831.9	13217.7	13785.9	9980.53	18639.1	13042.3	13197.7	13354.6	0.0777854	0.359512	0.216364	0.828704	0.999991
6	NC_005102.4	-	143219670	143219654	143219704	Cst3	rna17480	gene9955	protein_coding	o	5348.2	13199.9	7479.12	9804.3	11257.1	17412.8	10772.1	16616.4	11486.3	0.645583	0.361635	1.78518	0.0742325	0.999991
7	NC_005120.4	-	17176140	17176135	17176151	Nudt11	rna67918	gene37422	protein_coding	i	28949.4	10883.5	14679	11038.5	15449.5	4349.72	8397.67	12918.9	13333.3	-0.672864	0.461247	-1.45879	0.144622	0.999991
8	NC_001665.2	-	15346	14771	16185	Trnp	rna70617	gene39536	tRNA	=	11272.3	10590.1	13812.7	11886.1	13436.5	11359.9	11658.7	9919.62	11742	-0.0365136	0.255271	-0.143039	0.88626	0.999991
9	NC_005112.4	+	41826452	41826430	41826933	LOC100362110	rna51009	gene27952	protein_coding	i	11572.2	10835.8	9925.87	14016.9	14900.6	5736.08	11299.6	11988	11284.4	-0.0776127	0.346258	-0.224147	0.822643	0.999991
10	NC_005102.4	+	154046334	154046252	154046735	Nnat	rna18032	gene10236	protein_coding	o	11476.9	10058.4	10815.5	10674.6	9009.42	11597.7	9979.98	9968.01	10447.6	-0.0852065	0.240412	-0.354419	0.723025	0.999991
11	NC_005101.4	+	217328937	217328933	217329471	-	-	-	-	u	19184.4	8527.55	13713.3	11038.5	13386.8	4538.38	9265.58	8324.34	10997.4	-0.562872	0.399178	-1.41008	0.158517	0.999991
12	NC_005113.4	-	43133220	43133199	43133284	Uchl1	rna54146	gene29575	protein_coding	o	12612.9	6755.03	8599.79	11793.9	12672.8	10703.6	10306.7	9487.96	10366.6	0.118841	0.305558	0.388932	0.697327	0.999991
13	NC_005102.4	-	176808014	176808001	176808040	Stmn3	rna18858	gene10657	protein_coding	o	9848.4	6413.96	5700.54	7197	12007.2	7623.31	6483.74	6808.17	7760.29	0.175218	0.330959	0.529423	0.596512	0.999991
14	NC_005100.4	+	264072437	264072368	264073000	Scd2	rna8544	gene4728	protein_coding	o	4984.77	6995.4	6865.06	7252.07	5994.28	8282.94	7494.33	7288.98	6894.73	0.155031	0.2709	0.572279	0.567133	0.999991
15	NC_005111.4	+	11839638	11839603	11840538	Tmem130	rna49190	gene26951	protein_coding	o	6295.51	6055.43	5280.93	5687.45	3302.01	5815.79	6622.49	7222.16	5785.22	-0.0220836	0.317935	-0.0694595	0.944624	0.999991
16	NC_005113.4	+	7025312	7025183	7025817	Sparcl1	rna53399	gene29149	protein_coding	o	3950.08	5185.28	5234.14	7139.54	3881.94	6798.93	7147.96	6323.52	5707.67	0.167187	0.325197	0.514108	0.607176	0.999991
17	NC_005108.4	-	82470792	82470766	82470826	Resp18	rna40800	gene22544	protein_coding	o	5034.42	5657.28	5403.74	5967.58	5608.07	6463.47	6071.43	5687.56	5736.69	0.111129	0.235826	0.471235	0.637473	0.999991
18	NC_005102.4	+	172434989	172434795	172435456	Gnas	rna18675	gene10562	protein_coding	o	7699.58	5029.52	4471.68	5200.23	9224.26	3592.44	6718.92	7031.68	6121.04	0.246215	0.359762	0.684383	0.493733	0.999991
19	NC_005107.4	-	49715527	49715523	49715537	Fxyd2	rna36040	gene20289	protein_coding	i	5658.01	5774.78	5201.98	6205.8	6029.05	5700.87	4165.38	6935.67	5708.94	-0.000553262	0.273673	-0.00202162	0.998387	0.999991
20	NC_005109.4	-	40742389	40742363	40742428	Sparc	rna43236	gene23767	protein_coding	o	6059.18	4814.66	4766.29	5052.99	7387.6	4739.66	5122.83	5954.84	5487.26	0.165375	0.275412	0.600465	0.548197	0.999991
21	NC_005100.4	-	221158080	221157961	221158305	-	-	-	-	u	12597	2934.05	4443.9	6227.35	11546.5	2987.94	2899.92	5147.6	6098.03	-0.21439	0.536473	-0.399629	0.68943	0.999991
22	NC_001665.2	-	5078	4925	5159	Trna	rna70603	gene39511	tRNA	=	4333.37	4964.39	6164.01	6040.6	6832.51	4011.6	5048.05	3386.42	5097.62	-0.15779	0.320396	-0.492485	0.622377	0.999991
23	NC_005113.4	+	46644036	46644004	46644466	Rn18s	rna54243	gene29634	rRNA	c	945.319	7875.61	1259.56	281.32	294.312	18852.3	24.6006	169.743	3712.85	0.900362	1.74737	0.515266	NA	NA
24	NC_005103.4	-	157676392	157676376	157676417	Gapdh	rna22282	gene12620	protein_coding	c	4142.72	4174.14	6690.35	4175.51	2833.84	6308.69	3339.78	3651.4	4414.55	-0.249691	0.3538	-0.70574	0.48035	0.999991
25	NC_005111.4	+	45031151	45031086	45031623	Pebp1	rna50380	gene27580	protein_coding	o	3445.65	4638.76	3113.44	4410.14	4350.1	4447.37	4100.43	6561.62	4383.44	0.318154	0.299115	1.06365	0.287487	0.999991
26	NC_005102.4	-	2686122	2686114	2686184	Ptgds	rna13897	gene7799	protein_coding	o	4885.47	4775.72	3095.16	3511.11	3952.72	5069.14	2345.92	5638.4	4159.21	0.0643068	0.353944	0.181686	0.855829	0.999991
27	NC_005109.4	+	55679407	55679378	55679928	Vamp2	rna43820	gene24091	protein_coding	o	3910.36	3852.54	3196.04	4295.22	4514.02	3780.43	4053.2	4891.84	4061.71	0.176621	0.255444	0.691427	0.489297	0.999991
28	NC_005115.4	-	6992082	6992055	6992125	Itih3	rna58065	gene31820	protein_coding	o	4053.35	3239.54	4701.23	5527.04	5608.07	3318.76	3964.64	2771.96	4148.07	-0.161858	0.33197	-0.487567	0.625857	0.999991
29	NC_005118.4	-	11324707	11324671	11324728	Mt3	rna64106	gene35224	protein_coding	o	5731.49	3005.89	3609.07	3175.92	5800.55	4224.84	2638.17	4586.91	4096.61	0.152633	0.355945	0.42881	0.668061	0.999991
30	NC_005102.4	-	23294814	23294800	23294850	Rpl35	rna14812	gene8324	protein_coding	o	4821.92	3652.46	2687.25	3396.19	5603.1	2780.69	2289.83	4871.87	3762.91	0.0948749	0.374613	0.253261	0.800066	0.999991
31	NC_005106.4	+	2511755	2511719	2512088	Atp5b	rna30584	gene17190	protein_coding	o	2224.28	3485.95	3300.58	4218.6	2304.82	4441.39	4094.53	3360.3	3428.81	0.102111	0.334557	0.305212	0.760205	0.999991
32	NC_005108.4	+	80004998	80004987	80005412	Rpl37a	rna40631	gene22474	protein_coding	o	3586.65	3223.43	3438.01	4001.93	4156.38	2496.37	3573.98	3965.54	3555.29	-0.00591407	0.280607	-0.021076	0.983185	0.999991
33	NC_005102.4	-	123117480	123117467	123117504	Avp	rna17062	gene9743	protein_coding	o	2494.37	1054.11	3082	1177.95	5799.31	3278.24	4343.49	6313.53	3442.88	1.33779	0.418933	3.19332	0.00140647	0.999991
34	NC_005109.4	-	13537030	13537011	13537048	Atp6v0c	rna42273	gene23278	protein_coding	o	1735.73	3526.9	3043.99	2229.01	2847.5	5101.69	1847.01	4709.8	3130.21	0.461073	0.399762	1.15337	0.248759	0.999991
35	NC_005101.4	+	548926	548916	549091	-	-	-	-	u	309.81	110.782	15271.9	580.597	617.186	376.648	5554.82	1214.32	3004.5	-1.06786	1.50348	-0.710262	NA	NA
36	NC_005119.4	-	1955359	1955338	1955402	Gabbr1	rna65851	gene36209	protein_coding	c	4049.38	2955.54	3633.2	3312.39	4147.69	3300.82	2615.54	3623.75	3454.79	-0.027241	0.277871	-0.0980348	0.921905	0.999991
37	NC_005103.4	-	89149313	89149252	89149423	Nap1l5	rna20709	gene11771	protein_coding	o	1978.02	3934.45	2285.92	2795.24	3395.14	4210.89	2872.37	3541.57	3126.7	0.350397	0.3177	1.10292	0.270063	0.999991
38	NC_005101.4	-	29675469	29675386	29675485	Map1b	rna9457	gene5231	protein_coding	c	3693.89	2803.8	2774.97	3066.99	3643.51	3415.08	3327.97	3848.8	3321.88	0.20666	0.250163	0.826102	0.408746	0.999991
39	NC_005106.4	-	74723181	74723152	74723195	Cox6c	rna32520	gene18386	protein_coding	o	4482.32	2989.78	2815.91	3459.64	4515.27	2605.32	3306.32	3436.34	3451.36	0.0123556	0.305348	0.0404639	0.967723	0.999991
40	NC_005106.4	-	140614749	140614735	140614791	Tuba1b	rna34364	gene19272	protein_coding	o	1066.46	3850.52	2712.11	2628.85	1572.15	5388	2518.12	3291.18	2878.42	0.31564	0.463239	0.681377	0.495633	0.999991
41	NC_005120.4	-	4737478	4737475	4737507	RGD1559731	rna67639	gene37261	protein_coding	i	5211.17	2673.55	3674.87	3661.95	3238.67	1551.1	3324.04	3900.26	3404.45	-0.341152	0.368086	-0.926826	0.354017	0.999991
42	NC_005100.4	+	226033233	226033151	226033711	Fth1	rna7578	gene4158	protein_coding	o	1884.68	2813.87	2243.52	2428.93	2722.07	6180.49	2077.28	3026.19	2922.13	0.579713	0.383576	1.51134	0.130702	0.999991
43	NC_005103.4	-	176701985	176701970	176702022	Ldhb	rna22939	gene12984	protein_coding	o	2738.64	3193.22	3510.39	3734.97	2723.32	2925.5	3388	2693.62	3113.46	-0.168042	0.256868	-0.654197	0.512985	0.999991
44	NC_005119.4	-	13130643	13130616	13130690	S100b	rna66756	gene36720	protein_coding	o	2269.96	3007.24	1946.72	2663.56	2792.86	2942.11	2539.77	4952.51	2889.34	0.419847	0.326781	1.28479	0.198865	0.999991
45	NC_005107.4	-	85838584	85838546	85838589	Eef1a1	rna37206	gene20843	protein_coding	p	3185.49	3017.98	2689.44	2845.52	2899.66	2942.77	3154.78	2958.6	2961.78	0.0266884	0.233526	0.114285	0.909012	0.999991
46	NC_005100.4	-	212537850	212537842	212537871	Caly	rna6491	gene3670	protein_coding	o	2478.48	2545.31	2316.62	2555.82	3535.47	3904.65	2290.81	2897.93	2815.64	0.351846	0.279219	1.26011	0.207631	0.999991
47	NC_005111.4	+	23817890	23817855	23818338	Ywhag	rna49742	gene27263	protein_coding	o	2204.42	3528.25	2293.23	2088.95	3179.07	3078.29	1901.14	3188.26	2682.7	0.16545	0.320148	0.516793	0.6053	0.999991
48	NC_005100.4	+	20730130	20730037	20730471	LOC686007	gene216	gene216	pseudogene	o	1606.64	2970.98	2763.28	3092.13	1394.57	3241.7	2839.9	2793.47	2587.83	-0.0229671	0.363464	-0.0631894	0.949616	0.999991
49	NC_005111.4	+	13719427	13719402	13719816	Actb	rna49269	gene26998	protein_coding	p	2532.1	2461.38	3598.84	3093.32	2590.44	2582.07	2953.06	1949.36	2720.07	-0.214264	0.283605	-0.755503	0.449947	0.999991
50	NC_005119.4	-	6937348	6937325	6937364	Mtch1	rna66441	gene36575	protein_coding	o	4363.16	2039.07	2050.53	2777.29	2566.85	2732.86	2534.85	3339.57	2800.52	-0.00630187	0.336678	-0.0187178	0.985066	0.999991
51	NC_005113.4	-	37458027	37457993	37458091	Ociad1	rna54063	gene29531	protein_coding	o	3703.82	2507.71	2620.73	2415.76	3982.52	2717.58	1943.45	1676.7	2696.03	-0.124063	0.355464	-0.349019	0.727075	0.999991
52	NC_005113.4	+	86677442	86677420	86677745	Ppia	rna55090	gene30025	protein_coding	o	2802.2	2852.81	2182.84	2279.29	2509.72	2615.28	2352.8	2718.97	2539.24	0.011565	0.251126	0.0460526	0.963268	0.999991
53	NC_005120.4	+	107509738	107509636	107510088	Plp1	rna69130	gene38332	protein_coding	c	2756.52	2443.92	2939.45	2741.37	2668.68	2200.77	2314.43	2507.75	2571.61	-0.167102	0.241099	-0.693083	0.488257	0.999991
54	NC_005104.4	-	126952047	126952038	126952070	Yipf1	rna25143	gene14278	protein_coding	i	2130.94	2946.81	2519.85	2475.62	2317.24	2681.04	1456.36	3077.66	2450.69	-0.0797663	0.317449	-0.251273	0.801603	0.999991
55	NC_005117.4	+	31625279	31625234	31625695	Ndfip1	rna62860	gene34496	protein_coding	o	2244.14	2464.07	2370.72	2685.11	2632.66	2924.17	2472.85	2264.27	2507.25	0.0761387	0.245632	0.30997	0.756584	0.999991
56	NC_005113.4	+	2326442	2326434	2326806	Atp5i	rna53170	gene29056	protein_coding	o	1582.81	2900.48	1467.17	1707.07	3089.65	3607.72	1487.85	2900.23	2342.87	0.533375	0.375068	1.42207	0.155005	0.999991
57	NC_005106.4	-	75574048	75574008	75574085	Ywhaz	rna32548	gene18406	protein_coding	c	3531.04	2015.57	2027.13	2042.26	3469.65	2622.59	1714.17	3079.19	2562.7	0.179537	0.345941	0.518982	0.603773	0.999991
58	NC_005100.4	-	37528109	37528108	37528109	Adcy2	rna622	gene413	protein_coding	i	1662.25	2355.3	1702.56	3932.49	3371.55	1173.79	3650.73	2606.83	2556.94	0.16216	0.430232	0.376913	0.706239	0.999991
59	NC_005105.4	-	8316859	8316854	8316917	Prepl	rna27600	gene15400	protein_coding	c	4208.26	1778.56	1654.31	2625.25	3814.88	2651.82	2452.19	1749.66	2616.87	0.0560461	0.395373	0.141755	0.887274	0.999991
60	NC_005106.4	-	12516355	12516343	12516373	Gpx4	rna31164	gene17573	protein_coding	o	2669.14	2169.32	2075.38	1461.67	3210.11	2492.39	1314.66	3563.08	2369.47	0.337383	0.374284	0.901409	0.367371	0.999991
61	NC_005102.4	-	165405589	165405576	165405649	Atp9a	rna18487	gene10466	protein_coding	o	2667.15	1789.97	1620.68	1988.39	2355.74	3682.78	2150.09	2636.78	2361.45	0.425436	0.312069	1.36328	0.172796	0.999991
62	NC_005100.4	-	81843664	81843652	81843702	Rabac1	rna2216	gene1405	protein_coding	o	2716.8	2219.67	1981.08	2207.46	2429	2533.57	2139.27	2828.8	2381.96	0.12271	0.25883	0.474096	0.635432	0.999991
63	NC_005113.4	-	106378949	106378913	106378999	Mdh1	rna55354	gene30171	protein_coding	c	1344.5	2780.97	1415.27	1927.34	1932.28	3452.94	1811.59	2785.02	2181.24	0.418249	0.363482	1.15067	0.249867	0.999991
64	NC_005107.4	+	128854489	128854440	128854886	Mobp	rna38539	gene21447	protein_coding	o	1558.98	2609.76	2666.05	2463.64	2463.78	2408.02	2060.55	1785.76	2252.07	-0.0937666	0.296736	-0.315993	0.752008	0.999991
65	NC_005109.4	-	15867883	15867869	15867915	Nsg2	rna42603	gene23412	protein_coding	o	2055.47	2569.48	1570.24	1969.24	2806.52	2331.63	2393.15	2699.76	2299.44	0.325395	0.274035	1.18742	0.235062	0.999991
66	NC_005114.4	+	44301190	44301179	44301609	-	-	-	-	u	5266.78	1778.56	1743.5	3203.46	3542.92	986.46	2943.22	1953.2	2677.26	-0.347112	0.47719	-0.72741	0.466975	0.999991
67	NC_005116.4	+	70490568	70490553	70490983	-	-	-	-	u	2875.68	2421.77	2565.9	2358.3	2440.18	1731.78	1546.89	2537.7	2309.77	-0.307902	0.288021	-1.06903	0.285058	0.999991
68	NC_005111.4	+	47027500	47027447	47027920	Cox6a1	rna50447	gene27615	protein_coding	o	2200.45	2201.55	1656.5	1377.87	2234.04	2803.94	1402.24	2832.64	2088.65	0.318769	0.336175	0.948222	0.343016	0.999991
69	NC_005100.4	-	166320189	166320185	166320199	Fchsd2	rna4891	gene2741	protein_coding	i	2518.2	1736.93	2186.5	2981.99	2995.28	883.496	2594.87	2432.48	2291.22	-0.0815345	0.40045	-0.203607	0.838661	0.999991
70	NC_005102.4	-	172563104	172563096	172563141	Atp5e	rna18685	gene10568	protein_coding	o	2941.21	1800.72	2367.79	2157.19	2970.44	1950.33	1755.5	1943.98	2235.9	-0.104086	0.308507	-0.337386	0.735826	0.999991
71	NC_005100.4	+	65540713	65540684	65541092	Ube2m	rna1407	gene876	protein_coding	c	4095.06	1578.48	2048.33	1922.55	3744.09	1376.39	2197.33	2036.15	2374.8	-0.0436896	0.41792	-0.104541	0.91674	0.999991
72	NC_005109.4	-	75262534	75262524	75262549	Dynll2	rna44963	gene24683	protein_coding	o	1930.36	1675.16	3158.76	2329.57	2193.06	1457.44	2331.16	1913.26	2123.6	-0.20445	0.319612	-0.639683	0.522379	0.999991
73	NC_005108.4	+	92930279	92930246	92930661	Itm2c	rna41063	gene22658	protein_coding	o	929.431	1860.47	1922.6	1987.2	1054.31	3241.7	2294.75	2207.43	1937.24	0.392755	0.403284	0.973893	0.330109	0.999991
74	NC_001665.2	-	3758	3747	3800	Trnq	rna70600	gene39507	tRNA	o	1265.06	2943.45	2516.92	2232.6	1307.64	1814.82	2142.22	1626.77	1981.19	-0.379055	0.342674	-1.10617	0.268654	0.999991
75	NC_005110.4	-	24425016	24424992	24425041	App	rna47058	gene25738	protein_coding	o	2061.43	1695.3	1631.65	2200.28	2340.84	2354.88	2119.59	2428.64	2104.08	0.28528	0.253352	1.12602	0.260155	0.999991
76	NC_005105.4	+	124224477	124224458	124224926	Calm1	rna29713	gene16622	protein_coding	c	1191.58	2114.93	2939.45	2165.57	1063	2166.89	2706.07	1478.53	1978.25	-0.182466	0.396206	-0.460534	0.645133	0.999991
77	NC_005102.4	+	172428488	172428421	172428937	Gnas	rna18676	gene10562	protein_coding	o	1872.76	1687.25	1627.26	2181.13	2239.01	2269.85	2069.4	2552.3	2062.37	0.309779	0.253796	1.22058	0.222245	0.999991
78	NC_005111.4	+	17713559	17713538	17714007	Prkar1b	rna49393	gene27057	protein_coding	o	1850.92	1983.34	1638.96	1794.46	2358.22	2253.25	1777.15	2589.16	2030.68	0.304955	0.259362	1.17579	0.239679	0.999991
79	NC_005109.4	+	40211978	40211955	40212460	Hint1	rna43208	gene23754	protein_coding	o	1678.14	1912.17	1761.77	1827.98	1641.69	2323	2166.82	2533.09	1980.58	0.271211	0.264356	1.02593	0.304923	0.999991
80	NC_005102.4	+	124531324	124531265	124531762	Prnp	rna17155	gene9784	protein_coding	o	1878.72	1825.56	1693.06	1915.37	1975.74	2295.1	2034.96	2218.95	1979.68	0.221629	0.235882	0.939574	0.347436	0.999991
81	NC_005104.4	-	165991074	165991067	165991094	-	-	-	-	u	2293.79	1716.79	2106.08	1754.96	2248.94	1333.22	2280.97	2425.56	2020.04	0.0746293	0.303043	0.246267	0.805476	0.999991
82	NC_005114.4	-	55254882	55254827	55254965	Itm2b	rna57208	gene31335	protein_coding	c	2240.17	1664.42	1726.68	2005.15	2416.59	1651.41	1988.71	2465.5	2019.83	0.158797	0.277775	0.571677	0.567541	0.999991
83	NC_005115.4	-	20435165	20435057	20435248	Rab3a	rna58613	gene32081	protein_coding	o	1644.38	2267.34	1793.94	2029.1	2039.07	1780.28	1813.56	2089.92	1932.2	-0.00281031	0.255064	-0.0110181	0.991209	0.999991
84	NC_005118.4	-	57321634	57321572	57321718	Agt	rna65640	gene36014	protein_coding	o	1390.17	1882.63	1554.16	1648.42	2312.27	2273.18	2277.03	2023.86	1920.22	0.455901	0.248641	1.83357	0.0667174	0.999991
85	NC_005111.4	-	9996917	9996841	9996930	Rpl21	rna49128	gene26906	protein_coding	o	2663.18	1799.37	1602.41	2008.74	3025.08	1434.85	1597.07	2074.56	2025.66	0.0106045	0.342209	0.0309884	0.975279	0.999991
86	NC_005100.4	-	221158598	221158580	221158644	-	-	-	-	u	818.217	3125.4	952.526	1195.91	596.075	2614.62	1937.55	2278.09	1689.8	0.285314	0.522399	0.546162	0.584955	0.999991
87	NC_005101.4	-	188112300	188112268	188112324	Syt11	rna11660	gene6593	protein_coding	o	1664.24	2160.59	1793.21	2122.47	1939.73	1832.09	1464.23	1774.24	1843.85	-0.143381	0.259048	-0.553492	0.579927	0.999991
88	NC_005100.4	-	219291684	219291657	219291702	Gstp1	rna7019	gene3900	protein_coding	o	2774.39	1434.8	1994.97	2031.49	3107.04	1516.56	1457.34	1512.33	1978.61	-0.116955	0.367506	-0.318241	0.750302	0.999991
89	NC_005105.4	+	133677771	133677474	133679188	RGD1566401	rna30021	gene16774	lncRNA	i	1549.05	1216.59	2628.77	1659.19	1282.8	1363.77	2520.09	2081.47	1787.72	0.0390372	0.365692	0.106749	0.914988	0.999991
90	NC_005110.4	-	32081604	32081571	32081625	Atp5o	rna47230	gene25862	protein_coding	o	1479.54	2020.94	1603.14	1521.52	1517.51	2142.98	1663.99	1934.77	1735.55	0.131621	0.271157	0.485403	0.62739	0.999991
91	NC_005109.4	+	92382900	92382670	92383185	Mapt	rna45973	gene25168	protein_coding	c	2470.54	1693.96	1392.6	1630.46	2724.56	1587.64	1666.94	1673.62	1855.04	0.0909685	0.32628	0.278805	0.780395	0.999991
92	NC_005101.4	-	29688176	29687910	29688230	Map1b	rna9457	gene5231	protein_coding	c	851.979	1612.72	2103.89	1578.98	1462.87	2665.1	1311.71	1440.13	1628.42	0.161691	0.378632	0.427041	0.66935	0.999991
93	NC_005106.4	-	12426809	12426786	12426824	Atp5d	rna31152	gene17569	protein_coding	o	1795.31	1830.26	1574.63	1511.95	2632.66	1478.69	1205.43	2117.57	1768.31	0.147239	0.326251	0.451307	0.651769	0.999991
94	NC_005115.4	+	27014815	27014786	27015218	Cpe	rna58875	gene32202	protein_coding	o	607.705	2671.53	910.127	1222.25	1397.05	2499.03	1302.85	1976.24	1573.35	0.40612	0.459696	0.883454	0.376991	0.999991
95	NC_005119.4	-	17075779	17075760	17075828	Zwint	rna66858	gene36775	protein_coding	o	973.122	2823.27	1367.75	1262.95	1230.65	1875.93	1530.16	1781.92	1605.72	-0.00268634	0.383498	-0.00700484	0.994411	0.999991
96	NC_005117.4	+	54123063	54123009	54123519	RGD1312005	rna63159	gene34708	protein_coding	o	1507.35	1262.25	2314.43	2317.6	1592.02	1396.99	2073.34	1411.71	1734.46	-0.193502	0.324567	-0.596184	0.551053	0.999991
97	NC_005120.4	-	156407975	156407940	156408050	Atp6ap1	rna69922	gene38818	protein_coding	o	3320.53	954.07	1399.18	1594.55	4062	1377.72	1363.86	1434.75	1938.33	0.181282	0.488175	0.371346	0.71038	0.999991
98	NC_005119.4	+	29856879	29856852	29857295	Psap	rna67116	gene36926	protein_coding	o	1143.92	1008.45	2481.1	1972.83	1147.44	2564.8	2006.43	753.476	1634.81	-0.0297341	0.450757	-0.0659647	0.947406	0.999991
99	NC_005100.4	-	57470879	57470864	57470906	Psmb1	rna1084	gene669	protein_coding	o	2264	1405.26	1238.36	1780.1	2777.96	1774.3	1414.04	1493.13	1768.39	0.158147	0.346451	0.456478	0.648046	0.999991
100	NC_005101.4	-	204003744	204003730	204003759	Atp1a1	rna12438	gene7022	protein_coding	o	1709.92	1317.3	1072.41	2013.53	2126	2178.18	1450.45	1700.51	1696.04	0.287062	0.316616	0.906657	0.364588	0.999991
101	NC_005105.4	+	133777253	133777241	133777613	-	-	-	-	u	1703.96	1197.12	1903.59	2266.12	2902.14	1025.65	2106.8	1059.17	1770.57	0.00432612	0.409625	0.0105611	0.991574	0.999991
102	NC_005113.4	-	82053681	82053672	82053691	RGD1560394	rna54746	gene29902	protein_coding	o	1709.92	1454.27	1850.96	1653.2	2163.25	1425.55	1488.83	1521.55	1658.44	-0.0153575	0.274793	-0.0558876	0.955431	0.999991
103	NC_005109.4	+	65590093	65590064	65590619	Aldoc	rna44544	gene24469	protein_coding	o	1557	1847.04	1471.55	1841.15	1975.74	1450.79	1638.4	1368.7	1643.8	-0.0626873	0.267771	-0.234108	0.814901	0.999991
104	NC_005100.4	+	263780499	263780467	263780823	Cyp2c23	rna8523	gene4720	protein_coding	x	1298.82	1878.6	1660.89	1503.57	1485.22	1525.19	1065.7	2029.24	1555.9	-0.0552937	0.304746	-0.181442	0.856021	0.999991
105	NC_005114.4	+	57894507	57894469	57894998	Tpt1	rna57277	gene31365	protein_coding	o	699.059	1477.77	1265.41	1965.65	861.825	2315.03	2248.5	1365.63	1524.86	0.328187	0.422949	0.775948	0.43778	0.999991
106	NC_005101.4	-	115823538	115823509	115823558	Cldn11	rna10485	gene5913	protein_coding	o	2109.09	1507.98	1616.3	1576.59	2039.07	1670.67	1231.02	1439.36	1648.76	-0.0935692	0.290184	-0.322448	0.747113	0.999991
107	NC_005111.4	-	48621466	48621446	48621484	Iscu	rna50566	gene27669	protein_coding	o	3149.74	1294.47	1249.32	960.079	3644.75	1507.92	612.064	1582.99	1750.17	0.143667	0.528923	0.271623	0.785912	0.999991
108	NC_005109.4	+	56604226	56604116	56604578	Gabarap	rna43976	gene24164	protein_coding	o	2337.48	1546.92	1278.56	1138.45	4057.03	1207.67	964.344	1278.07	1726.07	0.252659	0.47986	0.526526	0.598523	0.999991
109	NC_005109.4	+	55998688	55998674	55999028	Naa38	rna43861	gene24116	protein_coding	o	2875.68	1138.04	1315.85	1338.36	2920.77	1396.99	1150.33	1708.19	1730.52	0.106778	0.419239	0.254695	0.798958	0.999991
110	NC_005109.4	+	63921714	63921671	63922144	Ywhae	rna44438	gene24413	protein_coding	o	2077.32	1494.55	1253.71	1335.97	1975.74	1327.24	1483.91	1987.76	1617.03	0.137657	0.305457	0.45066	0.652235	0.999991
111	NC_005116.4	-	6117539	6117481	6117561	Ntrk2	rna60083	gene32918	protein_coding	c	3113.99	1346.17	1171.83	1495.19	3832.26	1237.56	1018.47	980.825	1774.54	-0.0114874	0.504933	-0.0227503	0.981849	0.999991
112	NC_005103.4	-	179259307	179259290	179259433	Bcat1	rna22988	gene12999	protein_coding	o	1290.88	1910.83	1241.28	1203.09	2037.83	1954.98	1488.83	1027.68	1519.42	0.20462	0.333005	0.614466	0.538908	0.999991
113	NC_005120.4	-	16407248	16407219	16407248	-	-	-	-	u	2706.87	1511.34	1755.19	1385.05	1911.16	908.739	991.897	1933.23	1637.94	-0.356636	0.382048	-0.933484	0.35057	0.999991
114	NC_005100.4	-	90130970	90130945	90130993	LOC108349721	gene1722	gene1722	pseudogene	o	1139.94	1883.3	1380.91	1391.04	1141.23	1332.55	1578.38	2006.2	1481.69	0.063506	0.311198	0.204069	0.838299	0.999991
115	NC_005115.4	+	49270528	49270304	49271239	Slc25a4	rna59073	gene32358	protein_coding	o	1511.32	1669.79	1358.98	1602.93	1650.38	1397.65	1618.72	1529.99	1542.47	0.0123373	0.242755	0.0508218	0.959467	0.999991
116	NC_005109.4	-	107336671	107336654	107336689	Timp2	rna46606	gene25471	protein_coding	p	1044.62	1508.65	1163.06	1146.83	1238.1	1920.44	1516.38	2123.71	1457.72	0.483014	0.299173	1.6145	0.10642	0.999991
117	NC_005106.4	-	11401370	11401352	11401400	Eef2	rna30986	gene17503	protein_coding	p	828.147	2062.56	1355.32	1144.43	1198.36	2116.4	920.063	1613.71	1404.88	0.116952	0.388852	0.300763	0.763595	0.999991
118	NC_005108.4	+	43262050	43262018	43262502	Cox5b	rna39839	gene22106	protein_coding	o	1225.34	1720.15	1496.41	1613.7	1402.02	1780.94	1390.43	1188.2	1477.15	-0.0723518	0.275264	-0.262845	0.79267	0.999991
119	NC_005104.4	+	172981408	172981385	172981824	Gnb1	rna27194	gene15240	protein_coding	o	2160.73	1338.12	1058.53	1418.57	2674.89	1327.9	1394.36	1572.24	1618.17	0.222523	0.360618	0.617061	0.537195	0.999991
120	NC_005117.4	-	24172589	24172550	24172606	Syt4	rna62510	gene34314	protein_coding	o	2412.95	1231.36	1282.95	1341.96	2256.39	1403.63	1038.15	1744.29	1588.96	0.0402184	0.365852	0.109931	0.912464	0.999991
121	NC_005105.4	+	44322873	44322849	44323316	Kidins220	rna28270	gene15800	protein_coding	o	1952.2	1328.72	1209.85	1319.21	2089.99	1272.77	1372.71	1864.11	1551.19	0.184617	0.311884	0.591942	0.55389	0.999991
122	NC_005116.4	-	10753865	10753857	10753897	Lnc012	rna60341	gene33029	lncRNA	i	2148.81	1259.56	1553.43	1453.29	2466.26	937.303	1235.94	1665.18	1589.97	-0.0248302	0.370041	-0.0671013	0.946501	0.999991
123	NC_005103.4	-	157043927	157043894	157043965	Clstn3	rna22152	gene12578	protein_coding	p	2196.48	1534.84	996.388	1065.42	1954.63	1740.42	1063.73	1673.62	1528.19	0.152017	0.360435	0.421759	0.673201	0.999991
124	NC_005118.4	-	9766439	9766425	9766507	Ndrg4	rna63977	gene35175	protein_coding	o	794.386	2327.77	926.209	1538.28	1141.23	1549.77	1660.05	1221.23	1394.87	-0.00455396	0.389762	-0.011684	0.990678	0.999991
125	NC_005104.4	+	169512875	169512851	169513190	Rpl22	rna27045	gene15189	protein_coding	o	2051.5	1203.16	1427.69	1717.85	1824.24	1218.96	1451.44	1443.97	1542.35	-0.107274	0.297205	-0.360944	0.718141	0.999991
126	NC_005100.4	-	199251841	199251827	199251863	Stx1b	rna6131	gene3480	protein_coding	o	2035.61	1438.16	1329.74	1260.55	2774.23	1085.44	1154.26	1363.32	1555.16	0.0727299	0.381527	0.190629	0.848817	0.999991
127	NC_005106.4	+	126351731	126351712	126352283	Atxn10	rna33885	gene19037	protein_coding	o	1517.28	1381.76	1377.25	1394.63	1519.99	1764.33	1272.34	1374.84	1450.3	0.0653131	0.252069	0.259108	0.795552	0.999991
128	NC_005106.4	+	117307919	117307888	117308338	Grina	rna33260	gene18768	protein_coding	o	1553.02	1566.39	1426.23	1012.75	1302.67	1705.21	734.083	1924.01	1403.05	0.0280146	0.361665	0.0774602	0.938257	0.999991
129	NC_005105.4	-	6695810	6695801	6695826	Cox7a2l	rna27541	gene15372	protein_coding	c	1553.02	1069.55	1589.25	1544.27	1567.18	1608.89	1376.65	1424.77	1466.7	0.0550001	0.267269	0.205785	0.836959	0.999991
130	NC_005119.4	+	3425910	3425826	3426486	Tubb5	rna65988	gene36360	protein_coding	o	2363.3	1036.65	1753	1370.69	2041.56	1122.64	1142.45	1512.33	1542.83	-0.164343	0.360952	-0.455304	0.648891	0.999991
131	NC_005101.4	-	57860881	57860865	57860909	Slc1a3	rna9953	gene5537	protein_coding	o	877.796	1682.55	929.865	1040.29	1506.33	1956.98	1016.5	1874.86	1360.64	0.487451	0.349739	1.39376	0.163391	0.999991
132	NC_005104.4	+	159607003	159606936	159607333	Rps21-ps1	gene14971	gene14971	pseudogene	o	877.796	1456.95	972.995	1029.51	1050.58	2487.74	1068.65	1696.67	1330.11	0.539191	0.370604	1.4549	0.145698	0.999991
133	NC_005103.4	-	100882221	100882200	100882265	Tmsb10	rna20926	gene11890	protein_coding	o	957.235	1117.22	1701.1	1557.44	931.367	1657.39	1417	1712.03	1381.35	0.100275	0.333701	0.300493	0.763801	0.999991
134	NC_005107.4	-	53836805	53836769	53836829	Ncam1	rna36193	gene20351	protein_coding	o	1634.45	1210.55	1158.68	1547.86	1870.18	1275.42	1810.61	1440.9	1493.58	0.205102	0.285321	0.718847	0.472235	0.999991
135	NC_005114.4	-	34340605	34340583	34340629	Nedd8	rna56537	gene30967	protein_coding	o	1306.76	1289.77	1397.72	1574.19	1362.28	1905.16	1219.21	1249.65	1413.09	0.04311	0.27858	0.154749	0.877019	0.999991
136	NC_005109.4	+	104105086	104105075	104105486	-	-	-	-	u	1213.42	1280.37	852.376	2455.27	2650.05	531.426	2422.67	1108.32	1564.24	0.210176	0.506624	0.414855	0.678248	0.999991
137	NC_005105.4	+	133795096	133795092	133795255	-	-	-	-	u	3262.94	666.708	2340.74	1606.52	3217.56	321.513	1465.21	628.281	1688.68	-0.48393	0.624826	-0.774504	0.438633	0.999991
138	NC_005100.4	-	170387627	170387582	170387672	Apbb1	rna5204	gene2985	protein_coding	o	1457.7	1311.93	1392.6	1471.24	1410.71	1558.41	1284.15	1483.91	1421.33	0.0268191	0.238779	0.112318	0.910571	0.999991
139	NC_005100.4	-	101116642	101116628	101116690	Rps11	rna3431	gene1963	protein_coding	o	1227.33	1477.77	1625.07	1292.87	1130.06	1625.5	1725	973.144	1384.59	-0.0445572	0.304866	-0.146153	0.883801	0.999991
140	NC_005116.4	+	10392780	10392764	10393201	Sncb	rna60310	gene33014	protein_coding	o	937.375	1558.34	1881.66	1303.65	940.06	1550.44	1081.44	1363.32	1327.04	-0.203703	0.328585	-0.61994	0.535297	0.999991
141	NC_005104.4	+	166601687	166601666	166602106	Clstn1	rna26921	gene15129	protein_coding	o	923.473	1499.92	880.155	1324	1341.17	1760.35	1245.78	1763.49	1342.29	0.400719	0.310732	1.2896	0.197191	0.999991
142	NC_005105.4	-	145777303	145777292	145777327	Rpl32-ps3	gene17113	gene17113	pseudogene	c	1183.63	1616.75	1095.08	1142.04	639.539	2095.15	1029.29	1628.31	1303.72	0.0985691	0.394479	0.249872	0.802686	0.999991
143	NC_005120.4	+	28595307	28595219	28595703	Tmsb4x	rna68134	gene37550	protein_coding	e	1114.13	1191.08	1315.12	1535.89	1786.98	1199.69	1535.08	1579.15	1407.14	0.242075	0.273339	0.885622	0.375821	0.999991
144	NC_005116.4	+	72231564	72231532	72231928	Atp5c1	rna61819	gene33918	protein_coding	o	1519.26	1442.86	989.809	1170.77	1661.56	1365.77	1346.15	1736.61	1404.1	0.254894	0.27997	0.910431	0.362595	0.999991
145	NC_005100.4	+	216253463	216253352	216253756	Cd81	rna6827	gene3828	protein_coding	o	1797.3	1430.1	1272.72	1496.38	1620.58	1050.23	1516.38	1371.77	1444.43	-0.108929	0.280015	-0.389012	0.697267	0.999991
146	NC_005120.4	-	106556837	106556832	106556855	Bex2	rna69090	gene38308	protein_coding	c	1473.59	1367.66	985.423	916.983	1584.57	1569.7	974.185	2045.37	1364.68	0.38085	0.334006	1.14025	0.254183	0.999991
147	NC_005103.4	-	35729624	35729590	35729646	Rps4x-ps9	gene11083	gene11083	pseudogene	o	2021.71	1339.46	1816.6	1179.15	1136.27	1257.49	1060.78	1347.96	1394.93	-0.403712	0.293397	-1.37599	0.168825	0.999991
148	NC_005119.4	-	38966022	38966011	38966037	Serinc1	rna67308	gene37042	protein_coding	c	524.295	1662.41	993.464	1048.67	660.65	1936.38	1358.94	1720.48	1238.16	0.423897	0.43452	0.975552	0.329287	0.999991
149	NC_005103.4	+	58079060	58078907	58079355	Copg2	rna19889	gene11259	protein_coding	i	897.656	436.415	4846.7	951.7	526.533	1172.46	708.498	453.929	1249.24	-1.31784	0.622701	-2.11633	0.0343171	0.999991
150	NC_005109.4	-	45273399	45273364	45273437	Rnf187	rna43374	gene23883	protein_coding	o	846.021	1465.01	1401.38	1319.21	1106.46	1814.82	1170.01	1204.33	1290.91	0.0730039	0.317289	0.230087	0.818024	0.999991
151	NC_005101.4	-	252602326	252602318	252602359	Prkacb	rna13496	gene7611	protein_coding	c	1197.54	1571.77	839.948	1179.15	1048.1	1528.51	1345.16	1845.67	1319.48	0.268692	0.320996	0.837056	0.402561	0.999991
152	NC_005111.4	+	14078122	14078091	14078402	Mmd2	rna49276	gene27004	protein_coding	o	758.638	1348.19	1297.57	1328.79	796.008	1486.66	1140.48	1871.79	1253.52	0.161333	0.359358	0.448948	0.653469	0.999991
153	NC_005108.4	-	82446628	82446611	82446686	Ptprn	rna40796	gene22543	protein_coding	o	955.249	1371.01	1338.51	1370.69	1120.12	1515.89	1392.4	1201.26	1283.14	0.0538205	0.274543	0.196037	0.844581	0.999991
154	NC_005115.4	-	61735207	61735181	61735215	Saraf	rna59266	gene32481	protein_coding	o	458.758	1311.26	1106.77	1199.5	614.702	1854.01	1604.94	1467.01	1202.12	0.441966	0.432851	1.02106	0.307227	0.999991
155	NC_005108.4	+	82444673	82444640	82445126	Dnajb2	rna40789	gene22542	protein_coding	o	1773.47	1435.47	1030.75	1148.02	1974.5	1117.99	1109.98	1255.03	1355.65	0.0189126	0.33047	0.0572295	0.954362	0.999991
156	NC_005101.4	-	54882139	54882138	54882149	Prkaa1	rna9892	gene5496	protein_coding	i	1286.9	1062.17	1092.15	1720.24	1813.06	786.511	1317.61	1749.66	1353.54	0.134797	0.353548	0.381269	0.703003	0.999991
157	NC_005109.4	-	90990755	90990745	90990783	Gfap	rna45872	gene25135	protein_coding	o	1423.94	1282.39	1417.46	1523.92	1698.81	1501.28	1293.01	385.571	1315.8	-0.211397	0.422198	-0.500706	0.616578	0.999991
158	NC_005118.4	-	57321783	57321774	57321804	Agt	rna65640	gene36014	protein_coding	c	1362.37	1126.62	1221.54	1157.6	2008.03	1113.34	1044.05	1447.81	1310.17	0.205405	0.308897	0.664964	0.506073	0.999991
159	NC_005100.4	+	165663825	165663754	165664412	Rab6a	rna4857	gene2732	protein_coding	o	1128.03	1232.7	1073.15	1233.02	1231.89	1436.18	1329.42	1403.26	1258.46	0.210845	0.239104	0.88181	0.377879	0.999991
160	NC_005100.4	-	165665909	165665899	165665921	Plekhb1	rna4859	gene2733	protein_coding	c	2444.72	1183.02	1378.71	1442.51	2157.05	705.468	1004.69	1010.01	1415.77	-0.40284	0.413277	-0.974746	0.329686	0.999991
161	NC_005107.4	-	66862138	66862114	66862140	Rplp1	rna36673	gene20585	protein_coding	p	1360.39	1799.37	976.65	982.824	1154.89	1835.41	865.942	854.093	1228.7	-0.11992	0.369971	-0.324134	0.745837	0.999991
162	NC_005102.4	+	113324463	113324440	113324895	Ckmt1b	rna16725	gene9556	protein_coding	o	1519.26	1260.23	1272.72	1076.2	1067.97	1400.31	915.143	1553.8	1258.2	-0.0538228	0.296105	-0.181769	0.855764	0.999991
163	NC_005100.4	-	225034259	225034245	225034285	Gng3	rna7513	gene4126	protein_coding	c	1634.45	1366.99	1070.22	1144.43	2375.61	988.453	1159.18	1030.75	1346.26	0.0904426	0.369403	0.244835	0.806584	0.999991
164	NC_005103.4	+	148617979	148617936	148618306	LOC500299	gene12440	gene12440	pseudogene	c	1761.55	1377.73	1224.47	413.002	3182.79	1114	328.664	1222.77	1328.12	0.291919	0.586465	0.49776	0.618653	0.999991
165	NC_005102.4	+	113271633	113271611	113272114	Map1a	rna16707	gene9554	protein_coding	c	1145.9	1278.36	1069.49	1004.37	1271.63	1499.29	1000.75	1569.17	1229.87	0.24792	0.276882	0.895398	0.370574	0.999991
166	NC_005100.4	-	78844516	78844507	78844544	Calm3	rna1950	gene1260	protein_coding	o	1890.64	1075.6	1155.75	1049.86	2148.35	1251.51	860.038	1220.46	1331.53	0.0842525	0.371924	0.226531	0.820788	0.999991
167	NC_005102.4	-	15362892	15362858	15362910	Ndufa8	rna14687	gene8121	protein_coding	o	520.323	1273.66	1311.46	1329.99	628.362	1718.5	1139.5	1312.63	1154.3	0.113024	0.412457	0.274027	0.784064	0.999991
168	NC_005101.4	+	148782451	148782419	148782806	Selt	rna10996	gene6209	protein_coding	p	1404.08	1233.38	1108.23	1314.42	1589.53	968.524	1315.64	1316.47	1281.28	0.0367074	0.276757	0.132634	0.894483	0.999991
169	NC_005102.4	-	105235066	105235052	105235126	Scg5	rna16431	gene9419	protein_coding	o	1608.63	1246.8	1622.15	837.974	1162.35	909.403	696.69	1794.21	1234.78	-0.220042	0.381546	-0.576712	0.564134	0.999991
170	NC_005102.4	+	125441599	125441522	125441980	Chgb	rna17180	gene9798	protein_coding	o	1012.84	1178.99	1257.36	1104.93	854.374	1371.08	1158.2	1589.14	1190.86	0.126901	0.295324	0.4297	0.667414	0.999991
171	NC_005105.4	+	111304212	111304185	111304633	Ahsa1	rna29554	gene16533	protein_coding	o	1958.16	843.96	880.886	1298.86	2112.34	1169.8	1289.07	1215.85	1346.12	0.217362	0.376616	0.577144	0.563842	0.999991
172	NC_005107.4	+	69126812	69126612	69127083	Rpl4	rna36754	gene20620	protein_coding	o	691.115	1440.17	1175.49	1018.74	799.734	1046.91	1053.89	2030.78	1157.1	0.188305	0.383883	0.490528	0.62376	0.999991
173	NC_005113.4	+	77402008	77401892	77402353	Nsg1	rna54521	gene29823	protein_coding	o	675.228	1315.96	962.761	1434.13	854.374	1759.68	1440.61	917.843	1170.07	0.179869	0.372833	0.482437	0.629496	0.999991
174	NC_005103.4	+	67385269	67385242	67385655	Ndufb2	rna20098	gene11370	protein_coding	o	1199.52	1428.76	884.541	1112.11	1984.43	1065.51	1047.99	1264.24	1248.39	0.212906	0.328371	0.648371	0.516745	0.999991
175	NC_005118.4	+	9613327	9613306	9613694	Got2	rna63969	gene35170	protein_coding	o	1511.32	984.284	1240.55	1084.58	1419.4	1099.39	1038.15	1599.89	1247.19	0.0981649	0.295649	0.332032	0.739865	0.999991
176	NC_005103.4	-	7210760	7210756	7210811	Agap3	rna19137	gene10813	protein_coding	i	1048.59	1411.3	1112.62	1186.33	1138.75	1421.56	677.993	1231.98	1153.64	-0.0903959	0.316795	-0.285345	0.77538	0.999991
177	NC_005113.4	-	2860962	2860875	2860983	Rpl5	rna53203	gene29070	protein_coding	o	1878.72	995.026	854.569	1177.95	1991.88	1036.28	920.063	1298.81	1269.16	0.0978833	0.377461	0.259321	0.795388	0.999991
178	NC_005104.4	-	144769455	144769430	144769469	Ncdn	rna25892	gene14642	protein_coding	o	1068.45	1511.34	855.3	922.969	1410.71	1293.36	893.495	1234.29	1148.74	0.148423	0.312636	0.474747	0.634968	0.999991
179	NC_005117.4	+	26569702	26569692	26570074	Epb41l4a	rna62603	gene34348	protein_coding	x	1555.01	1061.5	1171.83	1133.66	1686.39	895.453	1027.32	1277.3	1226.06	-0.0100604	0.313899	-0.0320496	0.974432	0.999991
180	NC_005101.4	+	53116198	53116139	53116508	Sepp1	rna9861	gene5472	protein_coding	o	861.908	667.379	1570.24	1119.29	1293.98	1248.85	1700.4	824.907	1160.87	0.26396	0.368289	0.716721	0.473546	0.999991
181	NC_005100.4	+	81370633	81370460	81370859	Cadm4	rna2165	gene1376	protein_coding	p	2162.71	976.227	1264.67	1052.26	2700.96	540.062	1264.47	560.691	1315.26	-0.106905	0.517016	-0.206773	0.836187	0.999991
182	NC_005103.4	+	82086894	82086862	82087344	-	-	-	-	u	937.375	1164.22	1209.12	1237.81	1153.65	936.639	969.265	1398.65	1125.84	-0.0297257	0.276712	-0.107425	0.914452	0.999991
183	NC_005101.4	-	188403594	188403585	188403612	Fdps	rna11698	gene6601	protein_coding	o	1048.59	1040.68	1411.61	1264.14	1121.37	849.618	1282.18	1067.62	1135.73	-0.142019	0.277388	-0.511985	0.608661	0.999991
184	NC_005108.4	+	10646839	10646813	10647246	Ptprs	rna38995	gene21701	protein_coding	p	943.333	1278.36	978.112	1102.53	948.752	1145.22	1135.56	1176.68	1088.57	0.0339473	0.258822	0.131161	0.895648	0.999991
185	NC_005118.4	+	56213299	56213278	56213728	Tcf25	rna65575	gene35979	protein_coding	o	365.417	1221.96	1373.6	1150.42	440.847	1192.39	1411.09	1000.03	1019.47	-0.0246539	0.466639	-0.052833	0.957865	0.999991
186	NC_005109.4	-	85141418	85141346	85141446	Npepps	rna45343	gene24866	protein_coding	c	1217.4	1134.68	1130.17	1367.1	987.249	901.432	955.488	1240.43	1116.74	-0.247178	0.25862	-0.955755	0.339196	0.999991
187	NC_005109.4	+	56257881	56257831	56258180	Fxr2	rna43898	gene24128	protein_coding	o	2365.28	743.92	701.785	1060.64	2124.76	991.774	864.958	1128.29	1247.68	0.0701388	0.4631	0.151455	0.879617	0.999991
188	NC_005106.4	+	143929402	143929386	143929748	Myg1	rna34609	gene19391	protein_coding	o	957.235	848.659	1120.66	1223.44	1173.52	1127.95	1190.67	1162.86	1100.63	0.165604	0.257236	0.643781	0.519717	0.999991
189	NC_005118.4	+	55920040	55920009	55920284	Rpl13	rna65550	gene35967	protein_coding	o	1441.81	1142.74	845.797	833.186	1311.36	1079.46	631.744	1564.56	1106.33	0.106488	0.364474	0.292168	0.770158	0.999991
190	NC_005118.4	-	25956771	25956757	25956793	Calr	rna64551	gene35454	protein_coding	o	905.6	1119.91	1029.28	1294.07	832.021	1185.74	1153.28	1016.16	1067.01	-0.0547839	0.274682	-0.199444	0.841915	0.999991
191	NC_005107.4	-	49220495	49220438	49220512	Atp5l	rna36004	gene20270	protein_coding	c	675.228	1119.91	857.493	1013.95	774.897	1593.61	898.415	1154.41	1010.99	0.269677	0.336697	0.800949	0.423161	0.999991
192	NC_005103.4	-	4021026	4021002	4021041	Dpp6	rna19063	gene10771	protein_coding	o	1551.04	938.628	1023.44	987.613	1563.45	953.91	786.236	1193.58	1124.74	-0.000264545	0.334049	-0.000791935	0.999368	0.999991
193	NC_005120.4	-	156400737	156400727	156400772	Gdi1	rna69921	gene38817	protein_coding	c	558.056	1477.1	862.61	1085.78	545.16	1268.78	1067.67	1112.93	997.26	0.00323538	0.395144	0.00818784	0.993467	0.999991
194	NC_005107.4	-	59184109	59184102	59184136	Acsbg1	rna36373	gene20438	protein_coding	o	1044.62	877.53	955.45	1118.1	1215.74	1173.79	1100.14	1154.41	1079.97	0.217654	0.243515	0.893801	0.371429	0.999991
195	NC_005107.4	-	116370742	116370723	116370760	Gnai2	rna37912	gene21191	protein_coding	c	859.922	1050.75	805.59	1047.47	797.25	1266.79	1127.69	1357.18	1039.08	0.273671	0.291904	0.937538	0.348482	0.999991
196	NC_005107.4	-	60806846	60806839	60806888	Tspan3	rna36427	gene20472	protein_coding	o	1545.08	574.725	1526.38	1401.81	535.225	1005.72	1663	682.046	1116.75	-0.37675	0.443383	-0.849715	0.395483	0.999991
197	NC_005108.4	+	9968428	9968408	9968642	Tubb4a	rna38925	gene21668	protein_coding	o	627.565	1183.02	1658.7	1046.27	666.859	1090.75	758.683	917.075	993.615	-0.396261	0.35986	-1.10115	0.27083	0.999991
198	NC_005105.4	+	104250180	104250136	104250560	Galnt16	rna29259	gene16398	protein_coding	o	1558.98	917.143	913.782	1053.45	1253	910.732	1075.54	1208.94	1111.45	0.00312729	0.301973	0.0103562	0.991737	0.999991
199	NC_005109.4	+	92384517	92384501	92384961	Mapt	rna45973	gene25168	protein_coding	c	1227.33	751.305	963.492	812.835	1693.85	1131.27	1137.53	1043.81	1095.18	0.415891	0.309036	1.34577	0.178376	0.999991
200	NC_005113.4	-	84935479	84935468	84935492	Uqcr10	rna54957	gene29974	protein_coding	o	577.916	1250.16	774.156	827.2	1204.57	1261.47	702.594	1341.82	992.486	0.393885	0.35274	1.11664	0.264146	0.999991
201	NC_005115.4	+	60216144	60216132	60216403	-	-	-	-	u	1030.72	1006.44	1401.38	1326.39	804.701	809.096	1369.76	707.392	1056.98	-0.369006	0.322245	-1.14511	0.252165	0.999991
202	NC_005109.4	-	94979759	94979752	94979775	Ddx5	rna46093	gene25225	protein_coding	c	1644.38	768.762	950.333	1145.63	1629.27	886.153	1123.76	921.684	1133.75	0.017476	0.354237	0.0493341	0.960653	0.999991
203	NC_005101.4	+	62212628	62212603	62213168	Zfr	rna10025	gene5587	protein_coding	o	661.326	1270.3	693.012	1060.64	848.165	1066.17	1250.7	1192.81	1005.39	0.240916	0.327526	0.735563	0.461997	0.999991
204	NC_005106.4	+	11380906	11380872	11381318	Atcay	rna30978	gene17500	protein_coding	p	2063.42	809.718	758.805	885.859	1922.34	879.51	712.434	1185.13	1152.15	0.0580888	0.441755	0.131495	0.895383	0.999991
205	NC_005104.4	-	144250416	144250413	144250451	Map7d1	rna25865	gene14629	protein_coding	c	1276.97	1044.04	878.693	907.407	1239.34	1082.78	835.437	1169	1054.21	0.0761458	0.282897	0.269164	0.787803	0.999991
206	NC_005103.4	+	58084754	58084476	58085020	Copg2	rna19889	gene11259	protein_coding	i	1666.22	856.716	1134.55	954.094	1851.56	631.733	1159.18	796.488	1131.32	-0.0548268	0.403476	-0.135886	0.891911	0.999991
207	NC_005102.4	-	2507749	2507730	2507766	Grin1	rna13861	gene7784	protein_coding	o	1380.25	1038	800.473	828.398	1456.66	751.968	797.06	1362.56	1051.92	0.110895	0.352821	0.314311	0.753285	0.999991
208	NC_005109.4	-	57669534	57669515	57669556	LOC691995	rna44118	gene24223	protein_coding	o	732.821	911.772	959.106	1119.29	553.853	1113.34	1157.21	1246.58	974.247	0.128949	0.339052	0.380321	0.703707	0.999991
209	NC_005100.4	+	226249117	226249092	226249518	Fads1	rna7583	gene4164	protein_coding	o	1557	921.843	929.134	1027.12	1472.8	815.075	1122.77	798.024	1080.47	-0.0748793	0.337802	-0.221666	0.824574	0.999991
210	NC_005109.4	-	56848365	56848364	56848393	Rnasek	rna44029	gene24182	protein_coding	c	748.708	1289.77	1144.06	944.517	787.315	989.781	810.837	970.072	960.632	-0.215326	0.290469	-0.741306	0.458508	0.999991
211	NC_005115.4	+	6634601	6634572	6634891	Tkt	rna58037	gene31807	protein_coding	o	899.642	982.27	795.356	893.041	1367.25	1151.2	807.885	1013.08	988.716	0.281205	0.281388	0.99935	0.317625	0.999991
212	NC_005114.4	-	28305818	28305783	28305843	Ndrg2	rna56263	gene30666	protein_coding	o	838.077	1162.88	611.137	690.73	1208.29	1162.49	679.961	1332.6	960.772	0.408135	0.344364	1.18518	0.235945	0.999991
213	NC_005120.4	-	136792641	136792630	136792661	Igsf1	rna69583	gene38641	protein_coding	c	889.712	845.302	888.196	1101.34	1061.76	1338.53	1058.81	695.103	984.844	0.157725	0.301568	0.523016	0.600963	0.999991
214	NC_005110.4	+	34739984	34739967	34740302	Ttc3	rna47318	gene25910	protein_coding	o	645.438	978.241	1049.75	896.633	701.63	1102.71	928.92	1145.96	931.16	0.118884	0.304761	0.390089	0.696471	0.999991
215	NC_005101.4	+	119153402	119153387	119153815	Ndufb5	rna10587	gene5954	protein_coding	o	1523.23	798.975	1002.24	1066.62	1352.34	873.532	905.303	812.618	1041.86	-0.154025	0.325977	-0.472501	0.636569	0.999991
216	NC_005102.4	+	123107529	123107465	123107803	Oxt	rna17061	gene9742	protein_coding	o	421.024	701.621	888.927	371.103	870.518	1673.99	1161.15	1064.54	894.11	0.999448	0.379411	2.63421	0.00843327	0.999991
217	NC_005109.4	-	74014608	74014555	74014687	Cltc	rna44875	gene24651	protein_coding	c	655.368	1044.71	724.446	878.676	891.629	1456.11	711.45	1014.62	922.126	0.302071	0.329989	0.9154	0.359982	0.999991
218	NC_005119.4	+	13829628	13829571	13829966	Ddt	rna66814	gene36747	protein_coding	o	1656.29	931.243	818.018	808.047	1404.5	825.039	651.425	1140.58	1029.39	-0.0660956	0.375758	-0.175899	0.860373	0.999991
219	NC_005103.4	+	167222004	167221958	167222276	Smim10l1	rna22663	gene12857	protein_coding	e	1499.4	899.015	780.004	766.148	1616.85	668.933	805.916	1128.29	1020.57	0.0982232	0.383872	0.255875	0.798048	0.999991
220	NC_005108.4	+	87046108	87046086	87046517	NEWGENE_1305560	rna40915	gene22597	protein_coding	i	2706.87	785.547	799.011	1047.47	1202.08	615.79	785.252	924.756	1108.35	-0.596422	0.448991	-1.32836	0.184059	0.999991
221	NC_005104.4	-	97538025	97538025	97538025	-	-	-	-	u	2434.79	1161.54	1198.15	1047.47	1279.08	605.826	764.587	153.614	1080.63	-1.05957	0.530892	-1.99584	0.0459519	0.999991
222	NC_005103.4	-	153351432	153351423	153351457	Atp6v1e1	rna22036	gene12501	protein_coding	o	468.688	1113.87	722.984	1007.96	561.304	1149.87	960.408	1152.87	892.245	0.206032	0.378224	0.544735	0.585936	0.999991
223	NC_005104.4	-	168140274	168140194	168140279	Camta1	rna27001	gene15166	protein_coding	c	1314.71	828.517	706.902	820.018	1244.31	841.646	1068.65	1132.9	994.706	0.226037	0.311982	0.724518	0.468747	0.999991
224	NC_005116.4	+	7800435	7800360	7800780	-	-	-	-	u	1165.76	715.721	702.516	967.262	1184.7	1107.36	962.376	1021.53	978.403	0.270038	0.290455	0.929705	0.352524	0.999991
225	NC_005100.4	+	225174001	225173981	225174436	Eef1g	rna7534	gene4140	protein_coding	o	438.898	1342.82	632.337	827.2	654.44	1452.79	624.856	920.147	861.685	0.171289	0.425779	0.402296	0.687466	0.999991
226	NC_005120.4	+	114822876	114822873	114822883	Pak3	rna69239	gene38417	protein_coding	i	232.358	757.348	383.788	1644.82	1524.96	662.954	1544.92	1032.29	972.929	0.657967	0.540107	1.21822	0.223141	0.999991
227	NC_005109.4	-	85721393	85721361	85721409	Rpl23	rna45372	gene24886	protein_coding	o	599.761	881.558	777.08	735.023	690.453	1385.69	670.121	1253.49	874.148	0.417815	0.347391	1.20272	0.229084	0.999991
228	NC_005107.4	+	118159939	118159913	118160396	Map4	rna38110	gene21272	protein_coding	o	802.329	1011.14	875.038	730.235	956.203	1211.65	745.891	897.105	903.699	0.156166	0.284812	0.548313	0.583477	0.999991
229	NC_005107.4	+	117691076	117691063	117691355	Uqcrc1	rna38053	gene21252	protein_coding	o	633.523	1237.4	759.536	432.155	701.63	1218.96	437.891	1381.76	850.357	0.287779	0.446388	0.644683	0.519133	0.999991
230	NC_005115.4	+	762094	762069	762469	Rps24	rna57854	gene31726	protein_coding	o	935.389	842.617	619.91	1346.74	972.347	916.71	1160.17	887.889	960.221	0.0729745	0.320416	0.227749	0.819841	0.999991
231	NC_005105.4	+	127334433	127334405	127334743	Ifi27	rna29832	gene16674	protein_coding	o	1360.39	882.23	771.232	829.595	1500.12	761.268	740.971	1007.71	981.689	0.0620663	0.351941	0.176354	0.860016	0.999991
232	NC_005102.4	+	146629508	146629478	146629715	Pygb	rna17572	gene10026	protein_coding	o	1402.09	742.577	894.044	1027.12	1467.83	678.233	973.201	806.473	998.946	-0.0499339	0.354445	-0.140879	0.887965	0.999991
233	NC_005100.4	-	89345504	89345487	89345531	Mag	rna2822	gene1690	protein_coding	c	951.277	966.827	1123.59	906.209	1156.14	793.154	760.651	774.214	929.007	-0.181441	0.278141	-0.652335	0.514185	0.999991
234	NC_005106.4	+	133588311	133588117	133588561	Cntn1	rna34102	gene19132	protein_coding	o	1696.01	682.15	815.094	1064.23	1454.17	784.518	1021.42	622.136	1017.47	-0.132056	0.397666	-0.332078	0.73983	0.999991
235	NC_005102.4	+	175630214	175630179	175630595	Rps21	rna18754	gene10611	protein_coding	o	1161.79	842.617	915.975	945.714	1347.38	570.619	1046.02	886.352	964.558	-0.00588615	0.333609	-0.0176439	0.985923	0.999991
236	NC_005114.4	+	46337617	46337588	46337946	Ctsb	rna56938	gene31203	protein_coding	o	359.459	1183.02	625.027	823.609	931.367	1181.76	635.68	1058.4	849.79	0.346323	0.399902	0.866019	0.38648	0.999991
237	NC_005118.4	-	24584433	24584429	24584511	Scoc	rna64402	gene35398	protein_coding	c	528.266	956.085	657.192	894.238	622.153	1484.67	853.15	843.341	854.887	0.324761	0.365306	0.88901	0.373998	0.999991
238	NC_005118.4	+	25069149	25069126	25069477	Adgrl1	rna64430	gene35415	protein_coding	o	1578.84	784.876	554.117	749.389	1813.06	934.646	626.824	900.946	992.837	0.222714	0.435757	0.511096	0.609284	0.999991
239	NC_005101.4	+	76366086	76366080	76366505	-	-	-	-	u	1950.22	710.349	1728.14	1092.96	1022.02	587.226	725.226	195.858	1001.5	-1.11558	0.488395	-2.28416	0.0223618	0.999991
240	NC_005103.4	+	122798353	122798329	122798713	Hdac11	rna21382	gene12209	protein_coding	o	935.389	835.903	788.777	812.835	981.04	1026.32	783.284	1076.07	904.951	0.198165	0.256061	0.773899	0.43899	0.999991
241	NC_005109.4	+	108413000	108412952	108413497	Gaa	rna46649	gene25490	protein_coding	o	1106.18	711.692	922.554	902.618	1080.39	1282.73	681.929	674.365	920.307	0.0310429	0.331579	0.0936213	0.92541	0.999991
242	NC_005100.4	+	100346039	100346016	100346545	RGD1309036	rna3269	gene1920	protein_coding	x	1541.11	704.978	1097.27	860.719	1094.05	775.882	690.786	914.771	959.945	-0.273302	0.339648	-0.804662	0.421015	0.999991
243	NC_005102.4	-	81295021	81295013	81295041	Mapk8ip1	rna16068	gene9174	protein_coding	o	601.747	947.356	1152.1	1057.04	486.794	1459.43	616.984	451.625	846.635	-0.318008	0.431814	-0.736447	0.461459	0.999991
244	NC_005114.4	-	33569824	33569805	33569851	Slc22a17	rna56439	gene30922	protein_coding	o	345.558	1078.95	790.239	729.038	478.102	1428.21	650.441	995.418	811.994	0.269946	0.440708	0.612527	0.540189	0.999991
245	NC_005113.4	-	82039228	82039223	82039259	-	-	-	-	u	1251.16	909.757	701.785	758.965	1291.5	961.881	522.517	1041.5	929.883	0.0770023	0.361777	0.212845	0.831448	0.999991
246	NC_005105.4	+	132590249	132590233	132590576	Evl	rna29976	gene16755	protein_coding	o	1030.72	794.947	1006.62	805.653	909.014	984.467	809.853	893.265	904.317	-0.0155721	0.257114	-0.060565	0.951706	0.999991
247	NC_005100.4	+	225126613	225126559	225127011	B3gat3	rna7527	gene4135	protein_coding	o	1799.28	755.334	983.229	385.468	906.53	980.481	383.77	1234.29	928.548	-0.161167	0.487403	-0.330664	0.740899	0.999991
248	NC_005120.4	+	106363458	106363406	106363814	Gprasp2	rna69079	gene38302	protein_coding	o	732.821	784.876	771.963	788.893	736.401	1003.07	945.648	1202.03	870.712	0.336787	0.270834	1.24352	0.213676	0.999991
249	NC_005106.4	-	2972903	2972885	2972930	Rpl41	rna30668	gene17218	protein_coding	o	478.617	1011.14	760.998	757.768	568.755	1342.52	606.159	1045.34	821.412	0.243202	0.386559	0.629145	0.529254	0.999991
250	NC_005106.4	-	129949990	129949973	129949999	Mlc1	rna33965	gene19074	protein_coding	o	540.182	770.776	921.092	1092.96	596.075	1026.32	975.169	966.232	861.1	0.0994792	0.334668	0.297247	0.766278	0.999991
251	NC_005120.4	+	1379205	1379172	1379493	Syn1	rna67597	gene37221	protein_coding	o	1155.83	855.373	925.478	942.123	1195.88	699.49	816.741	834.124	928.129	-0.129111	0.291813	-0.442446	0.658167	0.999991
252	NC_005109.4	-	109518431	109518422	109518431	Actg1	rna46711	gene25521	protein_coding	c	869.852	778.162	1035.86	993.598	839.472	644.354	998.785	1006.94	895.878	-0.0759935	0.283921	-0.267657	0.788963	0.999991
253	NC_005102.4	+	2271002	2270980	2271292	Nsmf	rna13791	gene7762	protein_coding	o	1112.14	812.403	587.014	976.839	1645.41	815.739	845.277	737.347	941.522	0.213649	0.368889	0.579171	0.562474	0.999991
254	NC_005100.4	-	64172468	64172448	64172500	Ndufa3	rna1306	gene828	protein_coding	o	434.926	1044.71	878.693	859.522	573.722	1108.69	778.364	870.991	818.702	0.0488754	0.361936	0.135039	0.892581	0.999991
255	NC_005103.4	-	119910468	119910458	119910485	Rab7a	rna21303	gene12147	protein_coding	c	969.15	799.647	829.714	852.34	972.347	888.81	950.568	867.151	891.216	0.0931827	0.241387	0.386031	0.699474	0.999991
256	NC_005109.4	+	13796724	13796697	13797076	Rnps1	rna42292	gene23286	protein_coding	o	1306.76	664.694	899.893	901.421	1604.43	707.461	966.313	583.733	954.339	0.0340801	0.391589	0.0870303	0.930647	0.999991
257	NC_005101.4	-	175195389	175195328	175195407	Fstl5	rna11289	gene6411	protein_coding	i	1328.61	831.874	945.216	1186.33	1496.4	511.498	1170.99	283.418	969.292	-0.310257	0.477525	-0.649718	0.515875	0.999991
258	NC_005109.4	-	56271256	56271249	56271276	Eif4a1	rna43905	gene24133	protein_coding	o	1370.32	781.519	720.791	970.853	1410.71	774.554	807.885	721.217	944.731	-0.0483476	0.355057	-0.136169	0.891688	0.999991
259	NC_005109.4	+	88497360	88497335	88497670	Cnp	rna45618	gene25022	protein_coding	o	1233.28	852.016	859.686	803.258	1279.08	1112.67	451.667	604.471	899.517	-0.119893	0.389206	-0.308044	0.758049	0.999991
260	NC_005102.4	+	2668764	2668752	2669023	Abca2	rna13890	gene7795	protein_coding	o	1036.67	850.002	857.493	1098.94	1231.89	828.361	746.875	604.471	906.838	-0.171974	0.315871	-0.544444	0.586136	0.999991
261	NC_005108.4	-	10334107	10334036	10334125	Ndufa11	rna38966	gene21689	protein_coding	o	1126.04	686.179	882.348	809.244	1300.19	772.561	769.508	912.467	907.317	0.100573	0.314446	0.319843	0.749088	0.999991
262	NC_005111.4	+	25109808	25109793	25110200	Eif4h	rna49813	gene27302	protein_coding	o	337.614	1002.41	838.486	750.586	418.494	1007.72	1057.83	982.361	799.437	0.241527	0.420085	0.574948	0.565327	0.999991
263	NC_005108.4	+	102375452	102375376	102375855	-	-	-	-	u	746.722	877.53	1179.88	978.036	683.002	1612.88	330.632	148.237	819.614	-0.446719	0.568588	-0.785664	0.432065	0.999991
264	NC_005102.4	+	8599263	8599229	8599628	Sptan1	rna14293	gene7967	protein_coding	o	526.28	899.015	972.264	893.041	461.958	936.639	978.121	879.44	818.345	-0.0160495	0.351923	-0.045605	0.963625	0.999991
265	NC_005106.4	-	143721095	143721084	143721128	Spryd3	rna34578	gene19379	protein_coding	c	895.67	826.503	799.011	900.224	956.203	860.91	822.645	870.223	866.424	0.0372967	0.238921	0.156105	0.87595	0.999991
266	NC_005106.4	+	98819416	98819396	98819797	Ndufb9	rna32845	gene18585	protein_coding	o	1376.27	835.231	821.673	835.58	1223.2	890.139	723.258	561.459	908.351	-0.186278	0.350038	-0.532165	0.594612	0.999991
267	NC_005107.4	+	128806920	128806906	128807111	Rpsa	rna38533	gene21445	protein_coding	e	893.684	600.91	1070.95	879.873	649.473	835.003	1075.54	859.47	858.113	-0.0103054	0.30978	-0.0332668	0.973462	0.999991
268	NC_005111.4	-	19159465	19159444	19159536	Rpl31l4	gene27105	gene27105	pseudogene	c	981.066	725.12	565.814	630.875	488.036	1000.41	544.166	1688.22	827.963	0.359897	0.431128	0.83478	0.403842	0.999991
269	NC_005103.4	-	140190450	140190447	140190452	Sumf1	rna21613	gene12335	protein_coding	i	663.312	692.221	1668.93	863.114	504.18	1543.79	291.271	84.4877	788.914	-0.681518	0.647479	-1.05257	0.292537	0.999991
270	NC_005109.4	+	40255427	40255411	40255801	Gpx3	rna43209	gene23755	protein_coding	o	1084.34	690.207	545.345	623.692	1347.38	763.261	591.399	1374.84	877.558	0.471474	0.385632	1.2226	0.22148	0.999991
271	NC_005100.4	-	264298668	264298591	264298684	Ndufb8	rna8559	gene4733	protein_coding	o	689.13	852.688	886.003	695.519	707.839	827.696	591.399	1251.95	812.778	0.113123	0.324651	0.348445	0.727506	0.999991
272	NC_005105.4	-	94951017	94951002	94951033	Rtn1	rna29017	gene16235	protein_coding	o	387.263	809.718	1066.57	769.739	343.985	993.767	830.517	997.723	774.91	0.0608578	0.425377	0.143068	0.886237	0.999991
273	NC_005111.4	+	22732915	22732905	22733112	Znhit1	rna49688	gene27242	protein_coding	o	1463.66	713.706	584.821	690.73	1767.11	553.347	556.958	1089.12	927.432	0.201108	0.461125	0.436124	0.662746	0.999991
274	NC_005106.4	+	117411956	117411934	117412139	Cyc1	rna33277	gene18775	protein_coding	o	695.087	822.474	956.182	978.036	548.886	1086.1	916.127	529.968	816.608	-0.16399	0.339843	-0.482546	0.629418	0.999991
275	NC_001665.2	+	9809	9644	10079	Trnr	rna70611	gene39525	tRNA	=	232.358	1097.08	504.408	697.913	623.395	1320.59	693.738	904.786	759.284	0.482906	0.45899	1.0521	0.292752	0.999991
276	NC_005110.4	+	83977494	83977461	83977849	Ece2	rna48472	gene26555	protein_coding	i	474.645	946.013	717.136	666.788	920.19	1034.95	601.239	995.418	794.548	0.338856	0.330557	1.02511	0.305313	0.999991
277	NC_005106.4	+	12175836	12175671	12176136	Uqcr11	rna31080	gene17546	protein_coding	o	558.056	838.588	793.163	814.032	537.709	1194.38	654.377	897.105	785.926	0.128224	0.341413	0.37557	0.707237	0.999991
278	NC_005115.4	+	20695681	20695651	20695928	Tmem59l	rna58663	gene32099	protein_coding	o	792.4	950.713	712.019	616.51	1303.91	792.489	581.559	913.235	832.855	0.224607	0.335499	0.669471	0.503195	0.999991
279	NC_005109.4	-	84697380	84697362	84697410	Nfe2l1	rna45298	gene24844	protein_coding	c	1163.77	875.516	501.484	426.17	1754.7	639.04	416.243	1222.77	874.961	0.443444	0.487822	0.909027	0.363336	0.999991
280	NC_005109.4	+	40450932	40450908	40451212	Gm2a	rna43226	gene23761	protein_coding	o	901.628	700.278	797.549	736.22	863.067	941.289	671.105	1013.08	828.027	0.155279	0.272338	0.57017	0.568562	0.999991
281	NC_005107.4	+	52191564	52191548	52191817	Cadm1	rna36116	gene20320	protein_coding	i	776.512	637.166	761.729	820.018	930.125	823.711	1016.5	930.9	837.082	0.305807	0.251276	1.21701	0.223599	0.999991
282	NC_005103.4	-	6950363	6950338	6950392	Nub1	rna19106	gene10803	protein_coding	p	742.751	858.73	570.2	573.414	1085.35	965.203	590.415	1106.79	811.607	0.449259	0.322317	1.39384	0.163365	0.999991
283	NC_005107.4	-	11473201	11473201	11473204	-	-	-	-	u	379.319	1188.39	1108.97	742.206	659.408	763.261	845.277	476.203	770.379	-0.319388	0.398551	-0.801372	0.422917	0.999991
284	NC_005106.4	+	35163186	35163173	35163501	Ndufa12	rna31852	gene18001	protein_coding	o	609.691	715.721	1208.39	1031.91	578.689	525.448	927.936	893.265	811.38	-0.286581	0.353069	-0.811683	0.416973	0.999991
285	NC_005107.4	-	116371176	116371146	116371199	Gnai2	rna37912	gene21191	protein_coding	c	939.361	797.632	717.867	701.504	1194.63	549.362	685.865	1178.99	845.652	0.193516	0.345221	0.560557	0.5751	0.999991
286	NC_005106.4	+	28656524	28656482	28656892	Pmch	rna31680	gene17924	protein_coding	o	333.642	839.26	656.461	676.365	560.062	1260.81	798.044	906.322	753.871	0.490864	0.381142	1.28788	0.197789	0.999991
287	NC_005109.4	+	88967737	88967712	88968116	Atp6v0a1	rna45652	gene25038	protein_coding	o	659.34	929.9	816.556	731.432	717.773	1052.22	624.856	724.29	782.046	-0.00901506	0.295229	-0.0305358	0.97564	0.999991
288	NC_005116.4	-	9233471	9233413	9233471	LOC100360522	rna60202	gene32973	protein_coding	p	669.27	1096.41	395.485	673.971	745.093	1230.92	631.744	778.823	777.714	0.256439	0.383589	0.668527	0.503797	0.999991
289	NC_005107.4	+	3690607	3690600	3690844	LOC292518	gene19493	gene19493	pseudogene	p	1207.47	550.554	842.142	943.32	1322.54	576.597	860.038	771.91	884.321	-0.00431274	0.369909	-0.0116589	0.990698	0.999991
290	NC_005102.4	+	79882323	79882309	79882603	Psmc3	rna15966	gene9140	protein_coding	o	677.214	704.978	910.127	890.647	732.675	940.624	805.916	745.796	800.997	0.0185219	0.267387	0.0692699	0.944775	0.999991
291	NC_005120.4	+	122811792	122811730	122812114	Zcchc12	rna69359	gene38491	protein_coding	o	824.175	704.978	813.632	986.416	835.747	891.467	1109	482.348	830.97	-0.00455742	0.329707	-0.0138227	0.988971	0.999991
292	NC_005108.4	-	82415603	82415592	82415681	Tuba4a	rna40785	gene22540	protein_coding	c	663.312	749.962	1184.99	787.696	542.676	845.632	720.306	739.651	779.279	-0.250129	0.31128	-0.80355	0.421657	0.999991
293	NC_005105.4	+	133687535	133687477	133687931	RGD1566401	rna30021	gene16774	lncRNA	i	824.175	702.292	872.114	878.676	731.433	890.139	766.555	766.534	803.99	-0.0542301	0.250509	-0.21648	0.828614	0.999991
294	NC_005111.4	+	7911530	7911476	7912004	Ubl3	rna49085	gene26879	protein_coding	o	689.13	691.55	667.426	980.43	926.4	860.246	992.881	706.624	814.336	0.202879	0.282074	0.71924	0.471993	0.999991
295	NC_005101.4	+	187596347	187596324	187596709	LOC100911992	rna11590	gene6565	lncRNA	o	697.073	800.318	804.128	756.571	656.924	844.303	687.833	999.259	780.801	0.0601454	0.272197	0.220963	0.825121	0.999991
296	NC_005106.4	-	12401206	12401197	12401230	Cirbp	rna31142	gene17567	protein_coding	c	657.354	754.662	562.159	794.879	753.786	933.981	798.044	1043.04	787.238	0.350356	0.274788	1.27501	0.202307	0.999991
297	NC_005116.4	-	70299179	70299171	70299210	Gdi2	rna61774	gene33893	protein_coding	c	587.845	746.605	606.02	828.398	668.1	1023	753.763	976.217	773.743	0.305291	0.291357	1.04783	0.294719	0.999991
298	NC_005106.4	+	120903685	120903666	120904079	Tomm22	rna33604	gene18902	protein_coding	o	1050.57	774.805	535.842	793.681	1195.88	785.846	710.466	831.819	834.864	0.160937	0.32621	0.493356	0.621761	0.999991
299	NC_005119.4	+	41085881	41085862	41086126	Tspyl1	rna67334	gene37056	protein_coding	o	957.235	772.119	698.129	751.783	923.916	839.653	810.837	705.856	807.441	0.0463348	0.262202	0.176714	0.859733	0.999991
300	NC_005105.4	-	26130275	26130269	26130300	Mrpl33	rna27843	gene15565	protein_coding	o	488.547	975.555	602.365	667.985	656.924	1228.92	772.46	549.938	742.837	0.229449	0.365861	0.627147	0.530563	0.999991
301	NC_005104.4	-	136020940	136020924	136020966	Rps8	rna25448	gene14430	protein_coding	o	355.488	876.187	839.217	878.676	435.88	985.131	789.188	718.913	734.835	-0.0112274	0.390187	-0.0287743	0.977045	0.999991
302	NC_005106.4	+	123581927	123581887	123582192	Smdt1	rna33755	gene18983	protein_coding	o	389.249	930.571	638.916	579.399	655.682	895.453	581.559	1170.54	730.171	0.378321	0.371666	1.01791	0.308722	0.999991
303	NC_005106.4	-	12282138	12282118	12282148	Rps15	rna31118	gene17556	protein_coding	o	1128.03	638.509	782.197	609.327	1040.65	963.21	444.779	811.082	802.222	0.0472238	0.36617	0.128967	0.897384	0.999991
304	NC_005102.4	+	150782499	150782464	150782924	Dynlrb1	rna17815	gene10158	protein_coding	o	623.593	662.679	603.827	902.618	817.119	1129.28	770.492	667.453	772.133	0.277589	0.303432	0.914832	0.36028	0.999991
305	NC_005116.4	+	31498657	31498625	31499160	LOC108348176	rna60880	gene33332	transcribed_pseudogene	o	419.038	768.762	516.835	709.884	516.598	1204.34	752.779	950.87	729.889	0.503563	0.361546	1.3928	0.163679	0.999991
306	NC_005108.4	+	92894267	92894243	92894609	Cab39	rna41059	gene22657	protein_coding	c	909.572	524.369	954.719	909.801	881.694	754.625	980.089	568.372	810.405	-0.0502191	0.326085	-0.154006	0.877605	0.999991
307	NC_005100.4	+	238852570	238852545	238852895	Zfand5	rna7908	gene4392	protein_coding	c	1217.4	690.207	577.51	695.519	1408.23	561.983	842.325	768.07	845.155	0.172	0.38538	0.446313	0.655371	0.999991
308	NC_005106.4	-	123183502	123183481	123183531	Pmm1	rna33717	gene18962	protein_coding	o	889.712	720.42	653.537	707.49	926.4	754.625	658.313	991.578	787.759	0.166247	0.27978	0.594207	0.552374	0.999991
309	NC_005120.4	-	11137039	11136949	11137059	Atp6ap2	rna67707	gene37309	protein_coding	p	504.435	713.706	626.489	943.32	526.533	957.231	1052.91	710.464	754.386	0.219614	0.343663	0.63904	0.522797	0.999991
310	NC_005113.4	+	106340041	106340017	106340199	-	-	-	-	u	1104.2	709.007	846.528	925.363	1348.62	283.649	929.904	619.064	845.791	-0.17279	0.440216	-0.392512	0.69468	0.999991
311	NC_005109.4	-	14618609	14618605	14618636	Ube2i	rna42461	gene23342	protein_coding	o	859.922	770.105	635.992	662	778.623	842.31	616.984	978.521	768.057	0.137042	0.282219	0.485588	0.62726	0.999991
312	NC_005102.4	+	155107858	155107785	155108208	Slc32a1	rna18074	gene10258	protein_coding	o	1096.25	852.016	516.835	535.107	1388.36	720.747	515.629	840.268	808.151	0.208562	0.401833	0.519028	0.603741	0.999991
313	NC_005112.4	-	90651689	90651669	90651719	Atp1a2	rna52438	gene28633	protein_coding	o	254.203	948.028	687.895	743.403	473.134	1019.01	754.747	766.534	705.869	0.192667	0.422489	0.456027	0.64837	0.999991
314	NC_005100.4	+	219443576	219443548	219443894	Ppp1ca	rna7056	gene3916	protein_coding	o	564.014	829.189	732.488	635.663	488.036	971.181	650.441	907.858	722.359	0.127633	0.325252	0.392412	0.694754	0.999991
315	NC_005111.4	-	22750490	22750484	22750512	Fis1	rna49694	gene27244	protein_coding	c	577.916	819.117	686.433	617.707	603.526	1061.52	404.434	980.825	718.935	0.175293	0.366719	0.478004	0.632647	0.999991
316	NC_005120.4	-	107394478	107394467	107394511	Morf4l2	rna69123	gene38329	protein_coding	c	693.101	725.12	663.771	791.287	700.388	1019.67	916.127	535.345	755.602	0.142766	0.303145	0.47095	0.637676	0.999991
317	NC_005101.4	-	197939984	197939972	197940008	-	-	-	-	u	1036.67	584.796	617.717	644.043	1131.3	503.526	676.025	1215.09	801.146	0.291789	0.378605	0.770695	0.440888	0.999991
318	NC_005104.4	-	136718355	136718342	136718375	Atp6v0b	rna25494	gene14443	protein_coding	o	1062.49	683.493	805.59	535.107	646.99	891.467	508.741	941.653	759.441	-0.0444405	0.343768	-0.129275	0.89714	0.999991
319	NC_005103.4	-	159253933	159253902	159253964	Kcna6	rna22324	gene12643	protein_coding	o	927.445	763.391	625.027	569.823	1026.99	815.075	500.869	928.596	769.652	0.182091	0.332573	0.547521	0.584021	0.999991
320	NC_005101.4	+	151793490	151793478	151793838	-	-	-	-	u	1183.63	762.048	563.621	1043.88	1048.1	493.562	786.236	712.001	824.135	-0.22429	0.360517	-0.622133	0.533854	0.999991
321	NC_005105.4	+	124227764	124227726	124228160	-	-	-	-	u	466.702	823.817	777.811	654.817	378.756	873.532	805.916	897.105	709.807	0.117159	0.36342	0.322379	0.747166	0.999991
322	NC_005102.4	+	160399796	160399777	160400154	Ywhab	rna18238	gene10337	protein_coding	o	663.312	644.551	738.336	809.244	601.042	722.74	914.159	917.843	751.403	0.144577	0.279324	0.517595	0.604741	0.999991
323	NC_005102.4	+	154869449	154869427	154869681	Snhg11	rna18057	gene10252	protein_coding	c	687.144	890.958	735.412	793.681	818.361	788.504	809.853	500.781	753.087	-0.092156	0.288772	-0.319131	0.749627	0.999991
324	NC_005108.4	-	16610312	16610278	16610324	Mea1	rna39268	gene21838	protein_coding	o	969.15	685.507	755.881	691.927	984.765	690.19	681.929	774.982	779.292	0.0145864	0.282851	0.0515692	0.958872	0.999991
325	NC_005101.4	-	219355045	219354949	219355047	Cdc14a	rna12880	gene7253	protein_coding	i	558.056	557.94	633.068	1144.43	918.949	440.419	1162.13	867.919	785.365	0.227741	0.39497	0.576604	0.564207	0.999991
326	NC_005109.4	+	72283230	72283208	72283439	Rpl37a-ps3	gene24630	gene24630	pseudogene	o	645.438	903.043	525.607	505.179	495.487	898.11	280.447	1376.38	703.712	0.242445	0.466301	0.519932	0.603111	0.999991
327	NC_005104.4	-	156677152	156677126	156677207	Pink1	rna26507	gene14907	protein_coding	o	641.466	755.334	665.964	790.09	655.682	848.953	688.817	801.865	731.022	0.0703683	0.257399	0.273382	0.78456	0.999991
328	NC_005109.4	-	38780156	38780145	38780174	Uqcrq	rna43135	gene23725	protein_coding	c	601.747	908.415	659.385	865.508	633.329	791.825	776.396	598.326	729.366	-0.117361	0.2857	-0.410782	0.681232	0.999991
329	NC_005119.4	+	19359066	19358715	19359312	Phyhipl	rna66885	gene36798	protein_coding	o	792.4	727.135	641.109	739.812	974.831	698.161	776.396	671.293	752.642	0.10562	0.267486	0.394863	0.692944	0.999991
330	NC_005101.4	-	30125509	30125476	30125596	Cartpt	rna9469	gene5240	protein_coding	c	587.845	604.267	513.911	652.423	531.5	1028.97	863.974	903.25	710.768	0.497915	0.303527	1.64043	0.100915	0.999991
331	NC_005113.4	+	83754980	83754948	83755363	Selm	rna54875	gene29940	protein_coding	o	452.8	685.507	907.203	811.638	540.193	1004.4	761.635	421.67	698.13	-0.0677761	0.373231	-0.181593	0.855902	0.999991
332	NC_005100.4	-	31866755	31866746	31866780	Tppp	rna544	gene363	protein_coding	o	413.081	766.076	500.753	605.736	465.683	1106.03	609.111	950.102	677.072	0.453368	0.370692	1.22303	0.221318	0.999991
333	NC_005119.4	+	2098434	2098412	2098785	Ppp1r11	rna65877	gene36220	protein_coding	o	889.712	590.839	630.875	669.182	957.445	587.226	660.281	1042.27	753.479	0.225293	0.317321	0.709986	0.477713	0.999991
334	NC_005117.4	-	41434014	41433997	41434055	LOC108348784	gene34602	gene34602	pseudogene	c	528.266	709.678	508.794	605.736	396.141	1118.65	578.607	1004.64	681.314	0.39774	0.379625	1.04772	0.294769	0.999991
335	NC_005106.4	-	70513363	70513353	70513387	-	-	-	-	u	494.505	955.413	364.051	714.672	900.321	1126.62	381.802	643.642	697.629	0.270983	0.425373	0.637048	0.524094	0.999991
336	NC_005102.4	-	126908676	126908675	126908676	-	-	-	-	u	150.933	1266.95	532.918	566.231	337.776	736.025	797.06	806.473	649.295	0.0872492	0.531095	0.164282	0.869509	0.999991
337	NC_005100.4	-	192047889	192047867	192047901	Ndufab1	rna5757	gene3317	protein_coding	o	321.726	741.906	586.283	863.114	561.304	1161.17	739.987	487.724	682.901	0.230301	0.40618	0.566991	0.57072	0.999991
338	NC_005104.4	-	171456307	171456264	171456321	Tprg1l	rna27115	gene15210	protein_coding	o	754.666	745.263	661.578	451.309	679.277	674.911	453.636	1190.51	701.393	0.199171	0.367501	0.541961	0.587846	0.999991
339	NC_005100.4	-	222232352	222232335	222232381	Fkbp2	rna7399	gene4070	protein_coding	o	990.996	727.135	671.813	665.591	976.072	624.426	547.118	768.838	746.499	-0.0662653	0.311666	-0.212617	0.831626	0.999991
340	NC_005109.4	-	107339226	107339212	107339262	Timp2	rna46606	gene25471	protein_coding	c	687.144	732.506	638.916	623.692	540.193	799.132	619.936	936.277	697.224	0.11133	0.29033	0.383459	0.701379	0.999991
341	NC_005107.4	+	62309770	62309746	62310187	Cox5a	rna36506	gene20502	protein_coding	o	617.635	866.116	342.12	940.926	871.759	985.796	480.204	597.558	712.764	0.0854368	0.398462	0.214416	0.830222	0.999991
342	NC_005106.4	+	11538693	11538661	11538901	Sgta	rna30999	gene17510	protein_coding	o	716.933	690.207	849.452	869.099	736.401	896.117	710.466	258.839	715.939	-0.264954	0.389198	-0.68077	0.496017	0.999991
343	NC_005111.4	+	39894560	39894515	39894735	LOC102549705	rna50207	gene27496	lncRNA	i	260.161	770.776	636.723	826.003	769.93	761.268	529.405	856.398	676.333	0.224023	0.390181	0.574152	0.565865	0.999991
344	NC_005103.4	+	146292149	146292136	146292536	Slc6a1	rna21777	gene12395	protein_coding	o	591.817	1001.74	392.561	444.126	840.714	906.746	481.188	774.982	679.234	0.30493	0.384721	0.7926	0.428011	0.999991
345	NC_005112.4	-	91842314	91842281	91842358	Cadm3	rna52514	gene28684	protein_coding	o	798.358	662.679	819.48	670.38	812.152	642.361	592.383	685.118	710.364	-0.111238	0.262832	-0.423226	0.67213	0.999991
346	NC_005114.4	-	32868137	32868127	32868167	Dad1	rna56371	gene30888	protein_coding	o	879.782	548.54	553.386	629.678	1097.77	787.839	519.565	792.648	726.151	0.294042	0.333889	0.880656	0.378504	0.999991
347	NC_005118.4	+	24705406	24705345	24705583	Ndufb7	rna64407	gene35403	protein_coding	o	834.105	648.58	852.376	766.148	897.838	565.969	605.175	594.486	720.585	-0.22004	0.287876	-0.764356	0.444655	0.999991
348	NC_005104.4	+	128568172	128568152	128568511	Rab3b	rna25206	gene14309	protein_coding	o	996.954	530.412	656.461	653.62	1019.54	603.169	675.041	762.693	737.236	0.110855	0.325092	0.340997	0.733106	0.999991
349	NC_005102.4	-	143016932	143016925	143016951	Napb	rna17467	gene9945	protein_coding	p	530.252	867.459	540.959	591.371	495.487	692.183	803.948	834.124	669.473	0.158551	0.316849	0.500398	0.616795	0.999991
350	NC_005102.4	-	11823782	11823755	11823800	Stxbp1	rna14514	gene8062	protein_coding	o	560.042	813.075	762.46	769.739	499.213	890.803	752.779	341.791	673.738	-0.226308	0.361927	-0.625286	0.531783	0.999991
351	NC_005100.4	-	143167330	143167316	143167339	Rps17	rna4342	gene2444	protein_coding	o	295.909	794.275	636.723	518.347	384.965	836.332	687.833	939.349	636.717	0.341411	0.400342	0.852797	0.393772	0.999991
352	NC_005103.4	+	147189720	147189695	147190107	Syn2	rna21795	gene12406	protein_coding	i	413.081	782.19	629.413	752.98	489.278	730.711	718.338	778.055	661.756	0.0741707	0.32212	0.230258	0.817891	0.999991
353	NC_005101.4	-	95425376	95425336	95425430	Stmn2	rna10272	gene5778	protein_coding	c	573.944	690.879	684.971	523.135	807.185	586.562	497.917	1034.59	674.898	0.241874	0.326119	0.741672	0.458286	0.999991
354	NC_005115.4	-	64798787	64798758	64798818	Dusp26	rna59338	gene32511	protein_coding	o	536.21	689.536	481.015	575.808	784.832	836.332	675.041	809.545	673.54	0.443723	0.26465	1.67664	0.0936122	0.999991
355	NC_005112.4	-	51985699	51985668	51985725	Gpr37l1	rna51391	gene28112	protein_coding	o	601.747	771.447	532.918	588.976	568.755	826.368	607.143	798.792	662.018	0.167155	0.287219	0.581977	0.560582	0.999991
356	NC_005106.4	-	116928262	116928258	116928275	Eef1d	rna33172	gene18748	protein_coding	c	639.48	541.155	882.348	718.264	686.728	673.583	750.811	569.908	682.785	-0.0536823	0.282921	-0.189743	0.849511	0.999991
357	NC_005120.4	-	72074106	72074102	72074109	Rps4x	rna68700	gene37963	protein_coding	c	595.789	606.281	661.578	723.052	602.284	615.126	734.083	855.63	674.228	0.117998	0.267472	0.441159	0.659098	0.999991
358	NC_005102.4	+	152622050	152622016	152622297	Epb41l1	rna17941	gene10202	protein_coding	o	478.617	665.365	457.622	478.843	915.223	858.253	438.875	952.406	655.651	0.604369	0.338436	1.78577	0.0741364	0.999991
359	NC_005109.4	+	86611175	86611157	86611412	Psmd3	rna45452	gene24921	protein_coding	o	637.494	494.156	572.393	817.624	976.072	815.075	625.84	606.775	693.179	0.262516	0.310217	0.846235	0.397422	0.999991
360	NC_005113.4	+	78975162	78975141	78975451	Mrfap1	rna54565	gene29847	protein_coding	o	236.33	885.587	535.111	483.631	417.252	931.324	517.597	844.877	606.464	0.338728	0.436776	0.775518	0.438034	0.999991
361	NC_005107.4	+	55182547	55182527	55182792	Cryab	rna36235	gene20373	protein_coding	o	621.607	768.762	663.771	691.927	748.819	793.818	436.907	570.676	662.036	-0.107408	0.299743	-0.358334	0.720093	0.999991
362	NC_005106.4	+	120145904	120145885	120146265	Pdxp	rna33523	gene18876	protein_coding	o	651.396	615.681	665.233	633.269	988.491	798.468	584.511	489.26	678.289	0.156495	0.311381	0.502582	0.615258	0.999991
363	NC_005115.4	-	20845585	20845566	20845612	Gdf1	rna58674	gene32106	protein_coding	o	893.684	532.426	602.365	738.615	885.419	617.783	620.92	725.058	702.034	0.0440531	0.300054	0.146818	0.883276	0.999991
364	NC_005105.4	+	41923783	41923760	41924109	Ntsr2	rna28206	gene15763	protein_coding	o	510.393	782.861	683.509	657.211	768.688	583.904	646.504	644.41	659.685	0.00236164	0.273883	0.00862282	0.99312	0.999991
365	NC_005105.4	-	136142958	136142944	136142971	Ckb	rna30301	gene16876	protein_coding	o	623.593	682.822	864.072	803.258	643.264	546.705	745.891	460.842	671.306	-0.31291	0.289231	-1.08187	0.27931	0.999991
366	NC_005112.4	-	109990290	109990283	109990308	Nenf	rna52988	gene28932	protein_coding	o	899.642	449.843	884.541	606.933	952.478	683.547	356.217	629.049	682.781	-0.115506	0.385131	-0.299914	0.764243	0.999991
367	NC_005110.4	+	88881751	88881724	88882096	Dnm1l	rna48783	gene26699	protein_coding	c	848.007	501.542	565.814	730.235	1002.15	552.019	679.961	708.16	698.486	0.154724	0.322247	0.48014	0.631128	0.999991
368	NC_005100.4	-	266059331	266059321	266059345	Psd	rna8684	gene4776	protein_coding	o	464.716	655.294	661.578	594.962	491.762	790.496	487.092	855.63	625.191	0.142834	0.320791	0.445255	0.656135	0.999991
369	NC_005100.4	-	222677359	222677349	222677389	Rtn3	rna7451	gene4088	protein_coding	o	538.196	732.506	717.136	762.557	525.291	716.097	848.23	355.616	649.454	-0.170694	0.344138	-0.496005	0.619891	0.999991
370	NC_005113.4	-	78815635	78815624	78815652	LOC100911029	rna54559	gene29842	lncRNA	c	591.817	591.51	664.502	650.029	614.702	710.118	558.926	800.329	647.742	0.104032	0.261928	0.397178	0.691236	0.999991
371	NC_005100.4	-	216715361	216715347	216715379	Nap1l4	rna6852	gene3835	protein_coding	c	397.193	713.706	684.24	575.808	489.278	749.975	716.37	665.916	624.061	0.142802	0.311908	0.457834	0.647072	0.999991
372	NC_005100.4	-	162673360	162673360	162673362	-	-	-	-	u	2309.68	2.01422	682.778	1073.8	1752.21	210.578	2.95207	817.226	856.405	-0.547665	1.65868	-0.330182	0.741263	0.999991
373	NC_005107.4	+	48387270	48387231	48387733	Thy1	rna35897	gene20233	protein_coding	o	1022.77	516.984	869.92	796.076	741.368	547.369	461.508	581.429	692.178	-0.458208	0.321732	-1.42419	0.15439	0.999991
374	NC_005100.4	+	93242540	93242502	93242772	RGD1562402	rna3020	gene1780	transcribed_pseudogene	o	311.796	781.519	433.498	481.237	623.395	1020.34	431.987	760.389	605.52	0.496209	0.390631	1.27028	0.203986	0.999991
375	NC_005100.4	+	173541808	173541772	173542163	Eif3f	rna5327	gene3108	protein_coding	o	327.684	855.373	481.015	521.938	469.409	1062.19	453.636	622.905	599.268	0.253351	0.407739	0.621357	0.534365	0.999991
376	NC_005101.4	-	210803868	210803861	210803893	Gstm1	rna12729	gene7172	protein_coding	o	476.631	663.351	434.229	585.385	586.14	1092.75	383.77	707.392	616.205	0.359447	0.371415	0.967777	0.333156	0.999991
377	NC_005104.4	+	59509136	59509122	59509476	Clta	rna24043	gene13632	protein_coding	o	301.867	719.749	716.405	754.177	340.259	831.018	691.77	496.941	606.523	-0.0798873	0.402792	-0.198334	0.842784	0.999991
378	NC_005117.4	+	31468554	31468527	31468814	Rnf14	rna62853	gene34494	protein_coding	o	289.951	699.607	492.711	730.235	235.946	848.953	841.341	700.48	604.903	0.246816	0.450202	0.548233	0.583532	0.999991
379	NC_005108.4	+	82351571	82351543	82351870	Fam134a	rna40761	gene22533	protein_coding	o	492.519	711.692	644.765	544.683	717.773	747.982	638.632	539.185	629.654	0.140914	0.277646	0.507529	0.611784	0.999991
380	NC_005109.4	+	3570692	3570661	3571007	RGD1305733	rna41869	gene23056	protein_coding	o	524.295	689.536	660.116	624.889	507.905	648.34	682.913	691.263	628.657	0.0170397	0.265933	0.0640754	0.94891	0.999991
381	NC_005107.4	+	117118529	117118478	117118785	Gpx1	rna37976	gene21222	protein_coding	o	724.877	546.526	627.22	677.562	661.891	639.04	633.712	730.434	655.158	0.0507571	0.252333	0.201151	0.84058	0.999991
382	NC_005102.4	+	113417477	113417422	113417885	Serf2	rna16738	gene9561	protein_coding	c	440.884	583.453	560.697	735.023	653.199	898.11	581.559	569.908	627.854	0.219564	0.30573	0.718162	0.472657	0.999991
383	NC_005119.4	+	42969593	42969584	42969957	Marcks	rna67352	gene37067	protein_coding	c	923.473	546.526	659.385	586.582	1313.85	371.998	621.904	582.197	700.739	0.0896241	0.413968	0.2165	0.828598	0.999991
384	NC_005107.4	+	129243409	129243374	129243720	Rpl14	rna38562	gene21458	protein_coding	o	734.807	742.577	634.53	490.814	723.983	686.204	523.501	596.022	641.555	-0.0409511	0.283473	-0.144462	0.885136	0.999991
385	NC_005102.4	-	8909234	8909183	8909257	Sh3glb2	rna14342	gene7981	protein_coding	o	669.27	625.752	521.221	452.506	661.891	762.597	379.834	959.319	629.049	0.28591	0.349617	0.817781	0.413482	0.999991
386	NC_005108.4	-	91965866	91965857	91965893	Dner	rna41020	gene22644	protein_coding	o	430.954	686.85	470.049	584.188	439.605	900.767	743.923	618.296	609.329	0.314706	0.330819	0.951291	0.341457	0.999991
387	NC_005101.4	+	184981915	184981866	184982190	Fam160a1	rna11446	gene6508	protein_coding	i	885.74	735.191	622.834	585.385	532.742	803.782	319.808	608.311	636.724	-0.319179	0.349736	-0.912629	0.361438	0.999991
388	NC_005108.4	+	61571583	61571551	61571845	LOC367275	gene22291	gene22291	pseudogene	o	482.589	790.918	430.574	464.477	464.442	952.581	434.939	758.853	597.422	0.267676	0.373089	0.71746	0.47309	0.999991
389	NC_005109.4	-	82836761	82836735	82836774	Samd14	rna45186	gene24788	protein_coding	i	812.259	538.469	646.227	535.107	653.199	563.976	531.373	898.642	647.406	0.0661288	0.310148	0.213217	0.831158	0.999991
390	NC_005113.4	+	70178291	70178243	70178584	Qdpr	rna54408	gene29761	protein_coding	o	180.723	815.089	692.281	678.759	310.456	848.953	667.169	459.306	581.592	-0.0518527	0.474814	-0.109206	0.913039	0.999991
391	NC_005120.4	+	79196143	79196126	79196622	-	-	-	-	u	562.028	373.974	1103.85	1163.59	615.944	824.375	429.035	97.5448	646.292	-0.703945	0.559129	-1.259	0.20803	0.999991
392	NC_005105.4	-	102032276	102032264	102032290	Atp6v1d	rna29190	gene16327	protein_coding	c	325.698	670.065	629.413	651.226	321.632	810.425	692.754	669.757	596.371	0.130864	0.382156	0.342436	0.732023	0.999991
393	NC_005102.4	-	9095895	9095860	9095938	LOC100361008	rna14363	gene7988	transcribed_pseudogene	o	369.389	515.641	551.924	468.069	379.998	781.861	824.613	918.611	601.263	0.607756	0.348239	1.74523	0.0809456	0.999991
394	NC_005100.4	-	100859349	100859330	100859368	Ptov1	rna3364	gene1946	protein_coding	o	732.821	455.214	554.848	662	983.523	708.79	573.687	622.905	661.723	0.266008	0.312348	0.851641	0.394413	0.999991
395	NC_005114.4	-	57261008	57261003	57261015	Lcp1	rna57240	gene31353	protein_coding	i	683.172	593.524	335.541	1170.77	968.622	427.134	970.249	410.917	694.991	-0.00318042	0.455755	-0.00697835	0.994432	0.999991
396	NC_005106.4	+	11873987	11873978	11874318	Ap3d1	rna31050	gene17529	protein_coding	o	373.361	686.179	771.963	671.577	319.148	625.754	778.364	605.239	603.948	-0.105662	0.371842	-0.284158	0.77629	0.999991
397	NC_005102.4	+	143829314	143829238	143829598	LOC689130	rna17484	gene9961	protein_coding	o	190.653	575.396	403.526	439.338	530.258	1486	446.747	456.233	566.019	0.857648	0.47964	1.78811	0.0737587	0.999991
398	NC_005113.4	-	115315071	115315049	115315083	Erlec1	rna55541	gene30264	protein_coding	c	893.684	633.809	486.863	645.24	963.654	545.376	561.878	625.977	669.56	0.0212903	0.331177	0.0642868	0.948742	0.999991
399	NC_005100.4	-	84339272	84339256	84339299	Pld3	rna2407	gene1490	protein_coding	o	375.347	698.264	542.421	662	522.807	700.154	615.016	725.058	605.133	0.168221	0.308317	0.545611	0.585333	0.999991
400	NC_005106.4	+	121337717	121337690	121338103	-	-	-	-	u	464.716	667.379	696.667	556.654	373.789	649.668	687.833	720.449	602.145	0.0268078	0.321498	0.0833838	0.933546	0.999991
401	NC_005108.4	+	17848959	17848906	17849404	Tcte1	rna39391	gene21885	protein_coding	x	643.452	662.679	605.289	650.029	649.473	638.376	630.76	569.908	631.246	-0.0417849	0.238449	-0.175236	0.860894	0.999991
402	NC_005112.4	-	82737158	82737128	82737179	Atp1b1	rna52097	gene28456	protein_coding	o	379.319	787.561	658.654	560.246	412.285	850.946	694.722	373.282	589.627	-0.0348905	0.381342	-0.0914941	0.9271	0.999991
403	NC_005106.4	-	75574964	75574928	75574989	Ywhaz	rna32548	gene18406	protein_coding	c	744.737	655.294	751.494	591.371	548.886	549.362	648.472	557.619	630.904	-0.251063	0.253354	-0.990957	0.321707	0.999991
404	NC_005101.4	+	242184929	242184414	242185137	Ppp3ca	rna13262	gene7486	protein_coding	c	891.698	341.075	671.082	530.318	1594.5	399.898	764.587	417.83	701.374	0.384539	0.485888	0.791414	0.428702	0.999991
405	NC_005112.4	+	50153807	50153717	50154114	Atp2b4	rna51269	gene28059	protein_coding	o	643.452	611.652	554.848	770.936	796.008	479.612	716.37	603.703	647.073	0.00780301	0.291056	0.0268093	0.978612	0.999991
406	NC_005114.4	+	8190816	8190790	8191025	Rpl15	rna55772	gene30383	protein_coding	e	252.217	625.081	739.067	671.577	356.403	821.718	592.383	582.197	580.08	0.0386712	0.40535	0.095402	0.923996	0.999991
407	NC_005114.4	+	33759120	33759103	33759518	Thtpa	rna56470	gene30935	protein_coding	o	351.516	594.196	795.356	681.153	307.972	735.361	512.677	686.654	583.111	-0.111866	0.383524	-0.291678	0.770533	0.999991
408	NC_005103.4	-	64239156	64239147	64239193	Ptn	rna20006	gene11332	protein_coding	o	516.351	864.102	389.637	423.776	1092.8	476.955	414.275	794.184	621.51	0.339145	0.413626	0.819933	0.412254	0.999991
409	NC_005100.4	-	222451675	222451662	222451720	Otub1	rna7422	gene4080	protein_coding	o	697.073	558.611	751.494	683.548	751.303	566.633	534.326	537.649	635.08	-0.171445	0.273593	-0.626642	0.530894	0.999991
410	NC_005101.4	+	29076537	29076496	29076735	Tnpo1	rna9447	gene5224	protein_coding	x	992.982	598.896	720.791	667.985	596.075	443.077	461.508	713.537	649.356	-0.427028	0.311717	-1.36992	0.170711	0.999991
411	NC_005111.4	+	19306201	19306187	19306418	Cops6	rna49469	gene27115	protein_coding	o	859.922	615.009	712.019	574.611	846.923	491.569	549.086	530.736	647.485	-0.19138	0.309381	-0.61859	0.536186	0.999991
412	NC_005100.4	-	88897524	88897500	88897554	Aplp1	rna2724	gene1655	protein_coding	o	899.642	368.603	929.865	560.246	417.252	912.724	366.057	498.477	619.108	-0.327916	0.418459	-0.783627	0.433259	0.999991
413	NC_005100.4	-	220474491	220474472	220474501	Cnih2	rna7149	gene3972	protein_coding	o	613.663	548.54	557.042	654.817	531.5	686.204	622.888	718.145	616.6	0.1098	0.258074	0.425458	0.670503	0.999991
414	NC_005103.4	+	157645571	157645559	157645832	Chd4	rna22270	gene12617	protein_coding	o	726.863	558.611	532.918	526.727	705.355	626.419	360.153	930.132	620.897	0.162649	0.348344	0.466921	0.640557	0.999991
415	NC_005106.4	+	2742365	2742347	2742725	Cnpy2	rna30621	gene17204	protein_coding	o	917.515	440.443	540.959	667.985	967.38	556.005	576.639	623.673	661.325	0.087478	0.347274	0.251899	0.801119	0.999991
416	NC_005110.4	-	65060884	65060876	65060897	Gsk3b	rna47929	gene26259	protein_coding	o	975.108	503.556	361.858	615.313	936.334	536.076	680.945	708.928	664.765	0.223646	0.371602	0.601843	0.547279	0.999991
417	NC_005111.4	+	41149802	41149756	41150028	Rph3a	rna50270	gene27521	protein_coding	o	510.393	708.335	546.076	519.544	613.46	521.462	507.757	864.078	598.888	0.132925	0.304907	0.435952	0.662872	0.999991
418	NC_005120.4	-	42328786	42328773	42328802	LOC100361934	rna68334	gene37669	transcribed_pseudogene	o	403.151	692.893	535.842	565.034	437.122	644.354	585.495	811.082	584.371	0.172424	0.319165	0.540236	0.589035	0.999991
419	NC_005118.4	+	56229815	56229800	56230062	Tubb3	rna65580	gene35981	protein_coding	o	722.891	427.015	882.348	860.719	977.314	316.863	820.677	278.809	660.83	-0.274331	0.459247	-0.59735	0.550274	0.999991
420	NC_005105.4	-	43463893	43463880	43463916	Ywhaq	rna28251	gene15789	protein_coding	c	573.944	547.869	554.117	611.721	542.676	953.246	602.223	406.309	599.013	0.131561	0.330097	0.398552	0.690223	0.999991
421	NC_005104.4	-	57896829	57896813	57896855	Fam219a	rna23915	gene13564	protein_coding	o	345.558	612.324	614.062	600.947	340.259	676.24	754.747	678.206	577.793	0.171439	0.356274	0.4812	0.630374	0.999991
422	NC_005100.4	-	64374312	64374256	64374321	LOC103691003	rna1319	gene836	lncRNA	i	530.252	541.826	654.268	724.249	632.088	421.155	832.485	602.167	617.311	0.0206066	0.311629	0.0661252	0.947278	0.999991
423	NC_005105.4	-	108467496	108467485	108467524	Npc2	rna29430	gene16472	protein_coding	c	377.333	582.111	623.565	527.924	365.096	911.396	482.172	642.106	563.963	0.185009	0.361581	0.511669	0.608883	0.999991
424	NC_005120.4	+	107511356	107511289	107511888	Plp1	rna69130	gene38332	protein_coding	o	236.33	660.665	665.964	737.417	289.345	800.461	672.089	450.089	564.045	-0.0578058	0.438835	-0.131726	0.895201	0.999991
425	NC_005112.4	-	49132689	49132680	49132706	Tmcc2	rna51216	gene28046	protein_coding	c	540.182	698.935	607.482	562.64	568.755	558.662	556.958	656.7	593.789	-0.0428415	0.253941	-0.168706	0.866028	0.999991
426	NC_005103.4	+	123454659	123454627	123454974	Iqsec1	rna21392	gene12218	protein_coding	o	849.993	474.685	518.297	582.991	902.805	557.997	544.166	666.684	637.202	0.141303	0.32571	0.433832	0.66441	0.999991
427	NC_005110.4	+	34693491	34693456	34693900	Ttc3	rna47318	gene25910	protein_coding	c	248.246	635.823	438.615	361.526	284.377	743.332	1158.2	624.441	561.82	0.736398	0.449526	1.63816	0.101387	0.999991
428	NC_005103.4	-	124110722	124110690	124110734	Trh	rna21435	gene12234	protein_coding	o	611.677	440.443	590.669	582.991	673.068	637.711	740.971	604.471	610.25	0.256312	0.262843	0.975152	0.329485	0.999991
429	NC_005111.4	+	50243020	50242920	50243317	Sez6l	rna50616	gene27688	protein_coding	o	476.631	682.15	511.718	630.875	669.342	581.247	742.939	492.333	598.404	0.109203	0.28659	0.381042	0.703172	0.999991
430	NC_005102.4	-	2441579	2441569	2441611	Tubb4b	rna13826	gene7772	protein_coding	o	556.07	527.055	512.449	492.011	578.689	827.032	498.901	682.046	584.282	0.310704	0.280015	1.1096	0.267171	0.999991
431	NC_005102.4	+	12011948	12011893	12012181	Rpl12	rna14518	gene8065	protein_coding	o	458.758	771.447	527.069	525.53	998.425	479.612	492.997	531.504	598.168	0.129771	0.355186	0.36536	0.714843	0.999991
432	NC_005115.4	+	19765784	19765762	19766164	Use1	rna58506	gene32035	protein_coding	o	766.582	527.726	481.015	553.063	746.335	661.626	400.498	725.826	607.834	0.124583	0.322734	0.386024	0.699479	0.999991
433	NC_005118.4	+	26090098	26090068	26090417	Prdx2	rna64586	gene35465	protein_coding	o	387.263	775.476	418.147	520.741	509.147	686.868	429.035	758.853	560.691	0.180465	0.348586	0.517704	0.604665	0.999991
434	NC_005109.4	-	35801895	35801883	35801913	Canx	rna42995	gene23654	protein_coding	c	480.603	639.852	411.567	482.434	844.439	726.061	445.763	632.121	582.855	0.39375	0.315826	1.24673	0.212497	0.999991
435	NC_005101.4	+	189912517	189912495	189912706	S100a13	rna11894	gene6672	protein_coding	o	649.41	476.028	642.572	519.544	659.408	979.153	387.706	353.312	583.392	0.0578986	0.3841	0.150738	0.880182	0.999991
436	NC_005107.4	+	111668815	111668793	111669268	Rab6b	rna37712	gene21088	protein_coding	o	556.07	562.64	542.421	608.13	495.487	601.84	553.022	731.97	581.448	0.071108	0.263721	0.269634	0.787442	0.999991
437	NC_005103.4	+	78172033	78172012	78172333	Atp6v0e2	rna20349	gene11564	protein_coding	p	438.898	546.526	609.675	508.77	668.1	703.475	541.214	569.14	573.225	0.236252	0.267308	0.883818	0.376794	0.999991
438	NC_005113.4	+	1004830	1004814	1004929	LOC689547	gene29017	gene29017	pseudogene	o	911.557	741.906	606.02	604.539	587.382	473.634	536.294	420.902	610.279	-0.504149	0.286316	-1.76082	0.0782695	0.999991
439	NC_005119.4	+	5457444	5457427	5457683	Pfdn6	rna66322	gene36524	protein_coding	o	1334.57	359.875	598.71	490.814	1043.13	354.063	440.843	665.148	660.894	-0.151694	0.477505	-0.31768	0.750728	0.999991
440	NC_005109.4	-	14051413	14051406	14051434	Syngr3	rna42359	gene23304	protein_coding	c	305.838	747.948	508.794	559.049	504.18	762.597	488.076	493.869	546.294	0.0815579	0.352178	0.231581	0.816863	0.999991
441	NC_005107.4	-	52857204	52857202	52857208	-	-	-	-	u	1032.7	532.426	677.661	590.173	717.773	248.442	525.469	694.335	627.373	-0.373154	0.399239	-0.934664	0.349962	0.999991
442	NC_005106.4	-	107734325	107734314	107734358	Ndrg1	rna32981	gene18658	protein_coding	o	351.516	517.655	573.124	622.495	301.763	758.611	590.415	668.989	548.071	0.167592	0.364453	0.459845	0.645627	0.999991
443	NC_005104.4	+	126191200	126191177	126191396	-	-	-	-	u	661.326	627.095	535.842	531.515	587.382	548.697	504.805	650.555	580.902	-0.0388749	0.257911	-0.15073	0.880189	0.999991
444	NC_005113.4	+	17523254	17523233	17523597	G3bp2	rna53649	gene29299	protein_coding	o	569.972	510.27	551.924	609.327	683.002	607.154	609.111	543.793	585.569	0.124405	0.248739	0.500143	0.616975	0.999991
445	NC_005100.4	+	190585743	190585610	190586030	Uqcrc2	rna5692	gene3284	protein_coding	o	272.077	651.937	474.436	676.365	357.645	619.111	683.897	662.844	549.789	0.161644	0.377765	0.427896	0.668727	0.999991
446	NC_005108.4	+	111177591	111177578	111177909	Pam	rna41509	gene22884	protein_coding	o	528.266	449.172	591.4	702.701	663.133	426.469	811.821	588.341	595.163	0.131799	0.315716	0.41746	0.676342	0.999991
447	NC_005103.4	-	15710417	15710408	15710431	Cacna2d1	rna19280	gene10904	protein_coding	c	722.891	619.709	422.533	446.521	537.709	585.233	437.891	844.109	577.074	0.123181	0.335908	0.36671	0.713836	0.999991
448	NC_005103.4	-	120785491	120785472	120785512	Podxl2	rna21326	gene12165	protein_coding	o	788.428	486.099	670.351	624.889	972.347	371.334	564.83	463.914	617.774	-0.115591	0.368759	-0.313459	0.753932	0.999991
449	NC_005115.4	-	62273275	62273256	62273298	Ppp2cb	rna59286	gene32492	protein_coding	o	542.168	539.812	470.049	580.597	690.453	745.325	623.872	432.423	578.087	0.225014	0.288745	0.779283	0.435813	0.999991
450	NC_005106.4	-	2906145	2906137	2906196	Myl6	rna30659	gene17213	protein_coding	c	254.203	644.551	487.594	496.799	254.574	996.424	387.706	615.992	517.23	0.258907	0.455104	0.568896	0.569427	0.999991
451	NC_005113.4	+	85281636	85281619	85282004	Ap1b1	rna54970	gene29981	protein_coding	o	460.744	488.113	737.605	682.351	404.834	690.19	530.389	472.363	558.324	-0.175543	0.316372	-0.554862	0.578989	0.999991
452	NC_005104.4	-	151721083	151721075	151721090	-	-	-	-	u	1608.63	411.573	989.809	580.597	904.047	316.199	412.306	117.515	667.584	-1.03708	0.568151	-1.82537	0.0679456	0.999991
453	NC_005100.4	+	226683359	226683337	226683605	Ddb1	rna7649	gene4185	protein_coding	o	403.151	592.853	483.939	445.324	522.807	732.704	507.757	661.308	543.73	0.331239	0.287091	1.15378	0.24859	0.999991
454	NC_005105.4	+	133779910	133779901	133780222	-	-	-	-	u	685.158	451.857	609.675	610.524	1090.32	421.82	480.204	500.781	606.292	0.0804817	0.37657	0.213723	0.830763	0.999991
455	NC_005119.4	+	47263394	47263335	47263659	Snx3	rna67453	gene37131	protein_coding	o	234.344	527.726	476.629	681.153	243.397	708.125	710.466	682.814	533.082	0.28748	0.435126	0.660683	0.508816	0.999991
456	NC_005108.4	-	113875711	113875697	113875743	Ndufv2	rna41575	gene22911	protein_coding	o	339.6	581.439	441.539	476.448	490.52	768.575	517.597	676.669	536.549	0.414072	0.309301	1.33873	0.180657	0.999991
457	NC_005108.4	-	100169248	100169231	100169276	Ppp1r7	rna41331	gene22771	protein_coding	i	337.614	525.712	616.255	665.591	334.05	705.468	728.178	439.336	544.026	0.039972	0.370168	0.107983	0.914009	0.999991
458	NC_005100.4	+	265317844	265317824	265318144	Dpcd	rna8630	gene4756	protein_coding	c	295.909	578.753	461.277	462.083	279.41	846.296	382.786	816.458	515.372	0.370109	0.421002	0.879115	0.379339	0.999991
459	NC_005101.4	-	30125251	30125238	30125277	Cartpt	rna9469	gene5240	protein_coding	o	385.277	453.872	506.601	679.956	383.723	431.784	799.028	821.066	557.663	0.265488	0.367726	0.721972	0.470312	0.999991
460	NC_005100.4	+	220873346	220873220	220873763	Cfl1	rna7206	gene3997	protein_coding	o	685.158	703.635	307.031	550.669	642.022	598.519	451.667	624.441	570.393	0.0457867	0.342517	0.133677	0.893658	0.999991
461	NC_005107.4	+	117611930	117611838	117612201	Nckipsd	rna38040	gene21247	protein_coding	c	516.351	553.911	494.904	594.962	709.081	472.969	584.511	629.049	569.467	0.148289	0.267914	0.553495	0.579925	0.999991
462	NC_005105.4	-	137073682	137073662	137073709	Tmem179	rna30375	gene16903	protein_coding	o	359.459	621.052	381.595	383.074	520.324	751.968	369.993	826.443	526.739	0.499273	0.361587	1.38078	0.167345	0.999991
463	NC_005114.4	-	88004782	88004770	88004807	Ednrb	rna57534	gene31535	protein_coding	c	323.712	588.153	377.209	483.631	442.089	728.054	554.006	748.868	530.715	0.478883	0.328771	1.45659	0.145231	0.999991
464	NC_005107.4	-	117079093	117079062	117079113	Tcta	rna37970	gene21219	protein_coding	o	685.158	497.513	531.456	620.101	818.361	426.469	549.086	571.444	587.448	0.0195322	0.30893	0.0632254	0.949587	0.999991
465	NC_005104.4	-	108607070	108607051	108607102	RGD1560729	gene14099	gene14099	pseudogene	o	252.217	576.739	278.521	614.116	454.507	767.911	552.038	742.723	529.847	0.54686	0.390273	1.40122	0.161147	0.999991
466	NC_005112.4	-	79906713	79906685	79906732	Dnm3	rna52006	gene28409	protein_coding	o	577.916	639.852	459.815	578.202	546.402	440.419	661.265	613.688	564.695	0.00374417	0.279622	0.0133901	0.989317	0.999991
467	NC_005102.4	-	167957997	167957991	167958017	Bcas1	rna18547	gene10505	protein_coding	c	538.196	580.768	569.469	565.034	577.447	528.769	488.076	602.935	556.337	-0.0371248	0.244875	-0.151608	0.879497	0.999991
468	NC_005113.4	+	7155349	7155331	7155720	-	-	-	-	u	1219.38	524.369	519.028	670.38	517.84	361.37	476.268	628.281	614.615	-0.561446	0.37183	-1.50995	0.131056	0.999991
469	NC_005109.4	-	15589366	15589329	15589388	Hba2	rna42573	gene23400	protein_coding	o	804.315	628.438	434.229	288.503	479.343	685.54	551.054	592.182	557.95	0.101249	0.365932	0.276688	0.782019	0.999991
470	NC_005109.4	-	46599391	46599386	46599411	Tom1l2	rna43486	gene23929	protein_coding	c	816.231	442.458	527.801	594.962	956.203	429.791	554.006	502.318	602.971	0.0374121	0.360213	0.103861	0.91728	0.999991
471	NC_005109.4	-	7091238	7091228	7091273	-	-	-	-	u	295.909	576.068	535.111	514.756	238.43	690.854	545.15	735.043	516.415	0.200272	0.403572	0.496247	0.61972	0.999991
472	NC_005105.4	-	109167539	109167534	109167547	LOC102549675	rna29466	gene16490	lncRNA	x	768.568	497.513	509.525	687.139	694.179	401.891	706.53	479.275	593.078	-0.109031	0.324938	-0.335546	0.737213	0.999991
473	NC_005102.4	+	153445631	153445603	153445956	Rpn2	rna18002	gene10225	protein_coding	o	601.747	500.87	465.663	599.75	675.551	672.918	492.012	483.884	561.55	0.101911	0.280776	0.36296	0.716635	0.999991
474	NC_005107.4	+	94858189	94858170	94858413	Mrap2	rna37361	gene20916	protein_coding	o	834.105	422.315	493.442	536.304	669.342	646.347	504.805	509.23	576.986	0.0306565	0.318749	0.0961775	0.92338	0.999991
475	NC_005105.4	-	37001360	37001342	37001432	Vsnl1	rna28159	gene15723	protein_coding	o	280.021	649.923	379.402	487.222	522.807	650.997	415.259	761.157	518.349	0.385247	0.359123	1.07274	0.283386	0.999991
476	NC_005100.4	-	222466568	222466539	222466587	Cox8a	rna7423	gene4081	protein_coding	o	631.537	610.981	360.396	471.66	752.544	436.434	476.268	740.419	560.03	0.214442	0.337309	0.635742	0.524944	0.999991
477	NC_005106.4	+	123145082	123144970	123145398	Aco2	rna33711	gene18958	protein_coding	c	357.474	616.352	442.271	627.284	399.867	681.554	579.591	494.637	524.879	0.0761097	0.324799	0.234328	0.81473	0.999991
478	NC_005100.4	+	92608685	92608669	92608745	-	-	-	-	u	637.494	564.654	537.304	702.701	886.661	231.835	683.897	432.423	584.621	-0.129073	0.409538	-0.315167	0.752635	0.999991
479	NC_005115.4	+	7345512	7345482	7345748	Bap1	rna58109	gene31834	protein_coding	o	699.059	571.368	414.492	446.521	799.734	532.09	338.505	668.221	558.749	0.135036	0.35543	0.379921	0.704004	0.999991
480	NC_005100.4	-	187771631	187771625	187771635	Arl6ip1	rna5582	gene3229	protein_coding	c	983.052	472.671	682.778	465.674	877.968	288.299	471.348	496.173	592.245	-0.287	0.412479	-0.695794	0.486558	0.999991
481	NC_005106.4	-	120760164	120760149	120760176	Kdelr3	rna33595	gene18897	protein_coding	x	196.61	435.744	568.007	468.069	213.593	697.497	708.498	710.464	499.81	0.480085	0.45207	1.06197	0.288249	0.999991
482	NC_005107.4	+	116729397	116729371	116729655	Camkv	rna37937	gene21203	protein_coding	c	550.112	530.412	519.028	411.805	519.082	580.583	386.722	733.507	528.906	0.143289	0.304414	0.470705	0.637852	0.999991
483	NC_005109.4	-	15201504	15201436	15201511	Rhbdl1	rna42524	gene23374	protein_coding	o	750.694	402.173	445.926	523.135	861.825	574.605	417.227	578.356	569.243	0.199175	0.346531	0.574769	0.565448	0.999991
484	NC_005106.4	+	140286508	140286496	140286998	Adcy6	rna34312	gene19251	protein_coding	i	212.498	751.305	377.94	494.405	381.239	647.676	588.447	554.546	501.007	0.239537	0.403832	0.593159	0.553075	0.999991
485	NC_005107.4	+	64502962	64502949	64503096	Gramd2	rna36616	gene20556	protein_coding	o	423.01	662.008	558.504	503.982	529.016	421.155	428.051	672.061	524.723	-0.0691393	0.303541	-0.227776	0.81982	0.999991
486	NC_005103.4	-	51590411	51590297	51590446	Ndufa5	rna19712	gene11179	protein_coding	o	260.161	621.052	398.409	480.04	572.48	655.647	400.498	688.19	509.56	0.393974	0.353951	1.11308	0.265676	0.999991
487	NC_005106.4	-	23815252	23815238	23815274	Fbxo7	rna31550	gene17854	protein_coding	o	498.477	362.56	434.96	547.078	691.695	512.826	450.683	861.006	544.911	0.45069	0.322673	1.39674	0.162492	0.999991
488	NC_005109.4	+	88229765	88229655	88230115	Eif1	rna45594	gene25010	protein_coding	p	236.33	631.795	334.079	379.483	280.652	963.21	464.46	586.037	484.506	0.535115	0.440471	1.21487	0.224415	0.999991
489	NC_005100.4	-	69988671	69988638	69988692	Usp29	rna1552	gene1028	protein_coding	o	440.884	449.843	486.863	590.173	376.272	585.233	627.808	665.916	527.874	0.197475	0.300492	0.657171	0.511071	0.999991
490	NC_005113.4	-	83053044	83053035	83053096	Ywhah	rna54810	gene29923	protein_coding	c	589.831	406.873	650.613	453.703	448.298	465.662	321.776	884.816	527.697	0.0145905	0.377359	0.0386648	0.969158	0.999991
491	NC_005111.4	+	25487981	25487955	25488172	Gtf2i	rna49839	gene27311	protein_coding	o	534.224	500.87	579.703	560.246	397.383	556.005	558.926	541.489	528.606	-0.0817618	0.263748	-0.309999	0.756562	0.999991
492	NC_005100.4	+	162376029	162376012	162376413	Ndufc2	rna4688	gene2655	protein_coding	o	289.951	565.325	350.892	458.492	406.076	772.561	486.108	664.38	499.223	0.483107	0.348557	1.38602	0.165742	0.999991
493	NC_005106.4	-	121485678	121485647	121485704	-	-	-	-	u	1008.87	317.576	543.883	464.477	966.138	431.784	446.747	538.417	589.736	0.0315564	0.428933	0.0735694	0.941353	0.999991
494	NC_005101.4	-	210438887	210438876	210438942	Ahcyl1	rna12701	gene7160	protein_coding	o	333.642	576.739	383.788	566.231	384.965	569.955	662.249	635.194	514.095	0.274568	0.329498	0.833292	0.40468	0.999991
495	NC_005116.4	+	41817084	41817022	41817411	Nrsn1	rna61072	gene33451	protein_coding	p	411.095	502.213	527.069	407.016	495.487	513.491	573.687	697.407	515.933	0.301917	0.27468	1.09916	0.2717	0.999991
496	NC_005109.4	+	65552596	65552571	65552787	RGD1307929	rna44538	gene24465	protein_coding	o	1060.5	480.728	374.285	423.776	851.89	500.869	342.441	591.414	578.238	-0.0302635	0.427293	-0.0708261	0.943536	0.999991
497	NC_005108.4	-	99813424	99813416	99813434	Cops9	rna41352	gene22786	protein_coding	c	701.045	323.619	462.008	442.929	625.879	494.891	450.683	866.383	545.93	0.340745	0.357233	0.953844	0.340163	0.999991
498	NC_005120.4	-	64249584	64249534	64249593	Arhgef9	rna68532	gene37862	protein_coding	o	383.291	968.841	633.799	648.832	91.8949	377.313	746.875	170.511	502.67	-0.926787	0.553762	-1.67362	0.0942053	0.999991
499	NC_005109.4	-	15602793	15602767	15602806	Hba1	rna42576	gene23402	protein_coding	o	530.252	617.024	628.682	497.996	488.036	498.212	696.69	264.216	527.639	-0.225241	0.345829	-0.651307	0.514849	0.999991
500	NC_005106.4	-	78409524	78409515	78409529	Rims2	rna32607	gene18437	protein_coding	i	516.351	559.283	426.188	689.533	661.891	401.227	536.294	552.242	542.876	-0.0270479	0.301442	-0.0897282	0.928503	0.999991
501	NC_005120.4	+	157008739	157008722	157009035	Idh3g	rna69978	gene38841	protein_coding	o	379.319	642.537	448.85	475.251	427.187	591.212	481.188	589.109	504.332	0.100439	0.29748	0.337632	0.735641	0.999991
502	NC_005117.4	+	70983366	70983347	70983660	RGD1562987	rna63564	gene34924	protein_coding	o	180.723	778.162	403.526	484.828	212.352	827.696	347.361	511.534	468.273	0.0385531	0.498606	0.0773217	0.938368	0.999991
503	NC_005109.4	+	14258137	14258116	14258405	Nme3	rna42401	gene23324	protein_coding	o	657.354	443.129	455.429	445.324	774.897	551.355	406.402	606.007	542.487	0.226769	0.317071	0.7152	0.474485	0.999991
504	NC_005106.4	-	83989469	83989462	83989506	-	-	-	-	u	609.691	488.785	334.81	484.828	584.898	632.397	457.572	657.468	531.306	0.285368	0.303179	0.94125	0.346577	0.999991
505	NC_005107.4	+	128809993	128809950	128810309	Rpsa	rna38533	gene21445	protein_coding	o	466.702	511.613	630.875	544.683	423.461	653.654	431.003	430.887	511.61	-0.151808	0.290587	-0.522417	0.60138	0.999991
506	NC_005102.4	+	177047159	177047146	177047551	Dnajc5	rna18894	gene10668	protein_coding	c	327.684	488.113	601.634	518.347	314.181	600.512	566.798	579.125	499.549	0.0888159	0.337774	0.262945	0.792593	0.999991
507	NC_005102.4	+	51822207	51822185	51822483	Scn2a	rna15195	gene8513	protein_coding	p	861.908	428.358	475.167	539.895	767.446	439.091	490.044	519.983	565.237	-0.0543529	0.344867	-0.157605	0.874768	0.999991
508	NC_005113.4	+	2226603	2226592	2226870	Cplx1	rna53164	gene29052	protein_coding	o	353.502	440.443	771.963	616.51	442.089	569.955	565.814	329.502	511.222	-0.196263	0.354224	-0.554064	0.579535	0.999991
509	NC_005112.4	+	83700373	83700333	83700798	Mpc2	rna52124	gene28467	protein_coding	o	315.768	465.286	480.284	572.217	269.475	407.87	559.91	943.958	501.846	0.250021	0.413199	0.605086	0.545122	0.999991
510	NC_005107.4	-	22086533	22086524	22086568	Fdx1l	rna35174	gene19785	protein_coding	o	708.989	455.886	516.835	563.837	936.334	334.798	502.837	480.812	562.541	0.00597085	0.372348	0.0160357	0.987206	0.999991
511	NC_005104.4	-	58018038	58017977	58018060	Enho	rna23921	gene13566	protein_coding	o	436.912	733.849	279.252	238.224	742.61	682.883	229.278	656.7	499.963	0.4525	0.464975	0.973171	0.330468	0.999991
512	NW_007906432.1	+	176923	176913	177140	-	-	-	-	u	1056.53	449.172	694.474	500.39	535.225	199.285	431.003	660.54	565.828	-0.563275	0.429472	-1.31155	0.189671	0.999991
513	NC_005109.4	-	83895946	83895935	83895958	Atp5g1	rna45257	gene24821	protein_coding	c	248.246	617.024	451.774	446.521	356.403	735.361	426.083	559.155	480.071	0.233818	0.37554	0.622618	0.533536	0.999991
514	NC_005100.4	+	122983353	122983308	122983638	Ndn	rna3946	gene2225	protein_coding	o	274.063	692.221	368.437	463.28	429.671	773.889	374.914	486.956	482.929	0.198163	0.385621	0.513879	0.607337	0.999991
515	NW_007906844.1	+	46152	46138	46557	-	-	-	-	u	1547.07	408.887	718.598	457.295	588.624	262.392	308.984	496.941	598.598	-0.916936	0.46996	-1.9511	0.0510456	0.999991
516	NC_005105.4	+	133663575	133663533	133663931	RGD1566401	rna30021	gene16774	lncRNA	i	653.382	369.274	549.731	410.607	355.161	476.291	510.709	824.139	518.662	0.130362	0.359576	0.362545	0.716945	0.999991
517	NC_005112.4	-	79077036	79077013	79077073	Prdx6	rna51970	gene28394	protein_coding	p	188.667	516.984	365.513	496.799	389.932	981.146	458.556	404.005	475.2	0.508688	0.432206	1.17696	0.239212	0.999991
518	NC_005113.4	+	82789345	82789301	82789588	Ctbp1	rna54797	gene29918	protein_coding	o	599.761	527.726	420.34	521.938	639.539	534.748	470.364	505.39	527.476	0.0562668	0.271237	0.207446	0.835662	0.999991
519	NC_005103.4	+	29810513	29810481	29810707	-	-	-	-	u	579.902	350.475	423.264	585.385	849.407	373.327	627.808	602.167	548.967	0.340169	0.349105	0.974402	0.329857	0.999991
520	NC_005104.4	-	147295118	147295112	147295143	Hpca	rna25966	gene14682	protein_coding	o	460.744	568.682	376.478	460.886	476.86	714.104	331.616	586.037	496.926	0.176542	0.330477	0.534204	0.5932	0.999991
521	NC_005111.4	-	51279194	51279188	51279244	Pitpnb	rna50655	gene27708	protein_coding	c	607.705	466.628	483.939	393.848	553.853	470.312	503.821	670.525	518.829	0.173529	0.28448	0.609986	0.541871	0.999991
522	NC_005104.4	-	17056416	17056395	17056447	Penk	rna23411	gene13250	protein_coding	o	595.789	594.196	491.249	336.387	489.278	559.326	350.313	603.703	502.53	-0.00972981	0.324823	-0.0299542	0.976104	0.999991
523	NC_005107.4	-	46528081	46528029	46528105	Sc5d	rna35854	gene20211	protein_coding	c	295.909	457.9	608.944	600.947	306.73	571.283	572.703	507.694	490.264	-0.00526995	0.354402	-0.01487	0.988136	0.999991
524	NC_005120.4	+	157154559	157154530	157154871	Pnck	rna70005	gene38849	protein_coding	o	401.165	560.625	418.878	427.367	367.579	604.497	524.485	619.064	490.458	0.226284	0.300052	0.754152	0.450758	0.999991
525	NC_005112.4	+	52871303	52871273	52871609	Tmem9	rna51455	gene28132	protein_coding	o	518.337	341.747	443.733	586.582	391.174	681.554	623.872	511.534	512.317	0.226988	0.318982	0.7116	0.476713	0.999991
526	NC_005111.4	-	47433352	47433325	47433395	RGD1311899	rna50473	gene27633	protein_coding	o	556.07	587.482	435.691	532.712	932.609	382.627	379.834	454.697	532.715	0.0243192	0.369354	0.0658427	0.947503	0.999991
527	NC_005107.4	-	130483447	130483426	130483460	Higd1a	rna38614	gene21479	protein_coding	c	317.754	592.853	459.815	415.396	392.416	728.718	346.377	549.17	475.312	0.173955	0.353838	0.491625	0.622985	0.999991
528	NC_005120.4	+	123213883	123213818	123214183	Pgrmc1	rna69370	gene38496	protein_coding	o	137.032	330.333	366.975	310.051	187.515	1300.67	350.313	543.793	440.835	1.05615	0.538209	1.96234	0.0497227	0.999991
529	NC_005120.4	-	18440801	18440741	18440812	LOC102551133	rna67939	gene37444	lncRNA	o	510.393	397.473	514.642	495.602	418.494	622.433	461.508	602.935	502.935	0.136701	0.282552	0.483807	0.628523	0.999991
530	NC_005120.4	-	15618327	15618313	15618371	Praf2	rna67865	gene37391	protein_coding	o	405.137	573.382	505.139	478.843	325.357	513.491	537.278	567.603	488.279	-0.0146803	0.300892	-0.0487892	0.961087	0.999991
531	NC_005106.4	-	75573538	75573528	75573590	Ywhaz	rna32548	gene18406	protein_coding	o	1060.5	345.104	402.064	531.515	757.512	464.334	490.044	475.435	565.814	-0.0937049	0.408123	-0.2296	0.818403	0.999991
532	NC_005111.4	+	37033695	37033672	37034023	Ncor2	rna50021	gene27411	protein_coding	o	736.793	403.516	340.658	517.15	680.519	506.183	394.594	674.365	531.722	0.178425	0.352738	0.50583	0.612976	0.999991
533	NC_005112.4	-	89606857	89606840	89606898	Ndufs2	rna52325	gene28587	protein_coding	o	440.884	567.34	456.16	690.73	416.011	508.841	596.319	361.761	504.756	-0.195444	0.308637	-0.633249	0.526571	0.999991
534	NC_005100.4	+	197907189	197907165	197907495	Tufm	rna5913	gene3390	protein_coding	o	639.48	396.802	587.014	265.758	788.557	445.069	257.815	716.609	512.138	0.225777	0.429162	0.526087	0.598828	0.999991
535	NC_005114.4	-	109734068	109734062	109734077	Nalcn	rna57835	gene31701	protein_coding	p	357.474	506.241	399.871	478.843	444.572	649.668	609.111	462.378	488.52	0.312511	0.289358	1.08001	0.280136	0.999991
536	NC_005102.4	-	67725177	67725148	67725220	Nckap1	rna15537	gene8713	protein_coding	o	560.042	523.027	448.85	501.588	450.782	508.841	571.719	484.652	506.187	-0.0108848	0.254165	-0.0428258	0.96584	0.999991
537	NC_005101.4	-	62556156	62556146	62556161	LOC100363177	rna10034	gene5591	transcribed_pseudogene	o	419.038	467.3	323.844	377.088	296.796	793.818	321.776	760.389	470.006	0.454718	0.400471	1.13546	0.256184	0.999991
538	NC_005105.4	+	137958495	137958474	137958868	Crip2	rna30438	gene16925	protein_coding	o	508.407	532.426	340.658	360.329	381.239	722.74	349.329	650.555	480.71	0.274577	0.356519	0.770162	0.441204	0.999991
539	NC_005100.4	-	72701281	72701269	72701316	Brsk1	rna1722	gene1114	protein_coding	o	379.319	550.554	528.532	496.799	438.363	498.212	419.195	562.995	484.246	-0.0291805	0.276243	-0.105633	0.915873	0.999991
540	NC_005113.4	-	82664246	82664233	82664265	Maea	rna54796	gene29917	protein_coding	o	262.147	480.728	386.713	532.712	288.103	664.283	613.048	556.082	472.977	0.350784	0.369707	0.948817	0.342714	0.999991
541	NC_005113.4	+	68400926	68400848	68401297	-	-	-	-	u	510.393	482.742	591.4	695.519	471.893	858.253	227.31	99.8491	492.17	-0.45981	0.530411	-0.866895	0.386	0.999991
542	NC_005118.4	+	51989539	51989511	51990011	Hsbp1	rna65357	gene35873	protein_coding	o	323.712	556.597	399.871	495.602	366.338	529.433	564.83	588.341	478.091	0.204741	0.312531	0.655108	0.512398	0.999991
543	NC_005114.4	-	43475638	43475620	43475646	Dpysl2	rna56855	gene31160	protein_coding	o	444.856	491.47	535.842	586.582	536.467	375.984	653.393	410.917	504.439	-0.0605853	0.299901	-0.202017	0.839903	0.999991
544	NC_005103.4	+	123453882	123453858	123454196	Iqsec1	rna21392	gene12218	protein_coding	c	659.34	375.317	539.497	432.155	840.714	443.741	431.987	460.074	522.853	0.118255	0.349769	0.338094	0.735292	0.999991
545	NC_005118.4	-	52465083	52465065	52465105	Cotl1	rna65399	gene35890	protein_coding	o	480.603	430.372	451.043	553.063	439.605	562.647	553.022	493.101	495.432	0.0986914	0.260424	0.378964	0.704715	0.999991
546	NC_005100.4	+	244782901	244782887	244783224	Smarca2	rna8013	gene4454	protein_coding	c	681.186	278.634	470.049	519.544	591.107	514.819	486.108	602.167	517.952	0.174343	0.334652	0.520968	0.602389	0.999991
547	NC_005104.4	-	92862228	92862204	92862248	Ptprd	rna24623	gene13964	protein_coding	o	430.954	442.458	424.726	562.64	434.638	514.155	597.303	535.345	492.777	0.162238	0.269125	0.602834	0.546619	0.999991
548	NC_005100.4	-	219254291	219254280	219254320	Ndufv1	rna7018	gene3899	protein_coding	o	528.266	484.085	608.213	409.41	386.207	732.704	346.377	327.966	477.904	-0.17789	0.353867	-0.502704	0.615172	0.999991
549	NC_005103.4	+	7108335	7108318	7108570	Smarcd3	rna19111	gene10806	protein_coding	o	488.547	521.012	483.939	339.978	379.998	674.247	220.422	645.179	469.165	0.0674516	0.395305	0.170632	0.864513	0.999991
550	NC_005119.4	+	39690319	39690289	39690711	-	-	-	-	u	1185.62	4.02845	347.237	1167.18	1556	215.228	4.92012	551.474	628.961	-0.21612	1.54059	-0.140284	0.888436	0.999991
551	NC_005106.4	-	11191128	11191122	11191134	Dohh	rna30939	gene17484	protein_coding	c	605.719	425.001	516.835	492.011	612.218	423.148	529.405	480.044	510.548	0.00474136	0.276902	0.0171229	0.986339	0.999991
552	NC_005114.4	-	23597847	23597841	23597861	Gmfb	rna56012	gene30537	protein_coding	c	379.319	578.753	289.486	369.906	447.056	691.518	420.179	583.733	469.994	0.405348	0.335745	1.20731	0.227312	0.999991
553	NC_005105.4	-	123187724	123187719	123187735	Foxn3	rna29685	gene16608	protein_coding	c	802.329	386.059	486.132	511.164	829.537	322.841	407.386	541.489	535.867	-0.0554819	0.387844	-0.143052	0.886249	0.999991
554	NC_005107.4	+	97405090	97405068	97405456	Rasgrf1	rna37414	gene20948	protein_coding	o	127.102	579.425	391.83	435.747	379.998	689.525	458.556	539.185	450.171	0.426946	0.436318	0.978521	0.327817	0.999991
555	NC_005104.4	+	79373846	79373829	79374123	Atp6v1g1	rna24521	gene13901	protein_coding	o	291.937	530.412	478.822	598.553	316.665	717.425	594.351	234.261	470.303	-0.0293582	0.418417	-0.070165	0.944062	0.999991
556	NC_005113.4	+	11166319	11166289	11166519	Tmem150c	rna53519	gene29212	protein_coding	o	460.744	476.028	552.655	488.419	625.879	369.341	488.076	513.071	496.777	0.0112684	0.282694	0.0398609	0.968204	0.999991
557	NC_005101.4	-	210249659	210249653	210249679	Slc6a17	rna12698	gene7157	protein_coding	o	695.087	361.217	452.505	404.622	798.492	446.398	348.345	618.296	515.62	0.211061	0.36865	0.572524	0.566967	0.999991
558	NC_005106.4	-	119144184	119144180	119144206	LOC102553868	rna33451	gene18842	protein_coding	i	742.751	385.388	538.035	447.718	753.786	344.763	490.044	486.956	523.68	-0.025234	0.355416	-0.0709985	0.943399	0.999991
559	NC_005113.4	+	85758805	85758748	85759240	Xbp1	rna55005	gene29993	protein_coding	o	536.21	440.443	355.278	447.718	452.023	559.99	480.204	639.802	488.959	0.264219	0.282513	0.935245	0.349662	0.999991
560	NC_005103.4	-	81236830	81236816	81236841	Hnrnpa2b1	rna20467	gene11628	protein_coding	p	297.895	457.229	385.251	477.645	422.22	558.662	572.703	599.094	471.337	0.409976	0.29236	1.4023	0.160826	0.999991
561	NC_005101.4	-	235850289	235850272	235850296	Rpl34	rna13136	gene7418	protein_coding	o	472.659	514.97	315.803	475.251	634.571	377.977	503.821	668.221	495.409	0.296763	0.319148	0.929861	0.352443	0.999991
562	NC_005103.4	+	55718674	55718663	55718877	Arf5	rna19761	gene11202	protein_coding	o	278.035	273.263	697.398	557.852	475.618	654.983	394.594	427.815	469.945	0.111059	0.392988	0.282602	0.777482	0.999991
563	NC_005104.4	+	72141698	72141658	72142071	Rad23b	rna24307	gene13786	protein_coding	o	405.137	476.699	470.781	529.121	330.325	449.055	620.92	553.01	479.381	0.0535831	0.304069	0.176221	0.860121	0.999991
564	NC_005102.4	-	52997850	52997837	52997876	RGD1560831	gene8526	gene8526	pseudogene	o	135.046	571.368	423.264	357.935	181.306	800.461	312.92	631.353	426.707	0.370754	0.517826	0.715982	0.474002	0.999991
565	NC_005120.4	+	159172527	159172504	159172896	Fhl1	rna70107	gene38888	protein_coding	o	262.147	520.341	388.175	379.483	376.272	575.933	494.965	648.251	455.696	0.43204	0.329146	1.31261	0.189315	0.999991
566	NC_005109.4	+	109662074	109662049	109662237	Mrpl12	rna46729	gene25531	protein_coding	c	373.361	602.253	286.562	331.598	584.898	752.632	298.16	460.842	461.288	0.394779	0.385912	1.02298	0.306318	0.999991
567	NC_005109.4	-	25903924	25903916	25903951	Ccng1	rna42755	gene23499	protein_coding	o	546.14	451.186	383.057	471.66	569.997	445.734	500.869	581.429	493.759	0.182038	0.269782	0.67476	0.499828	0.999991
568	NC_005119.4	+	37889094	37889079	37889309	Gja1	rna67300	gene37032	protein_coding	o	103.27	631.123	312.148	366.315	299.279	790.496	366.057	559.155	428.48	0.509251	0.502006	1.01443	0.310376	0.999991
569	NC_005104.4	+	156676435	156676385	156676618	Ddost	rna26506	gene14906	protein_coding	p	583.873	407.544	497.097	490.814	671.826	364.691	504.805	503.854	503.063	0.0477088	0.302681	0.15762	0.874756	0.999991
570	NC_005109.4	+	94132421	94132407	94132689	Tanc2	rna46022	gene25191	protein_coding	o	567.986	504.899	388.906	399.834	711.564	416.505	450.683	518.447	494.853	0.172409	0.308122	0.559548	0.575788	0.999991
571	NC_005107.4	+	44159015	44158986	44159326	Scn3b	rna35804	gene20180	protein_coding	o	522.309	392.102	489.056	474.054	448.298	531.426	539.246	468.523	483.127	0.0843525	0.258854	0.325869	0.744524	0.999991
572	NC_005110.4	-	71921714	71921698	71921730	Cep19	rna48148	gene26375	protein_coding	o	333.642	484.756	496.366	490.814	299.279	538.069	471.348	545.329	457.45	0.0372869	0.316729	0.117725	0.906286	0.999991
573	NC_005118.4	+	762899	762883	763200	Dync1li2	rna63906	gene35121	protein_coding	o	619.621	476.699	470.049	575.808	772.414	370.005	471.348	317.981	509.241	-0.149728	0.352221	-0.425096	0.670766	0.999991
574	NC_005109.4	-	88392253	88392239	88392266	Acly	rna45613	gene25020	protein_coding	o	524.295	386.059	491.249	536.304	490.52	585.897	520.549	344.863	484.967	0.0043873	0.295528	0.0148456	0.988155	0.999991
575	NC_005111.4	+	47137097	47137069	47137432	Rnf10	rna50455	gene27622	protein_coding	o	591.817	390.088	443.002	535.107	643.264	426.469	478.236	473.899	497.735	0.0464747	0.292274	0.159011	0.87366	0.999991
576	NC_005100.4	-	266287017	266286991	266287092	Arl3	rna8718	gene4785	protein_coding	o	399.179	496.842	543.883	503.982	312.939	508.841	470.364	453.161	461.149	-0.155983	0.288181	-0.541266	0.588324	0.999991
577	NC_005106.4	-	11752121	11752114	11752153	Oaz1	rna31034	gene17522	protein_coding	o	387.263	392.102	421.071	460.886	435.88	565.305	477.252	584.501	465.532	0.313059	0.261772	1.19592	0.231727	0.999991
578	NC_005115.4	-	20645954	20645949	20645966	Fkbp8	rna58649	gene32093	protein_coding	c	419.038	525.712	388.175	471.66	340.259	682.883	334.568	480.812	455.388	0.0280115	0.333364	0.0840266	0.933035	0.999991
579	NC_005115.4	+	74308909	74308895	74309189	Vdac3	rna59574	gene32633	protein_coding	o	391.235	457.229	486.132	462.083	244.639	689.525	399.514	473.131	450.436	0.00908104	0.356269	0.0254893	0.979665	0.999991
580	NC_005109.4	+	10766094	10766059	10766521	Rogdi	rna42029	gene23144	protein_coding	o	456.772	373.974	584.089	495.602	396.141	445.734	488.076	526.896	470.911	-0.0407236	0.280525	-0.145169	0.884577	0.999991
581	NC_005110.4	+	65966901	65966892	65967202	RGD1561232	gene26271	gene26271	pseudogene	o	371.375	425.001	414.492	629.678	448.298	405.212	541.214	562.995	474.783	0.0884777	0.301156	0.293794	0.768916	0.999991
582	NC_005100.4	-	73734621	73734567	73734650	Ttyh1	rna1803	gene1145	protein_coding	o	156.891	488.113	302.645	442.929	307.972	640.369	488.076	665.916	436.614	0.593683	0.415368	1.42929	0.15292	0.999991
583	NC_005120.4	+	23090907	23090889	23091176	Tro	rna68049	gene37510	protein_coding	o	256.189	433.058	383.788	397.439	298.037	743.997	394.594	587.573	436.835	0.460052	0.367821	1.25075	0.211026	0.999991
584	NC_005103.4	-	57511418	57511408	57511430	Ube2h	rna19862	gene11244	protein_coding	o	490.533	388.074	381.595	458.492	668.1	447.062	409.354	612.92	482.016	0.316007	0.295798	1.06832	0.285376	0.999991
585	NC_005119.4	-	13131717	13131696	13131728	S100b	rna66756	gene36720	protein_coding	c	172.779	214.179	871.383	501.588	355.161	625.754	628.792	198.162	445.975	0.0369807	0.536567	0.0689209	0.945053	0.999991
586	NC_005110.4	+	83594316	83594305	83594622	-	-	-	-	u	959.221	574.725	488.325	385.468	494.245	703.475	267.655	62.9817	492.012	-0.654545	0.570369	-1.14758	0.251142	0.999991
587	NC_005111.4	+	13718818	13718807	13719104	Actb	rna49269	gene26998	protein_coding	o	367.403	343.761	564.352	367.512	411.043	611.14	564.83	413.221	455.408	0.282844	0.31318	0.903136	0.366454	0.999991
588	NC_005113.4	+	72949579	72949559	72949799	Pp2d1	rna54469	gene29788	protein_coding	x	728.849	378.003	399.871	426.17	671.826	458.355	416.243	499.245	497.32	0.0851158	0.335537	0.253671	0.79975	0.999991
589	NC_005103.4	+	177012449	177012435	177012760	Cmas	rna22942	gene12987	protein_coding	o	421.024	406.202	466.394	464.477	464.442	582.576	456.588	440.872	462.822	0.145745	0.258341	0.564158	0.572647	0.999991
590	NC_005103.4	-	157436583	157436538	157436607	Ptms	rna22219	gene12607	protein_coding	e	546.14	484.085	972.264	569.823	276.926	271.027	260.767	328.734	463.721	-1.17821	0.323047	-3.64718	0.00026513	0.999991
591	NC_005112.4	-	90580575	90580568	90580616	Pea15	rna52432	gene28629	protein_coding	c	454.786	449.172	451.043	465.674	384.965	575.933	465.444	420.134	458.394	0.0215994	0.266632	0.0810083	0.935435	0.999991
592	NC_005103.4	+	33646821	33646800	33647188	Tac1	rna19536	gene11069	protein_coding	o	395.207	444.472	314.341	497.996	393.658	510.169	582.543	549.938	461.04	0.302796	0.292578	1.03492	0.300705	0.999991
593	NC_005109.4	-	90351897	90351888	90351922	Slc25a39	rna45818	gene25111	protein_coding	o	651.396	365.917	383.788	496.799	653.199	545.376	416.243	394.788	488.438	0.0855126	0.328415	0.26038	0.794571	0.999991
594	NC_005104.4	+	21696718	21696591	21697111	Rab2a	rna23463	gene13282	protein_coding	o	188.667	552.569	442.271	434.55	244.639	635.054	463.476	441.64	425.358	0.139203	0.412254	0.337663	0.735617	0.999991
595	NC_005102.4	+	114092103	114091966	114092586	B2m	rna16767	gene9577	protein_coding	c	297.895	464.614	447.388	458.492	399.867	468.319	529.405	523.824	448.725	0.200818	0.286478	0.700988	0.48331	0.999991
596	NC_005119.4	+	13212613	13212602	13212840	Prmt2	rna66759	gene36721	protein_coding	o	462.73	421.644	398.409	486.025	355.161	518.14	408.37	604.471	456.869	0.095192	0.291428	0.326639	0.743941	0.999991
597	NC_005106.4	+	120262633	120262518	120262933	H1f0	rna33539	gene18880	protein_coding	o	629.551	452.529	342.851	459.689	692.937	439.755	409.354	457.77	485.554	0.0875742	0.324693	0.269714	0.78738	0.999991
598	NC_005115.4	-	22326535	22326523	22326562	Atp6v1b2	rna58778	gene32155	protein_coding	o	560.042	445.143	456.16	429.761	643.264	454.369	376.882	429.351	474.372	0.0102958	0.293707	0.0350545	0.972036	0.999991
599	NC_005111.4	-	22677601	22677594	22677633	Vgf	rna49677	gene27236	protein_coding	c	303.852	415.601	299.721	409.41	404.834	508.841	924.983	395.556	457.85	0.644078	0.364408	1.76746	0.0771507	0.999991
600	NC_005105.4	+	133794193	133794178	133794457	-	-	-	-	u	464.716	380.688	505.139	501.588	434.638	471.641	509.725	433.191	462.666	-0.00153262	0.259297	-0.00591067	0.995284	0.999991
601	NC_005107.4	+	71229791	71229687	71229946	Oaz2	rna36856	gene20666	protein_coding	o	403.151	370.617	244.163	257.378	910.256	573.276	353.265	608.311	465.052	0.940362	0.36673	2.56418	0.0103419	0.999991
602	NC_005103.4	+	92921758	92921747	92922153	-	-	-	-	u	454.786	467.971	458.353	562.64	620.911	334.798	600.255	309.532	476.156	-0.0610636	0.337585	-0.180884	0.856459	0.999991
603	NC_005104.4	+	167664506	167664495	167664849	Rere	rna26960	gene15149	protein_coding	o	405.137	382.031	453.967	526.727	284.377	452.377	584.511	536.881	453.251	0.0727897	0.321654	0.226298	0.820969	0.999991
604	NC_005104.4	-	151703145	151703113	151703168	Trnp1	rna26221	gene14783	protein_coding	o	693.101	395.459	401.333	497.996	679.277	401.227	378.85	457.77	488.127	-0.0500914	0.336387	-0.14891	0.881625	0.999991
605	NC_005107.4	-	132344082	132344073	132344085	Tmem158	rna38722	gene21522	protein_coding	p	423.01	311.533	372.823	444.126	566.271	666.94	474.3	405.541	458.068	0.447913	0.29614	1.51251	0.130405	0.999991
606	NC_005100.4	+	78682856	78682842	78683183	Ap2s1	rna1937	gene1251	protein_coding	o	432.94	418.287	609.675	468.069	392.416	613.133	268.639	344.863	443.503	-0.25245	0.342419	-0.737255	0.460967	0.999991
607	NC_005114.4	-	43673956	43673951	43674013	Ppp2r2a	rna56865	gene31163	protein_coding	c	419.038	508.256	281.445	232.239	336.534	880.175	246.006	482.348	423.255	0.434155	0.444014	0.977797	0.328175	0.999991
608	NC_005109.4	-	15197754	15197672	15197758	Stub1	rna42521	gene23373	protein_coding	o	254.203	402.845	508.063	506.376	356.403	660.961	445.763	335.646	433.783	0.104186	0.3603	0.289165	0.772455	0.999991
609	NC_005109.4	-	56527073	56527069	56527096	Eif5a	rna43959	gene24157	protein_coding	c	637.494	362.56	392.561	482.434	646.99	549.362	403.45	351.008	478.232	0.0598136	0.335818	0.178113	0.858634	0.999991
610	NC_005109.4	-	89187164	89187135	89187194	LOC103693430	rna45704	gene25054	protein_coding	o	444.856	366.589	643.303	518.347	360.129	427.798	303.08	510.766	446.858	-0.300418	0.317971	-0.944797	0.344763	0.999991
611	NC_005105.4	+	8273550	8273524	8273881	Ppm1b	rna27591	gene15398	protein_coding	o	544.154	451.186	383.788	456.098	560.062	442.412	391.642	477.739	463.385	0.0303063	0.275297	0.110086	0.912342	0.999991
612	NC_005100.4	-	103197920	103197908	103197935	Ptpn5	rna3656	gene2059	protein_coding	o	522.309	359.875	442.271	470.463	614.702	370.67	444.779	521.519	468.323	0.121936	0.2952	0.413063	0.679561	0.999991
613	NC_005108.4	+	73462968	73462941	73463409	Map2	rna40520	gene22432	protein_coding	o	144.975	486.771	399.871	500.39	188.757	868.217	464.46	216.596	408.755	0.180863	0.528436	0.342262	0.732154	0.999991
614	NC_005109.4	-	57613878	57613874	57613893	C1qbp	rna44108	gene24218	protein_coding	c	558.056	437.758	538.035	342.372	260.783	516.812	459.54	433.191	443.318	-0.165382	0.330186	-0.500876	0.616458	0.999991
615	NC_005102.4	+	154869896	154869863	154870144	Snhg11	rna18057	gene10252	protein_coding	c	353.502	381.36	601.634	442.929	249.606	399.234	608.127	467.754	438.018	-0.0459864	0.357692	-0.128564	0.897702	0.999991
616	NC_005112.4	-	91830274	91830258	91830285	-	-	-	-	u	621.607	310.862	554.117	542.289	514.115	388.605	389.674	448.553	471.228	-0.218955	0.316418	-0.69198	0.48895	0.999991
617	NC_005100.4	+	140446574	140446561	140446685	-	-	-	-	u	488.547	400.83	1057.79	418.987	643.264	314.206	304.064	15.3614	455.382	-0.891521	0.688914	-1.2941	0.195632	0.999991
618	NC_005106.4	-	138088653	138088641	138088671	Slc38a2	rna34188	gene19188	protein_coding	o	369.389	594.867	281.445	351.949	481.827	636.383	257.815	456.233	428.739	0.197136	0.378305	0.521104	0.602294	0.999991
619	NC_005100.4	-	77836204	77836200	77836212	Gltscr2	rna1879	gene1225	protein_coding	p	478.617	421.644	460.546	488.419	466.925	403.884	385.738	512.302	452.26	-0.0632897	0.258097	-0.245217	0.806288	0.999991
620	NC_005100.4	+	170387530	170387507	170387843	Smpd1	rna5202	gene2984	protein_coding	o	395.207	413.587	400.602	430.958	337.776	574.605	449.699	481.58	435.502	0.169945	0.280866	0.605074	0.54513	0.999991
621	NC_005100.4	-	141874354	141874347	141874366	Idh2	rna4259	gene2405	protein_coding	c	476.631	355.175	474.436	435.747	516.598	419.827	447.731	504.622	453.846	0.117789	0.263827	0.446465	0.655262	0.999991
622	NC_005100.4	-	115864694	115864689	115864700	-	-	-	-	u	542.168	496.17	410.836	537.501	676.793	288.963	419.195	389.411	470.13	-0.164078	0.336938	-0.486968	0.626281	0.999991
623	NC_005109.4	-	82838266	82838258	82838275	Pdk2	rna45187	gene24789	protein_coding	o	307.824	435.072	252.935	276.532	591.107	619.776	287.335	652.091	427.834	0.75629	0.359236	2.10527	0.0352675	0.999991
624	NC_005115.4	-	20863140	20863104	20863159	Cope	rna58675	gene32107	protein_coding	o	282.007	437.758	522.683	311.248	227.254	658.304	365.073	472.363	409.586	0.148217	0.392155	0.377955	0.705464	0.999991
625	NC_005109.4	-	81648213	81648207	81648254	Nme2	rna45073	gene24747	protein_coding	o	438.898	302.805	565.083	319.627	245.881	462.341	147.604	896.337	422.322	0.108692	0.505496	0.215021	0.829751	0.999991
626	NC_005118.4	-	59863419	59863373	59863444	Tomm20	rna65706	gene36055	protein_coding	o	287.965	460.586	339.196	462.083	448.298	561.319	457.572	433.959	431.372	0.292593	0.293301	0.997585	0.318481	0.999991
627	NC_005102.4	+	103955970	103955926	103956250	Emc7	rna16414	gene9402	protein_coding	o	359.459	433.058	356.741	520.741	360.129	475.626	512.677	489.26	438.461	0.138221	0.28621	0.482936	0.629142	0.999991
628	NC_005100.4	-	83969454	83969449	83969485	Egln2	rna2366	gene1471	protein_coding	c	516.351	490.799	519.759	342.372	442.089	437.762	369.009	406.309	440.556	-0.175525	0.276737	-0.634266	0.525907	0.999991
629	NC_005103.4	+	85711700	85711680	85711916	Adcyap1r1	rna20622	gene11709	protein_coding	o	226.4	403.516	435.691	525.53	255.815	545.376	577.623	407.845	422.225	0.165636	0.38004	0.435838	0.662954	0.999991
630	NC_005117.4	+	29602711	29602695	29603010	Ik	rna62761	gene34421	protein_coding	o	583.873	363.903	546.807	444.126	391.174	338.12	468.396	490.797	453.4	-0.197453	0.297563	-0.663568	0.506967	0.999991
631	NC_005109.4	-	94136992	94136989	94137003	Cyb561	rna46026	gene25194	protein_coding	c	405.137	345.104	305.569	433.352	659.408	437.098	478.236	549.17	451.634	0.513588	0.286682	1.79149	0.0732146	0.999991
632	NC_005107.4	-	94447574	94447556	94447581	Snap91	rna37348	gene20911	protein_coding	c	333.642	443.801	451.043	415.396	413.527	441.748	429.035	506.158	429.294	0.12071	0.262498	0.459849	0.645624	0.999991
633	NC_005106.4	+	70377425	70377398	70377724	Agap2	rna32353	gene18306	protein_coding	o	601.747	435.072	310.686	307.656	771.172	402.555	277.495	567.603	459.248	0.288263	0.397913	0.724439	0.468796	0.999991
634	NC_005110.4	-	83948896	83948878	83948907	Ece2	rna48472	gene26555	protein_coding	o	889.712	362.56	321.651	372.3	474.376	412.52	533.342	458.538	478.125	-0.0462258	0.384707	-0.120158	0.904358	0.999991
635	NC_005100.4	+	219362100	219362071	219362464	Pitpnm1	rna7033	gene3904	protein_coding	o	714.947	406.873	410.836	490.814	769.93	310.22	421.163	327.966	481.594	-0.14487	0.386096	-0.375218	0.707498	0.999991
636	NC_005109.4	+	38955044	38955033	38955407	Kif3a	rna43149	gene23730	protein_coding	p	450.814	363.232	480.284	469.266	370.063	456.362	437.891	486.188	439.262	-0.00897234	0.265131	-0.0338412	0.973004	0.999991
637	NC_005103.4	-	116992652	116992640	116992668	-	-	-	-	u	200.582	506.913	361.858	497.996	270.717	610.476	470.364	380.963	412.484	0.142604	0.393216	0.362659	0.716859	0.999991
638	NC_005108.4	-	111998218	111998193	111998232	Pja2	rna41544	gene22892	protein_coding	o	307.824	512.956	332.617	453.703	330.325	533.419	401.482	490.797	420.39	0.126919	0.316378	0.401161	0.688302	0.999991
639	NC_005100.4	-	165564177	165564165	165564192	Mrpl48	rna4854	gene2730	protein_coding	c	462.73	357.189	385.982	396.242	489.278	443.741	347.361	635.962	439.81	0.260755	0.298539	0.873436	0.382425	0.999991
640	NC_005104.4	-	99031005	99030981	99031015	LOC100363133	gene13993	gene13993	pseudogene	o	1068.45	529.069	288.755	313.642	280.652	445.069	296.192	526.896	468.59	-0.502134	0.455384	-1.10266	0.270174	0.999991
641	NC_005109.4	+	57238528	57238507	57238849	Mink1	rna44061	gene24197	protein_coding	o	387.263	453.2	371.361	438.141	440.847	517.476	393.61	449.321	431.402	0.126522	0.259182	0.48816	0.625437	0.999991
642	NC_005104.4	-	168140139	168140115	168140162	Camta1	rna27001	gene15166	protein_coding	c	313.782	390.759	605.289	483.631	281.894	464.998	551.054	309.532	425.117	-0.159561	0.354368	-0.450268	0.652517	0.999991
643	NC_005106.4	-	141159625	141159615	141159660	Faim2	rna34415	gene19295	protein_coding	c	484.575	430.372	394.023	384.271	594.833	464.334	368.025	433.959	444.299	0.137026	0.28218	0.485598	0.627253	0.999991
644	NC_005109.4	+	83310883	83310822	83311053	Spop	rna45207	gene24802	protein_coding	c	631.537	471.328	466.394	372.3	738.884	352.734	319.808	337.183	461.271	-0.151304	0.370943	-0.407889	0.683355	0.999991
645	NC_005101.4	-	189900513	189900499	189900526	S100a1	rna11893	gene6671	protein_coding	c	363.431	445.143	336.272	383.074	445.814	505.519	365.073	566.067	426.299	0.301035	0.281476	1.06949	0.284849	0.999991
646	NC_005119.4	+	20480640	20480619	20481189	Ank3	rna66903	gene36809	protein_coding	o	516.351	386.059	496.366	381.877	639.539	345.427	347.361	485.42	449.8	0.0295515	0.322282	0.0916946	0.926941	0.999991
647	NC_005100.4	-	89563978	89563975	89564008	Gramd1a	rna2860	gene1704	protein_coding	c	790.414	361.889	324.575	381.877	651.957	402.555	369.009	496.173	472.306	0.0502939	0.380755	0.13209	0.894913	0.999991
648	NC_005104.4	-	135482066	135482058	135482102	Akr1a1	rna25401	gene14407	protein_coding	o	262.147	349.803	654.999	383.074	180.064	486.255	266.671	633.657	402.084	-0.0752972	0.450586	-0.167109	0.867284	0.999991
649	NC_005109.4	+	57133688	57133677	57133926	Psmb6	rna44049	gene24194	protein_coding	o	448.828	289.377	456.891	316.036	408.56	304.241	320.792	899.41	430.517	0.356703	0.413025	0.863635	0.387789	0.999991
650	NC_005107.4	-	116406259	116406244	116406264	Slc38a3	rna37913	gene21192	protein_coding	o	893.684	316.904	341.389	329.204	876.727	339.448	314.888	480.044	486.536	0.0990089	0.465224	0.21282	0.831467	0.999991
651	NC_005103.4	+	2605761	2605744	2605919	Ube3c	rna19045	gene10755	protein_coding	c	627.565	348.461	432.767	432.155	588.624	352.07	401.482	480.044	457.896	-0.0123501	0.319602	-0.0386421	0.969176	0.999991
652	NC_005106.4	-	24650160	24650069	24650201	Tmem263	rna31570	gene17866	protein_coding	o	579.902	438.429	430.574	353.146	644.506	383.955	376.882	395.556	450.369	-0.000336704	0.320757	-0.00104972	0.999162	0.999991
653	NC_005120.4	+	77071643	77071629	77071944	Cox7b	rna68838	gene38074	protein_coding	o	162.849	626.423	496.366	342.372	211.11	394.584	373.929	536.113	392.968	-0.105978	0.444586	-0.238375	0.81159	0.999991
654	NC_005100.4	-	263246257	263246240	263246281	Got1	rna8504	gene4706	protein_coding	o	280.021	488.113	373.554	420.184	257.057	549.362	418.211	486.188	409.086	0.130383	0.342222	0.380989	0.703211	0.999991
655	NC_005102.4	+	110589904	110589879	110590177	Disp2	rna16533	gene9474	protein_coding	o	166.821	528.398	309.224	342.372	388.69	607.819	408.37	454.697	400.799	0.461247	0.382748	1.20509	0.228168	0.999991
656	NC_005118.4	-	10423532	10423520	10423607	Adgrg1	rna64030	gene35192	protein_coding	o	464.716	437.086	413.029	447.718	455.749	358.713	476.268	454.697	438.497	-0.0138869	0.255583	-0.0543343	0.956669	0.999991
657	NC_005102.4	-	167958273	167958228	167958285	Bcas1	rna18547	gene10505	protein_coding	c	627.565	431.715	504.408	360.329	547.644	263.72	335.553	519.983	448.865	-0.206314	0.351355	-0.587195	0.557073	0.999991
658	NC_005111.4	-	16117765	16117760	16117771	Lfng	rna49309	gene27022	protein_coding	c	522.309	339.732	437.884	470.463	687.97	445.069	387.706	327.198	452.291	0.0624256	0.334066	0.186866	0.851766	0.999991
659	NW_007906753.1	+	197	196	209	-	-	-	-	u	5.95789	9.39971	1505.91	106.542	38.4965	69.7497	1475.05	2.30421	401.677	-0.038332	1.9158	-0.0200084	NA	NA
660	NC_005101.4	-	200484248	200484239	200484258	Phgdh	rna12380	gene6977	protein_coding	c	581.887	388.074	364.051	380.68	466.925	528.769	274.543	511.534	437.058	0.0591319	0.332099	0.178055	0.85868	0.999991
661	NC_005103.4	+	163302862	163302835	163303108	Gabarapl1	rna22517	gene12761	protein_coding	o	184.695	448.5	313.61	396.242	274.443	633.726	375.898	554.546	397.707	0.450972	0.392369	1.14936	0.250409	0.999991
662	NC_005104.4	+	147689767	147689619	147689899	Bsdc1	rna25998	gene14696	protein_coding	o	403.151	388.745	367.706	413.002	486.794	383.955	561.878	480.812	435.755	0.283017	0.263583	1.07373	0.282945	0.999991
663	NC_005109.4	-	14090130	14090118	14090154	Ndufb10	rna42370	gene23311	protein_coding	o	488.547	455.886	568.738	381.877	440.847	365.355	288.319	443.176	429.093	-0.302154	0.293206	-1.03052	0.302767	0.999991
664	NC_005101.4	-	95424252	95424240	95424290	Stmn2	rna10272	gene5778	protein_coding	o	137.032	527.055	365.513	451.309	206.143	651.661	454.62	347.167	392.562	0.162205	0.465788	0.348239	0.727661	0.999991
665	NC_005110.4	+	28410072	28410023	28410245	-	-	-	-	u	282.007	446.486	455.429	442.929	423.461	429.127	362.121	486.188	415.969	0.0608452	0.290277	0.209611	0.833971	0.999991
666	NC_005109.4	-	57265461	57265450	57265492	Slc25a11	rna44069	gene24203	protein_coding	p	571.958	314.89	353.816	421.381	666.859	416.505	359.169	511.534	452.014	0.236549	0.335703	0.704639	0.481035	0.999991
667	NC_005118.4	-	11512543	11512425	11512554	Gnao1	rna64118	gene35232	protein_coding	p	270.091	494.827	520.49	441.732	198.692	437.098	592.383	317.981	409.162	-0.161476	0.396045	-0.407722	0.683477	0.999991
668	NC_005103.4	+	145574442	145574173	145574652	Brk1	rna21764	gene12385	protein_coding	o	282.007	396.802	372.823	401.031	311.697	595.862	360.153	530.736	406.389	0.307543	0.325003	0.946277	0.344007	0.999991
669	NC_005105.4	-	25666652	25666637	25666707	Bre	rna27836	gene15563	protein_coding	o	544.154	345.104	441.539	448.915	537.709	350.077	431.003	470.827	446.166	0.00982763	0.292409	0.0336092	0.973189	0.999991
670	NC_005107.4	-	117358343	117358331	117358373	Wdr6	rna38023	gene21239	protein_coding	o	285.979	448.5	322.382	433.352	412.285	556.005	448.715	412.453	414.959	0.294025	0.294638	0.997922	0.318317	0.999991
671	NC_005100.4	-	89177995	89177982	89178016	Tmem147	rna2794	gene1678	protein_coding	o	131.074	474.685	293.141	263.363	204.901	866.889	294.223	468.523	374.6	0.65596	0.499386	1.31353	0.189004	0.999991
672	NC_005109.4	+	94451819	94451802	94452063	Psmc5	rna46061	gene25208	protein_coding	o	327.684	458.571	329.693	384.271	450.782	573.94	388.69	404.773	414.8	0.276059	0.287934	0.958759	0.33768	0.999991
673	NC_005100.4	-	104036573	104036562	104036575	Mrgprb2	rna3678	gene2075	protein_coding	i	780.484	296.762	565.814	505.179	603.526	295.606	296.192	388.643	466.526	-0.438379	0.390301	-1.12318	0.26136	0.999991
674	NC_005113.4	-	66064324	66064324	66064326	Kcnip4	rna54350	gene29732	protein_coding	i	379.319	461.929	567.276	514.756	381.239	692.183	190.901	105.994	411.699	-0.48912	0.500254	-0.977744	0.328201	0.999991
675	NC_005117.4	+	56920359	56920076	56920659	-	-	-	-	u	508.407	370.617	282.176	413.002	563.787	498.876	389.674	471.595	437.267	0.293171	0.302508	0.969134	0.332478	0.999991
676	NC_005100.4	-	197771196	197771180	197771213	Spns1	rna5898	gene3382	protein_coding	o	498.477	363.903	340.658	368.709	417.252	540.062	422.147	466.218	427.178	0.236468	0.277121	0.853302	0.393492	0.999991
677	NC_005102.4	+	11641464	11641450	11641755	St6galnac6	rna14491	gene8050	protein_coding	o	708.989	363.232	403.526	476.448	596.075	359.377	403.45	361.761	459.107	-0.179744	0.339723	-0.529091	0.596742	0.999991
678	NC_005104.4	-	156677637	156677607	156677650	Pink1	rna26507	gene14907	protein_coding	i	591.817	396.131	447.388	365.117	817.119	331.477	285.367	380.963	451.922	0.01148	0.396395	0.028961	0.976896	0.999991
679	NC_005118.4	-	37481778	37481763	37481808	Atp6v0d1	rna64944	gene35674	protein_coding	o	504.435	335.032	357.472	341.175	610.977	474.962	247.974	585.269	432.162	0.321766	0.358888	0.896563	0.369952	0.999991
680	NC_005109.4	-	72159869	72159860	72159911	Ggnbp2	rna44809	gene24624	protein_coding	c	683.172	549.883	277.79	360.329	476.86	336.127	340.473	509.23	441.733	-0.168029	0.365889	-0.459236	0.646065	0.999991
681	NC_005104.4	+	76107253	76107223	76107657	-	-	-	-	u	341.586	495.499	328.962	266.955	341.501	493.562	379.834	572.98	402.61	0.31848	0.328274	0.970163	0.331965	0.999991
682	NC_005109.4	-	104629555	104629552	104629680	Wbp2	rna46424	gene25384	protein_coding	o	272.077	406.202	409.374	417.79	343.985	603.833	346.377	416.294	401.991	0.18288	0.321342	0.569112	0.56928	0.999991
683	NC_005109.4	+	109280867	109280834	109281135	LOC690871	rna46700	gene25516	protein_coding	o	337.614	385.388	345.775	362.723	420.978	485.591	382.786	565.299	410.769	0.373614	0.269319	1.38725	0.165365	0.999991
684	NC_005117.4	+	25222136	25222101	25222508	Bin1	rna62559	gene34335	protein_coding	o	405.137	380.017	421.802	432.155	533.984	544.048	253.878	382.499	419.19	0.0649386	0.32635	0.198984	0.842275	0.999991
685	NC_005100.4	+	174135281	174135252	174135449	Rpl27a	rna5353	gene3115	protein_coding	c	236.33	508.927	333.348	372.3	413.527	589.219	336.537	388.643	397.354	0.249008	0.343766	0.724353	0.468849	0.999991
686	NC_005101.4	-	116199904	116199744	116199929	Sec62	rna10509	gene5922	protein_coding	e	838.077	429.701	222.963	294.488	945.027	336.791	288.319	411.685	470.881	0.15277	0.498532	0.30644	0.75927	0.999991
687	NC_005113.4	-	82042094	82042073	82042112	Nat8l	rna54745	gene29901	protein_coding	c	282.007	465.957	399.14	389.06	290.586	561.983	387.706	400.932	397.171	0.093948	0.322884	0.290965	0.771078	0.999991
688	NC_005103.4	+	85276034	85275997	85276245	Gars	rna20597	gene11700	protein_coding	o	325.698	351.818	412.298	468.069	285.619	544.048	458.556	413.99	407.512	0.128338	0.312179	0.411104	0.680996	0.999991
689	NC_005102.4	-	94349779	94349771	94349797	Hipk3	rna16229	gene9268	protein_coding	c	577.916	308.848	301.183	422.579	640.78	405.877	469.38	442.408	446.121	0.285958	0.333432	0.85762	0.391102	0.999991
690	NC_005100.4	+	226496185	226496116	226496618	Syt7	rna7607	gene4173	protein_coding	c	446.842	443.801	381.595	444.126	382.481	500.869	398.53	344.095	417.793	-0.0765238	0.267914	-0.285628	0.775163	0.999991
691	NC_005108.4	+	10042395	10042374	10042594	Gtf2f1	rna38941	gene21675	protein_coding	o	639.48	392.774	394.023	371.103	625.879	355.391	343.425	417.83	442.488	-0.0427755	0.339105	-0.126142	0.899619	0.999991
692	NC_005106.4	-	121297358	121297335	121297367	Rpl3	rna33629	gene18916	protein_coding	o	210.512	574.054	440.808	330.401	274.443	472.969	386.722	399.396	386.163	-0.0243146	0.371819	-0.0653936	0.947861	0.999991
693	NC_005111.4	-	46413997	46413990	46414013	Cit	rna50404	gene27595	protein_coding	c	881.768	281.991	387.444	415.396	992.216	246.449	338.505	331.038	484.351	-0.04218	0.503328	-0.0838021	0.933214	0.999991
694	NC_005120.4	-	77298918	77298878	77298940	LOC100359505	gene38081	gene38081	pseudogene	o	204.554	384.045	291.679	271.743	311.697	835.668	294.223	440.872	379.31	0.706838	0.407376	1.7351	0.0827231	0.999991
695	NC_005113.4	+	100247240	100247208	100247415	Cnrip1	rna55278	gene30118	protein_coding	o	415.066	425.673	359.665	383.074	439.605	465.662	411.322	423.974	415.505	0.137279	0.247008	0.555767	0.57837	0.999991
696	NC_005104.4	-	135149338	135149330	135149344	Mast2	rna25371	gene14401	protein_coding	c	436.912	357.86	386.713	409.41	509.147	417.834	333.584	514.607	420.758	0.159587	0.279892	0.570175	0.568559	0.999991
697	NC_005106.4	-	117413151	117413145	117413161	Sharpin	rna33279	gene18776	protein_coding	c	816.231	339.732	344.313	439.338	884.178	229.178	414.275	324.893	474.017	-0.065055	0.468797	-0.13877	0.889632	0.999991
698	NC_005104.4	-	109499414	109499407	109499425	Elavl2	rna24804	gene14104	protein_coding	c	466.702	378.003	283.638	411.805	571.238	512.826	385.738	374.05	423	0.26216	0.306166	0.856268	0.39185	0.999991
699	NC_005100.4	-	170466392	170466386	170466431	Arfip2	rna5212	gene2988	protein_coding	c	621.607	333.69	384.519	351.949	683.002	348.748	326.696	462.378	439.074	0.108295	0.36396	0.297545	0.76605	0.999991
700	NC_005107.4	-	50258025	50258014	50258048	Pafah1b2	rna36062	gene20297	protein_coding	c	329.67	403.516	418.878	428.564	329.083	505.519	431.987	364.833	401.506	0.0448552	0.281933	0.159099	0.873591	0.999991
701	NC_005100.4	-	198228386	198228345	198228398	Aldoa	rna5970	gene3414	protein_coding	o	554.084	244.392	513.18	280.123	396.141	409.198	137.763	751.94	410.853	0.0928219	0.486803	0.190676	0.848779	0.999991
702	NC_005117.4	-	1178787	1178766	1178811	Usp14	rna62200	gene34123	protein_coding	o	361.445	365.917	346.506	472.857	475.618	577.926	371.961	311.836	410.508	0.168123	0.311319	0.540034	0.589173	0.999991
703	NC_005119.4	+	7289088	7289006	7289298	-	-	-	-	u	575.93	281.991	515.373	511.164	586.14	275.013	530.389	273.433	443.679	-0.178565	0.386559	-0.461934	0.644129	0.999991
704	NC_005105.4	-	13886776	13886733	13886806	Nrxn1	rna27711	gene15468	protein_coding	o	641.466	294.077	385.251	458.492	841.956	377.313	432.971	203.538	454.383	0.0616306	0.444958	0.138509	0.889838	0.999991
705	NC_005119.4	-	21645197	21645193	21645240	Tmem26	rna66930	gene36833	protein_coding	i	182.709	476.028	326.037	411.805	408.56	499.541	317.84	480.044	387.82	0.285004	0.361115	0.789234	0.429975	0.999991
706	NC_005108.4	-	119307292	119307242	119307320	Myl12b	rna41716	gene22972	protein_coding	c	446.842	388.745	351.623	351.949	475.618	366.02	342.441	579.893	412.891	0.198362	0.297972	0.665707	0.505598	0.999991
707	NC_005109.4	+	37609663	37609484	37610095	Skp1	rna43104	gene23704	protein_coding	o	266.119	464.614	458.353	462.083	319.148	415.841	463.476	318.749	396.048	-0.12526	0.31565	-0.396832	0.691491	0.999991
708	NC_005106.4	-	14517811	14517800	14517819	-	-	-	-	u	730.835	363.903	427.65	420.184	427.187	316.199	295.207	492.333	434.187	-0.33996	0.344453	-0.986954	0.323665	0.999991
709	NC_005118.4	+	54252206	54252191	54252383	Cox4i1	rna65456	gene35921	protein_coding	o	272.077	300.119	795.356	318.43	199.933	336.791	233.214	585.269	380.149	-0.315951	0.467389	-0.675991	0.499046	0.999991
710	NC_005117.4	+	76731646	76731593	76732012	RGD1560212	rna63670	gene34995	protein_coding	o	599.761	413.587	304.107	319.627	599.8	300.256	391.642	513.839	430.327	0.143649	0.358381	0.400827	0.688547	0.999991
711	NC_005120.4	-	14888409	14888395	14888419	RGD1560784	rna67777	gene37352	transcribed_pseudogene	p	331.656	317.576	376.478	507.573	289.345	454.369	578.607	396.324	406.491	0.165295	0.329397	0.501811	0.615801	0.999991
712	NC_005101.4	-	184231799	184231767	184231828	Fbxw7	rna11433	gene6499	protein_coding	c	119.158	401.502	330.424	323.219	194.966	945.274	195.821	337.183	355.943	0.509279	0.543458	0.937108	0.348703	0.999991
713	NC_005116.4	-	9560740	9560728	9560773	Tmed9	rna60233	gene32983	protein_coding	c	341.586	384.717	212.728	313.642	563.787	612.469	311.936	464.682	400.693	0.641828	0.33934	1.8914	0.0585707	0.999991
714	NC_005102.4	+	6782685	6782586	6782808	Olfm1	rna14148	gene7926	protein_coding	o	619.621	337.047	352.354	402.228	726.466	341.441	403.45	347.936	441.318	0.0900936	0.370262	0.243324	0.807754	0.999991
715	NC_005100.4	-	65660474	65660447	65660489	Rps5	rna1435	gene889	protein_coding	o	176.751	510.941	421.802	432.155	197.45	585.233	346.377	314.909	373.202	-0.0961643	0.429853	-0.223714	0.822979	0.999991
716	NC_005106.4	-	12875536	12875514	12875560	Bsg	rna31228	gene17601	protein_coding	o	204.554	222.907	241.969	369.906	476.86	236.485	847.246	696.639	412.071	1.11807	0.420171	2.66098	0.00779136	0.999991
717	NC_005108.4	-	11070321	11070309	11070339	-	-	-	-	u	645.438	313.547	331.886	384.271	612.218	373.991	303.08	496.173	432.576	0.095586	0.366695	0.260669	0.794348	0.999991
718	NC_005100.4	-	98472776	98472743	98472790	Etfb	rna3101	gene1841	protein_coding	o	397.193	445.143	307.031	384.271	392.416	425.141	282.415	559.155	399.096	0.114703	0.315488	0.363573	0.716177	0.999991
719	NC_005114.4	-	60722138	60722121	60722169	Akap11	rna57336	gene31397	protein_coding	o	349.53	390.759	313.61	372.3	330.325	433.112	573.687	440.872	400.524	0.318523	0.289222	1.10131	0.270761	0.999991
720	NC_005101.4	-	196392938	196392931	196392962	Mllt11	rna12141	gene6838	protein_coding	c	154.905	516.313	331.886	421.381	171.372	728.054	311.936	281.114	364.62	0.066082	0.491251	0.134518	0.892993	0.999991
721	NC_005101.4	+	38357089	38356958	38357414	-	-	-	-	u	442.87	439.772	456.16	423.776	393.658	706.132	237.15	69.1263	396.081	-0.325606	0.53132	-0.612825	0.539992	0.999991
722	NC_005112.4	+	76370669	76370659	76370916	Astn1	rna51903	gene28363	protein_coding	o	353.502	449.172	334.81	493.208	382.481	328.82	539.246	380.194	407.679	-0.00129205	0.302853	-0.00426625	0.996596	0.999991
723	NC_005114.4	+	105795847	105795828	105796054	Mbnl2	rna57747	gene31666	protein_coding	c	428.968	406.873	522.683	444.126	463.2	538.069	329.648	102.153	404.465	-0.331617	0.450008	-0.736913	0.461176	0.999991
724	NC_005106.4	+	41221108	41220948	41221462	Atp2b1	rna31935	gene18061	protein_coding	c	349.53	366.589	347.237	381.877	411.043	462.341	470.364	410.149	399.891	0.279301	0.24627	1.13412	0.256743	0.999991
725	NC_005103.4	-	147715478	147715446	147715501	Rpl32	rna21816	gene12418	protein_coding	o	397.193	331.675	247.087	712.278	526.533	424.477	530.389	250.391	427.503	0.0373486	0.408267	0.0914807	0.927111	0.999991
726	NC_005106.4	-	11392434	11392431	11392449	Dapk3	rna30981	gene17502	protein_coding	c	480.603	296.091	405.719	282.517	407.318	377.977	241.086	719.681	401.374	0.255888	0.390486	0.655306	0.512271	0.999991
727	NC_005101.4	+	187741699	187741685	187741900	Paqr6	rna11617	gene6576	protein_coding	o	518.337	414.259	355.278	420.184	450.782	335.463	281.431	519.983	411.965	-0.10331	0.314429	-0.328563	0.742486	0.999991
728	NC_005100.4	-	221115992	221115862	221116013	Scyl1	rna7245	gene4015	protein_coding	o	532.238	288.705	404.988	413.002	486.794	342.106	437.891	458.538	420.533	0.0771883	0.30446	0.253525	0.799862	0.999991
729	NC_005108.4	+	54284877	54284856	54285068	Gls	rna40132	gene22245	protein_coding	o	220.442	415.601	388.906	344.767	206.143	453.041	508.741	481.58	377.402	0.265921	0.374534	0.710004	0.477702	0.999991
730	NC_005109.4	+	38899212	38899195	38899515	Sept8	rna43142	gene23729	protein_coding	c	824.175	248.421	556.311	386.665	769.93	229.178	322.76	288.794	453.279	-0.322963	0.477552	-0.676289	0.498857	0.999991
731	NC_005115.4	-	18870690	18870679	18870723	-	-	-	-	u	534.224	367.931	292.41	393.848	596.075	354.727	329.648	486.956	419.478	0.156678	0.334756	0.468036	0.639759	0.999991
732	NC_005103.4	-	63009588	63009556	63009609	-	-	-	-	u	434.926	439.772	320.189	342.372	470.651	359.377	469.38	406.309	405.372	0.150309	0.276913	0.542803	0.587265	0.999991
733	NC_005103.4	-	66446161	66446157	66446215	Hipk2	rna20061	gene11357	protein_coding	c	611.677	344.432	277.79	392.651	799.734	324.17	369.009	374.818	436.785	0.201414	0.401616	0.50151	0.616012	0.999991
734	NC_005109.4	+	70101362	70101273	70101621	Cct6b	rna44682	gene24560	protein_coding	i	222.428	393.445	280.714	344.767	255.815	564.64	355.233	563.763	372.601	0.485597	0.363991	1.33409	0.182174	0.999991
735	NC_005109.4	-	104722998	104722988	104723027	Acox1	rna46449	gene25390	protein_coding	p	464.716	353.16	272.673	407.016	505.422	374.655	432.971	484.652	411.908	0.26684	0.294135	0.907202	0.3643	0.999991
736	NC_005120.4	-	135005171	135005164	135005193	Zdhhc9	rna69533	gene38619	protein_coding	c	695.087	302.133	399.871	466.871	608.493	324.17	366.057	328.734	436.427	-0.193584	0.369789	-0.5235	0.600627	0.999991
737	NC_005105.4	+	75430264	75430237	75430561	Rps10l1	rna28705	gene16031	protein_coding	o	202.568	352.489	264.631	347.161	335.292	620.44	262.735	586.805	371.515	0.62837	0.378637	1.65956	0.0970039	0.999991
738	NC_005108.4	-	81560835	81560827	81560857	Aamp	rna40668	gene22499	protein_coding	o	750.694	298.776	334.81	389.06	721.499	290.292	416.243	354.848	444.528	0.0102625	0.416206	0.0246574	0.980328	0.999991
739	NC_005115.4	+	26875885	26875862	26876233	Msmo1	rna58874	gene32201	protein_coding	o	232.358	443.801	303.376	320.824	419.736	500.205	342.441	466.218	378.62	0.406918	0.312949	1.30027	0.193508	0.999991
740	NC_005100.4	-	219141289	219141272	219141305	Ndufs8	rna6994	gene3889	protein_coding	o	542.168	299.448	509.525	275.334	542.676	520.133	250.926	294.171	404.298	-0.0151997	0.39082	-0.0388917	0.968977	0.999991
741	NC_005109.4	+	10989441	10989423	10989665	Cdip1	rna42063	gene23157	protein_coding	c	274.063	396.802	320.92	366.315	365.096	536.74	319.808	461.61	380.169	0.308535	0.302734	1.01916	0.308125	0.999991
742	NC_005112.4	-	52193523	52193509	52193543	Shisa4	rna51402	gene28117	protein_coding	p	313.782	393.445	568.007	371.103	361.37	478.948	285.367	279.577	381.45	-0.230586	0.33152	-0.695542	0.486716	0.999991
743	NC_005112.4	-	100878648	100878640	100878678	Capn2	rna52744	gene28825	protein_coding	o	152.919	420.301	423.995	428.564	201.175	411.191	397.546	513.071	368.595	0.0926536	0.418879	0.221194	0.824941	0.999991
744	NC_005107.4	-	50256970	50256963	50256981	Pafah1b2	rna36062	gene20297	protein_coding	c	482.589	322.276	312.148	418.987	346.468	472.969	331.616	509.998	399.632	0.118007	0.309127	0.381742	0.702653	0.999991
745	NC_005109.4	+	15188723	15188699	15189008	Fbxl16	rna42514	gene23370	protein_coding	o	240.302	361.889	372.823	465.674	262.025	486.919	563.846	317.981	383.932	0.177355	0.361462	0.490661	0.623666	0.999991
746	NC_005114.4	-	43643900	43643880	43643948	Bnip3l	rna56861	gene31162	protein_coding	o	260.161	410.902	416.685	417.79	293.07	385.284	453.636	422.438	382.496	0.0433351	0.304419	0.142353	0.886801	0.999991
747	NC_005103.4	+	147195103	147195088	147195303	Syn2	rna21795	gene12406	protein_coding	o	683.172	327.647	343.582	374.694	712.806	342.106	319.808	349.472	431.661	-0.00186491	0.395023	-0.00472102	0.996233	0.999991
748	NC_005120.4	+	106313852	106313780	106314185	Gprasp1	rna69078	gene38300	protein_coding	o	329.67	395.459	289.486	350.752	345.227	470.312	426.083	475.435	385.303	0.331301	0.274051	1.2089	0.2267	0.999991
749	NC_005106.4	-	125461408	125461393	125461441	Ldoc1l	rna33854	gene19022	protein_coding	o	496.491	322.947	327.499	438.141	339.018	366.684	426.083	518.447	404.414	0.0626225	0.303207	0.206534	0.836374	0.999991
750	NC_005104.4	-	134919112	134919097	134919148	Uqcrh	rna25350	gene14392	protein_coding	c	345.558	406.873	438.615	193.931	115.489	579.254	294.223	512.302	360.781	0.117166	0.479172	0.244518	0.806829	0.999991
751	NC_005109.4	-	15164327	15164320	15164340	Metrn	rna42512	gene23368	protein_coding	p	573.944	306.833	570.2	460.886	438.363	215.228	429.035	331.806	415.787	-0.43485	0.354933	-1.22516	0.220514	0.999991
752	NC_005100.4	-	47912999	47912959	47913011	Sod2	rna826	gene531	protein_coding	p	228.386	391.431	249.28	457.295	470.651	581.247	309.968	355.616	380.484	0.371239	0.360166	1.03074	0.302661	0.999991
753	NC_005107.4	-	31041498	31041455	31041544	Ntm	rna35408	gene19877	protein_coding	c	426.982	451.186	466.394	335.19	438.363	297.599	354.249	369.442	392.426	-0.204941	0.279894	-0.732208	0.464042	0.999991
754	NC_005119.4	+	31292453	31292434	31292760	Ppa1	rna67165	gene36950	protein_coding	o	264.133	463.271	237.583	306.459	521.565	574.605	319.808	331.806	377.404	0.456704	0.356277	1.28188	0.199885	0.999991
755	NC_005106.4	-	123982727	123982706	123982744	Rrp7a	rna33773	gene18995	protein_coding	c	397.193	320.933	713.481	519.544	341.501	425.141	287.335	114.442	389.946	-0.740703	0.433617	-1.7082	0.0875997	0.999991
756	NC_005109.4	-	13072250	13072234	13072279	Paqr4	rna42219	gene23256	protein_coding	o	595.789	323.619	345.775	481.237	658.166	257.077	289.303	438.568	423.692	-0.0865998	0.390307	-0.221876	0.824411	0.999991
757	NC_005117.4	+	74164962	74164937	74165227	Atp5a1	rna63626	gene34960	protein_coding	p	176.751	415.601	377.94	343.57	238.43	559.99	366.057	397.092	359.429	0.246379	0.382607	0.643947	0.51961	0.999991
758	NC_005118.4	+	53742182	53742087	53742433	RGD1304884	rna65411	gene35896	protein_coding	o	204.554	474.685	400.602	404.622	221.044	462.341	408.37	344.863	365.135	-0.0497856	0.37015	-0.134501	0.893006	0.999991
759	NC_005100.4	-	214151342	214151335	214151372	Rnh1	rna6611	gene3753	protein_coding	c	613.663	298.105	313.61	329.204	612.218	423.812	355.233	361.761	413.451	0.177295	0.358882	0.49402	0.621292	0.999991
760	NC_005100.4	+	214146166	214146147	214146457	Ptdss2	rna6610	gene3752	protein_coding	e	504.435	279.306	363.32	341.175	674.31	388.605	331.616	380.194	407.87	0.256039	0.348427	0.734844	0.462435	0.999991
761	NC_005109.4	+	17640700	17640558	17640866	Fbxw11	rna42653	gene23441	protein_coding	o	301.867	363.903	455.429	458.492	365.096	346.756	427.067	353.312	383.99	-0.0850704	0.280584	-0.303191	0.761745	0.999991
762	NC_005120.4	-	138675330	138675319	138675349	Hs6st2	rna69664	gene38655	protein_coding	c	383.291	341.075	271.211	289.7	389.932	426.469	390.658	566.067	382.3	0.467654	0.287944	1.62411	0.104352	0.999991
763	NC_005106.4	+	2470674	2470636	2471091	Naca	rna30581	gene17188	protein_coding	o	188.667	319.59	456.16	430.958	165.162	649.004	281.431	344.095	354.383	0.0446851	0.452319	0.0987911	0.921304	0.999991
764	NC_005109.4	-	65304901	65304895	65304918	Flot2	rna44511	gene24454	protein_coding	c	575.93	273.934	322.382	316.036	670.584	368.677	276.511	469.291	409.168	0.265607	0.385322	0.689311	0.490628	0.999991
765	NC_005100.4	+	225046149	225046121	225046461	Bscl2	rna7514	gene4127	protein_coding	o	252.217	431.715	275.597	316.036	238.43	572.612	285.367	486.188	357.27	0.310779	0.375921	0.826714	0.408399	0.999991
766	NC_005100.4	+	72867938	72867922	72868304	Syt5	rna1738	gene1121	protein_coding	o	230.372	481.399	323.844	339.978	365.096	572.612	290.287	288.794	361.548	0.138279	0.363963	0.379926	0.704	0.999991
767	NC_005106.4	-	55600888	55600870	55600909	Atxn7l3b	rna32087	gene18146	protein_coding	o	182.709	338.389	321.651	486.025	202.417	419.162	484.14	503.086	367.197	0.274641	0.403327	0.68094	0.495909	0.999991
768	NC_005109.4	-	45535623	45535603	45535652	Guk1	rna43395	gene23896	protein_coding	o	270.091	389.416	356.009	341.175	265.75	609.812	328.664	329.502	361.303	0.17652	0.347534	0.507923	0.611508	0.999991
769	NC_005102.4	-	143017724	143017717	143017743	Napb	rna17467	gene9945	protein_coding	c	504.435	461.929	391.099	175.975	217.319	304.906	210.581	698.175	370.552	-0.0979835	0.47277	-0.207254	0.835811	0.999991
770	NC_005100.4	-	48640407	48640402	48640408	Map3k4	rna860	gene552	protein_coding	i	133.06	123.539	801.204	758.965	538.951	206.592	595.335	36.8673	399.314	-0.400835	0.730189	-0.548948	0.583041	0.999991
771	NC_005101.4	-	29679271	29679249	29679313	Map1b	rna9457	gene5231	protein_coding	c	591.817	409.559	563.621	222.662	537.709	189.985	153.508	488.492	394.669	-0.384514	0.478625	-0.803372	0.42176	0.999991
772	NC_005104.4	-	142844010	142843995	142844023	RGD1559909	rna25788	gene14596	protein_coding	p	393.221	469.314	284.369	305.262	429.671	451.048	272.575	407.845	376.663	0.104824	0.316986	0.33069	0.740878	0.999991
773	NC_005109.4	-	13091335	13091305	13091358	Flywch1	rna42229	gene23259	protein_coding	o	351.516	465.286	508.063	280.123	336.534	316.863	275.527	419.366	369.16	-0.253894	0.316635	-0.801849	0.42264	0.999991
774	NC_005118.4	+	17300056	17299921	17300534	Aktip	rna64233	gene35302	protein_coding	o	488.547	373.974	283.638	341.175	500.454	480.276	326.696	330.27	390.629	0.142058	0.317102	0.44799	0.654161	0.999991
775	NC_005111.4	-	6491514	6491510	6491523	-	-	-	-	u	454.786	252.449	277.059	693.125	646.99	237.813	619.936	224.276	425.804	0.0439855	0.474572	0.0926846	0.926154	0.999991
776	NC_005113.4	+	107780105	107780084	107780337	Cct4	rna55399	gene30193	protein_coding	o	127.102	373.974	328.962	434.55	203.659	640.369	435.923	274.969	352.438	0.296169	0.461902	0.641194	0.521397	0.999991
777	NC_005100.4	+	261165812	261165757	261166173	Pgam1	rna8434	gene4669	protein_coding	o	490.533	352.489	386.713	339.978	413.527	380.634	370.977	368.673	387.941	-0.0304188	0.266846	-0.113994	0.909243	0.999991
778	NC_005104.4	-	111720249	111720249	111720253	-	-	-	-	u	889.712	299.448	596.517	647.635	483.069	221.87	339.489	21.506	437.406	-1.19143	0.635121	-1.87591	0.060668	0.999991
779	NC_005106.4	-	32980278	32980257	32980294	LOC102548260	rna31794	gene17973	lncRNA	c	363.431	402.173	379.402	360.329	204.901	380.634	446.747	423.206	370.103	-0.047623	0.323613	-0.14716	0.883005	0.999991
780	NC_005109.4	-	90383347	90383312	90383358	Fam171a2	rna45825	gene25113	protein_coding	c	589.831	358.532	311.417	248.998	778.623	397.905	228.294	318.749	404.044	0.193538	0.439291	0.440569	0.659525	0.999991
781	NC_005118.4	-	26133116	26133112	26133136	Asna1	rna64597	gene35469	protein_coding	c	554.084	290.048	385.251	283.714	464.442	425.805	258.799	448.553	388.837	0.0823102	0.349306	0.235639	0.813713	0.999991
782	NC_005120.4	-	10400431	10400349	10400460	Ddx3x	rna67683	gene37297	protein_coding	o	399.179	378.674	321.651	351.949	345.227	524.119	359.169	308.764	373.592	0.0853002	0.293641	0.290492	0.77144	0.999991
783	NC_005115.4	-	21081767	21081758	21081791	Hapln4	rna58711	gene32120	protein_coding	c	337.614	386.059	309.224	304.065	456.991	419.827	301.112	463.914	372.351	0.295884	0.283657	1.04311	0.2969	0.999991
784	NC_005114.4	+	8178256	8178238	8178560	Ube2e1	rna55767	gene30380	protein_coding	o	317.754	367.26	293.141	333.993	264.508	504.191	381.802	447.785	363.804	0.286124	0.305414	0.936841	0.34884	0.999991
785	NC_005115.4	+	28267108	28267081	28267477	-	-	-	-	u	855.951	300.119	357.472	450.112	347.71	241.135	436.907	383.267	421.584	-0.47492	0.396431	-1.19799	0.230921	0.999991
786	NC_005108.4	-	27436259	27436241	27436309	LOC108348061	rna39593	gene21996	protein_coding	o	240.302	308.848	399.14	511.164	255.815	567.297	296.192	316.445	361.9	-0.0235403	0.378389	-0.0622118	0.950394	0.999991
787	NC_005103.4	+	26419443	26419420	26419801	Cdk14	rna19402	gene10973	protein_coding	o	327.684	369.274	445.926	430.958	280.652	361.37	384.754	368.673	371.161	-0.174503	0.274537	-0.635626	0.52502	0.999991
788	NC_005115.4	+	20674845	20674797	20675124	RGD1566239	rna58658	gene32097	protein_coding	o	502.449	304.819	377.94	324.416	538.951	331.477	278.479	472.363	391.362	0.105187	0.337011	0.312117	0.754952	0.999991
789	NC_005105.4	-	33360824	33360821	33360824	LOC103692595	rna28102	gene15691	lncRNA	i	450.814	320.261	443.002	398.636	398.625	198.621	409.354	496.941	389.532	-0.100747	0.349023	-0.288653	0.772847	0.999991
790	NC_005106.4	+	121482774	121482750	121483109	Atf4	rna33643	gene18922	protein_coding	o	141.003	408.887	266.824	348.358	239.672	621.104	405.418	344.863	347.016	0.464703	0.417414	1.11329	0.265584	0.999991
791	NC_005117.4	-	17690209	17690189	17690258	Celf4	rna62473	gene34284	protein_coding	c	440.884	323.619	309.224	342.372	499.213	375.32	485.124	345.631	390.173	0.2705	0.288784	0.936685	0.34892	0.999991
792	NC_005103.4	-	39672515	39672514	39672515	Vwde	rna19579	gene11101	protein_coding	i	240.302	406.873	263.169	454.9	531.5	260.399	443.795	443.944	380.61	0.295827	0.356903	0.828872	0.407177	0.999991
793	NC_005109.4	-	31278749	31278733	31278763	Cyfip2	rna42841	gene23554	protein_coding	o	246.26	416.273	407.181	410.607	253.332	359.377	506.773	310.3	363.763	-0.0529458	0.338694	-0.156324	0.875778	0.999991
794	NC_005100.4	+	166626148	166626132	166626467	Pde2a	rna4913	gene2748	protein_coding	o	474.645	246.407	336.272	424.973	432.154	472.969	368.025	346.399	387.731	0.132283	0.314903	0.420076	0.67443	0.999991
795	NC_005106.4	-	75596696	75596692	75596699	Ywhaz	rna32548	gene18406	protein_coding	i	1545.08	250.435	657.192	326.81	607.251	124.221	203.693	72.9666	473.456	-1.46383	0.654466	-2.23667	0.0253077	0.999991
796	NC_005102.4	-	8662581	8662572	8662589	Zer1	rna14311	gene7971	protein_coding	c	391.235	329.661	395.485	354.343	418.494	360.705	442.811	338.719	378.932	0.0856979	0.261477	0.327746	0.743104	0.999991
797	NC_005112.4	-	72913380	72913315	72913435	-	-	-	-	u	371.375	249.764	262.438	302.868	553.853	359.377	504.805	473.899	384.797	0.676922	0.293391	2.30723	0.021042	0.999991
798	NC_005109.4	+	85785132	85785099	85785411	Lasp1	rna45375	gene24889	protein_coding	o	426.982	333.69	290.948	453.703	419.736	368.677	386.722	390.179	383.83	0.0593647	0.279346	0.212513	0.831707	0.999991
799	NC_005105.4	+	28544758	28544738	28545029	Dnajc27	rna27992	gene15641	protein_coding	o	409.109	303.476	288.024	356.738	447.056	384.62	426.083	428.583	380.461	0.31701	0.26645	1.18976	0.234142	0.999991
800	NC_005106.4	+	144503617	144503577	144503730	LOC103693000	gene19406	gene19406	pseudogene	c	575.93	385.388	423.995	280.123	516.598	211.242	260.767	461.61	389.456	-0.198932	0.390057	-0.510007	0.610047	0.999991
801	NC_005104.4	+	124765508	124765479	124765742	Plpp3	rna25066	gene14238	protein_coding	o	331.656	390.759	293.872	403.425	419.736	401.891	419.195	321.053	372.698	0.136741	0.273619	0.499749	0.617252	0.999991
802	NC_005102.4	-	11338089	11338067	11338103	Dnm1	rna14457	gene8039	protein_coding	o	357.474	328.318	407.181	348.358	342.743	421.155	301.112	410.917	364.657	0.0351658	0.270668	0.129922	0.896628	0.999991
803	NC_005109.4	-	66870049	66870036	66870092	Evi2a	rna44591	gene24503	protein_coding	o	359.459	381.36	413.761	421.381	375.03	324.834	318.824	373.282	370.991	-0.180625	0.252337	-0.71581	0.474109	0.999991
804	NC_005102.4	+	150387333	150387268	150387516	Raly	rna17801	gene10149	protein_coding	o	633.523	291.391	464.201	300.474	654.44	265.713	263.719	331.806	400.658	-0.15587	0.415211	-0.375399	0.707364	0.999991
805	NC_005104.4	-	150719567	150719546	150719579	Atpif1	rna26155	gene14756	protein_coding	o	242.288	383.374	322.382	367.512	317.907	436.434	342.441	428.583	355.115	0.211135	0.293404	0.719604	0.471769	0.999991
806	NC_005118.4	-	14210563	14210549	14210570	Isx	rna64134	gene35249	protein_coding	i	236.33	337.718	730.295	468.069	353.919	400.562	308.984	35.3312	358.901	-0.691596	0.584412	-1.1834	0.236649	0.999991
807	NC_005101.4	+	137714185	137714174	137714220	LOC365790	gene6101	gene6101	pseudogene	p	1050.57	177.923	421.802	402.228	719.015	99.6424	383.77	331.806	448.345	-0.418611	0.585548	-0.714905	0.474668	0.999991
808	NC_005104.4	+	156563938	156563837	156564257	Eif4g3	rna26469	gene14900	protein_coding	o	492.519	316.233	258.052	391.454	608.493	348.084	339.489	373.282	390.951	0.197724	0.344243	0.574373	0.565715	0.999991
809	NC_005108.4	-	113300831	113300822	113300858	Vapa	rna41557	gene22901	protein_coding	o	85.3965	337.047	491.249	482.434	268.234	611.804	369.993	85.2557	341.427	-0.0661552	0.585138	-0.113059	0.909984	0.999991
810	NC_005101.4	+	183099783	183099763	183099915	Mnd1	rna11401	gene6481	protein_coding	i	256.189	360.546	635.992	355.541	259.541	680.225	149.572	19.2017	339.601	-0.537033	0.686115	-0.782717	0.433794	0.999991
811	NC_005109.4	-	62655710	62655636	62655749	Git1	rna44366	gene24382	protein_coding	p	262.147	379.345	291.679	306.459	334.05	390.598	544.166	367.905	359.544	0.398188	0.298396	1.33443	0.182063	0.999991
812	NC_005114.4	-	38191514	38191470	38191527	Micu2	rna56710	gene31088	protein_coding	o	450.814	288.705	360.396	313.642	404.834	365.355	342.441	463.914	373.763	0.161378	0.286936	0.562417	0.573832	0.999991
813	NC_005110.4	+	32264003	32263979	32264341	Mrps6	rna47231	gene25863	protein_coding	o	266.119	373.303	365.513	421.381	271.959	436.434	375.898	336.415	355.878	-0.00694391	0.299611	-0.0231764	0.98151	0.999991
814	NC_005109.4	+	46133576	46133548	46133834	Mprip	rna43439	gene23917	protein_coding	o	474.645	277.963	285.1	338.781	401.109	394.584	404.434	445.48	377.762	0.263752	0.293151	0.899714	0.368272	0.999991
815	NC_005116.4	-	6114600	6114591	6114612	Ntrk2	rna60083	gene32918	protein_coding	c	109.228	441.786	277.79	322.022	134.117	463.669	487.092	435.496	333.9	0.398787	0.487382	0.818222	0.41323	0.999991
816	NC_005108.4	-	82505532	82505523	82505544	Dnpep	rna40803	gene22545	protein_coding	c	363.431	320.933	340.658	380.68	331.567	461.676	328.664	370.978	362.323	0.0895233	0.269379	0.332331	0.739639	0.999991
817	NC_005100.4	+	198288612	198288596	198288901	Doc2a	rna5990	gene3418	protein_coding	o	432.94	346.446	293.872	341.175	432.154	393.92	304.064	423.974	371.068	0.139274	0.283084	0.491988	0.622728	0.999991
818	NC_005104.4	+	50393374	50393354	50393739	Cga	rna23831	gene13497	protein_coding	o	381.305	100.711	345.775	688.336	196.208	450.384	182.045	619.064	370.478	-0.0640275	0.551777	-0.116039	0.907622	0.999991
819	NC_005104.4	+	57284454	57284433	57284667	Chmp5	rna23881	gene13548	protein_coding	o	222.428	394.116	258.052	337.584	290.586	534.083	397.546	334.11	346.063	0.358652	0.33494	1.0708	0.284261	0.999991
820	NC_005108.4	+	17820513	17820371	17820744	Hsp90ab1	rna39386	gene21881	protein_coding	e	343.572	214.179	637.454	320.824	429.671	221.206	354.249	410.917	366.509	-0.100347	0.401879	-0.249695	0.802823	0.999991
821	NC_005101.4	+	54007735	54007690	54008089	Oxct1	rna9876	gene5483	protein_coding	o	252.217	408.887	230.273	325.613	315.423	316.199	359.169	601.399	351.147	0.386463	0.351771	1.09862	0.271934	0.999991
822	NC_005105.4	-	145222732	145222732	145222745	-	-	-	-	u	508.407	349.803	513.18	362.723	397.383	347.42	287.335	218.132	373.048	-0.471845	0.319553	-1.47658	0.139788	0.999991
823	NC_005101.4	+	112934956	112934855	112935185	-	-	-	-	u	323.712	347.118	335.541	353.146	248.364	443.077	355.233	410.917	352.139	0.102106	0.292679	0.348866	0.72719	0.999991
824	NC_005100.4	+	101792795	101792740	101793000	Lmtk3	rna3565	gene2015	protein_coding	p	448.828	318.919	285.831	349.555	577.447	316.199	330.632	410.917	379.791	0.222826	0.323693	0.688385	0.49121	0.999991
825	NC_005120.4	-	105617384	105617374	105617412	Armcx2	rna69054	gene38280	protein_coding	o	369.389	280.648	407.912	377.088	368.821	298.927	377.866	451.625	366.535	0.0619566	0.28642	0.216314	0.828743	0.999991
826	NC_005110.4	-	27130792	27130775	27130805	Cct8	rna47076	gene25755	protein_coding	c	496.491	281.991	394.023	350.752	550.127	306.234	371.961	309.532	382.639	0.0150016	0.33289	0.0450647	0.964056	0.999991
827	NC_005106.4	+	18696334	18696317	18696578	Ndufa7	rna31456	gene17785	protein_coding	o	383.291	282.663	278.521	377.088	319.148	484.926	387.706	380.194	361.692	0.255322	0.290528	0.878819	0.3795	0.999991
828	NC_005100.4	-	188689247	188689244	188689266	Gprc5b	rna5613	gene3245	protein_coding	c	222.428	432.387	295.334	476.448	284.377	414.512	453.636	230.421	351.193	-0.0470092	0.37016	-0.126997	0.898943	0.999991
829	NC_005108.4	-	100556390	100556373	100556420	Hdlbp	rna41406	gene22809	protein_coding	c	617.635	304.819	353.085	387.862	411.043	332.806	343.425	318.749	383.678	-0.238162	0.320215	-0.743759	0.457023	0.999991
830	NC_005111.4	-	39653965	39653949	39654011	Arpc3	rna50177	gene27484	protein_coding	c	212.498	437.758	231.735	344.767	300.521	520.798	232.23	416.294	337.075	0.25936	0.38033	0.681935	0.49528	0.999991
831	NC_005100.4	-	220727290	220727287	220727296	Cst6	rna7169	gene3982	protein_coding	c	514.365	192.023	383.788	342.372	507.905	275.677	340.473	489.26	380.733	0.174655	0.379977	0.459646	0.645771	0.999991
832	NC_005100.4	-	78277526	78277520	78277544	Sae1	rna1913	gene1242	protein_coding	c	228.386	387.402	369.168	329.204	218.561	431.784	387.706	360.993	339.15	0.0880705	0.333737	0.263892	0.791863	0.999991
833	NC_005107.4	+	52189712	52189701	52189910	Cadm1	rna36121	gene20320	protein_coding	o	409.109	304.819	244.894	311.248	455.749	395.912	410.338	403.237	366.913	0.395482	0.281086	1.40698	0.159434	0.999991
834	NC_005110.4	+	87217609	87217600	87217739	-	-	-	-	u	194.624	433.058	240.507	474.054	411.043	399.234	252.894	379.426	348.105	0.101368	0.375496	0.269956	0.787194	0.999991
835	NC_005102.4	-	176657104	176657065	176657121	Eef1a2	rna18841	gene10648	protein_coding	o	631.537	296.091	544.614	311.248	470.651	417.834	274.543	74.5028	377.627	-0.526802	0.507498	-1.03804	0.299252	0.999991
836	NC_005102.4	+	123094932	123094911	123095125	Mrps26	rna17060	gene9741	protein_coding	o	240.302	337.718	329.693	366.315	286.861	468.984	363.105	353.312	343.286	0.207107	0.298801	0.693127	0.48823	0.999991
837	NC_005108.4	+	31038383	31038310	31038740	Lmbrd1	rna39662	gene22024	protein_coding	o	194.624	427.687	271.942	348.358	212.352	437.762	440.843	359.457	336.628	0.220621	0.369888	0.596453	0.550873	0.999991
838	NC_005104.4	+	159531636	159531602	159531767	Atp13a2	rna26620	gene14966	protein_coding	o	228.386	331.675	500.753	349.555	301.763	364.691	308	346.399	341.403	-0.0983736	0.320246	-0.307182	0.758705	0.999991
839	NC_005114.4	+	75067721	75067609	75067945	LOC498555	rna57425	gene31461	transcribed_pseudogene	o	121.144	258.492	315.072	333.993	84.4439	621.769	253.878	555.314	318.013	0.558027	0.54393	1.02592	0.304931	0.999991
840	NC_005104.4	+	164977888	164977865	164978252	Fbxo2	rna26858	gene15095	protein_coding	o	436.912	333.69	401.333	367.512	468.167	294.942	282.415	349.472	366.805	-0.142113	0.295029	-0.481691	0.630026	0.999991
841	NC_005101.4	-	63557507	63557504	63557534	-	-	-	-	u	125.116	337.718	471.512	450.112	392.416	635.719	225.342	36.0993	334.254	-0.103989	0.637537	-0.163111	0.870431	0.999991
842	NC_005110.4	-	58795871	58795853	58795902	Lsamp	rna47780	gene26180	protein_coding	o	426.982	312.205	311.417	324.416	428.429	358.713	350.313	397.092	363.696	0.16195	0.269112	0.601795	0.547311	0.999991
843	NC_005111.4	-	23587382	23587369	23587396	Polr2j	rna49724	gene27255	protein_coding	c	448.828	320.933	339.927	360.329	394.9	345.427	307.016	394.02	363.922	-0.0249015	0.272292	-0.0914515	0.927134	0.999991
844	NC_005108.4	-	37902639	37902574	37902660	Dst	rna39707	gene22056	protein_coding	c	216.47	353.832	417.416	355.541	163.921	443.741	368.025	348.704	333.456	-0.021663	0.379655	-0.0570596	0.954498	0.999991
845	NC_005100.4	-	90063431	90063382	90063448	Gpi	rna2885	gene1720	protein_coding	o	329.67	384.717	443.733	298.079	363.854	394.584	258.799	296.475	346.239	-0.150762	0.295567	-0.510077	0.609998	0.999991
846	NC_005105.4	-	28390544	28390536	28390572	Efr3b	rna27991	gene15640	protein_coding	c	311.796	304.148	328.231	371.103	269.475	391.263	411.322	413.221	350.07	0.176822	0.281332	0.628518	0.529665	0.999991
847	NC_005109.4	+	38906485	38906443	38906659	Sept8	rna43143	gene23729	protein_coding	o	363.431	378.674	259.514	284.911	396.141	356.72	364.089	433.191	354.584	0.270278	0.277303	0.974667	0.329725	0.999991
848	NC_005104.4	-	59150345	59150333	59150351	Hint2	rna24021	gene13617	protein_coding	o	484.575	336.375	309.224	338.781	379.998	358.048	288.319	413.99	363.664	-0.0238186	0.292725	-0.0813686	0.935149	0.999991
849	NC_005109.4	-	40743311	40743253	40743334	Sparc	rna43236	gene23767	protein_coding	c	192.639	388.074	320.189	389.06	216.077	491.569	318.824	347.167	332.95	0.0890271	0.36738	0.242329	0.808525	0.999991
850	NC_005106.4	-	71265056	71265030	71265092	Uqcrb	rna32476	gene18348	protein_coding	c	131.074	414.93	244.894	367.512	253.332	567.962	425.099	227.349	329.019	0.344388	0.440776	0.781324	0.434612	0.999991
851	NC_005109.4	+	34356173	34356165	34356379	Rpl31l2	gene23601	gene23601	pseudogene	o	689.13	183.294	415.223	295.685	576.206	168.064	308	496.173	391.472	-0.0297422	0.482289	-0.0616688	0.950827	0.999991
852	NC_005100.4	+	193391623	193391609	193391958	Lcmt1	rna5801	gene3331	protein_coding	o	274.063	347.118	277.79	311.248	271.959	457.691	292.255	463.914	337.005	0.29663	0.31203	0.950645	0.341785	0.999991
853	NC_005108.4	+	46090447	46090424	46090645	Rpl31	rna39931	gene22142	protein_coding	o	566	210.822	304.107	381.877	684.244	173.378	380.818	435.496	392.093	0.196671	0.451903	0.435207	0.663412	0.999991
854	NC_005109.4	-	84562915	84562895	84562948	Skap1	rna45287	gene24840	protein_coding	i	395.207	400.159	320.92	341.175	387.449	318.191	285.367	382.499	353.871	-0.0851077	0.270876	-0.314194	0.753373	0.999991
855	NC_005108.4	+	93155067	93155056	93155298	Psmd1	rna41080	gene22663	protein_coding	p	200.582	331.004	274.135	335.19	223.528	540.062	333.584	394.02	329.013	0.385316	0.357356	1.07824	0.280926	0.999991
856	NC_005106.4	-	70846343	70846292	70846355	Lrp1	rna32450	gene18334	protein_coding	o	381.305	308.176	299.721	420.184	413.527	351.406	358.185	347.936	360.055	0.0638771	0.270778	0.235902	0.813509	0.999991
857	NC_005108.4	+	15314876	15314858	15315091	Tomm6	rna39209	gene21805	protein_coding	o	158.877	406.873	457.622	368.709	227.254	361.37	383.77	267.288	328.97	-0.171307	0.384	-0.446114	0.655515	0.999991
858	NC_005102.4	+	61484574	61484532	61484987	Lnp	rna15398	gene8635	protein_coding	x	516.351	339.061	242.701	113.725	813.394	235.156	194.837	524.592	372.477	0.546454	0.533352	1.02457	0.305567	0.999991
859	NC_005100.4	+	79988001	79987937	79988392	Dmpk	rna1992	gene1299	protein_coding	o	303.852	315.562	322.382	350.752	254.574	493.562	291.271	367.905	337.483	0.12467	0.310302	0.40177	0.687854	0.999991
860	NC_005107.4	-	23030006	23029975	23030018	Elavl3	rna35289	gene19821	protein_coding	c	492.519	304.819	323.844	386.665	607.251	226.52	360.153	315.677	377.181	0.00228878	0.371791	0.00615609	0.995088	0.999991
861	NC_005104.4	+	156878654	156878333	156879224	Camk2n1	rna26512	gene14912	protein_coding	o	218.456	286.691	290.948	427.367	221.044	468.984	276.511	473.131	332.892	0.235315	0.371592	0.633263	0.526562	0.999991
862	NC_005105.4	+	33863144	33863134	33863264	Pum2	rna28122	gene15701	protein_coding	c	470.673	290.048	449.581	326.81	474.376	277.67	362.121	267.288	364.821	-0.154099	0.330326	-0.466507	0.640853	0.999991
863	NC_005113.4	-	25610365	25610364	25610367	Epha5	rna53860	gene29425	protein_coding	i	401.165	270.577	375.747	385.468	777.381	192.642	361.137	261.912	378.254	0.151518	0.437754	0.346125	0.729249	0.999991
864	NC_005114.4	+	33012587	33012566	33012781	Oxa1l	rna56378	gene30894	protein_coding	o	303.852	333.69	288.024	339.978	278.168	468.984	311.936	373.282	337.239	0.18047	0.290733	0.620743	0.534769	0.999991
865	NC_005109.4	+	99388162	99388155	99388341	Kcnj16	rna46208	gene25282	protein_coding	c	121.144	388.074	404.988	466.871	381.239	511.498	261.751	97.5448	329.139	-0.144154	0.519141	-0.277678	0.78126	0.999991
866	NC_005100.4	+	192575341	192575318	192575676	Prkcb	rna5771	gene3323	protein_coding	o	220.442	302.133	288.755	342.372	193.724	458.355	355.233	462.378	327.924	0.349204	0.355473	0.982366	0.32592	0.999991
867	NC_005115.4	-	20485028	20485009	20485037	Jund	rna58629	gene32084	protein_coding	o	421.024	300.119	345.775	362.723	429.671	387.941	295.207	293.403	354.483	-0.0215947	0.288035	-0.0749726	0.940236	0.999991
868	NC_005111.4	-	24091390	24091385	24091405	Rhbdd2	rna49760	gene27271	protein_coding	c	591.817	299.448	334.079	298.079	514.115	269.034	264.703	389.411	370.086	-0.0810009	0.371234	-0.218194	0.827278	0.999991
869	NC_005106.4	-	117129268	117129237	117129288	Puf60	rna33213	gene18761	protein_coding	c	387.263	304.148	362.589	320.824	398.625	457.026	242.07	288.794	345.167	0.0140022	0.313209	0.0447055	0.964342	0.999991
870	NC_005109.4	-	81657152	81657134	81657165	Nme1	rna45074	gene24748	protein_coding	o	125.116	422.315	272.673	253.787	170.13	573.276	244.038	397.86	307.399	0.364571	0.464354	0.785114	0.432387	0.999991
871	NC_005100.4	+	78420424	78420404	78420710	Tmem160	rna1926	gene1244	protein_coding	o	407.123	364.574	383.788	345.964	398.625	298.927	238.134	358.689	349.478	-0.214102	0.286224	-0.748022	0.454447	0.999991
872	NC_005106.4	-	130786879	130786863	130786893	Syt10	rna34055	gene19109	protein_coding	i	305.838	363.903	429.112	290.897	294.312	308.891	162.364	496.941	331.532	-0.139132	0.377547	-0.368516	0.712489	0.999991
873	NC_005105.4	+	76205431	76205409	76205703	Psma6	rna28733	gene16048	protein_coding	o	184.695	281.991	335.541	405.819	178.822	620.44	253.878	300.315	320.188	0.164028	0.433245	0.378603	0.704983	0.999991
874	NC_005102.4	-	5995213	5995204	5995233	Brd3	rna14136	gene7919	protein_coding	c	452.8	235.664	277.059	348.358	732.675	327.491	374.914	248.855	374.727	0.359699	0.403877	0.890616	0.373135	0.999991
875	NC_005107.4	+	117305712	117305693	117305991	Qars	rna38000	gene21231	protein_coding	o	552.098	275.277	285.831	276.532	413.527	369.341	247.974	447.017	358.45	0.0942581	0.35919	0.262418	0.792999	0.999991
876	NC_005104.4	+	152686813	152686794	152687002	Stmn1	rna26300	gene14823	protein_coding	o	345.558	351.146	374.285	339.978	305.488	369.341	387.706	263.448	342.119	-0.0900381	0.271099	-0.332123	0.739796	0.999991
877	NC_005109.4	-	105430520	105430510	105430543	Prpsap1	rna46489	gene25422	protein_coding	c	349.53	318.247	336.272	310.051	309.214	406.541	257.815	413.221	337.611	0.0800751	0.28665	0.279348	0.779978	0.999991
878	NC_005106.4	-	11458985	11458957	11459019	Map2k2	rna30994	gene17507	protein_coding	o	462.73	341.075	275.597	223.859	505.422	495.555	224.358	261.144	348.717	0.19225	0.391302	0.491309	0.623208	0.999991
879	NC_005104.4	-	138649505	138649493	138649514	Foxj3	rna25648	gene14518	protein_coding	i	317.754	376.66	360.396	312.445	396.141	275.013	340.473	360.993	342.484	0.00226726	0.270146	0.00839272	0.993304	0.999991
880	NC_005119.4	+	5138090	5138068	5138316	Bag6	rna66259	gene36490	protein_coding	o	246.26	292.062	490.518	537.501	171.372	336.127	384.754	237.334	336.991	-0.47221	0.390272	-1.20995	0.226298	0.999991
881	NC_005100.4	-	222526948	222526937	222526966	Mark2	rna7438	gene4085	protein_coding	c	444.856	259.163	361.858	345.964	448.298	304.906	241.086	433.191	354.915	0.0184355	0.33278	0.0553986	0.955821	0.999991
882	NC_005102.4	-	2797045	2797032	2797063	Phpt1	rna13914	gene7806	protein_coding	c	190.653	366.589	346.506	328.007	228.495	484.926	351.297	276.505	321.622	0.120203	0.358794	0.33502	0.73761	0.999991
883	NC_005100.4	-	259373919	259373913	259373941	Sorbs1	rna8363	gene4641	protein_coding	o	381.305	284.677	330.424	368.709	320.39	346.756	317.84	413.221	345.415	0.0383133	0.270185	0.141804	0.887235	0.999991
884	NC_005105.4	+	137311516	137311465	137311818	Cep170b	rna30389	gene16910	protein_coding	o	397.193	312.876	348.699	338.781	466.925	328.156	331.616	290.33	351.822	0.0202103	0.285678	0.070745	0.943601	0.999991
885	NC_005103.4	+	84793640	84793635	84793655	Plekha8	rna20586	gene11690	protein_coding	i	665.298	362.56	372.823	231.042	452.023	186.663	219.438	433.191	365.38	-0.335643	0.430801	-0.779114	0.435913	0.999991
886	NC_005103.4	-	154210688	154210686	154210688	-	-	-	-	u	148.947	341.747	237.583	429.761	440.847	275.013	293.239	513.839	335.122	0.391694	0.397788	0.984681	0.324781	0.999991
887	NC_005109.4	+	99391553	99391537	99391902	Kcnj16	rna46207	gene25282	protein_coding	o	331.656	315.562	346.506	319.627	286.861	396.577	308.984	370.21	334.498	0.0549464	0.264476	0.207756	0.83542	0.999991
888	NC_005110.4	+	58717858	58717484	58718431	Gap43	rna47779	gene26179	protein_coding	o	182.709	414.259	228.08	377.088	249.606	397.241	426.083	331.038	325.763	0.22112	0.364806	0.60613	0.544428	0.999991
889	NC_005103.4	+	61940701	61940670	61941013	Bpgm	rna19955	gene11305	protein_coding	o	377.333	291.391	319.458	298.079	455.749	334.134	316.856	380.194	346.649	0.210838	0.276302	0.763072	0.44542	0.999991
890	NC_005105.4	-	91455334	91455326	91455358	Rps29	rna28885	gene16167	protein_coding	c	97.3122	288.705	347.968	568.626	337.776	399.234	488.076	151.31	334.876	0.0768888	0.506384	0.151839	0.879314	0.999991
891	NC_005111.4	-	44941680	44941662	44941717	Wsb2	rna50374	gene27578	protein_coding	c	357.474	337.718	241.238	257.378	496.729	338.784	318.824	410.149	344.787	0.391382	0.302758	1.29272	0.196107	0.999991
892	NC_005111.4	+	48554056	48554038	48554243	Coro1c	rna50559	gene27664	protein_coding	o	250.231	301.462	332.617	328.007	202.417	389.934	336.537	457.77	324.872	0.193995	0.332034	0.584264	0.559043	0.999991
893	NC_005113.4	+	71891147	71891126	71891447	Fbxl5	rna54452	gene29777	protein_coding	o	458.758	266.549	276.328	342.372	406.076	331.477	343.425	399.396	353.048	0.144858	0.299351	0.483908	0.628452	0.999991
894	NC_005107.4	+	23026507	23026490	23026867	Prkcsh	rna35286	gene19820	protein_coding	o	264.133	306.833	427.65	326.81	314.181	314.206	377.866	323.357	331.88	0.000884563	0.283554	0.00311955	0.997511	0.999991
895	NC_005112.4	-	89661761	89661746	89661777	Ufc1	rna52337	gene28592	protein_coding	o	291.937	456.557	220.039	269.349	384.965	437.098	225.342	329.502	326.849	0.152435	0.355221	0.429127	0.667831	0.999991
896	NC_005120.4	-	107531396	107531391	107531432	Rab9b	rna69132	gene38334	protein_coding	o	313.782	331.004	287.293	357.935	351.436	348.084	382.786	337.951	338.784	0.13884	0.252279	0.550343	0.582084	0.999991
897	NC_005110.4	-	88313711	88313699	88313723	Ppm1f	rna48757	gene26687	protein_coding	o	283.993	324.29	241.969	290.897	314.181	401.227	320.792	455.465	329.102	0.387785	0.282837	1.37105	0.170358	0.999991
898	NC_005108.4	+	43672229	43672205	43672404	Vwa3b	rna39856	gene22112	protein_coding	i	192.639	367.931	304.107	313.642	351.436	364.027	220.422	455.465	321.209	0.236096	0.34512	0.684098	0.493913	0.999991
899	NC_005107.4	+	49097687	49097676	49097926	Ift46	rna35994	gene20266	protein_coding	o	208.526	297.434	388.175	375.891	219.803	383.291	390.658	326.43	323.776	0.0537679	0.337021	0.159539	0.873244	0.999991
900	NC_005110.4	+	34722208	34722184	34722518	Ttc3	rna47318	gene25910	protein_coding	e	289.951	315.562	360.396	383.074	303.005	227.849	395.578	422.438	337.232	-0.00159991	0.3114	-0.00513779	0.995901	0.999991
901	NC_005108.4	+	10951255	10951238	10951499	Sema6b	rna39025	gene21717	protein_coding	o	444.856	317.576	347.968	283.714	306.73	417.17	189.917	372.514	335.056	-0.112233	0.340382	-0.329726	0.741607	0.999991
902	NC_005107.4	+	55039124	55039102	55039611	Timm8b	rna36212	gene20365	protein_coding	o	216.47	337.718	356.741	324.416	332.808	556.005	249.942	175.888	318.748	0.08792	0.398805	0.220458	0.825514	0.999991
903	NC_005106.4	-	121050301	121050220	121050341	Cbx6	rna33613	gene18908	protein_coding	c	266.119	347.118	291.679	325.613	275.685	405.877	299.144	384.035	324.409	0.149025	0.283668	0.52535	0.59934	0.999991
904	NC_005112.4	+	26553604	26553584	26553989	-	-	-	-	u	93.3403	357.189	130.123	794.879	613.46	176.699	616	115.979	362.209	0.144286	0.662446	0.217807	0.827579	0.999991
905	NC_005100.4	+	147022969	147022938	147023099	F8a1	rna4478	gene2500	protein_coding	o	371.375	294.748	341.389	366.315	403.592	296.934	306.032	360.225	342.576	-0.00647131	0.269832	-0.0239827	0.980866	0.999991
906	NC_005104.4	-	172660109	172660097	172660162	Prkcz	rna27178	gene15235	protein_coding	c	238.316	310.862	399.871	336.387	701.63	316.863	275.527	166.671	343.266	0.180461	0.43828	0.411747	0.680525	0.999991
907	NC_005104.4	-	58426901	58426888	58426951	Vcp	rna23980	gene13587	protein_coding	c	258.175	303.476	372.092	277.729	276.926	500.869	251.91	301.083	317.783	0.134937	0.331678	0.406832	0.684131	0.999991
908	NC_005102.4	+	129788424	129788260	129788814	Snap25	rna17249	gene9829	protein_coding	o	494.505	291.391	339.196	350.752	398.625	278.334	323.744	333.342	351.236	-0.142335	0.298628	-0.476631	0.633625	0.999991
909	NC_005109.4	+	58371203	58371163	58371468	Wscd1	rna44136	gene24230	protein_coding	c	307.824	317.576	450.312	372.3	260.783	377.977	266.671	259.608	326.631	-0.314183	0.296154	-1.06088	0.288746	0.999991
910	NC_005102.4	+	45414528	45414510	45414789	Pkp4	rna15040	gene8458	protein_coding	o	192.639	478.714	385.982	156.821	140.326	375.32	206.645	449.321	298.221	-0.0534371	0.475255	-0.112439	0.910475	0.999991
911	NC_005108.4	-	12113573	12113570	12113849	-	-	-	-	u	107.242	383.374	391.099	342.372	206.143	531.426	206.645	245.782	301.76	-0.0433242	0.469688	-0.0922402	0.926507	0.999991
912	NC_005117.4	-	24312543	24312525	24312571	LOC686074	gene34316	gene34316	pseudogene	o	321.726	370.617	286.562	278.926	353.919	329.484	195.821	477.739	326.849	0.109733	0.340354	0.32241	0.747142	0.999991
913	NC_005104.4	-	37145167	37145166	37145167	-	-	-	-	u	556.07	237.007	318.727	373.497	637.055	193.306	320.792	327.966	370.553	-0.00444484	0.424787	-0.0104637	0.991651	0.999991
914	NC_005106.4	-	70692018	70692011	70692028	LOC102553930	gene18328	gene18328	pseudogene	o	236.33	388.074	303.376	250.195	227.254	299.591	304.064	513.839	315.34	0.189089	0.353398	0.535062	0.592607	0.999991
915	NC_005100.4	+	101703557	101703526	101703856	Rpl18	rna3553	gene2011	protein_coding	o	246.26	380.688	246.356	266.955	387.449	386.613	227.31	423.206	320.604	0.318959	0.327037	0.975299	0.329412	0.999991
916	NC_005109.4	+	71721879	71721864	71722115	Acaca	rna44796	gene24616	protein_coding	p	343.572	333.69	241.238	287.306	317.907	379.97	309.968	417.062	328.839	0.244256	0.28155	0.86754	0.385646	0.999991
917	NC_005101.4	-	23858021	23858004	23858043	Scamp1	rna9344	gene5157	protein_coding	o	214.484	350.475	274.866	302.868	294.312	452.377	295.207	344.863	316.181	0.276798	0.306611	0.902764	0.366651	0.999991
918	NC_005113.4	+	61174877	61174867	61175172	Dhx15	rna54319	gene29700	protein_coding	o	204.554	364.574	258.783	410.607	295.554	362.698	480.204	235.029	326.501	0.146509	0.359728	0.407279	0.683803	0.999991
919	NC_005100.4	-	80549050	80549026	80549073	Clptm1	rna2083	gene1336	protein_coding	o	411.095	322.947	356.009	454.9	358.887	341.441	319.808	174.352	342.43	-0.370714	0.328426	-1.12876	0.259	0.999991
920	NC_005107.4	-	30040523	30040476	30040547	Ntm	rna35408	gene19877	protein_coding	c	258.175	308.848	377.209	226.253	321.632	386.613	239.118	400.932	314.848	0.20192	0.318076	0.634818	0.525547	0.999991
921	NC_005104.4	+	147329495	147329473	147329643	Fndc5	rna25969	gene14683	protein_coding	c	522.309	406.202	421.802	256.181	294.312	90.3424	184.997	519.983	337.016	-0.559479	0.48578	-1.15171	0.249439	0.999991
922	NC_005104.4	+	148060326	148060305	148060531	Ptp4a2	rna26026	gene14714	protein_coding	c	438.898	306.833	297.527	300.474	478.102	307.563	240.102	357.152	340.831	0.0437062	0.325933	0.134096	0.893327	0.999991
923	NC_005100.4	+	72784062	72784035	72784472	Ppp6r1	rna1731	gene1117	protein_coding	c	327.684	379.345	232.466	198.72	365.096	333.47	209.597	509.998	319.547	0.318019	0.371845	0.855246	0.392415	0.999991
924	NC_005103.4	+	56171673	56171653	56171991	Snd1	rna19770	gene11205	protein_coding	o	351.516	264.535	325.306	357.935	336.534	369.341	340.473	306.46	331.512	0.0610554	0.264244	0.231057	0.817271	0.999991
925	NC_005108.4	+	67284499	67284474	67284775	Abi2	rna40390	gene22369	protein_coding	o	248.246	316.904	282.907	317.233	314.181	335.463	319.808	421.67	319.552	0.253924	0.27133	0.935848	0.349352	0.999991
926	NC_005115.4	-	73479036	73479033	73479043	-	-	-	-	u	276.049	355.846	357.472	413.002	413.527	138.835	279.463	423.974	332.271	-0.161996	0.389467	-0.415943	0.677452	0.999991
927	NC_005117.4	-	4096104	4096097	4096154	Cabyr	rna62299	gene34174	protein_coding	x	180.723	349.132	349.43	429.761	227.254	372.663	457.572	172.048	317.323	-0.0929399	0.409157	-0.22715	0.820307	0.999991
928	NC_005110.4	-	64962682	64962657	64962703	Cox17	rna47925	gene26256	protein_coding	c	301.867	384.717	193.722	270.546	393.658	346.756	274.543	419.366	323.147	0.317828	0.323747	0.981717	0.326239	0.999991
929	NC_005113.4	+	107942294	107942272	107942421	LOC108352813	gene30199	gene30199	pseudogene	o	268.105	238.35	369.168	390.257	556.336	134.849	427.067	357.92	342.757	0.219392	0.427327	0.513405	0.607668	0.999991
930	NC_005115.4	+	8523554	8523539	8523714	Ogdhl	rna58180	gene31862	protein_coding	o	625.579	347.789	237.583	228.647	471.893	227.849	240.102	423.974	350.427	-0.0745918	0.424917	-0.175544	0.860652	0.999991
931	NC_005104.4	+	169534897	169534785	169535061	Chd5	rna27049	gene15190	protein_coding	e	943.333	203.437	280.714	165.201	963.654	112.928	231.246	294.939	399.431	0.0109415	0.65222	0.0167758	0.986616	0.999991
932	NC_005114.4	-	55254705	55254690	55254737	Itm2b	rna57208	gene31335	protein_coding	o	174.765	355.175	261.707	429.761	202.417	451.712	409.354	205.843	311.342	0.0540501	0.411117	0.131471	0.895402	0.999991
933	NC_005106.4	-	139724337	139724327	139724352	Asb8	rna34267	gene19225	protein_coding	o	428.968	253.792	268.286	319.627	387.449	313.541	332.6	391.716	336.998	0.171223	0.296568	0.577349	0.563704	0.999991
934	NC_005100.4	+	222877172	222877142	222877363	Pla2g16	rna7458	gene4093	protein_coding	o	317.754	356.518	212.728	369.906	358.887	392.591	268.639	318.749	324.471	0.0925703	0.308308	0.300253	0.763984	0.999991
935	NC_005109.4	+	92386513	92386497	92386814	Mapt	rna45973	gene25168	protein_coding	o	129.088	313.547	263.9	331.598	366.338	445.734	295.207	321.821	308.404	0.455957	0.359215	1.26931	0.204329	0.999991
936	NC_005102.4	+	92674700	92674673	92675242	-	-	-	-	u	250.231	334.361	346.506	416.593	173.855	414.512	354.249	218.132	313.555	-0.215365	0.365461	-0.589297	0.555662	0.999991
937	NC_005115.4	-	4185618	4185593	4185629	Erc2	rna57961	gene31768	protein_coding	i	423.01	329.661	341.389	398.636	351.436	239.806	252.894	344.863	335.212	-0.326801	0.287078	-1.13837	0.254966	0.999991
938	NC_005104.4	+	29562777	29562730	29562985	Calb1	rna23618	gene13359	protein_coding	o	113.2	380.017	231.735	347.161	139.084	419.827	417.227	347.936	299.523	0.301855	0.458996	0.657641	0.510769	0.999991
939	NC_005115.4	+	70854724	70854684	70855210	Fnta	rna59460	gene32574	protein_coding	o	276.049	328.318	307.031	322.022	263.266	368.013	361.137	307.228	316.633	0.0748539	0.269193	0.278067	0.780961	0.999991
940	NC_005104.4	-	172304818	172304728	172304844	Fam213b	rna27136	gene15222	protein_coding	o	347.544	330.333	388.906	301.671	348.952	348.084	257.815	251.927	321.904	-0.182273	0.280102	-0.650737	0.515216	0.999991
941	NC_005120.4	-	15462622	15462608	15462650	Pim2	rna67844	gene37383	protein_coding	o	426.982	295.419	255.859	257.378	351.436	377.313	304.064	357.152	328.2	0.175663	0.295865	0.593725	0.552696	0.999991
942	NC_005115.4	+	10695561	10695534	10695996	Glud1	rna58271	gene31898	protein_coding	o	228.386	289.377	252.935	418.987	366.338	393.92	418.211	216.596	323.094	0.22828	0.34471	0.662237	0.50782	0.999991
943	NC_005110.4	+	46206720	46206702	46206851	Tfg	rna47599	gene26087	protein_coding	o	401.165	261.849	356.741	367.512	373.789	248.442	401.482	280.345	336.415	-0.0882798	0.306799	-0.287745	0.773542	0.999991
944	NC_005103.4	+	58090838	58090714	58091003	Copg2	rna19889	gene11259	protein_coding	i	456.772	239.021	241.238	220.268	646.99	233.828	309.968	417.83	345.739	0.478292	0.407468	1.17381	0.24047	0.999991
945	NC_005103.4	-	7203016	7203002	7203041	Agap3	rna19133	gene10813	protein_coding	c	409.109	310.862	222.232	311.248	403.592	364.691	282.415	334.878	329.878	0.149017	0.305437	0.487883	0.625633	0.999991
946	NC_005112.4	+	51260230	51260211	51260504	Adipor1	rna51345	gene28093	protein_coding	o	315.768	288.034	332.617	337.584	373.789	283.649	325.712	341.791	324.868	0.0557522	0.259189	0.215102	0.829687	0.999991
947	NC_005106.4	-	117684339	117684303	117684377	Vps28	rna33311	gene18795	protein_coding	o	252.217	292.062	316.534	328.007	351.436	375.984	291.271	318.749	315.783	0.167811	0.26557	0.631889	0.527459	0.999991
948	NC_005108.4	-	66453428	66453421	66453450	Sumo1	rna40352	gene22357	protein_coding	c	144.975	386.731	244.894	357.935	181.306	439.091	353.265	291.866	300.008	0.155166	0.405935	0.382244	0.70228	0.999991
949	NC_005110.4	-	53514594	53514588	53514658	Cd47	rna47719	gene26132	protein_coding	c	490.533	210.151	279.983	186.749	588.624	392.591	304.064	272.665	340.67	0.420581	0.407405	1.03234	0.301912	0.999991
950	NC_005111.4	-	37471265	37471248	37471283	Tmed2	rna50041	gene27423	protein_coding	o	141.003	323.619	320.189	331.598	115.489	388.605	413.29	353.312	298.388	0.184671	0.44427	0.415672	0.67765	0.999991
951	NC_005120.4	-	38414226	38414212	38414255	Map7d2	rna68317	gene37649	protein_coding	c	569.972	384.045	217.846	250.195	874.243	114.921	180.077	301.851	361.644	0.0489645	0.569394	0.085994	0.931471	0.999991
952	NC_005109.4	+	57048139	57048127	57048441	Arrb2	rna44037	gene24187	protein_coding	p	450.814	281.32	339.196	391.454	470.651	229.842	276.511	283.418	340.401	-0.214232	0.336619	-0.636423	0.524501	0.999991
953	NC_005100.4	-	80613690	80613669	80613708	Apoe	rna2091	gene1341	protein_coding	c	758.638	75.1977	514.642	140.061	366.338	152.121	113.163	657.468	347.204	-0.205129	0.672432	-0.305055	0.760324	0.999991
954	NC_005114.4	+	52227709	52227690	52228055	Lgi3	rna57125	gene31300	protein_coding	o	190.653	346.446	290.948	343.57	201.175	445.734	241.086	329.502	298.639	0.0542862	0.362432	0.149783	0.880936	0.999991
955	NC_005104.4	-	151905621	151905581	151905638	Arid1a	rna26246	gene14796	protein_coding	c	365.417	348.461	218.577	263.363	259.541	414.512	229.278	396.324	311.934	0.124285	0.33968	0.365888	0.714449	0.999991
956	NC_005108.4	-	44011473	44011449	44011516	Coa5	rna39866	gene22116	protein_coding	o	272.077	380.688	222.963	300.474	279.41	343.434	342.441	347.936	311.178	0.158376	0.292651	0.541177	0.588386	0.999991
957	NC_005109.4	-	108682637	108682627	108682674	Nptx1	rna46661	gene25499	protein_coding	o	309.81	273.263	373.554	282.517	157.711	356.72	404.434	320.285	309.787	0.00144015	0.353109	0.0040785	0.996746	0.999991
958	NC_005107.4	+	22027233	22027205	22027398	Mrpl4	rna35169	gene19779	protein_coding	o	325.698	326.976	259.514	308.853	307.972	344.763	263.719	383.267	315.095	0.0925421	0.275103	0.336391	0.736576	0.999991
959	NC_005118.4	+	56613077	56613054	56613325	Rab4a	rna65607	gene35994	protein_coding	o	347.544	321.604	334.079	268.152	249.606	318.856	321.776	341.791	312.926	-0.0433143	0.270074	-0.160379	0.872582	0.999991
960	NC_005100.4	-	175631655	175631647	175631666	rnf141	rna5416	gene3139	protein_coding	o	264.133	312.205	307.031	318.43	283.136	303.577	369.009	337.951	311.934	0.104428	0.26155	0.399265	0.689698	0.999991
961	NC_005102.4	-	147102392	147102376	147102406	Snph	rna17590	gene10041	protein_coding	o	373.361	296.762	304.838	335.19	362.612	278.999	277.495	353.312	322.821	-0.0400297	0.270609	-0.147924	0.882402	0.999991
962	NC_005120.4	-	121578964	121578944	121578990	Klhl13	rna69338	gene38478	protein_coding	o	133.06	345.775	269.017	289.7	223.528	466.326	298.16	308.764	291.791	0.317833	0.381821	0.832413	0.405176	0.999991
963	NC_005109.4	+	63908674	63908661	63908970	Ywhae	rna44438	gene24413	protein_coding	e	728.849	184.637	899.893	90.9801	666.859	43.1784	85.6102	105.994	350.75	-1.07977	1.0464	-1.03189	0.302122	0.999991
964	NC_005119.4	+	27168973	27168940	27169241	Hnrnph3	rna66998	gene36881	protein_coding	c	238.316	286.691	450.312	306.459	165.162	209.249	232.23	516.911	300.666	-0.190737	0.41778	-0.45655	0.647995	0.999991
965	NC_005100.4	+	164573950	164573886	164574188	Arrb1	rna4788	gene2699	protein_coding	o	319.74	355.175	288.755	310.051	258.299	331.477	264.703	349.472	309.709	-0.0797438	0.270915	-0.29435	0.76849	0.999991
966	NC_005106.4	+	141377933	141377912	141378187	Gpd1	rna34435	gene19303	protein_coding	o	139.017	352.489	252.935	257.378	270.717	534.083	165.316	327.966	287.488	0.370743	0.42534	0.87164	0.383405	0.999991
967	NC_005107.4	+	64429272	64429226	64429686	Celf6	rna36599	gene20553	protein_coding	p	359.459	306.162	234.659	283.714	403.592	405.877	250.926	296.475	317.608	0.199714	0.308058	0.648301	0.516791	0.999991
968	NC_005100.4	+	212279251	212279233	212279558	Kndc1	rna6469	gene3656	protein_coding	o	184.695	360.546	284.369	318.43	180.064	336.791	340.473	370.978	297.043	0.0950645	0.353484	0.268936	0.787979	0.999991
969	NC_005102.4	-	51692852	51692851	51692860	Scn2a	rna15195	gene8513	protein_coding	i	953.263	271.249	201.763	408.213	339.018	165.406	351.297	295.707	373.239	-0.668316	0.485851	-1.37556	0.168959	0.999991
970	NC_005118.4	-	42754358	42754287	42754362	Zfhx3	rna65178	gene35778	protein_coding	c	818.217	244.392	294.603	274.137	532.742	181.349	279.463	284.186	363.636	-0.349614	0.476947	-0.733025	0.463543	0.999991
971	NC_005101.4	+	240655868	240655667	240656164	Ube2d3	rna13243	gene7477	protein_coding	o	319.74	332.347	285.1	323.219	367.579	320.849	347.361	240.406	317.075	0.0169799	0.276164	0.0614848	0.950973	0.999991
972	NC_005100.4	-	220804283	220804261	220804306	Drap1	rna7185	gene3989	protein_coding	c	383.291	222.236	226.618	283.714	525.291	346.091	284.383	351.008	327.829	0.437841	0.33432	1.30965	0.190316	0.999991
973	NC_005104.4	-	169570325	169570321	169570355	Kcnab2	rna27064	gene15191	protein_coding	c	323.712	280.648	345.044	312.445	418.494	421.155	238.134	178.192	314.728	-0.0070557	0.357111	-0.0197577	0.984237	0.999991
974	NC_005102.4	+	168099455	168099411	168099640	Cyp24a1	rna18549	gene10506	protein_coding	i	317.754	353.16	301.183	372.3	295.554	314.206	274.543	274.969	312.959	-0.21385	0.255482	-0.837044	0.402568	0.999991
975	NC_005120.4	+	107635886	107635807	107636272	Zcchc18	rna69137	gene38339	protein_coding	o	137.032	305.491	375.016	433.352	135.359	309.556	348.345	329.502	296.706	-0.157776	0.430321	-0.366648	0.713882	0.999991
976	NC_005100.4	-	116565784	116565778	116565812	LOC100912195	rna3807	gene2171	protein_coding	c	325.698	277.291	275.597	392.651	411.043	297.599	343.425	264.984	323.536	0.0513074	0.294537	0.174197	0.861711	0.999991
977	NC_005106.4	-	11325254	11325236	11325273	Matk	rna30973	gene17498	protein_coding	o	347.544	314.219	190.798	283.714	420.978	337.456	160.396	463.914	314.877	0.285649	0.389563	0.733255	0.463403	0.999991
978	NC_005101.4	-	96593186	96593157	96593208	Pkia	rna10284	gene5788	protein_coding	o	85.3965	332.347	256.59	301.671	208.626	512.826	228.294	338.719	283.059	0.397077	0.457035	0.86881	0.384951	0.999991
979	NC_005109.4	+	11153942	11153931	11154272	Pam16	rna42078	gene23164	protein_coding	o	305.838	288.034	339.927	355.541	147.777	385.948	318.824	293.403	304.411	-0.167569	0.347764	-0.481848	0.629914	0.999991
980	NC_005107.4	-	67690909	67690883	67690945	-	-	-	-	u	146.961	417.616	161.557	219.07	367.579	451.712	234.198	335.646	291.793	0.55077	0.407185	1.35263	0.176174	0.999991
981	NC_005109.4	-	102244678	102244675	102244692	Cdc42ep4	rna46268	gene25309	protein_coding	c	337.614	237.678	267.555	397.439	336.534	375.984	305.048	293.403	318.907	0.0837541	0.295472	0.283459	0.776825	0.999991
982	NC_005102.4	-	79959653	79959647	79959674	Madd	rna15977	gene9146	protein_coding	p	250.231	366.589	326.037	202.311	341.501	441.748	236.166	217.364	297.743	0.108295	0.356941	0.303398	0.761586	0.999991
983	NC_005114.4	-	32916757	32916747	32916768	RGD1566241	gene30890	gene30890	pseudogene	o	285.979	296.762	160.826	341.175	348.952	342.106	288.319	434.727	312.356	0.385246	0.331757	1.16123	0.245549	0.999991
984	NC_005106.4	+	80787516	80787498	80787727	Oxr1	rna32684	gene18452	protein_coding	c	401.165	303.476	390.368	332.796	166.404	123.557	532.358	318.749	321.109	-0.323047	0.446771	-0.723071	0.469636	0.999991
985	NC_005117.4	-	17689846	17689805	17689887	Celf4	rna62473	gene34284	protein_coding	c	234.344	191.351	215.653	246.604	183.79	502.198	382.786	418.598	296.915	0.748042	0.358076	2.08906	0.0367021	0.999991
986	NC_005113.4	+	7012587	7012504	7012948	Sparcl1	rna53399	gene29149	protein_coding	c	43.6912	69.8264	1399.91	128.09	58.3657	91.0067	174.172	178.192	267.907	-1.71072	1.10733	-1.54491	NA	NA
987	NC_005113.4	+	100360711	100360694	100361050	Ppp3r1	rna55281	gene30119	protein_coding	o	168.807	390.759	237.583	215.479	270.717	463.005	247.974	308.764	287.886	0.345717	0.369761	0.934975	0.349801	0.999991
988	NC_005108.4	+	10448785	10448742	10449154	LOC301124	rna38988	gene21695	protein_coding	c	276.049	347.789	400.602	219.07	274.443	318.191	246.006	307.996	298.768	-0.119783	0.306416	-0.390916	0.695859	0.999991
989	NC_005100.4	-	226912558	226912548	226912572	Tmem132a	rna7667	gene4192	protein_coding	o	573.944	303.476	248.549	269.349	444.572	234.492	251.91	357.92	335.527	-0.110555	0.383062	-0.288609	0.772881	0.999991
990	NC_005107.4	-	82498126	82498118	82498189	-	-	-	-	u	329.67	271.249	354.547	304.065	360.129	255.749	258.799	376.354	313.82	-0.00982164	0.289323	-0.0339469	0.972919	0.999991
991	NC_005100.4	+	163255456	163255437	163255719	Acer3	rna4727	gene2675	protein_coding	i	103.27	553.24	177.639	296.882	289.345	236.485	315.872	352.544	290.66	0.073379	0.467829	0.15685	0.875363	0.999991
992	NC_005104.4	-	40022918	40022913	40022942	-	-	-	-	u	375.347	269.235	236.121	357.935	382.481	303.577	363.105	298.779	323.323	0.125639	0.294076	0.427232	0.66921	0.999991
993	NC_005100.4	-	195074324	195074315	195074349	Snurf	rna5826	gene3349	protein_coding	o	109.228	392.102	225.887	223.859	153.986	461.676	184.013	454.697	275.681	0.39632	0.482727	0.821003	0.411645	0.999991
994	NC_005109.4	-	72300228	72300164	72300249	Usp32	rna44831	gene24631	protein_coding	o	274.063	320.261	292.41	266.955	346.468	273.684	350.313	341.023	308.147	0.182016	0.261789	0.695278	0.486881	0.999991
995	NC_005102.4	-	163328512	163328505	163328516	Prex1	rna18415	gene10426	protein_coding	p	210.512	281.32	261.707	378.286	167.646	360.041	425.099	322.589	300.9	0.172165	0.36646	0.469806	0.638493	0.999991
996	NC_005109.4	+	61454448	61454419	61454669	Cluh	rna44304	gene24344	protein_coding	o	276.049	343.089	350.161	240.618	194.966	272.356	236.166	453.161	295.821	-0.0651178	0.352159	-0.18491	0.8533	0.999991
997	NC_005118.4	+	56032611	56032585	56032879	Cdk10	rna65561	gene35973	protein_coding	o	393.221	260.506	248.549	268.152	471.893	407.87	261.751	241.174	319.139	0.24377	0.343878	0.708885	0.478396	0.999991
998	NC_005102.4	+	82421617	82421608	82421873	-	-	-	-	u	293.923	279.977	425.457	292.094	286.861	142.156	327.68	421.67	308.727	-0.133986	0.378946	-0.353575	0.723658	0.999991
999	NC_005106.4	+	138680571	138680559	138680978	-	-	-	-	u	504.435	414.93	369.899	226.253	331.567	407.205	181.061	64.5179	312.483	-0.621934	0.502627	-1.23737	0.215951	0.999991
1000	NC_005100.4	+	29386642	29386621	29386956	Ncoa7	rna485	gene326	protein_coding	o	256.189	276.62	277.059	331.598	310.456	312.877	336.537	347.167	306.063	0.194713	0.256991	0.757668	0.44865	0.999991
1001	NC_005107.4	+	119531389	119531364	119531517	Epm2aip1	rna38245	gene21318	protein_coding	o	230.372	312.205	269.017	301.671	198.692	389.934	341.457	319.517	295.358	0.166391	0.31502	0.528191	0.597366	0.999991
1002	NC_005111.4	+	39600418	39600381	39600748	Atp2a2	rna50169	gene27481	protein_coding	c	266.119	340.404	211.997	281.32	329.083	356.056	326.696	316.445	303.515	0.271736	0.278655	0.975169	0.329476	0.999991
1003	NC_005109.4	+	89483790	89483766	89484020	Nbr1	rna45730	gene25070	protein_coding	o	301.867	253.121	198.839	416.593	300.521	385.284	315.872	317.981	311.26	0.176947	0.322111	0.549336	0.582775	0.999991
1004	NC_005103.4	+	82832588	82832569	82832929	Tax1bp1	rna20541	gene11670	protein_coding	o	99.2982	360.546	300.452	282.517	207.384	380.634	333.584	301.083	283.187	0.2244	0.412069	0.544569	0.58605	0.999991
1005	NC_005119.4	+	13825481	13825464	13825691	Gstt3	rna66813	gene36746	protein_coding	o	347.544	272.592	303.376	272.94	515.356	262.392	240.102	325.662	317.495	0.166947	0.335552	0.497531	0.618815	0.999991
1006	NC_005102.4	-	123243874	123243864	123243886	RGD1565616	rna17081	gene9751	protein_coding	o	204.554	297.434	359.665	322.022	214.835	277.67	415.259	293.403	298.105	0.0177628	0.331968	0.0535076	0.957327	0.999991
1007	NC_005114.4	+	34258952	34258941	34259162	Psme1	rna56516	gene30955	protein_coding	o	278.035	295.419	251.473	205.902	284.377	437.098	188.933	403.237	293.059	0.351492	0.34851	1.00856	0.313187	0.999991
1008	NC_005102.4	+	47673332	47673300	47673669	Psmd14	rna15134	gene8486	protein_coding	o	270.091	285.348	247.087	293.291	295.554	298.927	381.802	366.369	304.809	0.29358	0.265031	1.10772	0.267983	0.999991
1009	NC_005108.4	-	77438442	77438413	77438457	LOC102550639	gene22450	gene22450	pseudogene	o	150.933	314.219	264.631	181.96	177.581	489.576	181.061	437.032	274.624	0.492965	0.436073	1.13047	0.25828	0.999991
1010	NC_005113.4	+	66749164	66749132	66749546	Kcnip4	rna54350	gene29732	protein_coding	o	174.765	367.931	326.037	337.584	135.359	449.055	217.47	245.014	281.652	-0.205116	0.418716	-0.489868	0.624227	0.999991
1011	NC_005107.4	+	82620641	82620631	82620821	Scg3	rna37157	gene20810	protein_coding	i	411.095	425.673	364.051	311.248	350.194	413.184	143.668	29.1866	306.037	-0.691861	0.582051	-1.18866	0.234573	0.999991
1012	NC_005110.4	-	5669286	5669266	5669286	-	-	-	-	u	39.7193	414.93	266.093	227.45	151.502	391.263	327.68	346.399	270.63	0.355179	0.54885	0.647132	0.517546	0.999991
1013	NC_005106.4	+	121336189	121336162	121336356	Syngr1	rna33630	gene18917	protein_coding	p	611.677	261.849	384.519	197.523	499.213	200.613	206.645	294.171	332.026	-0.276131	0.443316	-0.622875	0.533367	0.999991
1014	NC_005102.4	-	94990088	94990071	94990126	Eif3m	rna16247	gene9276	protein_coding	o	150.933	390.088	198.108	270.546	271.959	460.348	244.038	285.722	283.968	0.318267	0.385327	0.825968	0.408822	0.999991
1015	NC_005100.4	+	198701159	198701138	198701396	Zfp771	rna6072	gene3447	protein_coding	o	224.414	251.778	344.313	383.074	171.372	394.584	296.192	284.954	293.835	-0.0687708	0.35395	-0.194295	0.845945	0.999991
1016	NC_005106.4	+	139722139	139722100	139722318	Pfkm	rna34265	gene19224	protein_coding	o	172.779	405.53	299.721	281.32	276.926	301.584	229.278	331.038	287.272	-0.0311296	0.337187	-0.0923214	0.926443	0.999991
1017	NC_005100.4	-	57470631	57470621	57470655	Psmb1	rna1084	gene669	protein_coding	p	220.442	235.664	327.499	342.372	204.901	319.52	362.121	358.689	296.401	0.144749	0.324712	0.445778	0.655758	0.999991
1018	NC_005114.4	-	43645937	43645840	43645974	Bnip3l	rna56861	gene31162	protein_coding	c	424.996	316.233	236.852	308.853	324.116	348.748	266.671	271.129	312.2	-0.083127	0.300684	-0.27646	0.782195	0.999991
1019	NC_005102.4	+	159695723	159695700	159695941	Tox2	rna18199	gene10320	protein_coding	p	291.937	257.821	311.417	333.993	336.534	311.549	303.08	294.939	305.158	0.0603108	0.257335	0.234367	0.8147	0.999991
1020	NC_005100.4	-	140845478	140845472	140845504	Mfge8	rna4193	gene2375	protein_coding	c	121.144	310.862	342.12	243.013	171.372	573.94	181.061	219.668	270.397	0.169876	0.47657	0.356455	0.7215	0.999991
1021	NC_005102.4	+	81854490	81854458	81854678	-	-	-	-	u	260.161	304.148	360.396	294.488	279.41	266.377	341.457	284.186	298.828	-0.0613545	0.270387	-0.226913	0.820491	0.999991
1022	NC_005113.4	+	104741069	104741036	104741205	-	-	-	-	u	232.358	332.347	430.574	302.868	167.646	326.827	267.655	238.87	287.393	-0.376651	0.337033	-1.11755	0.26376	0.999991
1023	NC_005105.4	-	94951216	94951196	94951297	Rtn1	rna29017	gene16235	protein_coding	c	421.024	232.307	339.196	330.401	401.109	234.492	336.537	264.216	319.91	-0.0959464	0.324866	-0.295341	0.767733	0.999991
1024	NC_005100.4	-	143284040	143284016	143284056	Ap3b2	rna4351	gene2447	protein_coding	o	170.793	303.476	240.507	269.349	218.561	389.934	249.942	422.438	283.125	0.378027	0.347906	1.08658	0.277223	0.999991
1025	NC_005118.4	+	58862929	58862882	58863269	Kcnk1	rna65686	gene36043	protein_coding	o	264.133	331.004	255.859	264.56	247.123	346.091	248.958	374.818	291.568	0.12603	0.294388	0.428108	0.668573	0.999991
1026	NC_005108.4	-	45470332	45470287	45470356	Lonrf2	rna39917	gene22134	protein_coding	c	252.217	310.19	234.659	226.253	229.737	437.762	204.677	388.643	285.518	0.302491	0.34872	0.867433	0.385705	0.999991
1027	NC_005114.4	-	90177639	90177627	90177645	Spry2	rna57574	gene31556	protein_coding	c	863.894	175.909	263.169	223.859	918.949	169.392	224.358	145.933	373.183	-0.0642233	0.63547	-0.101064	NA	NA
1028	NC_005104.4	+	143103225	143103206	143103425	Meaf6	rna25809	gene14609	protein_coding	o	401.165	205.451	298.258	256.181	489.278	235.82	288.319	370.21	318.085	0.255816	0.355377	0.719842	0.471622	0.999991
1029	NC_005120.4	+	77279370	77279332	77279723	Pgk1	rna68845	gene38079	protein_coding	o	182.709	395.459	222.963	210.691	314.181	504.855	192.869	216.596	280.04	0.276956	0.411198	0.673535	0.500607	0.999991
1030	NC_005116.4	-	14078819	14078805	14078857	Spin1	rna60415	gene33073	protein_coding	o	377.333	255.135	225.156	305.262	274.443	337.456	285.367	384.803	305.619	0.147688	0.301371	0.490053	0.624096	0.999991
1031	NC_005102.4	+	101021877	101021796	101022210	-	-	-	-	u	240.302	210.151	238.314	348.358	316.665	314.206	364.089	386.339	302.303	0.41508	0.29256	1.41879	0.155961	0.999991
1032	NC_005119.4	+	10957808	10957797	10958041	-	-	-	-	u	202.568	290.048	223.694	262.166	239.672	490.905	208.613	343.327	282.624	0.390412	0.356104	1.09634	0.272929	0.999991
1033	NC_005100.4	+	80424428	80424401	80424789	Trappc6a	rna2063	gene1328	protein_coding	o	391.235	285.348	245.625	287.306	463.2	292.949	233.214	307.228	313.263	0.102612	0.328549	0.312318	0.754799	0.999991
1034	NC_005103.4	+	117252270	117252149	117252455	Cct7	rna21144	gene12069	protein_coding	o	343.572	273.934	249.28	283.714	341.501	311.549	300.128	337.951	305.204	0.17053	0.262856	0.648758	0.516495	0.999991
1035	NC_005100.4	-	211440333	211440320	211440353	Stk32c	rna6451	gene3645	protein_coding	o	154.905	234.321	404.257	387.862	156.47	392.591	306.032	238.87	284.414	-0.112277	0.414465	-0.270896	0.786471	0.999991
1036	NC_005100.4	-	188690881	188690872	188690887	Gprc5b	rna5613	gene3245	protein_coding	i	204.554	260.506	360.396	319.627	334.05	306.234	354.249	231.189	296.351	0.0933283	0.312377	0.298768	0.765117	0.999991
1037	NC_005105.4	+	133680872	133680847	133681187	RGD1566401	rna30021	gene16774	lncRNA	i	470.673	155.767	359.665	325.613	565.029	290.956	297.176	163.599	328.56	0.00690827	0.449562	0.0153667	0.98774	0.999991
1038	NC_005116.4	+	12405210	12405184	12405386	Auh	rna60385	gene33053	protein_coding	o	454.786	228.95	281.445	359.132	455.749	358.048	280.447	149.774	321.041	-0.0879027	0.400248	-0.219621	0.826167	0.999991
1039	NC_005105.4	+	108831339	108831330	108831852	LOC100360798	gene16479	gene16479	pseudogene	c	566	252.449	342.851	214.282	438.363	235.156	259.783	276.505	323.174	-0.182329	0.391305	-0.465952	0.64125	0.999991
1040	NC_005107.4	-	111694592	111694552	111694598	Tf	rna37715	gene21090	protein_coding	o	83.4105	308.176	431.305	293.291	84.4439	286.97	420.179	289.562	274.667	-0.0490311	0.530374	-0.0924461	0.926344	0.999991
1041	NC_005118.4	-	37665295	37665274	37665308	Acd	rna64961	gene35681	protein_coding	o	490.533	230.293	231.004	287.306	577.447	280.992	244.038	272.665	326.785	0.15364	0.404331	0.379984	0.703957	0.999991
1042	NC_005119.4	-	48456191	48456186	48456203	Wasf1	rna67484	gene37149	protein_coding	c	415.066	259.835	292.41	336.387	504.18	204.599	292.255	267.288	321.503	-0.039166	0.360726	-0.108575	0.913539	0.999991
1043	NC_005102.4	-	151356864	151356861	151356886	Eif6	rna17855	gene10175	protein_coding	c	345.558	222.907	308.493	243.013	336.534	373.991	223.374	340.255	299.266	0.190078	0.310928	0.611325	0.540985	0.999991
1044	NC_005104.4	-	13095936	13095930	13095936	Rb1cc1	rna23338	gene13214	protein_coding	i	450.814	310.19	219.308	295.685	442.089	217.885	287.335	324.893	318.525	-0.00161596	0.352688	-0.00458183	0.996344	0.999991
1045	NC_005108.4	-	66626489	66626475	66626516	Bmpr2	rna40355	gene22360	protein_coding	i	367.403	317.576	203.225	229.844	122.94	419.162	234.198	413.99	288.542	0.0950832	0.426277	0.223055	0.823492	0.999991
1046	NC_005111.4	+	12403389	12403365	12403680	Tecpr1	rna49200	gene26960	protein_coding	o	373.361	220.222	222.232	349.555	404.834	313.541	265.687	347.936	312.171	0.197787	0.322007	0.614231	0.539063	0.999991
1047	NC_005102.4	-	2569133	2569107	2569145	Dpp7	rna13868	gene7787	protein_coding	o	325.698	273.263	269.017	316.036	422.22	261.063	307.016	295.707	308.752	0.11942	0.287112	0.415934	0.677458	0.999991
1048	NC_005101.4	+	263877829	263877813	263878100	Zranb2	rna13652	gene7696	protein_coding	o	212.498	265.206	279.983	270.546	299.279	260.399	377.866	387.107	294.11	0.361995	0.286264	1.26455	0.206033	0.999991
1049	NC_005100.4	+	102909712	102909687	102909826	Ldha	rna3633	gene2046	protein_coding	o	156.891	476.699	168.867	259.772	242.155	470.976	218.454	203.538	274.669	0.0930178	0.447411	0.207902	0.835305	0.999991
1050	NC_005102.4	-	11408077	11408069	11408082	RGD1561113	rna14470	gene8041	protein_coding	c	264.133	224.25	331.155	308.853	283.136	300.256	307.016	349.472	296.034	0.136204	0.276754	0.492149	0.622614	0.999991
1051	NC_005100.4	-	164435874	164435810	164435881	Rps3	rna4778	gene2696	protein_coding	o	228.386	330.333	353.816	245.407	242.155	264.385	345.393	293.403	287.91	-0.0204127	0.298629	-0.0683545	0.945503	0.999991
1052	NC_005101.4	-	179769748	179769732	179769758	Glrb	rna11350	gene6445	protein_coding	c	158.877	285.348	368.437	329.204	186.273	367.348	324.728	233.493	281.714	-0.0414761	0.370852	-0.11184	0.91095	0.999991
1053	NC_005102.4	+	172423434	172423415	172423674	Gnas	rna18675	gene10562	protein_coding	i	532.238	219.55	253.666	308.853	717.773	162.749	259.783	254.231	338.606	0.0869018	0.485427	0.179021	0.857921	0.999991
1054	NC_005100.4	-	198635447	198635440	198635455	Cd2bp2	rna6065	gene3442	protein_coding	c	228.386	349.803	226.618	265.758	252.09	350.741	233.214	370.21	284.602	0.171128	0.315684	0.542087	0.587758	0.999991
1055	NC_005103.4	+	168625236	168625215	168625592	Crebl2	rna22695	gene12878	protein_coding	o	214.484	278.634	309.224	389.06	194.966	307.563	422.147	226.581	292.832	-0.0508253	0.355337	-0.143034	0.886263	0.999991
1056	NC_005103.4	+	146225410	146225309	146225782	-	-	-	-	u	258.175	253.121	364.051	306.459	196.208	306.234	377.866	266.52	291.079	-0.0438357	0.318268	-0.137732	0.890452	0.999991
1057	NC_005118.4	-	10575059	10575052	10575071	Polr2c	rna64055	gene35196	protein_coding	o	238.316	273.934	241.238	366.315	194.966	338.784	328.664	339.487	290.213	0.103523	0.32111	0.32239	0.747157	0.999991
1058	NC_005109.4	+	89180167	89180152	89180440	Vps25	rna45698	gene25052	protein_coding	o	373.361	304.148	313.61	265.758	320.39	248.442	245.022	331.038	300.221	-0.132847	0.281401	-0.472093	0.636861	0.999991
1059	NC_005102.4	+	35257420	35257355	35257571	Kif5c	rna14896	gene8385	protein_coding	o	69.5087	331.004	271.942	320.824	183.79	400.562	298.16	292.635	271.053	0.23838	0.46243	0.515494	0.606208	0.999991
1060	NC_005108.4	-	45528930	45528920	45528955	Chst10	rna39919	gene22135	protein_coding	o	317.754	243.05	225.887	253.787	408.56	292.284	245.022	415.526	300.234	0.39125	0.309732	1.26319	0.206522	0.999991
1061	NC_005107.4	-	45002503	45002494	45002517	-	-	-	-	u	160.863	382.031	434.96	268.152	301.763	435.105	176.14	42.2438	275.157	-0.385831	0.565968	-0.681718	0.495417	0.999991
1062	NC_005119.4	-	7331333	7331320	7331365	LOC294154	rna66472	gene36588	protein_coding	c	184.695	228.95	217.115	301.671	188.757	427.798	310.952	376.354	279.536	0.484497	0.34787	1.39275	0.163695	0.999991
1063	NC_005118.4	+	14426480	14426462	14426536	Tom1	rna64143	gene35255	protein_coding	o	349.53	172.552	291.679	298.079	551.369	266.377	297.176	271.129	312.236	0.319552	0.371938	0.859155	0.390255	0.999991
1064	NC_005104.4	-	168126157	168126152	168126174	Vamp3	rna27000	gene15165	protein_coding	c	135.046	284.005	168.867	220.268	266.992	498.212	186.965	399.396	269.969	0.739069	0.398338	1.85538	0.0635419	0.999991
1065	NC_005100.4	-	175883361	175883355	175883378	Eif4g2	rna5428	gene3145	protein_coding	c	97.3122	407.544	186.412	174.778	194.966	411.855	195.821	419.366	261.007	0.491945	0.472029	1.04219	0.297323	0.999991
1066	NC_005117.4	-	27128460	27128450	27128500	Reep5	rna62624	gene34353	protein_coding	o	148.947	312.205	345.044	221.465	235.946	320.849	274.543	330.27	273.659	0.170728	0.34509	0.494736	0.620786	0.999991
1067	NC_005111.4	+	40956003	40955987	40956204	Ptpn11	rna50265	gene27519	protein_coding	o	105.256	399.488	350.892	235.83	120.457	380.634	278.479	230.421	262.682	-0.115401	0.46693	-0.247149	0.804793	0.999991
1068	NC_005112.4	+	65444956	65444942	65445343	-	-	-	-	u	848.007	267.22	290.217	399.834	370.063	176.699	302.096	115.979	346.264	-0.902221	0.477819	-1.88821	0.0589982	0.999991
1069	NC_005102.4	+	94028874	94028609	94029376	Cd59	rna16220	gene9265	protein_coding	o	337.614	286.02	264.631	299.277	293.07	271.692	215.501	383.267	293.884	-0.0262918	0.29708	-0.0885007	0.929479	0.999991
1070	NC_005109.4	+	82045946	82045924	82046185	Ankrd40	rna45107	gene24757	protein_coding	o	297.895	266.549	204.687	333.993	382.481	302.249	300.128	304.156	299.017	0.226795	0.2899	0.782323	0.434025	0.999991
1071	NC_005100.4	+	218075479	218075464	218075655	Bc1	rna6935	gene3860	lncRNA	o	299.881	257.821	255.128	411.805	388.69	195.299	323.744	311.068	305.429	-0.00728621	0.333914	-0.0218206	0.982591	0.999991
1072	NC_005107.4	-	53849543	53849532	53849556	Ncam1	rna36196	gene20351	protein_coding	c	317.754	251.106	304.107	366.315	319.148	275.677	299.144	258.071	298.915	-0.104322	0.272316	-0.383093	0.701651	0.999991
1073	NC_005109.4	-	14259394	14259342	14259404	Mapk8ip3	rna42407	gene23325	protein_coding	o	89.3684	275.277	214.191	432.155	260.783	457.026	283.399	209.683	277.735	0.25775	0.459473	0.560969	0.574819	0.999991
1074	NC_005112.4	-	89590076	89590069	89590110	Tomm40l	rna52319	gene28584	protein_coding	c	317.754	328.318	245.625	220.268	340.259	299.591	243.054	327.198	290.258	0.12282	0.291746	0.420983	0.673767	0.999991
1075	NC_005105.4	-	76386975	76386957	76386990	Ralgapa1	rna28739	gene16054	protein_coding	o	287.965	279.306	237.583	288.503	296.796	217.885	382.786	368.673	294.937	0.212398	0.300898	0.705882	0.480262	0.999991
1076	NC_005103.4	-	84678976	84678963	84678997	Scrn1	rna20577	gene11687	protein_coding	o	115.186	318.247	306.3	254.984	170.13	455.698	290.287	211.987	265.352	0.177827	0.427236	0.416227	0.677244	0.999991
1077	NC_005115.4	+	889378	889357	889489	Spin1	rna57865	gene31729	protein_coding	x	333.642	247.749	289.486	398.636	453.265	131.528	309.968	314.14	309.802	-0.0714796	0.396487	-0.180282	0.856931	0.999991
1078	NC_005120.4	+	21017571	21017548	21017882	FAM120C	rna68002	gene37475	protein_coding	p	355.488	218.208	212.728	310.051	332.808	281.656	367.041	333.342	301.415	0.268025	0.302585	0.885786	0.375733	0.999991
1079	NC_005106.4	-	122539300	122539288	122539309	Slc25a17	rna33685	gene18943	protein_coding	c	266.119	306.162	231.735	270.546	274.443	324.17	330.632	288.026	286.479	0.180178	0.26387	0.682831	0.494714	0.999991
1080	NC_005102.4	+	8829506	8829490	8829754	Lrrc8a	rna14328	gene7977	protein_coding	o	291.937	295.419	231.004	263.363	305.488	362.034	215.501	321.821	285.821	0.157913	0.292938	0.539068	0.58984	0.999991
1081	NC_005108.4	+	66683021	66682907	66683418	Bmpr2	rna40356	gene22360	protein_coding	o	127.102	328.318	239.776	263.363	119.215	352.734	399.514	321.053	268.885	0.31199	0.433644	0.71946	0.471857	0.999991
1082	NC_005103.4	-	90782418	90782413	90782432	Snca	rna20725	gene11782	protein_coding	c	317.754	263.863	252.935	301.671	259.541	275.677	332.6	336.415	292.557	0.0877014	0.269313	0.325649	0.74469	0.999991
1083	NC_005106.4	+	139279504	139279480	139279886	Slc48a1	rna34235	gene19212	protein_coding	o	341.586	285.348	240.507	305.262	296.796	318.191	235.182	315.677	292.319	-0.00403957	0.278288	-0.0145158	0.988418	0.999991
1084	NC_005101.4	-	30115777	30115771	30115777	LOC680951	gene5239	gene5239	pseudogene	p	168.807	252.449	410.836	497.996	193.724	168.064	404.434	218.132	289.305	-0.437094	0.430031	-1.01643	0.309427	0.999991
1085	NC_005105.4	-	43463287	43463275	43463321	Ywhaq	rna28251	gene15789	protein_coding	o	71.4947	373.303	257.321	341.175	142.81	347.42	349.329	244.246	265.887	0.0513214	0.485934	0.105614	0.915889	0.999991
1086	NC_005111.4	-	31320622	31320612	31320642	Ran	rna49950	gene27368	protein_coding	c	81.4245	333.018	232.466	313.642	111.764	448.391	353.265	229.653	262.953	0.248204	0.502257	0.494177	0.621181	0.999991
1087	NC_005104.4	-	138628488	138628467	138628502	Rps27a-ps1	gene14519	gene14519	pseudogene	o	111.214	357.189	149.86	137.667	156.47	588.554	187.949	327.198	252.013	0.733896	0.504044	1.45602	0.145388	0.999991
1088	NC_005100.4	+	201480878	201480863	201481163	Plekha1	rna6259	gene3531	protein_coding	c	144.975	329.661	320.92	244.21	198.692	299.591	329.648	294.171	270.234	0.104322	0.35346	0.295147	0.767882	0.999991
1089	NC_005100.4	+	120875493	120875445	120875862	-	-	-	-	u	105.256	330.333	264.631	203.508	168.888	504.191	177.124	294.171	256.013	0.337076	0.460616	0.731795	0.464294	0.999991
1090	NC_005100.4	+	148458964	148458875	148459209	Mpp1	rna4511	gene2517	protein_coding	o	164.835	306.833	263.169	191.537	430.912	418.498	173.188	246.55	274.44	0.449081	0.39028	1.15066	0.249871	0.999991
1091	NC_005102.4	+	2731217	2731206	2731473	Fbxw5	rna13904	gene7802	protein_coding	o	468.688	243.721	246.356	281.32	464.442	246.449	247.974	280.345	309.912	0.00256965	0.363661	0.00706607	0.994362	0.999991
1092	NC_005106.4	-	12851165	12851149	12851169	Polrmt	rna31224	gene17598	protein_coding	x	264.133	255.806	372.823	233.436	269.475	276.342	160.396	395.556	278.496	-0.03214	0.355253	-0.0904706	0.927913	0.999991
1093	NC_005106.4	+	115408193	115408175	115408617	LOC108351509	rna33062	gene18701	lncRNA	x	442.87	153.752	293.872	508.77	259.541	557.997	149.572	36.0993	300.309	-0.477694	0.625223	-0.764038	0.444845	0.999991
1094	NC_005103.4	+	7287431	7287400	7287593	Cdk5	rna19158	gene10819	protein_coding	o	293.923	237.007	323.113	312.445	253.332	376.648	277.495	205.843	284.976	-0.0654216	0.308187	-0.212279	0.831889	0.999991
1095	NC_005101.4	+	189413616	189413594	189413765	LOC361985	rna11820	gene6647	protein_coding	o	186.681	300.791	270.479	278.926	214.835	332.806	318.824	291.098	274.305	0.155531	0.303831	0.5119	0.608721	0.999991
1096	NC_005110.4	-	34592135	34592125	34592140	Pigp	rna47315	gene25909	protein_coding	c	297.895	284.677	213.459	302.868	340.259	235.82	265.687	387.107	290.972	0.162882	0.303693	0.53634	0.591724	0.999991
1097	NC_005100.4	+	89501912	89501892	89502012	Lgi4	rna2853	gene1700	protein_coding	c	440.884	286.691	282.176	295.685	362.612	261.727	194.837	271.897	299.564	-0.255658	0.322424	-0.792925	0.427821	0.999991
1098	NC_005109.4	-	94388522	94388507	94388530	Ccdc47	rna46056	gene25205	protein_coding	c	289.951	293.405	263.169	347.161	234.704	249.77	331.616	292.635	287.801	-0.105475	0.276883	-0.380937	0.70325	0.999991
1099	NC_005106.4	-	14241166	14241060	14241196	Brd4	rna31300	gene17648	protein_coding	c	619.621	208.808	157.171	186.749	714.048	152.121	138.748	440.104	327.171	0.305192	0.582013	0.524373	0.600019	0.999991
1100	NC_005106.4	+	144068454	144068441	144068695	Prr13	rna34622	gene19396	protein_coding	p	472.659	220.893	247.087	269.349	408.56	277.67	279.463	268.824	305.563	0.034314	0.348348	0.0985048	0.921531	0.999991
1101	NC_005100.4	-	242127848	242127846	242127850	Fxn	rna7956	gene4428	protein_coding	i	407.123	378.674	444.464	281.32	355.161	102.3	380.818	52.2287	300.261	-0.766269	0.540938	-1.41655	0.156613	0.999991
1102	NC_005104.4	-	33174537	33174532	33174551	Maged2	rna23639	gene13381	protein_coding	c	188.667	351.818	185.681	204.705	312.939	330.813	191.885	397.86	270.546	0.402956	0.362202	1.11252	0.265916	0.999991
1103	NC_005101.4	+	140521581	140521517	140521845	Naa15	rna10852	gene6127	protein_coding	e	589.831	273.263	252.935	167.595	525.291	132.192	199.757	375.586	314.556	-0.0559023	0.500415	-0.111712	0.911052	0.999991
1104	NC_005102.4	+	14508925	14508894	14509094	Gsn	rna14650	gene8106	protein_coding	o	200.582	293.405	247.087	254.984	271.959	368.677	266.671	282.65	273.252	0.25362	0.284968	0.889995	0.373469	0.999991
1105	NC_005113.4	-	106378029	106378021	106378041	Mdh1	rna55354	gene30171	protein_coding	p	95.3263	431.715	207.611	323.219	227.254	298.263	332.6	219.668	266.957	0.0217911	0.437582	0.0497989	0.960283	0.999991
1106	NC_005100.4	+	78927617	78927603	78927963	-	-	-	-	u	262.147	263.192	215.653	234.633	271.959	355.391	305.048	322.589	278.826	0.366189	0.26461	1.38388	0.166395	0.999991
1107	NC_005116.4	+	35682337	35682243	35682686	Uqcrfs1	rna61002	gene33388	protein_coding	o	119.158	327.647	323.113	338.781	131.633	369.341	291.271	203.538	263.06	-0.157477	0.434004	-0.362846	0.71672	0.999991
1108	NC_005105.4	+	137967041	137967031	137967278	LOC690422	rna30441	gene16927	protein_coding	o	331.656	229.621	220.77	257.378	193.724	360.705	197.789	433.959	278.2	0.196665	0.366961	0.53593	0.592007	0.999991
1109	NC_005117.4	+	55824199	55824172	55824365	Dctn4	rna63187	gene34730	protein_coding	o	317.754	264.535	297.527	284.911	203.659	292.284	355.233	251.159	283.383	-0.0767517	0.292839	-0.262095	0.793248	0.999991
1110	NC_005100.4	+	220005074	220005062	220005169	Sptbn2	rna7093	gene3933	protein_coding	c	264.133	299.448	320.92	257.378	235.946	300.92	244.038	280.345	275.391	-0.106578	0.26675	-0.399543	0.689493	0.999991
1111	NC_005100.4	-	222164461	222164438	222164498	Prdx5	rna7375	gene4061	protein_coding	o	93.3403	374.646	231.735	203.508	191.241	360.041	168.268	406.309	253.636	0.313207	0.459616	0.681454	0.495584	0.999991
1112	NC_005105.4	+	42585657	42585630	42586148	Pdia6	rna28222	gene15771	protein_coding	o	123.13	288.034	227.349	217.873	157.711	472.969	330.632	251.927	258.703	0.498957	0.410854	1.21444	0.22458	0.999991
1113	NC_005101.4	-	84667576	84667539	84667667	Cct5	rna10138	gene5684	protein_coding	o	200.582	301.462	304.838	245.407	271.959	330.813	252.894	261.912	271.233	0.0820365	0.287824	0.285023	0.775626	0.999991
1114	NC_005103.4	+	70330956	70330938	70331171	Chl1	rna20155	gene11421	protein_coding	c	424.996	282.663	332.617	263.363	330.325	314.87	229.278	155.918	291.754	-0.337553	0.346339	-0.974633	0.329742	0.999991
1115	NC_005116.4	+	46640711	46640676	46640942	Elmo1	rna61389	gene33674	protein_coding	i	689.13	245.064	328.962	332.796	270.717	132.857	267.655	272.665	317.48	-0.754262	0.409231	-1.84312	0.0653115	0.999991
1116	NC_005106.4	+	11562026	11562006	11562238	Diras1	rna31003	gene17512	protein_coding	p	218.456	266.549	289.486	231.042	339.018	304.906	216.485	334.11	275.006	0.244925	0.291753	0.839495	0.401191	0.999991
1117	NC_005112.4	+	90508894	90508847	90509261	Copa	rna52421	gene28626	protein_coding	o	178.737	292.062	203.225	254.984	208.626	368.677	322.76	319.517	268.574	0.390594	0.320415	1.21903	0.222834	0.999991
1118	NC_005100.4	+	198198983	198198956	198199339	Mapk3	rna5959	gene3409	protein_coding	o	186.681	288.034	233.197	228.647	255.815	393.92	194.837	347.167	266.037	0.345703	0.333209	1.03749	0.299506	0.999991
1119	NC_005109.4	+	33995169	33995153	33995671	-	-	-	-	u	301.867	218.208	188.605	363.92	535.225	182.678	358.185	286.49	304.397	0.345879	0.397883	0.869298	0.384684	0.999991
1120	NC_005107.4	-	46146073	46146073	46146078	-	-	-	-	u	152.919	234.993	290.948	386.665	280.652	167.399	439.859	313.372	283.351	0.169414	0.401156	0.422313	0.672796	0.999991
1121	NC_005111.4	-	40712077	40712056	40712102	Hectd4	rna50262	gene27517	protein_coding	o	230.372	302.805	285.831	302.868	269.475	253.092	330.632	254.999	278.759	-0.0217324	0.272435	-0.079771	0.936419	0.999991
1122	NC_005105.4	+	137889144	137889117	137889365	Pacs2	rna30424	gene16922	protein_coding	o	369.389	240.364	345.044	306.459	373.789	213.235	230.262	267.288	293.229	-0.217521	0.315989	-0.688383	0.491212	0.999991
1123	NC_005114.4	+	42976796	42976749	42977095	Trim35	rna56836	gene31155	protein_coding	o	180.723	336.375	198.108	302.868	167.646	406.541	306.032	231.957	266.281	0.126606	0.379108	0.333957	0.738412	0.999991
1124	NC_005115.4	+	20295287	20295279	20295416	Rpl18a	rna58572	gene32070	protein_coding	o	152.919	202.765	579.703	359.132	122.94	307.563	307.016	99.8491	266.486	-0.630112	0.50848	-1.23921	0.215269	0.999991
1125	NC_005106.4	-	12912262	12912229	12912273	Tpgs1	rna31231	gene17604	protein_coding	o	329.67	230.293	281.445	263.363	345.227	267.706	170.236	390.179	284.765	0.0895212	0.341248	0.262335	0.793063	0.999991
1126	NC_005111.4	-	19162178	19162172	19162204	-	-	-	-	u	248.246	222.236	313.61	288.503	260.783	259.735	245.022	384.035	277.771	0.100255	0.299573	0.334661	0.737881	0.999991
1127	NC_005109.4	-	89319971	89319953	89319976	Aarsd1	rna45714	gene25062	protein_coding	c	419.038	316.233	371.361	155.624	319.148	234.492	96.4344	343.327	281.957	-0.344609	0.449792	-0.766153	0.443585	0.999991
1128	NC_005100.4	-	220810203	220810157	220810215	-	-	-	-	u	278.035	292.062	266.824	193.931	404.834	273.02	195.821	334.878	279.926	0.228001	0.330645	0.689564	0.490468	0.999991
1129	NC_005108.4	+	66784492	66784473	66784662	Fam117b	rna40359	gene22362	protein_coding	o	413.081	132.939	321.651	199.917	214.835	304.906	388.69	329.502	288.19	0.219395	0.402291	0.545364	0.585503	0.999991
1130	NC_005100.4	+	214607471	214607459	214607711	Ap2a2	rna6700	gene3781	protein_coding	o	303.852	241.707	365.513	227.45	319.148	287.634	195.821	288.794	278.74	-0.0611969	0.312743	-0.195678	0.844862	0.999991
1131	NC_005109.4	-	105123324	105123313	105123357	Srp68	rna46468	gene25408	protein_coding	o	156.891	279.977	219.308	278.926	193.724	350.077	268.639	370.978	264.815	0.337554	0.343911	0.981517	0.326338	0.999991
1132	NC_005104.4	-	78392673	78392669	78392679	LOC100910017	gene13887	gene13887	pseudogene	o	353.502	237.007	148.398	302.868	378.756	235.82	251.91	433.191	292.682	0.324035	0.374056	0.866274	0.38634	0.999991
1133	NC_005106.4	-	12258467	12258460	12258478	Apc2	rna31115	gene17555	protein_coding	o	222.428	284.677	293.872	268.152	183.79	340.777	207.629	332.574	266.737	-0.00568677	0.325498	-0.017471	0.986061	0.999991
1134	NC_005111.4	-	11272610	11272603	11272642	Arpc1a	rna49176	gene26938	protein_coding	c	327.684	247.749	283.638	284.911	420.978	227.849	286.351	253.463	291.578	0.0549707	0.310258	0.177177	0.859369	0.999991
1135	NC_005120.4	+	1789520	1789494	1789766	Ndufb11	rna67619	gene37237	protein_coding	o	121.144	407.544	185.681	185.551	166.404	452.377	163.348	310.3	249.044	0.276507	0.469664	0.588734	0.55604	0.999991
1136	NC_005101.4	+	205202769	205202754	205203122	Tspan2	rna12471	gene7034	protein_coding	o	162.849	147.038	262.438	293.291	310.456	403.22	295.207	306.46	272.62	0.602603	0.336593	1.7903	0.0734051	0.999991
1137	NC_005102.4	+	121739160	121739132	121739336	Slc20a1	rna17001	gene9703	protein_coding	o	95.3263	337.047	154.246	245.407	113.006	544.048	217.47	278.809	248.17	0.468968	0.510176	0.919226	0.357977	0.999991
1138	NC_005100.4	-	80606639	80606626	80606656	Apoc1	rna2087	gene1340	protein_coding	o	313.782	292.062	244.894	222.662	288.103	268.37	181.061	404.005	276.867	0.0911478	0.333862	0.273011	0.784845	0.999991
1139	NC_005119.4	+	41102064	41102027	41102565	Tspyl4	rna67335	gene37057	protein_coding	o	311.796	232.307	300.452	275.334	307.972	351.406	296.192	181.264	282.09	0.0232844	0.314351	0.0740713	0.940954	0.999991
1140	NC_005111.4	+	13111841	13111826	13112232	Rac1	rna49232	gene26978	protein_coding	o	71.4947	440.443	101.613	147.244	134.117	534.083	156.46	331.806	239.658	0.600367	0.588538	1.0201	0.307682	0.999991
1141	NC_005102.4	+	123567923	123567887	123568157	Atrn	rna17089	gene9755	protein_coding	o	198.596	302.805	226.618	316.036	229.737	253.756	360.153	305.692	274.174	0.135952	0.310968	0.43719	0.661974	0.999991
1142	NC_005102.4	-	105235255	105235241	105235277	Scg5	rna16431	gene9419	protein_coding	c	103.27	361.889	180.563	214.282	224.77	348.748	200.741	404.005	254.784	0.449105	0.425165	1.05631	0.290828	0.999991
1143	NC_005101.4	-	29688372	29688288	29688412	Map1b	rna9457	gene5231	protein_coding	c	375.347	242.378	419.609	288.503	396.141	156.106	272.575	195.858	293.315	-0.379702	0.37619	-1.00934	0.312814	0.999991
1144	NC_005109.4	+	63658364	63658346	63658568	Prpf8	rna44423	gene24404	protein_coding	o	206.54	213.508	208.342	302.868	233.463	389.934	293.239	320.285	271.022	0.411655	0.306767	1.34191	0.179624	0.999991
1145	NC_005109.4	+	67865239	67865220	67865458	Cdk5r1	rna44645	gene24535	protein_coding	p	198.596	322.947	269.748	245.407	157.711	284.977	261.751	362.529	262.958	0.0399596	0.344961	0.115838	0.907781	0.999991
1146	NC_005104.4	-	153233963	153233941	153233998	Tmem50a	rna26321	gene14835	protein_coding	o	224.414	265.877	156.439	146.047	265.75	485.591	161.38	380.194	260.712	0.707617	0.403409	1.75409	0.0794147	0.999991
1147	NC_005105.4	+	91700432	91700403	91700720	-	-	-	-	u	341.586	241.035	260.976	293.291	327.841	221.206	321.776	300.315	288.503	0.0455375	0.288838	0.157658	0.874726	0.999991
1148	NC_005119.4	-	11746373	11746362	11746392	Pttg1ip	rna66690	gene36696	protein_coding	c	341.586	244.392	270.479	276.532	260.783	294.942	273.559	289.562	281.479	-0.0125865	0.264771	-0.0475372	0.962085	0.999991
1149	NC_005109.4	-	64565125	64565113	64565162	Abr	rna44476	gene24433	protein_coding	o	244.274	243.05	236.121	229.844	221.044	247.113	341.457	419.366	272.784	0.36779	0.311521	1.18063	0.237751	0.999991
1150	NC_005104.4	-	165966133	165966109	165966146	Pgd	rna26897	gene15118	protein_coding	o	218.456	213.508	303.376	290.897	284.377	315.534	234.198	315.677	272.003	0.162989	0.288801	0.564365	0.572506	0.999991
1151	NC_005100.4	-	154147099	154147087	154147123	Hikeshi	rna4573	gene2597	protein_coding	o	194.624	290.048	315.072	306.459	229.737	273.02	278.479	261.912	268.669	-0.089019	0.287399	-0.30974	0.756758	0.999991
1152	NC_005112.4	-	40914436	40914435	40914436	Dpp10	rna51003	gene27946	protein_coding	i	137.032	370.617	100.151	263.363	497.971	272.356	188.933	350.24	272.583	0.583888	0.465448	1.25447	0.209673	0.999991
1153	NC_005100.4	+	102456318	102456280	102456559	Kcnc1	rna3614	gene2036	protein_coding	c	214.484	281.991	271.211	289.7	309.214	298.927	222.39	282.65	271.321	0.070708	0.277854	0.254479	0.799125	0.999991
1154	NC_005107.4	-	61833343	61833327	61833366	Commd4	rna36482	gene20493	protein_coding	o	317.754	232.978	217.115	252.589	384.965	269.699	261.751	335.646	284.062	0.299038	0.293596	1.01854	0.308423	0.999991
1155	NC_005109.4	-	55411895	55411883	55411904	Ndel1	rna43754	gene24065	protein_coding	c	139.017	308.176	298.989	269.349	194.966	292.284	311.936	273.433	261.019	0.0734936	0.346919	0.211847	0.832227	0.999991
1156	NC_005120.4	-	13261555	13261539	13261573	Tspan7	rna67725	gene37322	protein_coding	o	97.3122	402.845	269.017	237.027	173.855	310.884	262.735	262.68	252.044	0.000185628	0.422877	0.000438965	0.99965	0.999991
1157	NC_005103.4	-	134290827	134290821	134290827	LOC500273	rna21578	gene12313	protein_coding	p	295.909	327.647	273.404	246.604	346.468	157.435	302.096	298.779	281.043	-0.0524447	0.331537	-0.158186	0.87431	0.999991
1158	NC_005105.4	+	3271519	3271517	3271541	Cdkl4	rna27457	gene15338	protein_coding	i	566	281.32	509.525	232.239	348.952	174.042	195.821	69.8943	297.224	-1.01224	0.482732	-2.0969	0.0360027	0.999991
1159	NC_005119.4	+	42970271	42970238	42970400	Marcks	rna67352	gene37067	protein_coding	c	119.158	310.19	302.645	302.868	91.8949	327.491	310.952	273.433	254.829	-0.0462004	0.453844	-0.101798	0.918917	0.999991
1160	NC_005106.4	-	75801732	75801713	75801751	Zfp706	rna32555	gene18409	protein_coding	p	164.835	348.461	206.149	263.363	291.828	459.019	228.294	127.5	261.181	0.168494	0.428352	0.393355	0.694058	0.999991
1161	NC_005103.4	+	50229078	50229066	50229194	LOC685467	gene11165	gene11165	pseudogene	o	144.975	290.72	291.679	240.618	155.228	383.291	239.118	284.954	253.823	0.131645	0.378608	0.347708	0.728059	0.999991
1162	NC_005111.4	+	48351974	48351953	48352099	Svop	rna50555	gene27661	protein_coding	o	266.119	216.865	238.314	232.239	404.834	397.241	174.172	261.912	273.962	0.378411	0.346747	1.09132	0.275133	0.999991
1163	NC_005101.4	-	260110310	260110300	260110359	Rabggtb	rna13601	gene7673	protein_coding	o	194.624	273.934	178.37	307.656	268.234	253.092	378.85	330.27	273.129	0.364613	0.319633	1.14072	0.253985	0.999991
1164	NC_005104.4	+	145304535	145304506	145304786	Dlgap3	rna25916	gene14654	protein_coding	o	218.456	233.65	320.189	330.401	224.77	342.77	225.342	245.782	267.67	-0.0865699	0.310389	-0.278907	0.780316	0.999991
1165	NC_005101.4	-	196198304	196198294	196198334	Psmd4	rna12093	gene6828	protein_coding	o	232.358	268.563	258.052	264.56	279.41	358.048	219.438	260.376	267.601	0.125899	0.284558	0.442436	0.658174	0.999991
1166	NC_005106.4	+	3335582	3335570	3335914	Cd63	rna30747	gene17240	protein_coding	o	150.933	301.462	187.143	156.821	162.679	496.883	199.757	323.357	247.379	0.568618	0.425188	1.33734	0.181113	0.999991
1167	NC_005107.4	+	61607914	61607881	61608225	Imp3	rna36454	gene20484	protein_coding	o	289.951	268.563	226.618	301.671	243.397	312.877	269.623	281.114	274.227	0.0306008	0.268545	0.11395	0.909277	0.999991
1168	NC_005107.4	+	50497905	50497857	50498071	Sik3	rna36064	gene20299	protein_coding	i	307.824	214.179	228.08	243.013	413.527	269.699	259.783	324.125	282.529	0.35486	0.30041	1.18126	0.237501	0.999991
1169	NC_005109.4	+	50205770	50205760	50205879	-	-	-	-	u	168.807	338.389	229.542	304.065	291.828	241.799	211.565	339.487	265.685	0.0548335	0.335312	0.16353	0.870101	0.999991
1170	NC_005118.4	-	4109007	4108968	4109017	-	-	-	-	u	393.221	238.35	272.673	215.479	367.579	215.228	239.118	339.487	285.142	0.0561728	0.337031	0.166669	0.86763	0.999991
1171	NC_005120.4	+	15123828	15123786	15124030	Wdr13	rna67810	gene37363	protein_coding	o	238.316	300.791	284.369	229.844	252.09	207.256	341.457	306.46	270.073	0.0685354	0.297108	0.230675	0.817567	0.999991
1172	NC_005105.4	-	128795171	128795167	128795172	-	-	-	-	u	238.316	290.72	160.826	486.025	434.638	199.949	399.514	132.876	292.858	-0.0125968	0.466566	-0.026999	0.97846	0.999991
1173	NC_005111.4	+	17755247	17755233	17755583	Pdgfa	rna49396	gene27059	protein_coding	c	307.824	268.563	255.128	300.474	321.632	238.477	246.006	295.707	279.226	-0.0377344	0.270009	-0.139753	0.888855	0.999991
1174	NC_005106.4	-	117779737	117779718	117779753	Lrrc24	rna33338	gene18806	protein_coding	o	399.179	237.678	302.645	213.085	435.88	240.47	199.757	259.608	286.038	-0.0197149	0.363433	-0.0542463	0.956739	0.999991
1175	NC_005102.4	+	72230088	72230075	72230227	Timm10	rna15615	gene8756	protein_coding	o	397.193	214.85	270.479	270.546	382.481	264.385	242.07	252.695	286.837	-0.0104278	0.323483	-0.0322361	0.974284	0.999991
1176	NC_005101.4	+	179397243	179397109	179397574	-	-	-	-	u	91.3543	357.189	200.301	271.743	248.364	242.463	269.623	365.601	255.83	0.284447	0.412703	0.68923	0.490679	0.999991
1177	NC_005107.4	-	52802604	52802597	52802623	Rexo2	rna36143	gene20332	protein_coding	c	254.203	233.65	239.776	276.532	201.175	373.327	267.655	274.201	265.065	0.156563	0.300188	0.521551	0.601983	0.999991
1178	NC_005105.4	-	26486828	26486820	26486833	Nrbp1	rna27858	gene15580	protein_coding	c	131.074	347.118	248.549	262.166	193.724	344.763	177.124	299.547	250.508	0.0341114	0.387149	0.0881093	0.92979	0.999991
1179	NC_005116.4	+	78876544	78876486	78876759	Rpl34-ps1	gene33973	gene33973	pseudogene	o	178.737	285.348	149.129	201.114	170.13	396.577	187.949	440.872	251.232	0.554378	0.411369	1.34764	0.177773	0.999991
1180	NC_005101.4	-	196384032	196384011	196384032	Gabpb2	rna12135	gene6836	protein_coding	i	99.2982	760.034	206.88	142.456	86.9276	245.785	143.668	165.135	231.273	-0.916149	0.581939	-1.5743	0.115417	0.999991
1181	NC_005103.4	-	15706977	15706968	15706993	Cacna2d1	rna19280	gene10904	protein_coding	c	135.046	277.291	217.115	348.358	130.391	266.377	415.259	298.011	260.981	0.180936	0.423544	0.427195	0.669237	0.999991
1182	NC_005101.4	-	33882775	33882767	33882780	Erbin	rna9549	gene5285	protein_coding	c	289.951	204.779	288.024	237.027	325.357	212.57	273.559	368.673	274.993	0.21217	0.308238	0.688331	0.491245	0.999991
1183	NC_005104.4	-	139475937	139475927	139475955	Ctps1	rna25671	gene14530	protein_coding	c	282.007	229.621	212.728	284.911	342.743	282.984	259.783	309.532	275.539	0.247092	0.275504	0.896873	0.369787	0.999991
1184	NC_005118.4	-	40904777	40904761	40904787	Mtss1l	rna65095	gene35749	protein_coding	o	188.667	205.451	406.45	362.723	202.417	254.42	405.418	125.195	268.843	-0.23896	0.430021	-0.555692	0.578421	0.999991
1185	NC_005106.4	-	115982881	115982834	115982894	Lynx1	rna33099	gene18714	protein_coding	o	270.091	294.748	228.08	237.027	221.044	264.385	212.549	383.267	263.899	0.0721713	0.313289	0.230367	0.817807	0.999991
1186	NC_005107.4	+	61816807	61816791	61817054	Man2c1	rna36476	gene20490	protein_coding	o	293.923	242.378	260.976	283.714	262.025	267.042	303.08	268.824	272.745	0.0292691	0.255876	0.114388	0.90893	0.999991
1187	NC_005115.4	-	14370281	14370265	14370331	Ghitm	rna58365	gene31963	protein_coding	c	228.386	269.906	271.942	290.897	275.685	306.899	265.687	220.436	266.23	0.00789598	0.270876	0.0291498	0.976745	0.999991
1188	NC_005105.4	+	132273793	132273768	132274025	Cyp46a1	rna29970	gene16753	protein_coding	o	196.61	267.892	255.859	183.157	252.09	400.562	219.438	262.68	254.786	0.326529	0.323092	1.01064	0.31219	0.999991
1189	NC_005103.4	-	113738224	113738210	113738230	Sema4f	rna20987	gene11991	protein_coding	o	371.375	246.407	236.121	320.824	281.894	170.056	346.377	301.083	284.267	-0.0925875	0.33571	-0.275796	0.782705	0.999991
1190	NC_005106.4	-	3104550	3104518	3104564	Rab5b	rna30687	gene17227	protein_coding	o	250.231	274.606	211.266	254.984	335.292	228.513	305.048	314.909	271.856	0.255135	0.279652	0.912329	0.361595	0.999991
1191	NC_005114.4	-	55255339	55255307	55255359	Itm2b	rna57208	gene31335	protein_coding	c	170.793	281.32	214.922	220.268	122.94	333.47	310.952	360.225	251.861	0.344676	0.386011	0.892917	0.371902	0.999991
1192	NC_005100.4	+	220119980	220119961	220120172	Ctsf	rna7107	gene3941	protein_coding	o	323.712	245.735	316.534	336.387	317.907	178.028	279.463	242.71	280.059	-0.264736	0.305124	-0.867634	0.385595	0.999991
1193	NC_005109.4	-	15349611	15349604	15349635	Rab11fip3	rna42559	gene23387	protein_coding	c	212.498	294.077	340.658	252.589	271.959	277.006	276.511	174.352	262.456	-0.142861	0.311291	-0.45893	0.646285	0.999991
1194	NC_005106.4	+	80788095	80788076	80788232	Oxr1	rna32684	gene18452	protein_coding	o	150.933	288.705	304.838	312.445	124.182	259.735	326.696	274.969	255.313	-0.103332	0.389161	-0.265525	0.790605	0.999991
1195	NC_005109.4	+	86335872	86335846	86336133	Stard3	rna45417	gene24907	protein_coding	o	363.431	255.806	224.425	169.989	337.776	286.306	189.917	347.167	271.852	0.200532	0.351862	0.569917	0.568734	0.999991
1196	NC_005100.4	-	260467866	260467850	260467883	Tm9sf3	rna8416	gene4658	protein_coding	c	256.189	210.822	279.983	268.152	288.103	288.299	278.479	277.273	268.412	0.15839	0.260088	0.608988	0.542532	0.999991
1197	NC_005115.4	+	21282271	21282226	21282463	Yjefn3	rna58731	gene32127	protein_coding	o	377.333	257.821	195.915	177.172	411.043	275.013	180.077	338.719	276.636	0.26112	0.378793	0.689349	0.490604	0.999991
1198	NC_005109.4	-	47719032	47719008	47719090	Rnf112	rna43552	gene23965	protein_coding	o	335.628	185.309	188.605	341.175	496.729	240.47	257.815	265.752	288.935	0.265753	0.381101	0.697329	0.485597	0.999991
1199	NC_005113.4	-	104338487	104338472	104338525	Actr2	rna55304	gene30141	protein_coding	o	59.5789	294.077	220.77	357.935	145.293	320.184	374.914	236.565	251.165	0.204391	0.497051	0.411207	0.680921	0.999991
1200	NC_005115.4	-	20675052	20675029	20675075	Crlf1	rna58662	gene32098	protein_coding	o	226.4	276.62	200.301	235.83	275.685	320.184	243.054	313.372	261.431	0.295126	0.27605	1.0691	0.285023	0.999991
1201	NC_005104.4	+	137260482	137260471	137260845	Elovl1	rna25541	gene14455	protein_coding	o	333.642	253.121	295.334	262.166	348.952	284.977	202.709	207.379	273.535	-0.131412	0.308646	-0.42577	0.670275	0.999991
1202	NC_005104.4	+	70575396	70575386	70575575	Fktn	rna24289	gene13769	protein_coding	c	285.979	320.261	255.128	217.873	334.05	271.027	208.613	237.334	266.283	-0.0399534	0.29831	-0.133933	0.893456	0.999991
1203	NC_005108.4	+	94338868	94338849	94339085	-	-	-	-	u	423.01	231.636	252.935	244.21	379.998	202.606	244.038	294.171	284.075	-0.0355237	0.345344	-0.102865	0.91807	0.999991
1204	NC_005100.4	+	226958147	226958103	226958484	Prpf19	rna7675	gene4194	protein_coding	o	172.779	238.35	255.128	251.392	224.77	338.784	187.949	356.384	253.192	0.270211	0.332449	0.81279	0.416338	0.999991
1205	NC_005109.4	+	65452182	65452132	65452405	Rab34	rna44530	gene24461	protein_coding	o	434.926	159.795	201.032	205.902	438.363	254.42	244.038	351.776	286.282	0.370518	0.396714	0.933966	0.350322	0.999991
1206	NC_005111.4	-	40093119	40093119	40093119	Cux2	rna50212	gene27500	protein_coding	i	373.361	287.363	475.167	301.671	296.796	174.042	231.246	70.6624	276.288	-0.898851	0.42989	-2.09088	0.0365384	0.999991
1207	NC_005102.4	-	147238114	147238103	147238137	Psmf1	rna17605	gene10045	protein_coding	o	389.249	239.021	230.273	298.079	454.507	150.128	275.527	274.201	288.873	-0.00159671	0.387592	-0.00411956	0.996713	0.999991
1208	NC_005107.4	+	28053974	28053960	28054278	Thyn1	rna35383	gene19868	protein_coding	o	335.628	224.25	224.425	293.291	320.39	282.32	255.846	262.68	274.854	0.0625287	0.286249	0.218441	0.827085	0.999991
1209	NC_005107.4	+	122511458	122511434	122511648	Glb1	rna38345	gene21352	protein_coding	c	421.024	220.893	236.852	240.618	343.985	200.613	263.719	326.43	281.767	0.0248535	0.344114	0.0722245	0.942423	0.999991
1210	NC_005111.4	+	36642740	36642714	36643188	Ubc	rna50010	gene27407	protein_coding	o	583.873	153.081	216.384	210.691	337.776	211.906	184.997	432.423	291.391	0.0104186	0.47057	0.0221403	0.982336	0.999991
1211	NC_005103.4	-	93405662	93405641	93405664	Hint1-ps1	gene11791	gene11791	pseudogene	p	482.589	220.222	426.188	207.099	206.143	294.277	192.869	156.686	273.259	-0.648712	0.389017	-1.66757	0.0954018	0.999991
1212	NC_005100.4	-	78845111	78845079	78845115	Calm3	rna1950	gene1260	protein_coding	c	109.228	51.027	804.128	164.004	120.457	215.228	431.987	82.1835	247.28	-0.411412	0.713435	-0.576664	0.564166	0.999991
1213	NC_005107.4	+	117795925	117795910	117796208	Shisa5	rna38066	gene21259	protein_coding	o	472.659	190.008	211.997	260.969	351.436	287.634	256.831	251.927	285.433	0.0226449	0.364776	0.062079	0.9505	0.999991
1214	NC_005100.4	-	198451324	198451321	198451338	Prrt2	rna6045	gene3431	protein_coding	c	383.291	237.007	243.432	296.882	361.37	231.835	319.808	185.873	282.437	-0.076489	0.337794	-0.226436	0.820862	0.999991
1215	NC_005115.4	-	46879635	46879626	46879645	Tenm3	rna59001	gene32314	protein_coding	i	351.516	179.266	434.229	343.57	500.454	130.199	371.961	23.8102	291.876	-0.352085	0.644354	-0.546415	0.584781	0.999991
1216	NC_005101.4	-	77783804	77783774	77783822	LOC310177	gene5638	gene5638	pseudogene	o	351.516	263.192	252.935	269.349	381.239	200.613	281.431	228.117	278.549	-0.0585214	0.319129	-0.183378	0.854501	0.999991
1217	NC_005106.4	-	11013051	11013032	11013076	Aes	rna30918	gene17474	protein_coding	c	91.3543	322.276	233.197	248.998	124.182	446.398	177.124	248.087	236.452	0.149968	0.476996	0.314402	0.753216	0.999991
1218	NC_005109.4	-	97859729	97859720	97859780	Wipi1	rna46178	gene25266	protein_coding	o	355.488	271.92	247.087	298.079	418.494	199.949	291.271	171.28	281.696	-0.117851	0.359672	-0.327663	0.743167	0.999991
1219	NC_005109.4	-	108415199	108415180	108415218	Eif4a3	rna46650	gene25491	protein_coding	o	301.867	253.792	157.171	243.013	252.09	314.87	259.783	336.415	264.875	0.2897	0.313079	0.925328	0.354795	0.999991
1220	NC_005109.4	+	67775175	67775127	67775430	Zfp207	rna44637	gene24531	protein_coding	o	194.624	240.364	214.922	237.027	206.143	342.106	300.128	301.083	254.55	0.373872	0.290548	1.28678	0.19817	0.999991
1221	NC_005106.4	-	121303704	121303698	121303792	-	-	-	-	u	107.242	264.535	107.461	214.282	226.012	386.613	169.252	473.131	243.566	0.853008	0.445514	1.91466	0.0555358	0.999991
1222	NC_005114.4	+	43590885	43590850	43591126	Pnma2	rna56857	gene31161	protein_coding	p	190.653	255.135	134.509	149.638	273.201	376.648	190.901	429.351	250.004	0.799792	0.370902	2.15634	0.0310568	0.999991
1223	NC_005112.4	-	90653486	90653451	90653508	Atp1a2	rna52438	gene28633	protein_coding	c	333.642	232.978	278.521	292.094	485.553	223.863	214.517	182.033	280.4	-0.0411416	0.37909	-0.108527	0.913577	0.999991
1224	NC_005114.4	-	28728479	28728473	28728485	Sall2	rna56321	gene30685	protein_coding	c	270.091	280.648	230.273	323.219	264.508	277.006	352.281	150.542	268.571	-0.0807805	0.338074	-0.238943	0.81115	0.999991
1225	NC_005108.4	+	41303409	41303363	41303563	Arhgef4	rna39761	gene22081	protein_coding	c	125.116	340.404	136.702	254.984	242.155	441.748	242.07	187.409	246.323	0.373977	0.428287	0.873192	0.382558	0.999991
1226	NC_005101.4	-	264080028	264080019	264080028	-	-	-	-	u	452.8	275.277	225.156	199.917	433.396	170.721	206.645	298.779	282.836	-0.0531792	0.405841	-0.131034	0.895748	0.999991
1227	NC_005100.4	-	7816844	7816818	7816852	Aig1	rna124	gene96	protein_coding	o	325.698	225.593	233.928	302.868	345.227	318.191	244.038	183.569	272.389	0.00682015	0.324015	0.0210489	0.983207	0.999991
1228	NC_005111.4	+	38894089	38894076	38894316	Rhof	rna50146	gene27465	protein_coding	o	434.926	209.479	236.121	269.349	304.247	258.406	233.214	276.505	277.781	-0.0935925	0.327772	-0.285542	0.775229	0.999991
1229	NC_005105.4	+	9976198	9976126	9976350	-	-	-	-	u	152.919	259.835	262.438	258.575	176.339	300.92	341.457	251.927	250.551	0.193443	0.338208	0.571966	0.567345	0.999991
1230	NC_005110.4	+	36511450	36511403	36511584	Wrb	rna47383	gene25935	protein_coding	o	389.249	198.737	264.631	207.099	304.247	276.342	284.383	254.999	272.461	0.0860475	0.318681	0.270011	0.787152	0.999991
1231	NC_005114.4	-	2634983	2634971	2634993	Vdac2	rna55577	gene30282	protein_coding	c	156.891	259.835	255.128	232.239	264.508	370.005	258.799	205.075	250.31	0.275906	0.324281	0.850822	0.394868	0.999991
1232	NC_005104.4	+	115650349	115650315	115650476	LOC108351137	rna24888	gene14152	protein_coding	p	421.024	255.806	381.595	202.311	117.973	331.477	143.668	218.132	258.998	-0.630683	0.412641	-1.5284	0.126412	0.999991
1233	NC_005102.4	-	147793014	147793011	147793028	Rbck1	rna17636	gene10057	protein_coding	c	172.779	238.35	195.915	250.195	288.103	359.377	259.783	269.592	254.262	0.454661	0.288007	1.57864	0.114418	0.999991
1234	NC_005107.4	+	70627332	70627312	70627464	Igdcc4	rna36820	gene20644	protein_coding	o	262.147	239.693	166.674	256.181	263.266	318.856	280.447	305.692	261.619	0.342536	0.286252	1.19662	0.231453	0.999991
1235	NC_005109.4	+	88996682	88996651	88996897	Coasy	rna45665	gene25041	protein_coding	o	329.67	206.794	169.598	254.984	408.56	213.899	230.262	385.571	274.917	0.370397	0.362635	1.0214	0.307063	0.999991
1236	NC_005103.4	-	71703869	71703859	71703874	Fam131b	rna20198	gene11458	protein_coding	o	285.979	237.678	227.349	228.647	584.898	180.685	227.31	253.463	278.251	0.346077	0.404817	0.854897	0.392608	0.999991
1237	NC_005106.4	+	2451170	2451147	2451404	Prim1	rna30577	gene17187	protein_coding	o	391.235	228.279	239.776	306.459	357.645	149.464	244.038	323.357	280.032	-0.115051	0.366434	-0.313975	0.75354	0.999991
1238	NC_005103.4	-	157479906	157479891	157479981	Cops7a	rna22227	gene12610	protein_coding	c	242.288	247.749	241.238	268.152	212.352	229.178	334.568	307.996	260.44	0.117861	0.288027	0.409203	0.682391	0.999991
1239	NC_005112.4	-	96229942	96229934	96229957	Hnrnpu	rna52622	gene28753	protein_coding	c	391.235	171.209	358.203	177.172	314.181	196.628	247.974	315.677	271.535	-0.0282945	0.381556	-0.0741555	0.940887	0.999991
1240	NC_005118.4	+	14663925	14663898	14664004	Rasd2	rna64165	gene35261	protein_coding	o	309.81	196.051	279.983	221.465	253.332	280.992	200.741	348.704	261.385	0.110405	0.315683	0.349735	0.726537	0.999991
1241	NC_005100.4	-	3620540	3620540	3620542	-	-	-	-	u	206.54	281.32	233.928	201.114	147.777	148.799	163.348	599.862	247.836	0.199606	0.483969	0.412435	0.680021	0.999991
1242	NC_005100.4	-	174524046	174524026	174524063	Dennd5a	rna5381	gene3124	protein_coding	o	262.147	226.264	310.686	337.584	228.495	392.591	226.326	91.4003	259.437	-0.275077	0.423058	-0.650212	0.515555	0.999991
1243	NC_005109.4	+	10876322	10876306	10876593	LOC679823	gene23152	gene23152	pseudogene	o	264.133	264.535	211.997	243.013	309.214	225.856	184.013	384.803	260.945	0.167433	0.327849	0.5107	0.609561	0.999991
1244	NC_005119.4	-	5161350	5161341	5161363	Aif1	rna66282	gene36493	protein_coding	o	337.614	232.307	293.872	342.372	227.254	204.599	308	220.436	270.807	-0.326608	0.296776	-1.10052	0.271106	0.999991
1245	NC_005104.4	-	155690268	155690257	155690287	Cdc42	rna26436	gene14890	protein_coding	o	214.484	253.121	200.301	284.911	185.032	350.741	326.696	221.204	254.561	0.186919	0.328143	0.569626	0.568932	0.999991
1246	NC_005100.4	+	168958840	168958819	168958971	LOC100134871	rna5111	gene2888	protein_coding	o	323.712	357.86	140.357	143.653	94.3785	459.684	235.182	213.523	246.044	0.0581768	0.498871	0.116617	0.907164	0.999991
1247	NC_005104.4	-	152736579	152736576	152736595	Mtfr1l	rna26312	gene14828	protein_coding	c	180.723	275.949	171.791	226.253	228.495	339.448	221.406	337.183	247.656	0.397393	0.32157	1.23579	0.216536	0.999991
1248	NC_005110.4	-	83104911	83104901	83104960	Vps8	rna48428	gene26537	protein_coding	o	274.063	222.907	242.701	235.83	327.841	256.413	255.846	287.258	262.857	0.210532	0.264996	0.794473	0.42692	0.999991
1249	NC_005119.4	+	29681724	29681653	29682022	Spock2	rna67110	gene36922	protein_coding	p	152.919	275.949	230.273	336.387	218.561	288.299	287.335	225.044	251.846	0.0303583	0.331106	0.0916876	0.926946	0.999991
1250	NC_005102.4	-	152381668	152381653	152381680	Scand1	rna17937	gene10199	protein_coding	o	212.498	269.906	298.258	222.662	257.057	257.077	215.501	278.809	251.471	0.00311775	0.278077	0.0112118	0.991054	0.999991
1251	NC_005100.4	-	15389314	15389311	15389328	LOC102547604	rna235	gene173	protein_coding	p	663.312	247.749	356.741	283.714	404.834	145.478	194.837	81.4154	297.26	-0.908856	0.498631	-1.8227	0.0683482	0.999991
1252	NC_005101.4	+	252771288	252771270	252771525	LOC108350133	rna13499	gene7612	protein_coding	e	536.21	288.034	201.032	120.908	660.65	144.149	143.668	234.261	291.114	0.0465464	0.564057	0.0825207	0.934233	0.999991
1253	NC_005109.4	+	97959188	97959161	97959402	Prkar1a	rna46182	gene25268	protein_coding	o	107.242	316.904	254.397	247.801	141.568	331.477	242.07	256.535	237.249	0.0647113	0.405533	0.159571	0.873219	0.999991
1254	NC_005102.4	-	176415912	176415900	176415925	Ythdf1	rna18804	gene10640	protein_coding	o	403.151	226.936	220.77	240.618	439.605	242.463	195.821	239.638	276.125	0.0373343	0.372105	0.100333	0.92008	0.999991
1255	NC_005113.4	+	82268450	82268432	82268539	Letm1	rna54764	gene29905	protein_coding	p	246.26	270.577	253.666	251.392	303.005	239.806	297.176	215.828	259.714	0.0439402	0.271484	0.161852	0.871423	0.999991
1256	NC_005109.4	-	35265033	35265026	35265053	-	-	-	-	u	345.558	277.963	376.478	246.604	298.037	104.292	161.38	308.764	264.885	-0.516328	0.399889	-1.29118	0.196642	0.999991
1257	NC_005116.4	-	68510766	68510752	68510780	Pfkp	rna61731	gene33865	protein_coding	o	212.498	250.435	310.686	272.94	157.711	314.206	292.255	185.873	249.576	-0.140235	0.337206	-0.415874	0.677503	0.999991
1258	NC_005119.4	-	47732352	47732310	47732378	Sobp	rna67468	gene37139	protein_coding	c	369.389	186.651	197.377	243.013	418.494	253.092	209.597	307.228	273.105	0.259773	0.360144	0.721302	0.470724	0.999991
1259	NC_005109.4	-	88257975	88257959	88257997	Hap1	rna45597	gene25012	protein_coding	o	105.256	309.519	185.681	173.58	221.044	518.14	117.099	212.755	230.384	0.462325	0.484455	0.95432	0.339922	0.999991
1260	NC_005106.4	+	70571436	70571284	70571576	Dctn2	rna32380	gene18317	protein_coding	o	262.147	272.592	193.722	192.734	240.914	300.92	205.661	341.023	251.214	0.243852	0.31063	0.785025	0.432439	0.999991
1261	NC_005109.4	+	89380098	89380087	89380293	Rnd2	rna45723	gene25068	protein_coding	o	85.3965	288.705	272.673	213.085	116.731	358.048	194.837	311.836	230.164	0.186978	0.461171	0.405443	0.685152	0.999991
1262	NC_005103.4	-	120453578	120453566	120453606	Sec61a1	rna21320	gene12160	protein_coding	o	97.3122	286.691	241.969	269.349	191.241	281.656	316.856	250.391	241.933	0.210173	0.383933	0.547421	0.584089	0.999991
1263	NC_005113.4	-	44293265	44293263	44293310	Ube2k	rna54180	gene29589	protein_coding	c	208.526	269.906	239.045	300.474	177.581	366.02	254.862	168.975	248.174	-0.0730001	0.348487	-0.209477	0.834076	0.999991
1264	NC_005119.4	-	5712200	5712193	5712205	Uqcc2	rna66363	gene36541	protein_coding	c	303.852	169.866	339.196	259.772	263.266	288.299	192.869	252.695	258.727	-0.102564	0.326537	-0.314095	0.753449	0.999991
1265	NC_005109.4	+	14253819	14253799	14254005	Spsb3	rna42394	gene23321	protein_coding	o	377.333	236.336	253.666	214.282	310.456	253.092	168.268	297.243	263.834	-0.0672636	0.336071	-0.200147	0.841366	0.999991
1266	NC_005113.4	+	38622588	38622525	38622838	Commd8	rna54098	gene29548	protein_coding	o	99.2982	255.806	175.446	324.416	122.94	572.612	163.348	142.861	232.091	0.2283	0.538333	0.424087	0.671502	0.999991
1267	NC_005100.4	-	220967795	220967780	220967830	Kat5	rna7220	gene4004	protein_coding	o	379.319	249.092	137.433	265.758	304.247	308.891	200.741	282.65	266.016	0.0947818	0.366216	0.258814	0.795779	0.999991
1268	NC_005106.4	-	11012842	11012834	11012901	Aes	rna30918	gene17474	protein_coding	o	268.105	232.978	203.956	292.094	274.443	292.949	245.022	257.303	258.356	0.105261	0.272904	0.385706	0.699714	0.999991
1269	NC_005112.4	-	88023106	88023103	88023123	-	-	-	-	u	89.3684	276.62	198.108	356.738	300.521	270.363	293.239	212.755	249.714	0.220334	0.411144	0.535905	0.592024	0.999991
1270	NC_005108.4	-	64218637	64218622	64218655	-	-	-	-	u	154.905	315.562	187.874	272.94	245.881	274.349	202.709	304.924	244.893	0.138321	0.336096	0.411554	0.680667	0.999991
1271	NC_005109.4	-	109754021	109753999	109754037	Arhgdia	rna46749	gene25540	protein_coding	o	240.302	298.776	212.728	173.58	202.417	402.555	106.275	280.345	239.622	0.101265	0.419458	0.241418	0.809231	0.999991
1272	NC_005107.4	-	46525408	46525392	46525422	Sc5d	rna35854	gene20211	protein_coding	o	204.554	257.149	214.922	254.984	204.901	302.913	299.144	249.623	248.524	0.181058	0.284993	0.635306	0.525229	0.999991
1273	NC_005117.4	+	4346737	4346712	4347047	Impact	rna62305	gene34178	protein_coding	o	81.4245	328.318	167.405	227.45	165.162	390.598	258.799	237.334	232.061	0.38164	0.444542	0.858502	0.390615	0.999991
1274	NC_005108.4	+	16610429	16610401	16610581	Ppp2r5d	rna39266	gene21837	protein_coding	o	234.344	262.52	218.577	239.421	309.214	272.356	230.262	261.144	253.48	0.166858	0.265083	0.629456	0.52905	0.999991
1275	NC_005117.4	-	81521968	81521960	81521987	Cndp2	rna63796	gene35049	protein_coding	c	188.667	228.95	251.473	300.474	248.364	324.17	181.061	256.535	247.462	0.0582011	0.314314	0.185169	0.853097	0.999991
1276	NC_005109.4	-	4635892	4635874	4635970	Snn	rna41899	gene23073	protein_coding	o	403.151	183.294	198.108	268.152	396.141	229.842	276.511	245.014	275.027	0.129946	0.362549	0.358425	0.720025	0.999991
1277	NC_005118.4	-	10583859	10583853	10583867	Coq9	rna64056	gene35197	protein_coding	c	142.989	232.307	282.176	269.349	166.404	241.799	329.648	286.49	243.895	0.140338	0.351188	0.399608	0.689445	0.999991
1278	NC_005106.4	+	144926308	144926278	144926550	Copz1	rna34704	gene19427	protein_coding	o	319.74	252.449	300.452	195.128	202.417	271.027	201.725	265.752	251.086	-0.178648	0.302367	-0.590832	0.554633	0.999991
1279	NC_005112.4	-	66018007	66018006	66018010	-	-	-	-	u	79.4386	277.963	317.996	272.94	197.45	219.213	244.038	289.562	237.325	-0.00337482	0.416851	-0.00809598	0.99354	0.999991
1280	NC_005103.4	+	77492021	77491997	77492216	Zfp786	rna20275	gene11518	protein_coding	i	287.965	200.08	345.775	203.508	218.561	308.891	237.15	198.93	250.107	-0.104663	0.324731	-0.322307	0.74722	0.999991
1281	NC_005104.4	+	55719579	55719569	55719984	-	-	-	-	u	413.081	230.293	483.208	293.291	221.044	251.099	152.524	45.3161	261.232	-1.08366	0.483558	-2.24102	0.025025	0.999991
1282	NC_005109.4	-	112564198	112564190	112564227	Rpl5l1	gene25620	gene25620	pseudogene	c	337.614	222.236	156.439	199.917	234.704	342.77	201.725	334.11	253.689	0.289726	0.353796	0.818907	0.41284	0.999991
1283	NC_005111.4	-	23941445	23941426	23941474	Mdh2	rna49747	gene27267	protein_coding	o	87.3824	312.876	255.859	244.21	45.9474	390.598	241.086	225.044	225.375	0.00209457	0.553291	0.00378566	0.996979	0.999991
1284	NC_005106.4	+	122192272	122192254	122192419	Adsl	rna33667	gene18935	protein_coding	o	268.105	226.264	270.479	278.926	212.352	230.506	261.751	281.882	253.783	-0.0789958	0.2684	-0.294321	0.768512	0.999991
1285	NC_005103.4	+	54665779	54665753	54666141	Grm8	rna19748	gene11197	protein_coding	i	335.628	224.922	241.969	374.694	181.306	146.142	313.904	301.083	264.956	-0.317914	0.365616	-0.869529	0.384558	0.999991
1286	NC_005102.4	-	105302697	105302697	105302697	LOC108350437	rna16434	gene9421	lncRNA	i	589.831	194.037	290.948	280.123	378.756	131.528	312.92	142.093	290.029	-0.48745	0.465684	-1.04674	0.295219	0.999991
1287	NC_005116.4	+	47422185	47422161	47422526	Epdr1	rna61405	gene33682	protein_coding	o	139.017	255.135	201.032	361.526	197.45	294.277	324.728	201.234	246.8	0.0866648	0.373997	0.231726	0.816751	0.999991
1288	NC_005101.4	+	198336891	198336829	198337078	Sv2a	rna12235	gene6888	protein_coding	o	103.27	373.303	337.003	175.975	106.797	313.541	191.885	192.785	224.32	-0.301469	0.466162	-0.646704	0.517824	0.999991
1289	NC_005112.4	+	52575055	52575041	52575482	Csrp1	rna51416	gene28122	protein_coding	o	278.035	251.106	203.225	179.566	358.887	278.334	122.019	342.559	251.716	0.27449	0.386199	0.710747	0.477241	0.999991
1290	NC_005101.4	-	29675840	29675835	29675862	Map1b	rna9457	gene5231	protein_coding	c	329.67	320.261	173.253	185.551	255.815	237.813	245.022	285.722	254.139	0.0254684	0.330249	0.0771189	0.938529	0.999991
1291	NC_005113.4	-	86730973	86730968	86730993	-	-	-	-	u	190.653	249.764	209.804	248.998	226.012	288.963	285.367	268.056	245.952	0.246834	0.27257	0.905582	0.365157	0.999991
1292	NC_005108.4	+	11000319	11000312	11000542	Ubxn6	rna39042	gene21722	protein_coding	c	262.147	207.465	260.245	238.224	360.129	217.885	224.358	288.026	257.31	0.171362	0.299623	0.571926	0.567372	0.999991
1293	NC_005115.4	+	20671132	20671099	20671315	Uba52	rna58657	gene32096	protein_coding	o	206.54	250.435	405.719	284.911	135.359	234.492	158.428	248.087	240.496	-0.564269	0.352944	-1.59875	0.109876	0.999991
1294	NC_005118.4	-	37424324	37424312	37424350	Tppp3	rna64933	gene35671	protein_coding	o	160.863	219.55	233.197	201.114	156.47	472.305	146.62	254.999	230.64	0.339036	0.417495	0.812071	0.416751	0.999991
1295	NC_005119.4	-	6420389	6420363	6420449	Cpne5	rna66417	gene36562	protein_coding	c	158.877	228.279	252.204	251.392	158.953	396.577	216.485	224.276	235.88	0.160809	0.365467	0.44001	0.65993	0.999991
1296	NC_005101.4	+	210039454	210039439	210039609	Lamtor5	rna12688	gene7151	protein_coding	o	224.414	260.506	231.004	141.259	258.299	321.513	165.316	319.517	240.228	0.312415	0.347407	0.899277	0.368505	0.999991
1297	NC_005100.4	+	221667243	221667223	221667434	Ehd1	rna7318	gene4047	protein_coding	o	383.291	213.508	210.535	217.873	388.69	212.57	204.677	298.011	266.145	0.111355	0.358759	0.310389	0.756265	0.999991
1298	NC_005106.4	+	128727729	128727669	128727912	Fam19a5	rna33939	gene19059	protein_coding	c	222.428	275.277	229.542	251.392	273.201	265.049	236.166	234.261	248.415	0.0408179	0.260998	0.156392	0.875724	0.999991
1299	NC_005103.4	-	116314703	116314693	116314713	Exoc6b	rna21130	gene12055	protein_coding	c	393.221	272.592	241.969	191.537	350.194	326.827	145.636	148.237	258.777	-0.1768	0.40903	-0.432242	0.665565	0.999991
1300	NC_005113.4	+	114174462	114174442	114174633	Rtn4	rna55512	gene30252	protein_coding	o	71.4947	435.744	213.459	162.806	132.875	336.127	185.981	225.812	220.537	-0.00937281	0.503736	-0.0186066	0.985155	0.999991
1301	NC_005106.4	-	124024001	124023995	124024034	Cyb5r3	rna33777	gene18997	protein_coding	o	156.891	329.661	157.171	181.96	211.11	340.113	163.348	324.125	233.047	0.328425	0.389564	0.843058	0.399196	0.999991
1302	NC_005102.4	-	122808567	122808560	122808603	Idh3B	rna17044	gene9730	protein_coding	c	190.653	218.879	149.86	258.575	245.881	305.57	302.096	305.692	247.151	0.504864	0.296749	1.70132	0.0888837	0.999991
1303	NC_005111.4	-	31319558	31319551	31319595	Ran	rna49950	gene27368	protein_coding	c	101.284	241.707	219.308	289.7	114.248	341.441	294.223	266.52	233.554	0.252068	0.43022	0.585906	0.557939	0.999991
1304	NC_005120.4	-	1687824	1687815	1687842	Usp11	rna67609	gene37233	protein_coding	c	158.877	255.135	250.011	266.955	222.286	302.913	277.495	198.162	241.479	0.0998737	0.312634	0.319459	0.749378	0.999991
1305	NC_005109.4	-	15289533	15289527	15289554	Pigq	rna42542	gene23382	protein_coding	c	208.526	241.035	238.314	195.128	206.143	280.992	211.565	339.487	240.149	0.233523	0.301073	0.775637	0.437963	0.999991
1306	NC_005102.4	+	79694121	79694090	79694293	Mtch2	rna15940	gene9131	protein_coding	c	274.063	155.767	273.404	213.085	238.43	252.427	252.894	343.327	250.425	0.251151	0.316955	0.792388	0.428135	0.999991
1307	NC_005101.4	-	187844932	187844925	187844949	Lmna	rna11635	gene6581	protein_coding	i	202.568	275.949	246.356	197.523	224.77	306.899	180.077	274.201	238.543	0.094248	0.307671	0.306327	0.759356	0.999991
1308	NC_005103.4	-	107880882	107880873	107880905	Ctnna2	rna20942	gene11959	protein_coding	c	125.116	320.933	177.639	219.07	211.11	306.234	197.789	306.46	233.044	0.272627	0.369187	0.738453	0.460239	0.999991
1309	NC_005100.4	-	174360529	174360515	174360552	Tmem9b	rna5374	gene3121	protein_coding	o	204.554	222.236	195.184	257.378	279.41	268.37	237.15	314.909	247.399	0.323049	0.272192	1.18684	0.23529	0.999991
1310	NC_005106.4	+	110179473	110179456	110179683	Khdrbs3	rna33016	gene18673	protein_coding	o	135.046	250.435	154.977	270.546	189.999	301.584	293.239	315.677	238.938	0.437984	0.351085	1.24752	0.212209	0.999991
1311	NC_005114.4	+	44804566	44804546	44804928	Nefl	rna56892	gene31177	protein_coding	p	83.4105	321.604	328.231	219.07	162.679	315.534	143.668	222.74	224.617	-0.177793	0.451213	-0.394033	0.693556	0.999991
1312	NC_005104.4	+	57039244	57039215	57039603	Dnaja1	rna23870	gene13542	protein_coding	o	248.246	253.121	203.225	250.195	214.835	377.313	281.431	135.948	245.539	0.0823453	0.363007	0.226842	0.820547	0.999991
1313	NC_005111.4	+	9686408	9686396	9686783	-	-	-	-	u	369.389	252.449	255.128	379.483	222.286	185.335	261.751	182.801	263.578	-0.557495	0.306314	-1.82001	0.0687569	0.999991
1314	NC_005117.4	-	15995003	15994994	15995014	Ino80c	rna62434	gene34261	protein_coding	o	276.049	229.621	209.804	252.589	258.299	248.442	250.926	286.49	251.528	0.113715	0.262825	0.432662	0.66526	0.999991
1315	NC_005106.4	+	72968100	72968087	72968297	Laptm4b	rna32494	gene18367	protein_coding	o	133.06	317.576	223.694	219.07	214.835	257.742	261.751	254.999	235.341	0.139889	0.332444	0.420789	0.673909	0.999991
1316	NC_005101.4	+	252854749	252854726	252855079	Ttll7	rna13500	gene7613	protein_coding	o	162.849	277.963	160.095	221.465	191.241	323.506	190.901	345.631	234.206	0.353248	0.356898	0.989772	0.322286	0.999991
1317	NC_005106.4	+	108610926	108610917	108611301	-	-	-	-	u	585.859	235.664	285.1	237.027	196.208	112.264	238.134	292.635	272.861	-0.674402	0.4233	-1.5932	0.111116	0.999991
1318	NC_005101.4	-	195738614	195738609	195738634	Snx27	rna12053	gene6813	protein_coding	c	154.905	255.806	240.507	232.239	146.535	332.806	307.016	208.147	234.745	0.168284	0.358831	0.468978	0.639085	0.999991
1319	NC_005103.4	+	145587838	145587829	145588130	Vhl	rna21765	gene12386	protein_coding	o	272.077	226.264	217.115	289.7	233.463	208.585	295.207	281.882	253.037	0.0229838	0.284532	0.0807777	0.935619	0.999991
1320	NC_005106.4	-	23543123	23543117	23543150	Timp3	rna31545	gene17852	protein_coding	o	176.751	194.708	236.121	250.195	134.117	356.72	332.6	221.204	237.802	0.284846	0.37094	0.767903	0.442545	0.999991
1321	NC_005109.4	-	90107028	90106959	90107035	Lsm12	rna45787	gene25099	protein_coding	c	369.389	217.536	293.872	210.691	286.861	271.692	133.827	242.71	253.322	-0.219374	0.357216	-0.614121	0.539136	0.999991
1322	NC_005119.4	-	14593084	14593068	14593100	Gnaz	rna66850	gene36766	protein_coding	c	313.782	241.035	198.839	269.349	330.325	241.799	238.134	225.812	257.384	0.0214387	0.298176	0.0718997	0.942682	0.999991
1323	NC_005100.4	+	154458425	154458387	154458630	Picalm	rna4579	gene2602	protein_coding	c	154.905	253.792	211.997	283.714	153.986	313.541	284.383	238.87	236.899	0.130016	0.346649	0.375065	0.707612	0.999991
1324	NC_005109.4	-	88373051	88373037	88373075	-	-	-	-	u	59.5789	277.963	167.405	252.589	88.1694	413.848	216.485	291.866	220.988	0.412534	0.525645	0.784815	0.432562	0.999991
1325	NC_005113.4	+	17565949	17565935	17566146	Cdkl2	rna53651	gene29301	protein_coding	o	299.881	204.779	273.404	250.195	248.364	239.806	222.39	269.592	251.051	-0.0649293	0.274281	-0.236725	0.81287	0.999991
1326	NC_005113.4	-	42761450	42761396	42761463	Limch1	rna54142	gene29574	protein_coding	c	367.403	220.222	239.045	191.537	288.103	248.442	205.661	278.041	254.807	0.0089173	0.319456	0.027914	0.977731	0.999991
1327	NC_005100.4	+	80984220	80984202	80984461	LOC102551479	gene1359	gene1359	pseudogene	p	222.428	208.808	244.894	258.575	213.593	285.642	282.415	238.102	244.307	0.126914	0.272212	0.466232	0.641049	0.999991
1328	NC_005111.4	+	39603209	39603128	39603490	Atp2a2	rna50170	gene27481	protein_coding	o	204.554	255.135	279.983	265.758	187.515	309.556	251.91	162.831	239.655	-0.142367	0.320427	-0.444304	0.656822	0.999991
1329	NC_005104.4	-	139885322	139885303	139885335	Smap2	rna25694	gene14542	protein_coding	o	137.032	223.579	209.073	248.998	188.757	309.556	226.326	329.502	234.103	0.362015	0.333745	1.0847	0.278053	0.999991
1330	NC_005100.4	+	218540524	218540502	218540674	Mrpl21	rna6953	gene3870	protein_coding	o	393.221	248.421	197.377	262.166	409.801	180.685	218.454	222.74	266.608	-0.0919103	0.37389	-0.245822	0.80582	0.999991
1331	NC_005109.4	-	103967355	103967335	103967372	Atp5h	rna46362	gene25354	protein_coding	c	200.582	271.249	213.459	172.383	217.319	249.77	125.955	421.67	234.049	0.242145	0.397242	0.609566	0.54215	0.999991
1332	NC_005103.4	+	118795770	118795746	118796049	Aak1	rna21248	gene12117	protein_coding	o	139.017	290.72	228.811	226.253	150.261	297.599	346.377	185.873	233.114	0.143396	0.381151	0.376218	0.706755	0.999991
1333	NC_005117.4	-	6766007	6765996	6766048	Aqp4	rna62344	gene34199	protein_coding	o	83.4105	320.261	136.702	138.864	156.47	484.262	181.061	235.797	217.103	0.633863	0.490288	1.29284	0.196067	0.999991
1334	NC_005100.4	-	221504171	221504129	221504177	Arl2	rna7298	gene4038	protein_coding	o	395.207	184.637	385.982	205.902	193.724	233.828	199.757	216.596	251.954	-0.469322	0.351829	-1.33395	0.182221	0.999991
1335	NC_005103.4	+	114896576	114896555	114896821	Dctn1	rna21049	gene12025	protein_coding	o	160.863	255.806	249.28	187.946	242.155	256.413	208.613	317.213	234.786	0.256862	0.307183	0.836184	0.403052	0.999991
1336	NC_005109.4	+	79495288	79495284	79495450	-	-	-	-	u	232.358	289.377	445.195	252.589	332.808	233.828	136.779	29.9547	244.111	-0.737188	0.555618	-1.32679	0.184579	0.999991
1337	NC_005107.4	-	22250836	22250827	22250858	Keap1	rna35187	gene19791	protein_coding	c	176.751	296.762	216.384	193.931	301.763	296.27	173.188	238.87	236.74	0.187494	0.32793	0.57175	0.567491	0.999991
1338	NC_005119.4	+	12101025	12101010	12101257	Adarb1	rna66694	gene36700	protein_coding	o	119.158	257.821	330.424	259.772	134.117	219.878	268.639	260.376	231.273	-0.135885	0.388981	-0.349337	0.726836	0.999991
1339	NC_005107.4	+	116306874	116306859	116306973	Zmynd10	rna37892	gene21181	protein_coding	o	335.628	174.566	228.811	187.946	391.174	184.671	261.751	308.764	259.164	0.310568	0.359225	0.864551	0.387285	0.999991
1340	NC_005109.4	+	90350354	90350341	90350652	Rundc3a	rna45811	gene25110	protein_coding	e	256.189	284.005	243.432	195.128	327.841	273.684	174.172	198.162	244.077	-0.00923871	0.323212	-0.0285841	0.977196	0.999991
1341	NC_005112.4	-	29896769	29896768	29896775	-	-	-	-	u	49.6491	277.291	246.356	324.416	189.999	485.591	173.188	40.7077	223.4	-0.0154548	0.639881	-0.0241527	0.980731	0.999991
1342	NC_005105.4	+	11724998	11724920	11725131	Fbxo11	rna27678	gene15448	protein_coding	i	200.582	260.506	161.557	244.21	185.032	265.713	292.255	303.388	239.155	0.272454	0.315189	0.864414	0.387361	0.999991
1343	NC_005106.4	+	123183339	123183304	123183591	Csdc2	rna33715	gene18961	protein_coding	o	224.414	269.906	170.329	195.128	309.214	346.091	148.588	248.087	238.97	0.291518	0.353179	0.82541	0.409139	0.999991
1344	NC_005111.4	-	12322251	12322236	12322276	Bri3	rna49198	gene26958	protein_coding	o	196.61	212.836	247.087	280.123	263.266	354.063	252.894	126.731	241.701	0.0889752	0.365153	0.243665	0.80749	0.999991
1345	NC_005116.4	+	9816151	9816111	9816309	Lman2	rna60270	gene32999	protein_coding	p	287.965	228.95	263.169	252.589	208.626	241.799	275.527	217.364	246.999	-0.127336	0.268416	-0.4744	0.635215	0.999991
1346	NC_005100.4	-	279946809	279946797	279946822	Hspa12a	rna9008	gene4932	protein_coding	o	131.074	221.565	337.003	342.372	121.699	263.056	324.728	142.093	235.449	-0.279638	0.435734	-0.641763	0.521027	0.999991
1347	NC_005117.4	-	34685200	34685197	34685200	-	-	-	-	u	142.989	314.89	275.597	264.56	202.417	385.284	131.859	103.689	227.661	-0.279983	0.452509	-0.618734	0.536091	0.999991
1348	NC_005118.4	-	55387054	55387037	55387080	Aprt	rna65519	gene35950	protein_coding	p	264.133	190.68	269.017	244.21	228.495	239.142	188.933	324.893	243.688	0.0233343	0.30523	0.0764481	0.939063	0.999991
1349	NC_005102.4	+	171869660	171869645	171869886	Vapb	rna18658	gene10555	protein_coding	c	252.217	224.922	236.121	217.873	330.325	247.777	203.693	256.535	246.183	0.157115	0.283229	0.554729	0.57908	0.999991
1350	NC_005100.4	-	255662545	255662524	255662560	Cpeb3	rna8269	gene4584	protein_coding	c	270.091	162.481	131.585	271.743	347.71	348.084	237.15	243.478	251.54	0.500093	0.35514	1.40816	0.159084	0.999991
1351	NC_005108.4	-	61595220	61595211	61595256	Sf3b1	rna40197	gene22292	protein_coding	c	162.849	246.407	203.225	232.239	168.888	335.463	250.926	252.695	231.586	0.253548	0.324059	0.782411	0.433973	0.999991
1352	NC_005115.4	+	68927484	68927473	68927719	RGD1562020	gene32538	gene32538	pseudogene	o	43.6912	230.964	209.804	338.781	254.574	218.549	339.489	251.927	235.972	0.365325	0.488495	0.747858	0.454546	0.999991
1353	NC_005105.4	+	94490414	94490390	94490628	LOC108351251	rna29006	gene16227	lncRNA	x	184.695	239.021	293.872	263.363	266.992	180.685	271.591	235.797	242.002	-0.044974	0.301461	-0.149187	0.881406	0.999991
1354	NC_005101.4	+	154596698	154596676	154597015	-	-	-	-	u	260.161	237.007	254.397	319.627	202.417	198.621	266.671	236.565	246.933	-0.243289	0.278088	-0.874862	0.381649	0.999991
1355	NC_005113.4	-	20476259	20476240	20476277	Slc4a4	rna53735	gene29339	protein_coding	o	218.456	227.607	180.563	239.421	309.214	257.077	273.559	252.695	244.824	0.33523	0.268089	1.25044	0.211139	0.999991
1356	NC_005116.4	-	21571511	21571495	21571545	Tmem14c	rna60686	gene33219	protein_coding	o	210.512	229.621	222.963	226.253	162.679	296.27	276.511	260.376	235.648	0.164732	0.300519	0.54816	0.583582	0.999991
1357	NC_005118.4	+	50000395	50000391	50000695	Cmip	rna65346	gene35863	protein_coding	o	268.105	220.222	248.549	205.902	180.064	233.828	329.648	254.231	242.569	0.084623	0.30414	0.278237	0.78083	0.999991
1358	NC_005116.4	-	68593630	68593614	68593642	LOC100360669	gene33866	gene33866	pseudogene	o	220.442	190.68	192.26	298.079	199.933	271.692	271.591	294.171	242.356	0.206687	0.30312	0.681865	0.495324	0.999991
1359	NC_005101.4	-	211184853	211184837	211184857	Celsr2	rna12769	gene7187	protein_coding	c	291.937	260.506	206.88	186.749	378.756	226.52	179.093	254.231	248.084	0.135088	0.339999	0.397319	0.691132	0.999991
1360	NC_005110.4	+	83097890	83097872	83098155	RGD1562339	rna48427	gene26536	protein_coding	c	160.863	242.378	270.479	258.575	204.901	236.485	281.431	228.117	235.404	0.0231035	0.299249	0.0772049	0.938461	0.999991
1361	NC_005101.4	-	123162476	123162472	123162493	Anxa5	rna10666	gene5994	protein_coding	c	413.081	259.163	264.631	84.9945	151.502	208.585	160.396	388.643	241.375	-0.16428	0.482668	-0.340358	0.733587	0.999991
1362	NC_005108.4	+	100840505	100840492	100840784	Bok	rna41422	gene22815	protein_coding	o	258.175	216.865	155.708	156.821	422.22	292.949	183.029	281.882	245.956	0.586366	0.356161	1.64635	0.0996911	0.999991
1363	NC_005115.4	+	17513772	17513761	17514010	RGD1309676	rna58397	gene31979	protein_coding	o	240.302	279.306	229.542	204.705	253.332	256.413	218.454	225.812	238.483	-0.00131519	0.268413	-0.00489987	0.99609	0.999991
1364	NC_005106.4	+	54210855	54210842	54211003	-	-	-	-	u	208.526	300.119	274.135	239.421	209.868	201.942	123.987	306.46	233.057	-0.281315	0.348137	-0.80806	0.419056	0.999991
1365	NC_005107.4	-	40015533	40015454	40015552	Nrgn	rna35613	gene19995	protein_coding	c	262.147	204.108	290.217	228.647	230.979	300.256	197.789	200.466	239.326	-0.081693	0.297627	-0.274481	0.783715	0.999991
1366	NC_005101.4	+	197759872	197759831	197760023	Ensa	rna12184	gene6864	protein_coding	o	204.554	305.491	166.674	274.137	146.535	295.606	253.878	220.436	233.414	-0.0523009	0.349279	-0.14974	0.88097	0.999991
1367	NC_005109.4	+	13780563	13780534	13780693	Abca3	rna42289	gene23285	protein_coding	o	337.614	257.149	206.149	190.34	357.645	199.285	223.374	241.174	251.591	0.0454197	0.335934	0.135204	0.89245	0.999991
1368	NC_005106.4	-	117145104	117145084	117145115	Nrbp2	rna33219	gene18762	protein_coding	o	353.502	174.566	211.997	328.007	331.567	150.128	277.495	264.984	261.531	-0.0573121	0.373796	-0.153324	0.878142	0.999991
1369	NC_005102.4	+	177047795	177047769	177048047	Dnajc5	rna18894	gene10668	protein_coding	o	297.895	183.966	222.232	238.224	377.514	223.199	275.527	209.683	253.53	0.207113	0.324923	0.637422	0.52385	0.999991
1370	NC_005101.4	+	242185936	242185925	242186089	Ppp3ca	rna13262	gene7486	protein_coding	c	73.4807	260.506	362.589	238.224	90.653	187.328	296.192	262.68	221.456	-0.164024	0.494078	-0.33198	0.739905	0.999991
1371	NC_005105.4	-	11511778	11511739	11511788	-	-	-	-	u	152.919	256.478	435.691	244.21	182.548	338.784	147.604	39.1716	224.676	-0.62328	0.543519	-1.14675	0.251485	0.999991
1372	NC_005102.4	+	150918524	150918469	150918760	Tp53inp2	rna17823	gene10162	protein_coding	o	349.53	197.394	173.984	193.931	286.861	278.999	196.805	303.388	247.611	0.22941	0.339242	0.676242	0.498887	0.999991
1373	NC_005103.4	-	60080538	60080525	60080546	Chchd3	rna19924	gene11289	protein_coding	o	242.288	233.65	253.666	211.888	168.888	239.142	313.904	233.493	237.115	0.0222274	0.300314	0.0740139	0.940999	0.999991
1374	NC_005118.4	+	54613471	54613457	54613832	Jph3	rna65467	gene35929	protein_coding	o	283.993	234.993	214.191	229.844	276.926	211.242	243.054	265.752	244.999	0.0529023	0.27172	0.194694	0.845633	0.999991
1375	NC_005118.4	-	24958957	24958953	24958958	-	-	-	-	u	248.246	206.122	255.128	229.844	255.815	170.056	227.31	342.559	241.885	0.0847838	0.315976	0.268323	0.78845	0.999991
1376	NC_005118.4	+	46693839	46693818	46694210	Vat1l	rna65297	gene35834	protein_coding	o	186.681	234.321	160.095	251.392	212.352	254.42	310.952	281.882	236.512	0.34814	0.30064	1.158	0.246865	0.999991
1377	NC_005119.4	+	7140158	7140106	7140477	Hmga1	rna66454	gene36581	protein_coding	o	190.653	203.437	213.459	196.325	213.593	322.841	147.604	341.791	228.713	0.353037	0.344743	1.02406	0.305808	0.999991
1378	NC_005104.4	-	169155242	169155232	169155265	Thap3	rna27009	gene15173	protein_coding	c	226.4	202.094	201.032	209.494	153.986	290.292	233.214	341.791	232.288	0.285454	0.327397	0.87189	0.383268	0.999991
1379	NC_005117.4	-	29585806	29585789	29585819	Ndufa2	rna62760	gene34420	protein_coding	c	129.088	177.252	313.61	256.181	152.744	403.884	207.629	149.006	223.674	0.058331	0.431907	0.135055	0.892569	0.999991
1380	NC_005120.4	-	142053659	142053643	142053666	Fgf13	rna69708	gene38689	protein_coding	c	194.624	293.405	175.446	271.743	163.921	284.977	211.565	251.927	230.951	-0.0351469	0.329011	-0.106826	0.914927	0.999991
1381	NC_005106.4	+	145146483	145146470	145146626	Pde1b	rna34729	gene19436	protein_coding	c	240.302	239.693	262.438	286.108	280.652	215.892	241.086	178.96	243.141	-0.169198	0.282545	-0.598835	0.549283	0.999991
1382	NC_005116.4	+	23764376	23764354	23764529	-	-	-	-	u	182.709	220.893	223.694	247.801	181.306	323.506	228.294	235.029	230.404	0.145988	0.303994	0.480233	0.631062	0.999991
1383	NC_005102.4	-	51530895	51530891	51530904	Scn3a	rna15187	gene8512	protein_coding	c	268.105	208.808	200.301	217.873	358.887	172.713	279.463	282.65	248.6	0.290375	0.321929	0.901983	0.367066	0.999991
1384	NC_005107.4	-	85388329	85388320	85388370	Fbxo9	rna37188	gene20828	protein_coding	o	178.737	237.007	231.735	246.604	127.908	282.32	277.495	249.623	228.929	0.067976	0.340722	0.199506	0.841867	0.999991
1385	NC_005107.4	-	116873726	116873711	116873738	Bsn	rna37965	gene21214	protein_coding	o	170.793	220.893	252.935	253.787	124.182	263.056	226.326	307.996	227.496	0.0366857	0.354636	0.103446	0.917609	0.999991
1386	NC_005100.4	+	86971954	86971930	86972232	Sirt2	rna2535	gene1577	protein_coding	o	240.302	200.751	297.527	222.662	265.75	253.092	175.156	240.406	236.956	-0.0413152	0.296637	-0.139279	0.88923	0.999991
1387	NC_005109.4	-	13087930	13087906	13087942	Flywch1	rna42229	gene23259	protein_coding	o	81.4245	300.791	182.025	175.975	129.15	388.605	136.779	296.475	211.403	0.357504	0.480136	0.744588	0.456521	0.999991
1388	NC_005109.4	+	63772055	63772029	63772220	Pitpna	rna44432	gene24408	protein_coding	o	282.007	179.266	166.674	292.094	222.286	257.077	243.054	308.764	243.903	0.172251	0.32138	0.535974	0.591976	0.999991
1389	NC_005110.4	-	42567839	42567833	42567854	Epha6	rna47480	gene25998	protein_coding	i	103.27	306.162	256.59	318.43	127.908	142.821	342.441	231.957	228.697	-0.224558	0.446037	-0.503451	0.614647	0.999991
1390	NC_005107.4	-	116862662	116862656	116862670	Apeh	rna37964	gene21213	protein_coding	o	264.133	300.791	144.743	189.143	259.541	196.628	186.965	353.312	236.907	0.15043	0.365169	0.411945	0.68038	0.999991
1391	NC_005102.4	+	132289583	132289551	132289715	-	-	-	-	u	442.87	84.5974	196.646	257.378	804.701	237.813	192.869	42.2438	282.39	0.382292	0.677454	0.564307	0.572545	0.999991
1392	NC_005107.4	+	13004470	13004453	13004749	Cwc15	rna34913	gene19582	protein_coding	c	250.231	226.936	172.522	237.027	347.71	215.892	234.198	264.984	243.688	0.262621	0.30182	0.870124	0.384233	0.999991
1393	NC_005112.4	+	49730280	49730255	49730537	Lrrn2	rna51254	gene28054	protein_coding	o	150.933	232.307	200.301	246.604	170.13	262.392	258.799	298.779	227.531	0.251917	0.318797	0.790209	0.429406	0.999991
1394	NC_005102.4	+	114093313	114093293	114093451	B2m	rna16767	gene9577	protein_coding	o	131.074	249.764	152.784	256.181	213.593	319.52	260.767	235.029	227.339	0.378175	0.340552	1.11048	0.266793	0.999991
1395	NC_005116.4	+	89238014	89237872	89238310	-	-	-	-	u	73.4807	219.55	198.839	244.21	114.248	322.841	221.406	339.487	216.758	0.435528	0.453423	0.960534	0.336787	0.999991
1396	NC_005105.4	-	94951536	94951511	94951561	Rtn1	rna29017	gene16235	protein_coding	c	200.582	138.981	313.61	164.004	145.293	251.099	339.489	284.186	229.655	0.320056	0.387735	0.825451	0.409116	0.999991
1397	NC_005106.4	-	124958544	124958537	124958561	Sult4a1	rna33832	gene19013	protein_coding	o	127.102	232.978	312.148	257.378	116.731	237.813	320.792	194.322	224.908	-0.0998703	0.403988	-0.247211	0.804745	0.999991
1398	NC_005100.4	+	206062723	206062710	206063138	Adam12	rna6367	gene3600	protein_coding	i	125.116	235.664	150.591	424.973	392.416	149.464	418.211	105.226	250.207	0.182978	0.522806	0.349992	0.726345	0.999991
1399	NC_005114.4	+	42665863	42665842	42666330	Clu	rna56817	gene31146	protein_coding	o	137.032	339.061	117.695	196.325	111.764	363.363	185.981	271.129	215.294	0.237481	0.458383	0.518084	0.6044	0.999991
1400	NC_005102.4	-	120003214	120003207	120003252	Fahd2a	rna16927	gene9664	protein_coding	o	206.54	198.737	219.308	199.917	211.11	301.584	167.284	320.285	228.096	0.281127	0.316665	0.887774	0.374663	0.999991
1401	NC_005105.4	+	9975780	9975765	9975885	-	-	-	-	u	248.246	238.35	241.238	186.749	127.908	370.005	164.332	215.828	224.082	-0.0547663	0.380521	-0.143925	0.88556	0.999991
1402	NC_005109.4	-	13112263	13112212	13112271	Flywch2	rna42235	gene23260	protein_coding	c	278.035	247.078	241.238	210.691	228.495	263.72	176.14	230.421	234.477	-0.117235	0.281336	-0.41671	0.676891	0.999991
1403	NC_005100.4	-	259374505	259374494	259374512	Sorbs1	rna8363	gene4641	protein_coding	c	236.33	251.106	179.101	258.575	175.097	255.749	241.086	267.288	233.042	0.0255107	0.296188	0.0861302	0.931363	0.999991
1404	NC_005114.4	-	28710299	28710283	28710326	Mettl3	rna56318	gene30683	protein_coding	o	305.838	147.038	189.336	278.926	337.776	226.52	192.869	306.46	248.095	0.213322	0.356964	0.597599	0.550107	0.999991
1405	NC_005100.4	-	225309740	225309723	225309749	Asrgl1	rna7558	gene4144	protein_coding	o	188.667	232.307	217.846	210.691	193.724	267.042	153.508	337.951	225.217	0.16488	0.334623	0.492732	0.622202	0.999991
1406	NC_005103.4	+	56747656	56747643	56747710	Atp6v1f	rna19818	gene11224	protein_coding	o	234.344	245.735	331.155	222.662	175.097	271.692	157.444	180.496	227.328	-0.397845	0.317405	-1.25343	0.210049	0.999991
1407	NC_005102.4	-	95405490	95405478	95405516	Rcn1	rna16257	gene9283	protein_coding	c	319.74	202.765	138.164	262.166	476.86	206.592	184.997	241.174	254.057	0.26885	0.411304	0.653653	0.513335	0.999991
1408	NC_005107.4	-	88880985	88880981	88880991	-	-	-	-	u	184.695	250.435	319.458	275.334	245.881	128.871	219.438	245.782	233.737	-0.300169	0.338241	-0.887439	0.374842	0.999991
1409	NC_005100.4	-	220874400	220874392	220874410	Snx32	rna7211	gene3998	protein_coding	c	287.965	200.08	193.722	186.749	274.443	277.67	205.661	272.665	237.369	0.253685	0.295243	0.859242	0.390207	0.999991
1410	NC_005109.4	+	13962011	13961993	13962184	Pkd1	rna42335	gene23298	protein_coding	o	266.119	219.55	258.052	263.363	306.73	211.242	197.789	204.307	240.894	-0.13124	0.289355	-0.453561	0.650145	0.999991
1411	NC_005112.4	+	110470876	110470855	110471079	Lpgat1	rna53000	gene28944	protein_coding	o	166.821	257.149	214.922	186.749	165.162	245.785	219.438	324.893	222.615	0.207883	0.326952	0.635822	0.524893	0.999991
1412	NC_005109.4	+	13147669	13147661	13147946	Srrm2	rna42243	gene23261	protein_coding	e	363.431	205.451	277.79	207.099	91.8949	178.028	242.07	334.11	237.484	-0.311325	0.419261	-0.742556	0.45775	0.999991
1413	NC_005111.4	-	25595809	25595783	25595891	Gatsl2	rna49859	gene27316	protein_coding	o	285.979	197.394	177.639	243.013	290.586	210.578	315.872	236.565	244.703	0.225689	0.306494	0.736356	0.461514	0.999991
1414	NC_005120.4	-	40300412	40300398	40300427	Mbtps2	rna68328	gene37662	protein_coding	i	85.3965	231.636	178.37	312.445	279.41	210.578	222.39	309.532	228.72	0.333481	0.401139	0.831336	0.405784	0.999991
1415	NC_005117.4	-	23700012	23699994	23700018	Rit2	rna62509	gene34312	protein_coding	o	232.358	157.109	228.811	244.21	266.992	278.334	277.495	214.291	237.45	0.269194	0.291285	0.924159	0.355404	0.999991
1416	NC_005109.4	+	56387577	56387545	56387890	Zbtb4	rna43918	gene24140	protein_coding	c	377.333	153.081	349.43	280.123	315.423	195.963	201.725	136.716	251.224	-0.448164	0.392429	-1.14203	0.253443	0.999991
1417	NC_005109.4	+	85653668	85653647	85653918	Psmb3	rna45366	gene24881	protein_coding	o	190.653	208.808	203.956	232.239	137.842	353.398	201.725	255.767	223.049	0.185935	0.350098	0.531093	0.595354	0.999991
1418	NC_005101.4	-	77585759	77585718	77585775	Basp1	rna10084	gene5636	protein_coding	p	89.3684	300.791	171.06	140.061	135.359	403.884	135.795	277.273	206.699	0.437085	0.477469	0.91542	0.359971	0.999991
1419	NC_005117.4	+	29120157	29120132	29120313	Igip	rna62731	gene34405	protein_coding	c	186.681	209.479	331.155	150.835	281.894	271.027	200.741	178.96	226.347	0.0816579	0.352203	0.231849	0.816655	0.999991
1420	NC_005102.4	+	11252390	11252358	11252740	Prrc2b	rna14434	gene8032	protein_coding	o	210.512	187.323	169.598	272.94	249.606	288.299	285.367	219.668	235.414	0.314812	0.29518	1.06651	0.286192	0.999991
1421	NC_005109.4	-	88669204	88669189	88669216	Hcrt	rna45643	gene25032	protein_coding	o	89.3684	306.833	188.605	225.056	192.482	282.32	193.853	251.927	216.306	0.178389	0.393696	0.453114	0.650466	0.999991
1422	NC_005114.4	+	106292739	106292719	106292911	Ipo5	rna57755	gene31669	protein_coding	c	156.891	241.035	163.75	179.566	219.803	342.77	202.709	261.912	221.054	0.468511	0.318561	1.47071	0.141369	0.999991
1423	NC_005113.4	-	10441019	10440980	10441029	Mrps18c	rna53469	gene29194	protein_coding	c	341.586	213.508	194.453	257.378	378.756	174.706	247.974	200.466	251.103	-0.0050232	0.358391	-0.014016	0.988817	0.999991
1424	NC_005119.4	-	8500014	8500005	8500037	LOC288777	gene36620	gene36620	pseudogene	c	228.386	239.693	146.205	129.287	117.973	371.334	91.5143	403.237	215.954	0.40794	0.499077	0.817388	0.413707	0.999991
1425	NC_005120.4	+	119156731	119156708	119157097	-	-	-	-	u	486.561	190.68	207.611	336.387	300.521	126.214	219.438	231.189	262.325	-0.47338	0.410395	-1.15347	0.248716	0.999991
1426	NC_005100.4	-	275843831	275843818	275843850	Gpam	rna8871	gene4872	protein_coding	c	178.737	243.05	201.763	280.123	176.339	241.799	238.134	261.144	227.636	0.0210109	0.299452	0.0701646	0.944063	0.999991
1427	NC_005115.4	-	81839692	81839676	81839713	Mcf2l	rna59801	gene32751	protein_coding	o	260.161	165.166	233.928	198.72	244.639	191.978	172.204	404.005	233.85	0.243238	0.364233	0.66781	0.504255	0.999991
1428	NC_005107.4	+	114350691	114350660	114350853	Pik3r4	rna37791	gene21129	protein_coding	o	180.723	178.594	176.177	216.676	266.992	237.149	265.687	328.734	231.341	0.547333	0.274307	1.99533	0.0460069	0.999991
1429	NC_005104.4	+	173252778	173252757	173253025	Mrpl20	rna27244	gene15260	protein_coding	o	85.3965	302.133	150.591	173.58	181.306	320.184	159.412	317.213	211.227	0.452891	0.433252	1.04533	0.29587	0.999991
1430	NC_005107.4	+	22675666	22675652	22675900	Smarca4	rna35228	gene19806	protein_coding	e	321.726	335.704	211.997	107.74	250.848	234.492	107.259	261.144	228.864	-0.193589	0.434166	-0.445887	0.655679	0.999991
1431	NC_005109.4	-	88622174	88622173	88622216	Rab5c	rna45638	gene25029	protein_coding	c	135.046	205.451	354.547	281.32	212.352	258.406	198.773	145.933	223.978	-0.264776	0.373746	-0.708437	0.478674	0.999991
1432	NC_005103.4	+	179503762	179503753	179503910	Kras	rna23000	gene13003	protein_coding	i	107.242	300.791	220.77	235.83	237.188	298.927	147.604	194.322	217.834	0.0161294	0.388691	0.0414965	0.9669	0.999991
1433	NC_005101.4	+	26471715	26471692	26471860	Ndufs6	rna9396	gene5189	protein_coding	p	174.765	267.22	240.507	167.595	217.319	273.684	128.907	284.186	219.273	0.0860005	0.356186	0.241448	0.809208	0.999991
1434	NC_005108.4	-	42899452	42899415	42899487	Kansl3	rna39801	gene22097	protein_coding	o	135.046	183.294	223.694	245.407	188.757	275.677	225.342	303.388	222.576	0.332219	0.323613	1.02659	0.304612	0.999991
1435	NC_005103.4	+	157733648	157733617	157734000	Vamp1	rna22287	gene12623	protein_coding	o	180.723	218.208	263.169	251.392	197.45	235.156	230.262	237.334	226.712	-0.0242288	0.277074	-0.0874453	0.930318	0.999991
1436	NC_005103.4	-	161678851	161678829	161678855	Rhno1	rna22417	gene12705	lncRNA	p	530.252	213.508	411.567	193.931	275.685	244.456	108.243	23.8102	250.182	-1.0484	0.597926	-1.7534	0.0795338	0.999991
1437	NC_005112.4	+	83984529	83984498	83984870	Creg1	rna52140	gene28474	protein_coding	o	248.246	214.85	146.205	289.7	295.554	221.206	279.463	224.276	239.938	0.185646	0.320784	0.578724	0.562775	0.999991
1438	NC_005101.4	-	188394116	188394109	188394155	Rusc1	rna11694	gene6600	protein_coding	c	202.568	230.964	198.839	233.436	209.868	284.977	211.565	236.565	226.098	0.124194	0.273527	0.454048	0.649795	0.999991
1439	NC_005104.4	-	169021526	169021516	169021551	LOC100362830	rna27006	gene15171	protein_coding	c	27.8035	343.761	157.171	222.662	91.8949	464.334	155.476	135.18	199.785	0.169505	0.633327	0.267643	0.788974	0.999991
1440	NC_005101.4	+	95040328	95040308	95040586	Tpd52	rna10262	gene5769	protein_coding	c	144.975	301.462	236.852	251.392	130.391	220.542	219.438	241.174	218.278	-0.2073	0.348377	-0.595043	0.551815	0.999991
1441	NC_005109.4	-	40790854	40790843	40790877	Atox1	rna43237	gene23769	protein_coding	c	97.3122	296.762	147.667	138.864	111.764	362.034	121.035	355.616	203.882	0.478586	0.497984	0.961046	0.336529	0.999991
1442	NC_005107.4	-	120358439	120358378	120358448	Arpp21	rna38262	gene21327	protein_coding	i	125.116	253.121	186.412	205.902	213.593	328.156	137.763	272.665	215.341	0.301589	0.37297	0.808615	0.418737	0.999991
1443	NC_005104.4	+	146931448	146931414	146931753	Phc2	rna25947	gene14671	protein_coding	o	160.863	208.136	130.854	233.436	257.057	317.527	173.188	307.996	223.632	0.526668	0.340332	1.54751	0.121739	0.999991
1444	NC_005100.4	+	20116729	20116678	20117197	Samd3	rna309	gene211	protein_coding	i	93.3403	253.121	181.294	390.257	95.6203	275.013	221.406	238.87	218.615	-0.144646	0.469039	-0.308388	0.757787	0.999991
1445	NC_005116.4	+	75658618	75658601	75658871	Celf2	rna61849	gene33930	protein_coding	c	254.203	228.279	253.666	185.551	196.208	207.256	241.086	260.376	228.328	-0.0249569	0.280192	-0.0890709	0.929026	0.999991
1446	NC_005119.4	+	45488348	45488336	45488807	Cdk19	rna67401	gene37103	protein_coding	i	29.7895	278.634	222.232	231.042	129.15	326.163	296.192	153.614	208.352	0.24364	0.553411	0.440252	0.659755	0.999991
1447	NC_005101.4	-	244258549	244258541	244258565	Rap1gds1	rna13336	gene7533	protein_coding	o	101.284	243.05	203.956	243.013	111.764	294.942	282.415	235.797	214.528	0.22158	0.410383	0.539933	0.589243	0.999991
1448	NC_005107.4	+	132663509	132663480	132663744	Sacm1l	rna38728	gene21526	protein_coding	o	97.3122	225.593	241.969	302.868	62.0911	274.349	283.399	231.957	214.942	-0.0282132	0.489221	-0.0576697	0.954012	0.999991
1449	NC_005109.4	-	29342498	29342491	29342514	Ttc1	rna42808	gene23529	protein_coding	c	135.046	223.579	231.004	197.523	170.13	302.913	214.517	251.927	215.83	0.251039	0.327026	0.767644	0.442699	0.999991
1450	NC_005101.4	-	231224641	231224634	231224706	Ank2	rna13066	gene7365	protein_coding	o	162.849	269.906	174.715	211.888	189.999	241.135	222.39	289.562	220.305	0.199878	0.310655	0.643407	0.51996	0.999991
1451	NC_005118.4	-	21400737	21400726	21400769	Lonp2	rna64318	gene35349	protein_coding	o	129.088	202.094	233.928	264.56	124.182	256.413	314.888	234.261	219.927	0.161843	0.378849	0.427197	0.669236	0.999991
1452	NC_005101.4	+	235760355	235760318	235760602	Etnppl	rna13134	gene7416	protein_coding	o	216.47	173.895	225.887	215.479	254.574	204.599	276.511	281.114	231.066	0.290857	0.278063	1.04601	0.295555	0.999991
1453	NC_005102.4	+	11431385	11431366	11431433	Ptges2	rna14472	gene8043	protein_coding	o	268.105	209.479	297.527	240.618	279.41	213.235	153.508	199.698	232.698	-0.26488	0.309041	-0.857102	0.391389	0.999991
1454	NC_005109.4	-	16693854	16693826	16693870	Crebrf	rna42623	gene23426	protein_coding	o	188.667	196.722	185.681	233.436	285.619	244.456	218.454	272.665	228.212	0.343559	0.270939	1.26803	0.204786	0.999991
1455	NC_005108.4	+	81568523	81568501	81568675	Pnkd	rna40673	gene22500	protein_coding	o	301.867	201.422	220.039	195.128	317.907	217.22	197.789	237.334	236.088	0.0827574	0.309428	0.267453	0.78912	0.999991
1456	NC_005114.4	+	4893895	4893856	4894033	RGD1304704	rna55716	gene30332	protein_coding	o	210.512	190.68	203.225	239.421	226.012	265.713	212.549	263.448	226.445	0.20076	0.268234	0.748451	0.454188	0.999991
1457	NC_005102.4	+	175419182	175419165	175419397	Lsm14b	rna18724	gene10603	protein_coding	o	93.3403	264.535	220.039	221.465	131.633	254.42	268.639	241.942	212.002	0.159977	0.395569	0.404422	0.685902	0.999991
1458	NC_005120.4	-	109187304	109187303	109187304	Il1rapl2	rna69143	gene38351	protein_coding	i	234.344	198.737	274.135	235.83	201.175	203.271	215.501	254.231	227.153	-0.108593	0.274497	-0.395608	0.692394	0.999991
1459	NC_005120.4	+	71279971	71279959	71280295	Gjb1	rna68654	gene37945	protein_coding	o	150.933	290.72	204.687	271.743	248.364	273.02	174.172	152.846	220.811	-0.11872	0.349646	-0.339544	0.7342	0.999991
1460	NC_005115.4	-	39368189	39368148	39368201	Gpm6a	rna58968	gene32286	protein_coding	c	123.13	265.877	233.197	257.378	109.28	252.427	277.495	197.394	214.522	-0.0754864	0.392342	-0.192399	0.84743	0.999991
1461	NC_005103.4	-	83967696	83967675	83967718	Tril	rna20559	gene11677	protein_coding	o	190.653	182.623	136.702	280.123	234.704	250.435	192.869	341.791	226.237	0.371839	0.343678	1.08194	0.279279	0.999991
1462	NC_005109.4	-	15984520	15984510	15984537	Cpeb4	rna42608	gene23414	protein_coding	o	113.2	243.721	185.681	225.056	166.404	221.87	245.022	319.517	215.059	0.306654	0.35629	0.860688	0.38941	0.999991
1463	NC_005115.4	-	20910592	20910573	20910655	Sugp2	rna58686	gene32110	protein_coding	c	212.498	197.394	273.404	265.758	234.704	213.235	234.198	191.249	227.805	-0.122279	0.278542	-0.438997	0.660664	0.999991
1464	NC_005102.4	+	56051171	56051166	56051352	-	-	-	-	u	246.26	216.865	205.418	190.34	161.437	272.356	147.604	319.517	219.974	0.0739231	0.34808	0.212374	0.831815	0.999991
1465	NC_005100.4	-	226260556	226260549	226260578	Myrf	rna7592	gene4167	protein_coding	o	311.796	195.38	240.507	265.758	264.508	164.078	216.485	238.87	237.173	-0.194241	0.306165	-0.634433	0.525798	0.999991
1466	NC_005110.4	-	83934100	83934091	83934124	Psmd2	rna48470	gene26553	protein_coding	c	321.726	216.865	209.804	180.763	211.11	318.191	189.917	172.816	227.649	-0.0520853	0.339897	-0.153239	0.87821	0.999991
1467	NC_005101.4	-	213660070	213660069	213660070	-	-	-	-	u	33.7614	216.865	236.852	241.815	106.797	277.006	262.735	271.129	205.87	0.326526	0.527924	0.61851	0.536239	0.999991
1468	NC_005101.4	+	209852476	209852451	209852732	Kcna2	rna12681	gene7143	protein_coding	o	129.088	236.336	257.321	250.195	191.241	209.913	317.84	165.903	219.73	0.0132146	0.355656	0.0371555	0.970361	0.999991
1469	NC_005102.4	-	60513166	60513156	60513174	Chn1	rna15382	gene8625	protein_coding	c	305.838	167.181	250.742	207.099	285.619	158.764	199.757	304.156	234.894	0.0302055	0.348046	0.086786	0.930842	0.999991
1470	NC_005105.4	+	126445573	126445529	126445676	Chga	rna29774	gene16653	protein_coding	o	107.242	260.506	215.653	238.224	114.248	295.606	271.591	181.264	210.542	0.0667488	0.408475	0.16341	0.870196	0.999991
1471	NC_005115.4	+	54030014	54030006	54030324	Asah1	rna59150	gene32410	protein_coding	o	210.512	232.978	286.562	180.763	170.13	238.477	203.693	218.9	217.752	-0.13339	0.295084	-0.452041	0.651239	0.999991
1472	NC_005101.4	-	209118918	209118913	209118934	Cept1	rna12651	gene7130	protein_coding	c	158.877	229.621	198.839	239.421	152.744	318.856	248.958	179.728	215.881	0.122043	0.341503	0.357369	0.720816	0.999991
1473	NC_005109.4	+	14072792	14072785	14072952	-	-	-	-	u	150.933	248.421	244.894	125.696	111.764	431.784	63.9616	224.276	200.216	0.111448	0.529434	0.210504	0.833274	0.999991
1474	NC_005102.4	-	164937194	164937185	164937205	Adnp	rna18471	gene10459	protein_coding	c	139.017	237.678	178.37	187.946	158.953	267.706	171.22	346.399	210.911	0.343714	0.362281	0.948749	0.342748	0.999991
1475	NC_005112.4	+	78794667	78794639	78794863	Rc3h1	rna51941	gene28380	protein_coding	o	270.091	208.136	154.977	186.749	276.926	236.485	268.639	240.406	230.301	0.324695	0.294386	1.10295	0.270047	0.999991
1476	NC_005114.4	+	106589874	106589858	106590008	Farp1	rna57759	gene31672	protein_coding	i	297.895	204.108	175.446	216.676	244.639	229.842	209.597	267.288	230.686	0.0973743	0.295217	0.32984	0.741521	0.999991
1477	NC_005104.4	-	75557040	75556996	75557078	Lpar1	rna24361	gene13823	protein_coding	o	413.081	185.309	230.273	258.575	263.266	177.363	170.236	239.638	242.218	-0.34829	0.351243	-0.991595	0.321395	0.999991
1478	NC_005104.4	+	136703708	136703684	136703949	Slc6a9	rna25484	gene14440	protein_coding	o	182.709	248.421	216.384	196.325	237.188	330.813	137.763	174.352	215.494	0.0591012	0.352546	0.167641	0.866866	0.999991
1479	NC_005109.4	+	56229800	56229753	56229953	Sat2	rna43896	gene24127	protein_coding	o	220.442	206.794	237.583	254.984	259.541	192.642	245.022	209.683	228.336	-0.0225183	0.2721	-0.0827573	0.934045	0.999991
1480	NC_005119.4	+	4396247	4396232	4396552	Prrt1	rna66145	gene36426	protein_coding	o	156.891	209.479	206.88	221.465	170.13	301.584	174.172	269.592	213.774	0.203638	0.325361	0.625883	0.531392	0.999991
1481	NC_005101.4	-	264837468	264837448	264837494	Srsf11	rna13674	gene7710	protein_coding	o	200.582	212.165	205.418	248.998	167.646	204.599	298.16	250.391	223.495	0.0871308	0.302699	0.287846	0.773465	0.999991
1482	NC_005104.4	-	75558205	75558189	75558207	Lpar1	rna24361	gene13823	protein_coding	c	424.996	193.365	151.322	199.917	434.638	192.642	182.045	212.755	248.96	0.0808709	0.434775	0.186006	0.85244	0.999991
1483	NC_005110.4	+	87973302	87973276	87973452	Pi4ka	rna48708	gene26670	protein_coding	c	152.919	276.62	156.439	223.859	141.568	302.913	213.533	229.653	212.188	0.131331	0.358648	0.366183	0.714229	0.999991
1484	NC_005104.4	+	57531326	57531313	57531531	Ube2r2	rna23890	gene13553	protein_coding	p	137.032	219.55	127.929	219.07	152.744	362.698	189.917	275.737	210.585	0.480121	0.381042	1.26002	0.207662	0.999991
1485	NC_005118.4	+	37649678	37649664	37649945	Ctcf	rna64957	gene35679	protein_coding	o	315.768	188.666	177.639	262.166	397.383	158.099	211.565	230.421	242.714	0.0814655	0.378302	0.215345	0.829498	0.999991
1486	NC_005105.4	+	24184220	24184200	24184543	Lbh	rna27804	gene15544	protein_coding	o	144.975	216.865	185.681	210.691	171.372	268.37	270.607	253.463	215.253	0.343103	0.305385	1.12351	0.26122	0.999991
1487	NC_005118.4	+	25949055	25949032	25949255	Gadd45gip1	rna64546	gene35452	protein_coding	c	208.526	198.065	252.204	210.691	192.482	269.034	194.837	225.812	218.957	0.0219595	0.280718	0.0782261	0.937648	0.999991
1488	NC_005102.4	-	171295481	171295398	171295487	Pmepa1	rna18628	gene10545	protein_coding	p	188.667	184.637	310.686	241.815	86.9276	262.392	216.485	223.508	214.39	-0.228757	0.393406	-0.58148	0.560917	0.999991
1489	NC_005103.4	-	78921056	78921052	78921081	Tra2a	rna20419	gene11593	protein_coding	i	436.912	159.124	171.791	183.157	314.181	235.156	109.227	314.909	240.557	0.0409195	0.453421	0.0902462	0.928092	0.999991
1490	NC_005113.4	-	7036821	7036806	7036859	Nudt9	rna53402	gene29152	protein_coding	c	276.049	185.309	186.412	237.027	304.247	218.549	232.23	226.581	233.3	0.154553	0.295843	0.522417	0.60138	0.999991
1491	NC_005107.4	+	39350273	39350061	39350424	Fez1	rna35583	gene19981	protein_coding	o	113.2	265.206	177.639	253.787	122.94	316.863	170.236	242.71	207.823	0.0726872	0.406759	0.178698	0.858175	0.999991
1492	NC_005106.4	+	11091581	11091552	11091810	Ncln	rna30923	gene17478	protein_coding	o	264.133	210.822	179.101	168.792	384.965	208.585	182.045	252.695	231.392	0.323198	0.345519	0.9354	0.349582	0.999991
1493	NC_005102.4	-	158594240	158594239	158594243	-	-	-	-	u	389.249	218.879	222.963	141.259	650.715	90.3424	138.748	165.903	252.257	0.104622	0.571144	0.18318	0.854657	0.999991
1494	NC_005107.4	+	82576660	82576640	82576960	Lysmd2	rna37155	gene20809	protein_coding	o	258.175	197.394	209.804	203.508	276.926	205.928	237.15	235.029	227.989	0.139252	0.273541	0.509074	0.610701	0.999991
1495	NC_005103.4	-	113883669	113883655	113883679	Htra2	rna20993	gene11996	protein_coding	o	391.235	189.337	182.025	221.465	379.998	208.585	173.188	193.554	242.423	-0.0381887	0.392647	-0.0972596	0.92252	0.999991
1496	NC_005106.4	-	137917295	137917281	137917314	RGD1564963	rna34178	gene19185	protein_coding	c	192.639	255.135	182.025	141.259	96.8622	407.87	129.891	223.508	203.649	0.156683	0.456652	0.343113	0.731513	0.999991
1497	NC_005100.4	+	274090070	274090041	274090236	Mxi1	rna8833	gene4855	protein_coding	o	484.575	162.481	201.763	219.07	407.318	151.456	215.501	182.801	253.121	-0.154093	0.449399	-0.342888	0.731683	0.999991
1498	NC_005103.4	+	178735784	178735772	178735959	Sox5	rna22970	gene12994	protein_coding	i	280.021	230.964	265.362	193.931	203.659	146.806	157.444	307.996	223.273	-0.248372	0.343052	-0.724008	0.469061	0.999991
1499	NC_005102.4	-	164039731	164039721	164039757	B4galt5	rna18437	gene10439	protein_coding	o	220.442	186.651	164.481	269.349	222.286	310.22	245.022	166.671	223.14	0.171234	0.326692	0.524144	0.600179	0.999991
1500	NC_005102.4	-	113156627	113156623	113156639	Tubgcp4	rna16700	gene9552	protein_coding	i	238.316	214.85	169.598	190.34	175.097	255.085	221.406	283.418	218.514	0.207716	0.298292	0.69635	0.48621	0.999991
1501	NC_005103.4	-	23004725	23004703	23004745	Sri	rna19362	gene10952	protein_coding	c	339.6	178.594	214.922	222.662	295.554	181.349	188.933	253.463	234.385	-0.0508072	0.335235	-0.151557	0.879537	0.999991
1502	NC_005112.4	-	30486192	30486191	30486208	-	-	-	-	u	270.091	184.637	141.819	254.984	443.331	176.035	185.981	245.014	237.736	0.304893	0.397323	0.767367	0.442863	0.999991
1503	NC_005115.4	-	14090545	14090542	14090576	Ccser2	rna58348	gene31954	protein_coding	c	256.189	156.438	180.563	227.45	347.71	181.349	256.831	257.303	232.979	0.34995	0.329228	1.06294	0.287808	0.999991
1504	NC_005103.4	-	9867129	9867117	9867165	Psmc2	rna19209	gene10853	protein_coding	o	67.5228	210.822	277.79	277.729	104.313	235.82	268.639	211.219	206.732	-0.0283629	0.463003	-0.0612585	0.951153	0.999991
1505	NC_005100.4	-	219535578	219535557	219535613	Grk2	rna7067	gene3923	protein_coding	p	99.2982	265.206	201.032	191.537	166.404	356.056	152.524	184.337	202.049	0.178191	0.410978	0.433578	0.664595	0.999991
1506	NC_005102.4	-	173650568	173650567	173650569	LOC311687	gene10587	gene10587	pseudogene	p	472.659	310.862	258.052	308.853	273.201	193.306	95.4504	19.2017	241.448	-1.21721	0.581104	-2.09465	0.0362023	0.999991
1507	NC_005109.4	-	10990593	10990579	10990608	Hmox2	rna42069	gene23158	protein_coding	c	305.838	215.522	196.646	280.123	276.926	162.085	194.837	231.189	232.896	-0.203655	0.316753	-0.642945	0.52026	0.999991
1508	NC_005113.4	-	81367480	81367450	81367501	Add1	rna54688	gene29887	protein_coding	o	240.302	178.594	244.163	241.815	226.012	247.113	179.093	217.364	221.807	-0.0541241	0.282666	-0.191477	0.848152	0.999991
1509	NC_005112.4	-	93560198	93560193	93560208	LOC100910850	rna52566	gene28719	transcribed_pseudogene	c	113.2	196.051	214.191	272.94	130.391	276.342	254.862	223.508	210.186	0.149933	0.376663	0.398057	0.690588	0.999991
1510	NC_005116.4	-	5935817	5935761	5935839	Ntrk2	rna60079	gene32918	protein_coding	c	295.909	188.666	200.301	248.998	258.299	227.185	219.438	195.09	229.236	-0.0475126	0.292332	-0.162529	0.870889	0.999991
1511	NC_005102.4	-	10554089	10554060	10554109	-	-	-	-	u	43.6912	304.819	149.129	197.523	135.359	371.998	136.779	218.9	194.775	0.307172	0.528998	0.580668	0.561465	0.999991
1512	NC_005112.4	+	90579532	90579515	90579724	Dcaf8	rna52431	gene28628	protein_coding	o	208.526	194.037	182.756	211.888	237.188	291.62	224.358	198.162	218.567	0.257914	0.276942	0.931292	0.351703	0.999991
1513	NC_005103.4	-	145113962	145113958	145113979	-	-	-	-	u	234.344	213.508	221.501	248.998	181.306	139.499	282.415	264.984	223.319	-0.0803565	0.326173	-0.246361	0.805403	0.999991
1514	NC_005108.4	+	55078190	55078168	55078421	RGD1561618	rna40148	gene22256	protein_coding	p	115.186	210.151	134.509	123.302	115.489	399.234	173.188	311.068	197.766	0.774828	0.431937	1.79385	0.0728377	0.999991
1515	NC_005104.4	+	59068925	59068910	59069179	Gba2	rna24014	gene13610	protein_coding	x	562.028	117.496	192.991	186.749	706.597	106.285	169.252	117.515	269.864	0.0561182	0.632768	0.0886869	0.929331	0.999991
1516	NC_005100.4	+	228729055	228729039	228729209	Mpeg1	rna7778	gene4265	protein_coding	o	317.754	167.181	188.605	277.729	314.181	170.056	250.926	205.843	236.534	-0.011656	0.349787	-0.0333231	0.973417	0.999991
1517	NC_005101.4	+	227097247	227097223	227097567	LOC691807	rna12987	gene7329	protein_coding	o	125.116	188.666	209.804	248.998	186.273	371.998	208.613	130.572	208.755	0.214268	0.397259	0.539367	0.589634	0.999991
1518	NC_005100.4	+	114653789	114653780	114653990	Herc2	rna3797	gene2158	protein_coding	o	192.639	201.422	182.025	198.72	227.254	231.17	313.904	205.843	219.122	0.335655	0.281137	1.19392	0.23251	0.999991
1519	NC_005103.4	+	123636039	123636021	123636226	Grip2	rna21406	gene12222	protein_coding	o	313.782	172.552	251.473	284.911	316.665	176.699	189.917	168.207	234.276	-0.2633	0.34749	-0.75772	0.448619	0.999991
1520	NC_005114.4	+	149113	149093	149258	Dlg5	rna55547	gene30268	protein_coding	i	79.4386	293.405	131.585	155.624	180.064	474.298	105.291	133.644	194.169	0.432749	0.530265	0.8161	0.414443	0.999991
1521	NC_005111.4	+	37677068	37677059	37677356	Cdk2ap1	rna50065	gene27429	protein_coding	o	146.961	196.051	218.577	216.676	130.391	251.763	264.703	251.159	209.535	0.204851	0.336269	0.609188	0.5424	0.999991
1522	NC_005104.4	+	144063718	144063624	144063905	Mrps15	rna25837	gene14620	protein_coding	c	158.877	265.877	271.211	205.902	141.568	172.049	211.565	244.246	208.912	-0.233852	0.328375	-0.712148	0.476373	0.999991
1523	NC_005104.4	+	167299613	167299567	167299834	Eno1	rna26952	gene15148	protein_coding	o	101.284	161.138	198.108	84.9945	60.8493	215.228	127.923	606.007	194.441	0.886591	0.587096	1.51013	0.131011	0.999991
1524	NC_005110.4	+	87207271	87207236	87207448	Slc25a1	rna48646	gene26636	protein_coding	o	180.723	208.136	312.148	196.325	202.417	228.513	136.779	220.436	210.685	-0.190467	0.328482	-0.579839	0.562023	0.999991
1525	NC_005100.4	+	170585191	170585167	170585329	Ilk	rna5220	gene2992	protein_coding	o	164.835	261.849	195.184	186.749	206.143	305.57	138.748	200.466	207.443	0.0712359	0.343857	0.207167	0.835879	0.999991
1526	NC_005111.4	+	22037428	22037335	22037609	Nyap1	rna49617	gene27206	protein_coding	o	224.414	198.065	194.453	247.801	279.41	234.492	272.575	142.861	224.259	0.103899	0.320946	0.323727	0.746145	0.999991
1527	NC_005116.4	+	20182334	20182322	20182668	Dtnbp1	rna60637	gene33193	protein_coding	o	123.13	250.435	149.86	191.537	156.47	264.385	182.045	317.213	204.384	0.360789	0.368051	0.980268	0.326954	0.999991
1528	NC_005115.4	-	19305427	19305415	19305479	Fam32a	rna58460	gene32019	protein_coding	c	121.144	239.021	199.57	209.494	157.711	293.613	232.23	192.017	205.6	0.182122	0.34483	0.528149	0.597396	0.999991
1529	NC_005111.4	+	11198372	11198331	11198515	Atp5j2	rna49163	gene26932	protein_coding	o	107.242	253.121	304.838	262.166	171.372	250.435	224.358	82.1835	206.964	-0.353481	0.437445	-0.808059	0.419056	0.999991
1530	NC_005116.4	+	18411165	18411148	18411405	Nup153	rna60613	gene33176	protein_coding	o	331.656	202.765	155.708	197.523	262.025	154.778	234.198	298.011	229.583	0.102866	0.358076	0.287273	0.773903	0.999991
1531	NC_005114.4	+	60627876	60627876	60628068	-	-	-	-	u	627.565	187.994	236.121	131.682	321.632	96.321	139.732	261.912	250.37	-0.526275	0.528792	-0.99524	0.319619	0.999991
1532	NC_005107.4	+	115165703	115165692	115165904	Pcbp4	rna37832	gene21150	protein_coding	o	192.639	212.165	179.832	247.801	288.103	227.185	214.517	197.394	219.954	0.153524	0.287171	0.534608	0.592921	0.999991
1533	NC_005119.4	-	31047026	31047017	31047039	-	-	-	-	u	220.442	221.565	175.446	223.859	309.214	272.356	204.677	136.716	220.534	0.133306	0.339292	0.392894	0.694398	0.999991
1534	NC_005100.4	+	101072492	101072482	101072712	Nosip	rna3422	gene1959	protein_coding	c	331.656	187.323	236.121	189.143	330.325	182.678	126.939	241.942	228.266	-0.0958351	0.380274	-0.252016	0.801029	0.999991
1535	NC_005104.4	+	169450219	169450209	169450374	Acot7	rna27030	gene15184	protein_coding	o	111.214	213.508	369.168	225.056	199.933	264.385	130.875	117.515	203.957	-0.371823	0.427609	-0.869541	0.384551	0.999991
1536	NC_005107.4	-	1609206	1609192	1609223	Gria4	rna34777	gene19473	protein_coding	o	212.498	193.365	156.439	223.859	269.475	267.706	263.719	174.352	220.177	0.313456	0.300802	1.04207	0.29738	0.999991
1537	NC_005114.4	+	51250732	51250714	51251056	Entpd4	rna57062	gene31272	protein_coding	o	180.723	214.179	210.535	191.537	147.777	234.492	191.885	295.707	208.354	0.126888	0.316516	0.40089	0.688501	0.999991
1538	NC_005100.4	-	220835654	220835636	220835672	Ccdc85b	rna7190	gene3992	protein_coding	o	464.716	224.25	169.598	189.143	340.259	311.549	64.9456	109.066	234.191	-0.339754	0.53507	-0.634972	0.525447	0.999991
1539	NC_005106.4	+	123058607	123058581	123058813	Tef	rna33706	gene18955	protein_coding	o	228.386	240.364	145.474	205.902	336.534	230.506	134.811	237.334	219.914	0.196005	0.359983	0.544483	0.586109	0.999991
1540	NC_005102.4	-	113272852	113272836	113272860	Ppip5k1	rna16721	gene9555	protein_coding	o	335.628	210.822	166.674	185.551	330.325	162.085	201.725	248.087	230.112	0.0726989	0.363102	0.200216	0.841312	0.999991
1541	NC_005115.4	-	18823143	18823137	18823150	-	-	-	-	u	291.937	130.253	209.073	217.873	260.783	184.671	243.054	276.505	226.769	0.191398	0.337841	0.566532	0.571032	0.999991
1542	NC_005102.4	+	149249278	149249261	149249527	Mapre1	rna17741	gene10110	protein_coding	o	202.568	223.579	221.501	209.494	203.659	194.635	225.342	233.493	214.284	-0.00203535	0.258729	-0.00786676	0.993723	0.999991
1543	NC_005106.4	+	139280407	139280385	139280660	Hdac7	rna34237	gene19213	protein_coding	x	119.158	235.664	180.563	171.186	162.679	257.077	134.811	343.327	200.558	0.342259	0.390445	0.876585	0.380712	0.999991
1544	NC_005103.4	-	56209518	56209517	56209519	-	-	-	-	u	494.505	214.179	167.405	64.6437	504.18	114.921	139.732	254.231	244.225	0.109833	0.589812	0.186217	0.852275	0.999991
1545	NC_005109.4	-	51501547	51501540	51501563	Arhgap44	rna43666	gene24015	protein_coding	c	137.032	297.434	120.619	125.696	219.803	326.163	127.923	248.087	200.344	0.43402	0.422481	1.02731	0.304274	0.999991
1546	NC_005116.4	+	12766698	12766676	12766849	Diras2	rna60392	gene33058	protein_coding	o	234.344	163.152	242.701	204.705	285.619	152.785	244.038	251.927	222.409	0.145135	0.32096	0.452188	0.651133	0.999991
1547	NC_005106.4	-	70343006	70342986	70343028	March9	rna32343	gene18302	protein_coding	c	289.951	187.323	257.321	215.479	209.868	169.392	163.348	270.361	220.38	-0.220832	0.315809	-0.699261	0.484389	0.999991
1548	NC_005105.4	-	115573239	115573231	115573270	Sel1l	rna29603	gene16568	protein_coding	c	176.751	188.666	266.824	270.546	162.679	170.056	269.623	211.987	214.641	-0.151214	0.322696	-0.468595	0.639359	0.999991
1549	NC_005120.4	+	76087118	76087082	76087444	Magee1	rna68818	gene38056	protein_coding	o	77.4526	212.836	127.929	179.566	99.3458	393.92	184.013	271.897	193.37	0.6639	0.46493	1.42796	0.153304	0.999991
1550	NC_005106.4	-	18598909	18598893	18598922	Rab11b	rna31447	gene17780	protein_coding	p	142.989	253.792	232.466	203.508	167.646	249.106	180.077	202.002	203.948	-0.0650381	0.314171	-0.207015	0.835998	0.999991
1551	NC_005109.4	-	105291155	105291143	105291199	Rnf157	rna46481	gene25417	protein_coding	c	160.863	236.336	188.605	239.421	221.044	241.135	201.725	196.626	210.719	0.0562707	0.285292	0.197239	0.84364	0.999991
1552	NC_005105.4	-	103308070	103308062	103308076	Zfp36l1	rna29241	gene16355	protein_coding	c	421.024	149.724	182.025	198.72	543.918	102.3	197.789	191.249	248.344	0.124167	0.517913	0.239745	0.810528	0.999991
1553	NC_005118.4	-	26074983	26074973	26074991	Rnaseh2a	rna64582	gene35464	protein_coding	c	152.919	217.536	182.025	174.778	171.372	235.82	163.348	334.11	203.989	0.313499	0.340135	0.921689	0.356691	0.999991
1554	NC_005100.4	+	219859851	219859825	219860125	Pc	rna7078	gene3929	protein_coding	o	331.656	161.809	241.238	280.123	343.985	144.149	196.805	170.511	233.785	-0.245545	0.382757	-0.641517	0.521187	0.999991
1555	NC_005118.4	+	53643971	53643958	53644316	Map1lc3b	rna65429	gene35908	protein_coding	o	172.779	171.209	370.63	259.772	131.633	197.956	142.684	209.683	207.043	-0.515777	0.366465	-1.40744	0.159297	0.999991
1556	NC_005114.4	+	44803369	44803338	44803555	Nefl	rna56892	gene31177	protein_coding	p	148.947	210.151	249.28	271.743	150.261	204.599	243.054	195.858	209.237	-0.152375	0.321037	-0.474634	0.635048	0.999991
1557	NC_005102.4	-	45680716	45680677	45680725	-	-	-	-	u	274.063	208.808	203.225	251.392	206.143	205.928	159.412	239.638	218.576	-0.20318	0.288395	-0.704521	0.481108	0.999991
1558	NC_005105.4	-	61374068	61374035	61374141	Immp2l	rna28557	gene15952	protein_coding	i	238.316	216.193	130.123	223.859	206.143	295.606	161.38	234.261	213.235	0.156767	0.338427	0.463223	0.643204	0.999991
1559	NC_005109.4	-	89366898	89366885	89366911	Vat1	rna45722	gene25067	protein_coding	o	101.284	200.08	176.177	213.085	204.901	458.355	111.195	115.979	197.632	0.364662	0.484677	0.752382	0.451822	0.999991
1560	NC_005103.4	+	119821016	119821005	119821477	Copg1	rna21295	gene12142	protein_coding	e	228.386	340.404	157.902	286.108	298.037	189.321	164.332	89.8642	219.294	-0.453445	0.417008	-1.08738	0.27687	0.999991
1561	NC_005107.4	+	82161996	82161979	82162161	-	-	-	-	u	89.3684	265.206	130.123	189.143	108.039	332.141	201.725	244.246	194.999	0.391585	0.441728	0.886485	0.375356	0.999991
1562	NC_005100.4	-	80617762	80617722	80617822	Tomm40	rna2093	gene1342	protein_coding	o	198.596	220.222	164.481	211.888	321.632	195.299	177.124	248.087	217.166	0.242872	0.314347	0.772622	0.439746	0.999991
1563	NC_005108.4	+	60070547	60070534	60070900	Slc39a10	rna40161	gene22279	protein_coding	o	170.793	222.236	139.626	192.734	191.241	227.849	276.511	259.608	210.075	0.39677	0.300289	1.32129	0.186404	0.999991
1564	NC_005111.4	-	16285731	16285719	16285751	Eif3b	rna49319	gene27026	protein_coding	o	115.186	265.877	141.088	129.287	185.032	320.849	103.323	301.851	195.312	0.480177	0.438918	1.094	0.273954	0.999991
1565	NC_005115.4	-	20506399	20506367	20506430	Lsm4	rna58630	gene32085	protein_coding	o	234.344	224.25	159.364	143.653	212.352	237.149	200.741	278.041	211.237	0.289927	0.308276	0.940478	0.346972	0.999991
1566	NC_005102.4	+	176692277	176692247	176692492	Ppdpf	rna18846	gene10650	protein_coding	o	214.484	232.307	191.529	168.792	198.692	133.521	148.588	394.788	210.337	0.118165	0.399244	0.295972	0.767252	0.999991
1567	NC_005105.4	+	133680094	133679985	133680266	RGD1566401	rna30021	gene16774	lncRNA	i	248.246	101.383	342.12	183.157	165.162	100.307	381.802	241.174	220.419	0.0224025	0.480362	0.0466368	0.962803	0.999991
1568	NC_005100.4	+	256186159	256186128	256186375	-	-	-	-	u	228.386	169.195	200.301	310.051	315.423	96.9853	277.495	229.653	228.436	0.0175173	0.407092	0.0430303	0.965677	0.999991
1569	NC_005101.4	+	110463731	110463726	110463918	-	-	-	-	u	141.003	192.023	410.836	256.181	173.855	262.392	195.821	10.753	205.358	-0.639554	0.645384	-0.990967	0.321702	0.999991
1570	NC_005102.4	+	117416792	117416774	117416874	Ctxn2	rna16833	gene9615	protein_coding	o	172.779	220.893	199.57	243.013	171.372	205.263	236.166	231.957	210.127	0.0128652	0.283735	0.0453423	0.963834	0.999991
1571	NC_005117.4	+	27641597	27641574	27641795	Reep2	rna62667	gene34370	protein_coding	o	164.835	191.351	379.402	268.152	156.47	306.234	112.179	52.2287	203.856	-0.679317	0.501839	-1.35365	0.175846	0.999991
1572	NC_005103.4	+	66421661	66421648	66421872	Clec2l	rna20059	gene11356	protein_coding	o	158.877	203.437	280.714	225.056	147.777	261.063	177.124	178.192	204.03	-0.185946	0.328635	-0.565812	0.571522	0.999991
1573	NC_005113.4	+	82269988	82269971	82270165	-	-	-	-	u	154.905	249.092	193.722	223.859	243.397	296.27	141.7	147.469	206.302	0.00926002	0.357725	0.0258859	0.979348	0.999991
1574	NC_005109.4	+	70721895	70721833	70722044	Taf15	rna44763	gene24592	protein_coding	o	139.017	175.909	213.459	207.099	145.293	241.135	188.933	314.14	203.123	0.27319	0.343482	0.795354	0.426407	0.999991
1575	NC_005103.4	+	44972273	44972254	44972486	Capza2	rna19637	gene11136	protein_coding	o	158.877	218.879	198.839	215.479	151.502	244.456	256.831	205.843	206.338	0.114328	0.305272	0.374511	0.708024	0.999991
1576	NC_005102.4	+	21815387	21815330	21815550	Rabgap1	rna14762	gene8303	protein_coding	o	186.681	212.836	183.487	216.676	176.339	270.363	205.661	208.147	207.524	0.107375	0.283784	0.378367	0.705158	0.999991
1577	NC_005110.4	+	36912230	36912153	36912316	Pcp4	rna47401	gene25943	protein_coding	o	154.905	241.707	197.377	192.734	158.953	235.156	222.39	226.581	203.725	0.0961568	0.298981	0.321615	0.747744	0.999991
1578	NC_005101.4	-	250703864	250703842	250703906	-	-	-	-	u	236.33	175.237	203.956	262.166	240.914	142.821	214.517	281.114	219.632	0.00471797	0.325918	0.0144759	0.98845	0.999991
1579	NC_005111.4	+	30292167	30292090	30292535	-	-	-	-	u	27.8035	296.091	148.398	179.566	176.339	280.327	202.709	224.276	191.939	0.431246	0.523548	0.823699	0.410111	0.999991
1580	NC_005109.4	-	87116826	87116824	87116839	Smarce1	rna45488	gene24939	protein_coding	c	232.358	214.85	189.336	209.494	178.822	217.22	267.655	196.626	213.295	0.0273307	0.280943	0.0972819	0.922502	0.999991
1581	NC_005110.4	-	45475549	45475511	45475570	Tomm70	rna47582	gene26071	protein_coding	p	85.3965	255.806	139.626	205.902	109.28	292.284	258.799	222.74	196.229	0.358499	0.430062	0.833598	0.404507	0.999991
1582	NC_005103.4	-	78450746	78450722	78450753	Tmem176b	rna20389	gene11579	protein_coding	c	186.681	195.38	244.163	253.787	204.901	183.342	243.054	190.481	212.723	-0.102151	0.282622	-0.361442	0.717769	0.999991
1583	NC_005119.4	-	32191731	32191714	32191739	Kif1bp	rna67207	gene36970	protein_coding	o	123.13	220.222	208.342	211.888	158.953	222.535	231.246	242.71	202.378	0.158308	0.319759	0.495085	0.62054	0.999991
1584	NC_005109.4	-	91878656	91878640	91878695	Nsf	rna45958	gene25163	protein_coding	p	39.7193	263.192	149.129	110.134	80.7185	343.434	168.268	309.532	183.016	0.675377	0.556013	1.21468	0.224489	0.999991
1585	NC_005109.4	+	89103616	89103452	89103780	Cntnap1	rna45685	gene25049	protein_coding	o	283.993	215.522	186.412	162.806	356.403	168.064	226.326	182.801	222.791	0.138285	0.357144	0.387196	0.698611	0.999991
1586	NC_005102.4	+	177371469	177371424	177371847	Pcmtd2	rna18957	gene10680	protein_coding	o	172.779	202.765	178.37	177.172	194.966	203.271	264.703	268.056	207.76	0.347149	0.279743	1.24096	0.214621	0.999991
1587	NC_005115.4	+	20729231	20729216	20729474	Klhl26	rna58665	gene32100	protein_coding	c	313.782	176.58	189.336	186.749	326.599	184.671	193.853	220.436	224.001	0.100087	0.342941	0.291848	0.770403	0.999991
1588	NC_005100.4	-	100495115	100495080	100495130	Emc10	rna3291	gene1927	protein_coding	o	232.358	187.323	239.776	149.638	216.077	251.763	170.236	218.9	208.259	0.0853359	0.304033	0.280679	0.778956	0.999991
1589	NC_005100.4	+	222168774	222168762	222168922	Trmt112	rna7376	gene4062	protein_coding	o	67.5228	196.051	252.204	262.166	45.9474	230.506	246.99	256.535	194.74	0.00159241	0.536143	0.00297013	0.99763	0.999991
1590	NC_005102.4	+	111410580	111410571	111410769	LOC100910827	rna16580	gene9502	lncRNA	o	210.512	212.165	257.321	190.34	153.986	236.485	224.358	166.671	206.48	-0.155282	0.298181	-0.520765	0.602531	0.999991
1591	NC_005120.4	+	136495648	136495635	136495746	Arhgap36	rna69579	gene38637	protein_coding	o	178.737	216.193	184.218	161.609	217.319	242.463	204.677	238.102	205.415	0.282961	0.269877	1.04848	0.294418	0.999991
1592	NC_005102.4	+	153520740	153520703	153521050	Manbal	rna18006	gene10227	protein_coding	o	146.961	238.35	163.019	184.354	257.057	218.549	139.732	285.722	204.218	0.294099	0.340094	0.864757	0.387172	0.999991
1593	NC_005120.4	-	78490873	78490864	78490886	Itm2a	rna68876	gene38103	protein_coding	o	111.214	218.208	186.412	193.931	109.28	274.349	232.23	246.55	196.522	0.277763	0.37954	0.731842	0.464265	0.999991
1594	NC_005102.4	+	51819670	51819615	51819882	Scn2a	rna15195	gene8513	protein_coding	c	264.133	215.522	202.494	140.061	315.423	136.842	163.348	292.635	216.307	0.14419	0.38136	0.378093	0.705361	0.999991
1595	NC_005100.4	-	216073029	216072999	216073039	Th	rna6821	gene3825	protein_coding	o	291.937	267.22	372.823	287.306	72.0257	98.9781	123.987	172.816	210.887	-1.37889	0.347565	-3.96729	7.26942e-05	0.89124
1596	NC_005104.4	-	156676705	156676632	156676717	Pink1	rna26507	gene14907	protein_coding	p	238.316	194.037	176.908	196.325	268.234	256.413	154.492	214.291	212.377	0.153372	0.305688	0.501728	0.615859	0.999991
1597	NC_005100.4	+	209799907	209799895	209800063	Glrx3	rna6425	gene3632	protein_coding	o	75.4666	282.663	198.108	201.114	141.568	253.092	235.182	168.975	194.521	0.0698654	0.416369	0.167797	0.866743	0.999991
1598	NC_005114.4	-	48942872	48942845	48942899	Elp3	rna57025	gene31244	protein_coding	o	119.158	218.879	214.922	211.888	173.855	278.999	194.837	182.033	199.321	0.112185	0.33318	0.33671	0.736336	0.999991
1599	NC_005101.4	+	205552992	205552946	205553352	Nras	rna12479	gene7042	protein_coding	e	123.13	232.307	193.722	229.844	202.417	243.792	198.773	194.322	202.288	0.101087	0.31318	0.322776	0.746865	0.999991
1600	NC_005104.4	-	56567141	56567126	56567173	Ndufb6	rna23861	gene13534	protein_coding	c	127.102	189.337	227.349	248.998	122.94	252.427	285.367	165.135	202.332	0.0564518	0.377203	0.149659	0.881034	0.999991
1601	NC_005104.4	+	148060748	148060677	148060941	Ptp4a2	rna26026	gene14714	protein_coding	o	184.695	171.209	253.666	161.609	255.815	248.442	167.284	202.77	205.686	0.178399	0.310541	0.574477	0.565645	0.999991
1602	NC_005100.4	+	82163009	82162951	82163202	Cic	rna2253	gene1415	protein_coding	o	131.074	226.264	239.045	222.662	122.94	262.392	200.741	175.888	197.626	-0.10711	0.352685	-0.303699	0.761357	0.999991
1603	NC_005107.4	+	59295511	59295480	59295740	Dnaja4	rna36376	gene20439	protein_coding	p	202.568	194.708	145.474	167.595	189.999	280.327	179.093	272.665	204.054	0.382086	0.308723	1.23763	0.215852	0.999991
1604	NC_005100.4	+	211920841	211920825	211921022	Inpp5a	rna6459	gene3650	protein_coding	o	196.61	173.223	175.446	217.873	209.868	207.92	188.933	298.779	208.582	0.250422	0.294318	0.850854	0.39485	0.999991
1605	NC_005115.4	-	20589503	20589490	20589544	Isyna1	rna58645	gene32091	protein_coding	c	206.54	157.109	169.598	207.099	167.646	229.842	125.955	376.354	205.018	0.28666	0.386498	0.741686	0.458277	0.999991
1606	NC_005100.4	+	251490888	251490853	251491168	-	-	-	-	u	103.27	250.435	183.487	143.653	84.4439	306.899	221.406	222.74	189.542	0.291569	0.436904	0.667353	0.504547	0.999991
1607	NC_005104.4	+	8980027	8979931	8980201	LOC102556004	rna23303	gene13184	lncRNA	o	160.863	175.909	203.225	216.676	218.561	209.913	230.262	240.406	206.977	0.245984	0.269021	0.914369	0.360523	0.999991
1608	NC_005109.4	+	90749223	90749185	90749425	Adam11	rna45847	gene25125	protein_coding	o	307.824	175.909	237.583	196.325	199.933	262.392	159.412	164.367	212.968	-0.216412	0.328619	-0.658548	0.510186	0.999991
1609	NC_005116.4	+	32209597	32209584	32209794	Serpinb6	rna60903	gene33345	protein_coding	o	272.077	169.195	188.605	229.844	266.992	189.321	243.054	193.554	219.08	0.0593689	0.303936	0.195334	0.845132	0.999991
1610	NC_005100.4	+	157922576	157922556	157922753	Fam181b	rna4657	gene2638	protein_coding	p	123.13	203.437	134.509	137.667	135.359	323.506	184.013	299.547	192.646	0.652863	0.376244	1.73521	0.0827029	0.999991
1611	NC_005113.4	-	85181573	85181567	85181602	Nefh	rna54969	gene29980	protein_coding	c	119.158	255.135	312.879	169.989	170.13	290.956	113.163	105.226	192.079	-0.339426	0.439407	-0.772463	0.43984	0.999991
1612	NC_005102.4	+	147062721	147062699	147063037	Fkbp1a	rna17585	gene10038	protein_coding	o	184.695	202.094	198.108	207.099	137.842	250.435	184.013	245.782	201.258	0.0493528	0.308476	0.159989	0.872889	0.999991
1613	NC_005100.4	-	100955094	100955088	100955112	Cpt1c	rna3393	gene1951	protein_coding	c	224.414	197.394	152.053	159.215	346.468	192.642	151.54	278.041	212.721	0.403683	0.353894	1.14069	0.253999	0.999991
1614	NC_005100.4	-	128692120	128692107	128692135	Synm	rna4064	gene2295	protein_coding	c	278.035	195.38	127.929	149.638	312.939	205.263	272.575	202.77	218.066	0.409811	0.350552	1.16904	0.242386	0.999991
1615	NC_005109.4	+	91479559	91479549	91479707	Plekhm1	rna45936	gene25150	protein_coding	i	407.123	145.024	156.439	278.926	330.325	131.528	220.422	211.987	235.222	-0.138134	0.430013	-0.321232	0.748034	0.999991
1616	NC_005110.4	+	82392088	82392060	82392327	Tra2b	rna48401	gene26521	protein_coding	o	107.242	193.365	163.75	195.128	178.822	281.656	218.454	238.87	197.161	0.471526	0.322673	1.46131	0.14393	0.999991
1617	NC_005120.4	-	116751228	116751218	116751259	Amot	rna69288	gene38436	protein_coding	o	178.737	217.536	171.06	203.508	211.11	197.956	238.134	231.957	206.25	0.187592	0.268604	0.698395	0.48493	0.999991
1618	NC_005111.4	+	11251005	11250989	11251229	Pdap1	rna49174	gene26936	protein_coding	o	83.4105	274.606	201.032	221.465	127.908	241.799	194.837	191.249	192.038	-0.0521906	0.401055	-0.130133	0.896461	0.999991
1619	NC_005110.4	-	47116885	47116874	47116896	Rpl24	rna47658	gene26102	protein_coding	o	123.13	226.936	180.563	180.763	120.457	304.906	223.374	187.409	193.442	0.230272	0.370178	0.622058	0.533904	0.999991
1620	NC_005117.4	-	29234397	29234339	29234417	Pfdn1	rna62736	gene34407	protein_coding	c	236.33	231.636	203.956	192.734	197.45	188.656	175.156	230.421	207.042	-0.125294	0.270865	-0.46257	0.643673	0.999991
1621	NC_005111.4	+	2535825	2535801	2536068	Ctxn1	rna48950	gene26771	protein_coding	o	178.737	226.264	179.832	174.778	245.881	232.499	212.549	182.801	204.168	0.197829	0.278325	0.710786	0.477217	0.999991
1622	NC_005114.4	+	73042061	73041868	73042398	-	-	-	-	u	492.519	167.852	83.3369	253.787	367.579	182.013	166.3	198.162	238.944	-0.120239	0.504274	-0.23844	0.81154	0.999991
1623	NC_005117.4	-	40494292	40494286	40494304	Fem1c	rna62986	gene34581	protein_coding	c	383.291	158.452	183.487	247.801	325.357	99.6424	225.342	225.044	231.052	-0.149039	0.429562	-0.346955	0.728625	0.999991
1624	NC_005103.4	+	172134613	172134597	172134741	Mgst1	rna22813	gene12944	protein_coding	o	89.3684	213.508	168.867	203.508	160.195	262.392	186.965	262.68	193.435	0.363434	0.365207	0.995145	0.319666	0.999991
1625	NC_005104.4	-	126656335	126656322	126656357	Mrpl37	rna25117	gene14267	protein_coding	o	212.498	167.181	204.687	149.638	202.417	232.499	100.371	340.255	201.193	0.257655	0.393306	0.655101	0.512403	0.999991
1626	NC_005108.4	-	82415011	82414994	82415015	Tuba4a	rna40785	gene22540	protein_coding	p	196.61	214.179	222.963	179.566	176.339	287.634	158.428	161.295	199.627	-0.0527172	0.319847	-0.16482	0.869085	0.999991
1627	NC_005105.4	-	126448919	126448904	126448932	Itpk1	rna29775	gene16654	protein_coding	o	178.737	230.293	227.349	178.369	178.822	201.942	100.371	288.026	197.989	-0.0839676	0.368328	-0.227969	0.81967	0.999991
1628	NC_005106.4	-	119393386	119393380	119393399	Ift27	rna33467	gene18849	protein_coding	c	423.01	159.795	184.949	219.07	453.265	176.699	185.981	85.2557	236.003	-0.128832	0.505062	-0.255082	0.798659	0.999991
1629	NC_005117.4	+	56458306	56458282	56458692	Csf1r	rna63234	gene34747	protein_coding	o	242.288	210.822	112.578	184.354	295.554	199.285	128.907	309.532	210.415	0.319404	0.389716	0.819582	0.412455	0.999991
1630	NC_005106.4	+	74992591	74992526	74992794	Polr2k	rna32525	gene18391	protein_coding	o	133.06	181.28	206.149	268.152	161.437	209.249	259.783	202.002	202.639	0.0750176	0.329599	0.227602	0.819955	0.999991
1631	NC_005108.4	+	17355684	17355632	17355958	Vegfa	rna39348	gene21871	protein_coding	o	176.751	221.565	170.329	210.691	146.535	210.578	303.08	187.409	203.367	0.120491	0.326388	0.369166	0.712004	0.999991
1632	NC_005100.4	+	166872766	166872748	166872929	-	-	-	-	u	150.933	209.479	180.563	253.787	134.117	197.292	242.07	241.942	201.273	0.036123	0.330395	0.109333	0.912939	0.999991
1633	NC_005100.4	-	53026606	53026598	53026629	Mpc1	rna905	gene582	protein_coding	o	123.13	241.707	212.728	228.647	122.94	213.235	226.326	198.93	195.955	-0.0867359	0.346989	-0.249967	0.802613	0.999991
1634	NC_005104.4	-	21692892	21692883	21692915	Rab2a	rna23463	gene13282	protein_coding	i	109.228	230.964	211.997	232.239	207.384	245.785	158.428	178.192	196.777	0.00304654	0.343681	0.00886442	0.992927	0.999991
1635	NC_005107.4	+	21895868	21895836	21896107	LOC500956	rna35159	gene19771	protein_coding	o	399.179	155.095	196.646	205.902	330.325	130.199	208.613	202.77	228.591	-0.129552	0.410791	-0.315371	0.75248	0.999991
1636	NC_005107.4	+	118091396	118091378	118091809	Map4	rna38110	gene21272	protein_coding	i	103.27	205.451	166.674	243.013	149.019	227.849	286.351	205.843	198.434	0.270082	0.364172	0.741632	0.458311	0.999991
1637	NC_005110.4	-	58801339	58801281	58801340	Lsamp	rna47780	gene26180	protein_coding	c	248.246	179.937	201.032	186.749	243.397	180.021	204.677	238.87	210.366	0.0913897	0.283247	0.32265	0.74696	0.999991
1638	NC_005100.4	+	267038884	267038867	267039108	Neurl1	rna8758	gene4804	protein_coding	o	218.456	204.108	211.997	181.96	221.044	247.777	138.748	200.466	203.07	-0.0133915	0.300882	-0.0445076	0.9645	0.999991
1639	NC_005114.4	-	37400888	37400873	37400903	Gjb6	rna56674	gene31072	protein_coding	o	141.003	247.078	214.922	173.58	165.162	229.178	202.709	187.409	195.13	0.0081848	0.308058	0.026569	0.978803	0.999991
1640	NC_005114.4	-	65507692	65507651	65507721	Calm-ps2	gene31435	gene31435	pseudogene	c	81.4245	206.794	271.211	201.114	165.162	202.606	231.246	187.409	193.371	0.0397364	0.383313	0.103666	0.917435	0.999991
1641	NC_005107.4	+	107320133	107320057	107320612	Pik3cb	rna37618	gene21045	protein_coding	i	17.8737	260.506	122.812	235.83	144.051	360.705	252.894	96.7768	186.431	0.418897	0.62055	0.675041	0.49965	0.999991
1642	NC_005103.4	-	159371264	159371260	159371279	Ndufa9	rna22326	gene12645	protein_coding	c	236.33	185.309	201.032	227.45	245.881	185.335	213.533	192.017	210.861	-0.0210483	0.274521	-0.0766726	0.938884	0.999991
1643	NC_005105.4	+	136363675	136363666	136364129	Klc1	rna30324	gene16885	protein_coding	o	103.27	207.465	129.392	198.72	242.155	300.256	168.268	215.828	195.669	0.531026	0.353363	1.50278	0.132896	0.999991
1644	NC_005102.4	-	160872503	160872499	160872526	Sdc4	rna18271	gene10359	protein_coding	c	135.046	200.08	150.591	245.407	151.502	277.006	191.885	223.508	196.878	0.206937	0.340025	0.608593	0.542794	0.999991
1645	NC_005100.4	+	162282706	162282698	162283095	Gab2	rna4680	gene2650	protein_coding	c	417.052	184.637	182.025	205.902	391.174	151.456	106.275	186.641	228.145	-0.241325	0.461677	-0.522715	0.601173	0.999991
1646	NC_005108.4	+	38351702	38351688	38351955	Bend6	rna39725	gene22058	protein_coding	p	129.088	248.421	159.364	199.917	223.528	213.899	165.316	238.102	197.204	0.18419	0.32242	0.571272	0.567815	0.999991
1647	NC_005110.4	-	60585206	60585169	60585212	Atg3	rna47815	gene26196	protein_coding	o	256.189	187.323	248.549	278.926	180.064	181.349	247.974	113.674	211.756	-0.424668	0.334903	-1.26803	0.204786	0.999991
1648	NC_005120.4	-	71956241	71956232	71956268	Nhsl2	rna68692	gene37958	protein_coding	i	73.4807	259.163	113.309	106.542	122.94	360.705	104.307	294.939	179.423	0.671181	0.508385	1.32022	0.186761	0.999991
1649	NC_005104.4	+	156879651	156879623	156880001	LOC102555044	rna26513	gene14913	lncRNA	x	144.975	232.307	199.57	195.128	104.313	238.477	249.942	188.945	194.207	0.0160323	0.358825	0.0446799	0.964362	0.999991
1650	NC_005100.4	-	220075248	220075246	220075261	Ccs	rna7105	gene3938	protein_coding	c	200.582	185.309	170.329	167.595	224.77	251.099	209.597	211.987	202.659	0.313636	0.263774	1.18904	0.234425	0.999991
1651	NC_005108.4	-	85237526	85237502	85237552	Scg2	rna40879	gene22578	protein_coding	c	51.6351	270.577	119.888	146.047	98.104	355.391	184.013	216.596	180.281	0.532331	0.509795	1.04421	0.29639	0.999991
1652	NC_005106.4	-	122940374	122940363	122940401	Rangap1	rna33702	gene18953	protein_coding	c	202.568	198.065	190.067	159.215	160.195	300.256	137.763	218.9	195.879	0.127768	0.339581	0.37625	0.706731	0.999991
1653	NC_005108.4	-	100767573	100767547	100767584	Stk25	rna41420	gene22813	protein_coding	o	150.933	210.822	209.804	215.479	160.195	221.206	188.933	216.596	196.746	-0.00320039	0.289026	-0.011073	0.991165	0.999991
1654	NC_005105.4	+	108959800	108959757	108959928	Dlst	rna29443	gene16482	protein_coding	c	258.175	196.051	192.26	225.056	255.815	225.192	124.971	188.945	208.308	-0.129408	0.325115	-0.398037	0.690603	0.999991
1655	NC_005100.4	-	88116878	88116861	88116903	Psmd8	rna2646	gene1616	protein_coding	c	97.3122	203.437	170.329	161.609	158.953	321.513	191.885	202.002	188.38	0.460905	0.361908	1.27354	0.202827	0.999991
1656	NC_005100.4	-	72620343	72620300	72620378	Rpl28	rna1697	gene1106	protein_coding	c	139.017	237.678	129.392	204.705	222.286	229.178	109.227	293.403	195.611	0.263042	0.387403	0.678989	0.497145	0.999991
1657	NC_005119.4	-	11726491	11726468	11726521	Sumo3	rna66687	gene36695	protein_coding	o	117.172	170.538	193.722	204.705	160.195	290.956	217.47	193.554	193.539	0.326178	0.331888	0.982797	0.325708	0.999991
1658	NC_005109.4	+	7052810	7052774	7053041	Carhsp1	rna41990	gene23120	protein_coding	c	174.765	212.165	182.025	172.383	271.959	185.335	158.428	254.999	201.507	0.228337	0.307071	0.743598	0.45712	0.999991
1659	NC_005106.4	+	11323546	11323525	11323666	Mrpl54	rna30970	gene17497	protein_coding	o	198.596	191.351	220.77	214.282	239.672	224.528	157.444	176.656	202.912	-0.0487643	0.286062	-0.170468	0.864642	0.999991
1660	NC_005100.4	+	221908053	221908018	221908473	Nrxn2	rna7355	gene4055	protein_coding	o	228.386	224.25	157.902	202.311	213.593	295.606	151.54	138.253	201.48	-0.0215144	0.347917	-0.0618379	0.950692	0.999991
1661	NC_005118.4	-	11046906	11046875	11046922	Herpud1	rna64084	gene35216	protein_coding	o	146.961	206.122	198.108	221.465	114.248	271.692	172.204	207.379	192.272	-0.0128967	0.349424	-0.0369085	0.970558	0.999991
1662	NC_005102.4	+	79718023	79718000	79718108	C1qtnf4	rna15941	gene9132	protein_coding	o	166.821	173.223	259.514	159.215	176.339	274.349	113.163	215.828	192.306	0.0385661	0.364165	0.105903	0.91566	0.999991
1663	NC_005102.4	-	160018543	160018517	160018570	Serinc3	rna18224	gene10331	protein_coding	p	144.975	203.437	154.977	190.34	177.581	203.271	269.623	237.334	197.692	0.352657	0.297134	1.18686	0.235281	0.999991
1664	NC_005113.4	+	86751833	86751816	86751930	LOC100360491	rna55097	gene30030	transcribed_pseudogene	o	180.723	198.065	123.543	153.23	119.215	304.241	126.939	316.445	190.3	0.407659	0.412945	0.987201	0.323544	0.999991
1665	NC_005106.4	-	26946124	26946110	26946158	Txnrd1	rna31616	gene17894	protein_coding	o	97.3122	187.323	266.824	228.647	89.4112	151.456	354.249	179.728	194.369	-0.0140857	0.463424	-0.0303949	0.975752	0.999991
1666	NC_005118.4	+	54840833	54840823	54840971	Banp	rna65488	gene35936	protein_coding	c	341.586	185.98	136.702	207.099	284.377	167.399	160.396	248.855	216.549	-0.0103653	0.378649	-0.0273745	0.978161	0.999991
1667	NC_005112.4	-	86386842	86386807	86386847	-	-	-	-	u	184.695	159.795	226.618	203.508	144.051	207.256	222.39	239.638	198.494	0.0723047	0.303679	0.238095	0.811807	0.999991
1668	NC_005106.4	-	75279441	75279435	75279468	Ankrd46	rna32539	gene18399	protein_coding	o	75.4666	210.822	236.852	243.013	58.3657	268.37	258.799	140.557	186.531	-0.0800553	0.50578	-0.158281	0.874235	0.999991
1669	NC_005109.4	+	75536238	75536222	75536422	Mrps23	rna44973	gene24690	protein_coding	c	156.891	170.538	191.529	197.523	233.463	251.763	199.757	188.177	198.705	0.282715	0.276719	1.02167	0.306939	0.999991
1670	NC_005113.4	+	19429980	19429942	19430207	Ankrd17	rna53712	gene29332	protein_coding	c	216.47	178.594	183.487	199.917	285.619	185.335	162.364	235.029	205.852	0.158801	0.303801	0.522714	0.601173	0.999991
1671	NC_005113.4	-	81658405	81658397	81658423	Rnf4	rna54714	gene29892	protein_coding	c	240.302	199.408	166.674	185.551	199.933	173.378	214.517	253.463	204.153	0.0924218	0.28978	0.318938	0.749774	0.999991
1672	NC_005112.4	-	82738110	82738042	82738136	Atp1b1	rna52097	gene28456	protein_coding	c	35.7474	208.136	335.541	186.749	29.8037	198.621	234.198	203.538	179.042	-0.20508	0.626803	-0.327184	0.743529	0.999991
1673	NC_005100.4	+	199247994	199247968	199248261	Setd1b	rna6124	gene3478	misc_RNA	o	196.61	211.493	184.218	204.705	183.79	189.321	202.709	224.276	199.64	0.00615929	0.26217	0.0234935	0.981257	0.999991
1674	NC_005102.4	+	154424965	154424953	154425195	LOC102554728	rna18041	gene10241	lncRNA	x	184.695	204.108	386.713	186.749	151.502	240.47	133.827	50.6926	192.345	-0.741147	0.467638	-1.58487	0.112995	0.999991
1675	NC_005110.4	-	84041176	84041166	84041207	Ap2m1	rna48496	gene26564	protein_coding	o	81.4245	147.71	369.899	238.224	74.5093	239.806	130.875	189.713	184.02	-0.400775	0.496208	-0.807676	0.419277	0.999991
1676	NC_005110.4	-	88090933	88090921	88090951	Ydjc	rna48724	gene26677	protein_coding	c	218.456	147.71	171.791	173.58	319.148	249.106	178.109	187.409	205.664	0.395979	0.321546	1.23148	0.218142	0.999991
1677	NC_005100.4	+	132404364	132404303	132404734	-	-	-	-	u	97.3122	239.693	271.211	162.806	81.9603	472.305	28.5367	36.0993	173.74	-0.316843	0.715264	-0.442973	0.657785	0.999991
1678	NC_005118.4	+	57785570	57785536	57785618	Tsnax	rna65667	gene36029	protein_coding	o	83.4105	196.051	179.832	227.45	99.3458	248.442	298.16	182.801	189.436	0.267077	0.428761	0.622904	0.533347	0.999991
1679	NC_005104.4	+	169569804	169569787	169569986	Chd5	rna27049	gene15190	protein_coding	c	117.172	122.196	171.791	258.575	134.117	380.634	130.875	198.162	189.19	0.335272	0.44092	0.76039	0.447021	0.999991
1680	NC_005100.4	+	198403527	198403504	198403879	Sez6l2	rna6028	gene3425	protein_coding	o	123.13	130.253	278.521	215.479	158.953	271.027	118.083	221.204	189.581	0.040079	0.401694	0.099775	0.920523	0.999991
1681	NC_005101.4	+	221754334	221754333	221754548	-	-	-	-	u	83.4105	211.493	138.895	208.296	83.2021	113.592	367.041	329.502	191.929	0.47288	0.510632	0.926067	0.354411	0.999991
1682	NC_005113.4	+	104292832	104292817	104293044	-	-	-	-	u	236.33	177.252	148.398	203.508	263.266	203.271	198.773	218.9	206.212	0.213796	0.293366	0.728769	0.466143	0.999991
1683	NC_005107.4	+	82286449	82286427	82286522	Gnb5	rna37140	gene20801	protein_coding	o	351.516	160.466	223.694	180.763	230.979	305.57	130.875	82.9515	208.352	-0.283456	0.44963	-0.63042	0.52842	0.999991
1684	NC_005111.4	+	49395073	49395050	49395326	Sgsm1	rna50595	gene27679	protein_coding	o	123.13	187.994	198.108	207.099	156.47	247.113	224.358	190.481	191.844	0.187827	0.315016	0.596247	0.55101	0.999991
1685	NC_005109.4	+	106698321	106698316	106698490	Tnrc6c	rna46567	gene25454	protein_coding	e	403.151	181.951	160.826	114.922	533.984	69.7497	190.901	183.569	229.882	0.186343	0.566912	0.328698	0.742384	0.999991
1686	NC_005107.4	-	12898428	12898415	12898440	Endod1	rna34906	gene19579	protein_coding	o	176.751	215.522	287.293	197.523	152.744	219.213	167.284	128.268	193.075	-0.397083	0.320175	-1.24021	0.214899	0.999991
1687	NC_005109.4	-	88684062	88684057	88684070	-	-	-	-	u	246.26	193.365	181.294	245.407	208.626	197.956	223.374	152.078	206.045	-0.144217	0.291934	-0.494007	0.621302	0.999991
1688	NC_005106.4	+	70585072	70585062	70585321	Ddit3	rna32395	gene18319	protein_coding	o	129.088	241.707	158.633	168.792	217.319	308.227	131.859	151.31	188.367	0.207832	0.37759	0.550418	0.582033	0.999991
1689	NC_005116.4	+	9117754	9117718	9117885	Cxcl14	rna60196	gene32967	protein_coding	o	186.681	161.138	160.095	229.844	329.083	247.113	170.236	152.078	204.533	0.28454	0.349523	0.814082	0.415598	0.999991
1690	NC_005102.4	+	8307080	8307046	8307283	Rapgef1	rna14231	gene7953	protein_coding	o	353.502	190.008	188.605	181.96	281.894	120.235	202.709	205.075	215.498	-0.170681	0.378114	-0.4514	0.651701	0.999991
1691	NC_005109.4	+	74538386	74538370	74538616	Trim37	rna44902	gene24661	protein_coding	o	174.765	266.549	170.329	187.946	213.593	271.692	151.54	109.066	193.185	-0.102777	0.369783	-0.277938	0.78106	0.999991
1692	NC_005108.4	+	10155306	10155272	10155475	Mllt1	rna38948	gene21680	protein_coding	o	303.852	167.852	149.86	158.018	254.574	191.313	178.109	255.767	207.418	0.183565	0.345524	0.531266	0.595234	0.999991
1693	NC_005109.4	+	5211912	5211864	5211983	Dexi	rna41922	gene23092	protein_coding	o	222.428	143.01	139.626	196.325	412.285	200.613	178.109	191.249	210.456	0.488813	0.37763	1.29442	0.195519	0.999991
1694	NC_005109.4	+	90234691	90234659	90234895	Tmub2	rna45794	gene25104	protein_coding	o	226.4	167.181	192.26	210.691	212.352	180.685	213.533	215.06	202.27	0.0490405	0.27145	0.180661	0.856633	0.999991
1695	NC_005120.4	+	65804666	65804647	65805081	-	-	-	-	u	327.684	143.681	124.274	258.575	316.665	177.363	234.198	166.671	218.639	0.0732141	0.404328	0.181076	0.856308	0.999991
1696	NC_005101.4	+	174111698	174111680	174111907	Serpini1	rna11278	gene6407	protein_coding	o	174.765	192.694	133.778	207.099	213.593	189.321	222.39	250.391	198.004	0.307331	0.290855	1.05665	0.290672	0.999991
1697	NC_005103.4	+	155227896	155227893	155228098	-	-	-	-	u	434.926	175.237	202.494	269.349	217.319	111.599	233.214	135.18	222.415	-0.630146	0.402423	-1.56588	0.117377	0.999991
1698	NC_005116.4	-	15673649	15673641	15673669	Bicd2	rna60522	gene33136	protein_coding	o	305.838	165.166	174.715	132.879	315.423	141.492	233.214	217.364	210.761	0.225865	0.381794	0.591588	0.554126	0.999991
1699	NC_005108.4	-	37902337	37902323	37902377	Dst	rna39707	gene22056	protein_coding	o	77.4526	252.449	160.826	131.682	130.391	237.149	220.422	234.261	180.579	0.393065	0.404902	0.970766	0.331665	0.999991
1700	NC_005109.4	+	12995675	12995667	12995763	Hcfc1r1	rna42205	gene23249	protein_coding	o	160.863	177.923	163.019	162.806	299.279	272.356	164.332	162.063	195.33	0.431942	0.326776	1.32183	0.186226	0.999991
1701	NC_005115.4	+	71032359	71032318	71032530	Ash2l	rna59469	gene32579	protein_coding	c	232.358	186.651	166.674	149.638	196.208	212.57	181.061	248.087	196.656	0.19523	0.292941	0.666446	0.505126	0.999991
1702	NC_005102.4	+	2502251	2502224	2502694	Anapc2	rna13851	gene7781	protein_coding	o	190.653	220.893	191.529	158.018	153.986	207.92	189.917	217.364	191.285	0.0156576	0.285856	0.0547745	0.956318	0.999991
1703	NC_005104.4	-	48542166	48542133	48542181	-	-	-	-	u	117.172	230.964	289.486	165.201	234.704	271.027	145.636	37.6354	186.478	-0.225285	0.526172	-0.428158	0.668536	0.999991
1704	NC_005111.4	+	18521226	18521182	18521444	Dhrsx	rna49427	gene27090	protein_coding	o	200.582	166.509	236.121	146.047	178.822	258.406	131.859	206.611	190.62	0.0523002	0.334018	0.156579	0.875576	0.999991
1705	NC_005106.4	-	123583079	123583062	123583121	Ndufa6	rna33756	gene18984	protein_coding	c	137.032	223.579	154.977	164.004	189.999	219.878	156.46	257.303	187.904	0.273197	0.316921	0.862037	0.388667	0.999991
1706	NC_005115.4	-	19288360	19288350	19288365	Ap1m1	rna58459	gene32018	protein_coding	c	125.116	171.88	279.252	210.691	100.588	209.249	213.533	183.569	186.735	-0.157471	0.376441	-0.418315	0.675717	0.999991
1707	NC_005102.4	+	7269069	7269044	7269372	Tsc1	rna14184	gene7940	protein_coding	o	144.975	181.951	213.459	262.166	125.424	257.742	219.438	121.355	190.814	-0.149129	0.371856	-0.401039	0.688391	0.999991
1708	NC_005112.4	+	103292850	103292836	103293079	Bpnt1	rna52821	gene28865	protein_coding	o	188.667	222.236	144.012	210.691	181.306	209.913	222.39	182.801	195.252	0.0578889	0.289448	0.199997	0.841483	0.999991
1709	NC_005114.4	+	3453251	3453236	3453420	Ap3m1	rna55601	gene30295	protein_coding	c	289.951	167.852	167.405	158.018	329.083	171.385	139.732	231.189	206.827	0.1585	0.37832	0.418957	0.675247	0.999991
1710	NC_005102.4	+	173963504	173963341	173963559	Fam217b	rna18713	gene10593	protein_coding	p	156.891	200.751	184.949	219.07	180.064	200.613	230.262	174.352	193.369	0.0405552	0.280845	0.144404	0.885181	0.999991
1711	NC_005100.4	-	220645685	220645675	220645695	Sf3b2	rna7166	gene3979	protein_coding	o	178.737	198.065	131.585	172.383	186.273	223.199	191.885	254.231	192.045	0.333004	0.292958	1.13669	0.255666	0.999991
1712	NC_005120.4	-	124722628	124722579	124722641	Lamp2	rna69442	gene38545	protein_coding	o	274.063	176.58	184.218	175.975	265.75	172.049	179.093	203.538	203.908	0.021692	0.313074	0.0692872	0.944761	0.999991
1713	NC_005109.4	+	95725813	95725796	95726151	Psmd12	rna46116	gene25240	protein_coding	p	154.905	223.579	134.509	181.96	182.548	191.313	163.348	284.186	189.544	0.24015	0.328682	0.730646	0.464996	0.999991
1714	NC_005120.4	-	106713317	106713312	106713340	Tceal8	rna69098	gene38312	protein_coding	c	188.667	188.666	184.949	243.013	202.417	161.421	193.853	217.364	197.544	-0.0555707	0.279705	-0.198676	0.842516	0.999991
1715	NC_005113.4	+	3038238	3038219	3038404	Evi5	rna53214	gene29072	protein_coding	o	180.723	165.166	129.392	178.369	157.711	283.649	215.501	215.06	190.696	0.422675	0.311203	1.3582	0.174401	0.999991
1716	NC_005105.4	-	132771030	132771021	132771042	Wars	rna29999	gene16767	protein_coding	c	299.881	163.823	211.997	208.296	288.103	170.056	165.316	152.846	207.54	-0.184673	0.346767	-0.532555	0.594342	0.999991
1717	NC_005101.4	+	189085454	189085442	189085665	Adar	rna11792	gene6635	protein_coding	o	115.186	189.337	179.832	362.723	153.986	182.678	143.668	214.291	192.713	-0.287475	0.390831	-0.735548	0.462006	0.999991
1718	NC_005101.4	+	187282164	187282153	187282362	Hdgf	rna11534	gene6550	protein_coding	e	125.116	78.5547	217.115	135.273	151.502	170.721	226.326	394.02	187.328	0.761079	0.429491	1.77205	0.0763867	0.999991
1719	NC_005100.4	+	48038728	48038704	48038876	Pnldc1	rna839	gene539	protein_coding	o	141.003	205.451	200.301	190.34	135.359	216.556	250.926	162.063	187.75	0.0496354	0.32388	0.153252	0.878199	0.999991
1720	NC_005101.4	+	251765031	251765016	251765165	Ddah1	rna13453	gene7591	protein_coding	c	393.221	144.353	197.377	134.076	224.77	156.771	186.965	235.797	209.166	-0.103314	0.402062	-0.25696	0.797209	0.999991
1721	NC_005106.4	+	141068795	141068763	141068998	Tmbim6	rna34410	gene19290	protein_coding	o	210.512	196.051	148.398	184.354	263.266	177.363	133.827	259.608	196.673	0.175967	0.334048	0.52677	0.598353	0.999991
1722	NC_005115.4	+	70909442	70909425	70909546	Hgsnat	rna59465	gene32576	misc_RNA	o	293.923	183.294	152.053	171.186	268.234	215.228	110.211	215.828	201.245	0.022459	0.37548	0.0598141	0.952304	0.999991
1723	NC_005103.4	-	7222336	7222327	7222353	Agap3	rna19141	gene10813	protein_coding	o	65.5368	284.005	106.73	113.725	149.019	312.877	98.4025	243.478	171.722	0.489529	0.502624	0.973947	0.330083	0.999991
1724	NC_005120.4	-	72071010	72071010	72071010	-	-	-	-	u	329.67	135.624	250.742	221.465	147.777	398.57	61.9936	19.9698	195.726	-0.573688	0.656819	-0.873434	0.382427	0.999991
1725	NC_005104.4	-	164962922	164962878	164962941	Fbxo44	rna26854	gene15094	protein_coding	o	307.824	114.811	219.308	158.018	311.697	91.671	175.156	289.562	208.506	0.121457	0.454178	0.26742	0.789146	0.999991
1726	NC_005105.4	-	132023129	132023119	132023152	Setd3	rna29962	gene16748	protein_coding	o	105.256	228.279	105.999	141.259	219.803	311.549	130.875	203.538	180.82	0.571063	0.395195	1.44501	0.148454	0.999991
1727	NC_005107.4	-	40174779	40174775	40174782	LOC108351822	gene20004	gene20004	pseudogene	p	333.642	143.681	207.611	166.398	206.143	106.95	151.54	317.981	204.243	-0.115559	0.423982	-0.272557	0.785194	0.999991
1728	NC_005120.4	+	107510858	107510842	107510928	Plp1	rna69130	gene38332	protein_coding	c	65.5368	257.149	309.224	217.873	126.666	239.806	151.54	46.8523	176.831	-0.593576	0.531061	-1.11772	0.263688	0.999991
1729	NC_005108.4	+	81844363	81844352	81844491	Plcd4	rna40705	gene22509	protein_coding	o	313.782	169.866	152.053	153.23	229.737	210.578	161.38	218.9	201.191	0.0667138	0.346289	0.192654	0.84723	0.999991
1730	NC_005101.4	+	119312669	119312659	119312899	Usp13	rna10588	gene5955	protein_coding	c	377.333	174.566	152.784	156.821	234.704	135.514	206.645	233.493	208.983	-0.0803981	0.392536	-0.204817	0.837715	0.999991
1731	NC_005107.4	+	21665045	21665032	21665342	Ubl5	rna35147	gene19764	protein_coding	o	47.6631	190.68	310.686	172.383	76.993	259.735	159.412	157.454	171.876	-0.146927	0.518848	-0.28318	0.777039	0.999991
1732	NC_005111.4	-	23998411	23998399	23998443	Por	rna49759	gene27270	protein_coding	o	65.5368	207.465	185.681	269.349	142.81	250.435	171.22	160.527	181.628	-0.0107822	0.425232	-0.025356	0.979771	0.999991
1733	NC_005100.4	-	198641465	198641461	198641488	Tbc1d10b	rna6067	gene3443	protein_coding	c	142.989	222.907	173.984	152.033	161.437	247.777	153.508	205.075	182.464	0.146945	0.317854	0.462303	0.643864	0.999991
1734	NC_005112.4	-	30191299	30191298	30191299	-	-	-	-	u	158.877	171.209	172.522	312.445	161.437	401.227	89.5463	29.1866	187.056	-0.256845	0.602423	-0.426353	0.669851	0.999991
1735	NC_005102.4	+	139835720	139835705	139835891	Slc24a3	rna17379	gene9902	protein_coding	o	93.3403	174.566	176.177	219.07	111.764	261.063	207.629	206.611	181.278	0.244146	0.382068	0.639012	0.522815	0.999991
1736	NC_005103.4	+	153350445	153350404	153350602	Slc25a18	rna22035	gene12500	protein_coding	o	107.242	192.023	168.867	207.099	191.241	251.763	199.757	164.367	185.295	0.251186	0.325289	0.772196	0.439999	0.999991
1737	NC_005108.4	+	92895778	92895754	92896036	Cab39	rna41059	gene22657	protein_coding	o	162.849	194.708	168.867	222.662	187.515	180.685	239.118	183.569	192.497	0.0758595	0.283762	0.267335	0.789211	0.999991
1738	NC_005103.4	+	157457244	157457206	157457488	Mlf2	rna22222	gene12609	protein_coding	o	101.284	320.933	130.123	140.061	74.5093	248.442	152.524	215.06	172.867	-0.00689963	0.473254	-0.0145791	0.988368	0.999991
1739	NC_005118.4	-	25246910	25246898	25246923	Cc2d1a	rna64463	gene35430	protein_coding	o	262.147	171.88	216.384	190.34	294.312	162.749	169.252	150.542	202.201	-0.113733	0.33869	-0.335802	0.73702	0.999991
1740	NC_005109.4	+	82381298	82381282	82381473	Mrpl27	rna45166	gene24771	protein_coding	o	180.723	230.293	162.288	175.975	235.946	258.406	148.588	122.123	189.293	0.0282678	0.348315	0.0811558	0.935318	0.999991
1741	NC_005115.4	+	86625088	86625042	86625282	Arglu1	rna59903	gene32795	protein_coding	o	49.6491	251.778	161.557	193.931	81.9603	282.32	199.757	164.367	173.165	0.144094	0.498303	0.289169	0.772452	0.999991
1742	NC_005100.4	+	80161241	80161223	80161378	Opa3	rna2027	gene1309	protein_coding	p	170.793	190.008	144.012	141.259	293.07	224.528	97.4185	255.767	189.607	0.430144	0.380744	1.12975	0.258583	0.999991
1743	NC_005104.4	+	156074354	156074317	156074488	Rap1gap	rna26452	gene14897	protein_coding	o	69.5087	195.38	176.177	220.268	83.2021	255.749	216.485	203.538	177.539	0.194928	0.446408	0.436659	0.662358	0.999991
1744	NC_005115.4	+	8323292	8323275	8323576	Ncoa4	rna58171	gene31856	protein_coding	o	154.905	138.31	149.129	141.259	147.777	245.12	213.533	289.562	184.949	0.623268	0.312695	1.99321	0.0462382	0.999991
1745	NC_005107.4	-	69134222	69134203	69134239	Map2k1	rna36756	gene20622	protein_coding	o	91.3543	197.394	167.405	219.07	114.248	282.32	234.198	139.021	180.626	0.18562	0.408867	0.453988	0.649838	0.999991
1746	NC_005105.4	+	133682325	133682273	133682650	RGD1566401	rna30021	gene16774	lncRNA	i	107.242	192.694	149.86	149.638	155.228	290.292	184.997	204.307	179.282	0.472958	0.337293	1.40222	0.160851	0.999991
1747	NC_005100.4	+	70235744	70235635	70235917	Peg3	rna1563	gene1031	protein_coding	c	430.954	118.168	216.384	148.441	227.254	159.428	226.326	168.975	211.991	-0.217617	0.428021	-0.508427	0.611154	0.999991
1748	NC_005109.4	-	85094644	85094635	85094653	Kpnb1	rna45342	gene24865	protein_coding	p	351.516	155.095	193.722	140.061	295.554	147.471	165.316	205.843	206.822	-0.0401864	0.39683	-0.101269	0.919337	0.999991
1749	NC_005113.4	-	86733413	86733400	86733428	-	-	-	-	u	180.723	184.637	126.467	114.922	177.581	283.649	127.923	266.52	182.803	0.500568	0.366076	1.36739	0.171503	0.999991
1750	NC_005114.4	+	33559433	33559381	33559679	Pabpn1	rna56437	gene30920	protein_coding	c	154.905	188.666	319.458	112.528	213.593	133.521	93.4824	247.318	182.934	-0.178	0.433904	-0.410228	0.681639	0.999991
1751	NC_005104.4	+	156609052	156609028	156609332	Hp1bp3	rna26490	gene14903	protein_coding	o	97.3122	224.922	141.819	199.917	127.908	249.77	216.485	180.496	179.829	0.217777	0.372284	0.584977	0.558563	0.999991
1752	NC_005120.4	-	26314563	26314559	26314570	Arhgap6	rna68098	gene37539	protein_coding	c	212.498	145.695	139.626	210.691	237.188	199.949	209.597	215.828	196.384	0.291206	0.295309	0.986107	0.324081	0.999991
1753	NC_005101.4	+	121166565	121166504	121166674	Sox2	rna10623	gene5969	protein_coding	c	383.291	193.365	173.984	123.302	370.063	105.621	124.971	207.379	210.247	-0.110508	0.481468	-0.229523	0.818463	0.999991
1754	NC_005114.4	+	28035397	28035375	28035637	Rnase4	rna56231	gene30644	protein_coding	o	119.158	169.195	153.515	210.691	150.261	262.392	216.485	185.105	183.35	0.317682	0.326727	0.972316	0.330893	0.999991
1755	NC_005106.4	+	36642929	36642895	36643094	-	-	-	-	u	111.214	204.108	180.563	215.479	149.019	216.556	154.492	217.364	181.099	0.0476376	0.332638	0.143212	0.886123	0.999991
1756	NC_005106.4	+	77836952	77836929	77837112	Baalc	rna32594	gene18432	protein_coding	p	117.172	180.609	190.798	173.58	98.104	231.835	247.974	198.162	179.779	0.22615	0.368754	0.613283	0.53969	0.999991
1757	NC_005107.4	-	62323866	62323795	62323887	Mpi	rna36510	gene20504	protein_coding	p	160.863	153.752	145.474	197.523	238.43	166.071	181.061	284.954	191.016	0.405734	0.312537	1.29819	0.194221	0.999991
1758	NC_005100.4	+	193145096	193145063	193145386	Tnrc6a	rna5783	gene3328	protein_coding	c	188.667	156.438	180.563	211.888	203.659	170.721	214.517	214.291	192.593	0.124954	0.275604	0.453381	0.650274	0.999991
1759	NC_005106.4	-	144102676	144102673	144102687	Map3k12	rna34647	gene19398	protein_coding	c	285.979	191.351	166.674	179.566	294.312	179.356	161.38	145.933	200.569	-0.0736286	0.352233	-0.209034	0.834422	0.999991
1760	NC_005106.4	+	117730705	117730689	117730925	Kifc2	rna33319	gene18799	protein_coding	o	182.709	211.493	210.535	226.253	137.842	207.92	165.316	145.933	186	-0.338412	0.287107	-1.17869	0.23852	0.999991
1761	NC_005116.4	+	11538727	11538703	11538877	LOC108348510	rna60361	gene33040	lncRNA	i	111.214	243.721	198.839	177.172	170.13	182.678	119.067	224.276	178.387	-0.0772522	0.354664	-0.217818	0.827571	0.999991
1762	NC_005108.4	-	113579117	113579110	113579147	Ralbp1	rna41566	gene22907	protein_coding	c	141.003	229.621	153.515	174.778	163.921	207.92	225.342	169.743	183.23	0.129017	0.306027	0.421586	0.673327	0.999991
1763	NC_005111.4	-	22472355	22472349	22472361	Ufsp1	rna49669	gene27230	protein_coding	o	107.242	243.721	130.854	146.047	152.744	231.835	143.668	251.927	176.005	0.308152	0.374247	0.823392	0.410285	0.999991
1764	NC_005103.4	+	153328610	153328604	153328806	Cecr2	rna22031	gene12498	protein_coding	p	176.751	214.179	240.507	198.72	199.933	184.671	165.316	112.138	186.527	-0.332272	0.309624	-1.07315	0.283205	0.999991
1765	NC_005106.4	+	83358434	83358423	83358770	Eny2	rna32725	gene18476	protein_coding	o	216.47	173.895	180.563	197.523	187.515	190.649	213.533	169.743	191.236	-0.00905856	0.268363	-0.0337549	0.973073	0.999991
1766	NC_005103.4	+	57004795	57004782	57004978	Tspan33	rna19835	gene11231	protein_coding	c	172.779	181.951	175.446	177.172	203.659	183.342	194.837	207.379	187.071	0.156509	0.256797	0.609465	0.542217	0.999991
1767	NC_005115.4	+	19884511	19884480	19884628	Dda1	rna58529	gene32045	protein_coding	c	258.175	146.367	195.184	229.844	224.77	322.177	124.971	40.7077	192.775	-0.216495	0.518198	-0.417784	0.676105	0.999991
1768	NC_005109.4	-	104521694	104521683	104521712	LOC100360679	rna46415	gene25378	protein_coding	o	144.975	212.836	126.467	122.105	141.568	306.234	83.6421	251.927	173.719	0.370445	0.435348	0.850918	0.394815	0.999991
1769	NC_005110.4	-	65741789	65741779	65741812	-	-	-	-	u	154.905	204.779	223.694	183.157	139.084	184.671	212.549	157.454	182.537	-0.148366	0.297623	-0.498502	0.61813	0.999991
1770	NC_005108.4	+	93273666	93273658	93273864	Armc9	rna41083	gene22665	protein_coding	i	196.61	141.667	154.977	214.282	172.613	213.899	204.677	215.828	189.319	0.197599	0.290704	0.679723	0.49668	0.999991
1771	NC_005101.4	-	77586423	77586385	77586459	Basp1	rna10084	gene5636	protein_coding	o	123.13	219.55	193.722	128.09	194.966	203.271	161.38	202.002	178.264	0.187731	0.319774	0.587075	0.557153	0.999991
1772	NC_005120.4	+	48805522	48805509	48805778	Tmem47	rna68404	gene37737	protein_coding	o	43.6912	188.666	173.253	148.441	99.3458	370.67	149.572	150.542	165.523	0.469309	0.510047	0.92013	0.357505	0.999991
1773	NC_005106.4	-	12663963	12663959	12663966	Ptbp1	rna31198	gene17587	protein_coding	c	305.838	130.253	144.743	181.96	288.103	219.878	132.843	195.09	199.839	0.140717	0.387649	0.363	0.716605	0.999991
1774	NC_005107.4	-	79582080	79582072	79582090	Prtg	rna37079	gene20768	protein_coding	i	528.266	126.896	103.806	272.94	335.292	73.0711	261.751	137.484	229.938	-0.349972	0.568747	-0.615339	0.538331	0.999991
1775	NC_005100.4	+	266414057	266414042	266414199	Wbp1l	rna8723	gene4788	protein_coding	c	353.502	175.237	115.502	86.1917	273.201	217.885	118.083	238.102	197.213	0.222443	0.466518	0.476816	0.633493	0.999991
1776	NC_005106.4	-	2978758	2978754	2978773	Pa2g4	rna30669	gene17219	protein_coding	p	154.905	157.781	173.253	201.114	218.561	195.963	233.214	169.743	188.067	0.248283	0.280738	0.884395	0.376483	0.999991
1777	NC_005117.4	+	24228645	24228626	24229037	-	-	-	-	u	222.428	171.209	100.151	368.709	280.652	135.514	296.192	78.3431	206.65	-0.125287	0.501996	-0.249577	0.802914	0.999991
1778	NC_005106.4	-	126421478	126421470	126421513	Wnt7b	rna33886	gene19038	protein_coding	p	216.47	199.408	184.218	125.696	182.548	199.285	166.3	203.538	184.683	0.0534653	0.298914	0.178865	0.858044	0.999991
1779	NC_005110.4	-	31104812	31104805	31104830	Synj1	rna47169	gene25842	protein_coding	p	75.4666	200.08	172.522	280.123	116.731	259.735	235.182	86.7919	178.329	-0.0632826	0.47405	-0.133494	0.893803	0.999991
1780	NC_005115.4	-	14371536	14371524	14371556	Ghitm	rna58365	gene31963	protein_coding	c	142.989	194.708	137.433	192.734	173.855	243.792	159.412	202.002	180.866	0.221945	0.306272	0.724667	0.468656	0.999991
1781	NC_005102.4	-	148487056	148487051	148487069	Pdrg1	rna17707	gene10089	protein_coding	c	162.849	218.879	220.77	167.595	151.502	131.528	159.412	237.334	181.234	-0.183983	0.320616	-0.57384	0.566076	0.999991
1782	NC_005101.4	-	115755387	115755379	115755393	Slc7a14	rna10484	gene5912	protein_coding	i	59.5789	189.337	203.956	191.537	217.319	187.328	147.604	215.828	176.561	0.243173	0.401556	0.605576	0.544796	0.999991
1783	NC_005100.4	-	54422629	54422617	54422659	LOC108349805	rna968	gene615	lncRNA	c	200.582	175.909	171.791	192.734	264.508	146.806	144.652	228.885	190.733	0.0828418	0.322224	0.257094	0.797106	0.999991
1784	NC_005102.4	+	160115183	160115169	160115311	Pkig	rna18227	gene10332	protein_coding	o	115.186	197.394	157.171	120.908	253.332	217.885	135.795	229.653	178.415	0.493967	0.340515	1.45065	0.146879	0.999991
1785	NC_005104.4	-	74000112	74000109	74000125	Frrs1l	rna24329	gene13803	protein_coding	c	272.077	177.252	128.661	172.383	228.495	229.178	153.508	176.656	192.276	0.079188	0.338771	0.233751	0.815178	0.999991
1786	NC_005118.4	+	52112636	52112596	52112971	Necab2	rna65362	gene35876	protein_coding	o	133.06	178.594	166.674	186.749	186.273	191.978	142.684	256.535	180.318	0.222436	0.311107	0.714982	0.47462	0.999991
1787	NC_005100.4	+	31571205	31571173	31571387	Sdha	rna528	gene354	protein_coding	p	85.3965	216.193	165.943	235.83	85.6858	209.913	180.077	211.219	173.782	-0.036997	0.417415	-0.0886335	0.929373	0.999991
1788	NC_005106.4	+	71686044	71686021	71686357	Sdc2	rna32482	gene18354	protein_coding	o	127.102	196.051	162.288	238.224	189.999	206.592	202.709	140.557	182.94	0.0271433	0.321187	0.0845095	0.932651	0.999991
1789	NC_005103.4	-	82834182	82834150	82834213	Jazf1	rna20544	gene11671	protein_coding	o	246.26	156.438	173.253	241.815	257.057	151.456	227.31	129.036	197.828	-0.0948147	0.349891	-0.270983	0.786404	0.999991
1790	NC_005107.4	-	103187701	103187639	103187706	Chst2	rna37478	gene20993	protein_coding	c	154.905	143.681	84.799	219.07	192.482	237.813	223.374	228.885	185.626	0.556905	0.348898	1.59618	0.110448	0.999991
1791	NC_005119.4	+	5008263	5008235	5008462	Vars	rna66211	gene36471	protein_coding	o	186.681	175.237	222.232	178.369	139.084	181.349	175.156	197.394	181.938	-0.136612	0.281548	-0.485219	0.627521	0.999991
1792	NC_005120.4	-	21312611	21312603	21312635	LOC685431	rna68016	gene37483	transcribed_pseudogene	c	361.445	132.267	404.988	220.268	155.228	115.585	192.869	10.753	199.175	-1.23916	0.623316	-1.98801	0.0468105	0.999991
1793	NC_005100.4	+	100468889	100468851	100468958	Lrrc4b	rna3283	gene1923	protein_coding	o	93.3403	219.55	139.626	195.128	211.11	257.077	198.773	105.994	177.575	0.248435	0.394852	0.629186	0.529228	0.999991
1794	NC_005104.4	+	49333060	49333044	49333218	Cnr1	rna23795	gene13480	protein_coding	o	156.891	149.053	135.24	179.566	186.273	213.235	247.974	204.307	184.067	0.459828	0.277902	1.65464	0.0979972	0.999991
1795	NC_005112.4	-	34367608	34367586	34367637	LOC102547127	gene27910	gene27910	pseudogene	c	254.203	126.896	258.783	81.4032	758.754	59.1212	30.5048	119.051	211.09	0.422122	0.75556	0.558688	0.576375	0.999991
1796	NC_005113.4	+	71112135	71112119	71112277	Ldb2	rna54413	gene29766	protein_coding	c	168.807	155.095	173.253	168.792	221.044	176.699	227.31	195.858	185.857	0.300752	0.267794	1.12307	0.261407	0.999991
1797	NC_005107.4	+	79691699	79691677	79691894	Ccpg1	rna37091	gene20772	protein_coding	c	192.639	173.895	156.439	154.427	216.077	233.828	161.38	179.728	183.552	0.227397	0.285298	0.797052	0.425421	0.999991
1798	NC_005108.4	-	43268146	43268125	43268160	Actr1b	rna39840	gene22107	protein_coding	c	129.088	182.623	153.515	209.494	100.588	185.999	209.597	251.159	177.758	0.147398	0.36175	0.407457	0.683672	0.999991
1799	NC_005108.4	-	80150218	80150184	80150245	-	-	-	-	u	301.867	164.495	157.171	177.172	244.639	146.142	197.789	188.177	197.181	-0.0369686	0.341855	-0.108141	0.913884	0.999991
1800	NC_005104.4	-	151487574	151487552	151487593	Wdtc1	rna26216	gene14779	protein_coding	o	115.186	192.023	155.708	144.85	163.921	255.085	162.364	202.002	173.892	0.361004	0.318375	1.1339	0.256838	0.999991
1801	NC_005100.4	-	219362577	219362563	219362582	Aip	rna7035	gene3905	protein_coding	c	172.779	138.31	191.529	198.72	122.94	237.813	200.741	183.569	180.8	0.0918076	0.322345	0.284812	0.775788	0.999991
1802	NC_005116.4	+	80890934	80890923	80891547	Vim	rna61968	gene33998	protein_coding	o	154.905	216.193	144.012	175.975	125.424	255.085	123.003	204.307	174.863	0.0364242	0.355627	0.102422	0.918421	0.999991
1803	NC_005100.4	-	64329406	64329399	64329419	Cacng8	rna1316	gene834	protein_coding	p	162.849	156.438	220.77	245.407	207.384	199.949	198.773	98.3129	186.235	-0.159986	0.353419	-0.45268	0.650779	0.999991
1804	NC_005120.4	-	64248286	64248264	64248331	Arhgef9	rna68532	gene37862	protein_coding	p	111.214	182.623	178.37	280.123	136.6	193.971	268.639	106.762	182.288	-0.094998	0.405624	-0.234202	0.814828	0.999991
1805	NC_005106.4	-	14323298	14323283	14323312	Akap8	rna31304	gene17649	protein_coding	o	236.33	174.566	138.164	216.676	249.606	162.749	165.316	195.858	192.408	0.0191193	0.319319	0.0598754	0.952255	0.999991
1806	NC_005117.4	+	28055968	28055948	28056204	Ctnna1	rna62674	gene34376	protein_coding	o	107.242	159.795	166.674	165.201	153.986	231.17	223.374	198.93	175.796	0.425306	0.306285	1.38859	0.164956	0.999991
1807	NC_005106.4	-	116605555	116605524	116605588	Ly6h	rna33137	gene18737	protein_coding	o	192.639	154.424	181.294	122.105	185.032	203.935	128.907	270.361	179.837	0.281174	0.338764	0.829999	0.40654	0.999991
1808	NC_005107.4	-	70471580	70471566	70471594	Hacd3	rna36812	gene20641	protein_coding	c	87.3824	211.493	160.095	164.004	58.3657	272.356	197.789	185.873	167.17	0.194942	0.46231	0.421668	0.673267	0.999991
1809	NC_005111.4	+	15971208	15971173	15971638	Gna12	rna49286	gene27017	protein_coding	o	131.074	159.795	163.019	189.143	142.81	264.385	168.268	187.409	175.738	0.246954	0.319405	0.77317	0.439422	0.999991
1810	NC_005117.4	+	65508975	65508958	65509296	Tcf4	rna63464	gene34870	protein_coding	p	109.228	186.651	259.514	138.864	57.1238	230.506	186.965	173.584	167.805	-0.101357	0.452306	-0.224089	0.822688	0.999991
1811	NC_005103.4	-	119747974	119747970	119748001	Cnbp	rna21292	gene12139	protein_coding	c	148.947	185.98	174.715	190.34	108.039	194.635	164.332	242.71	176.212	0.0211476	0.334097	0.0632979	0.949529	0.999991
1812	NC_005106.4	+	125277641	125277613	125277779	LOC102554986	rna33841	gene19018	lncRNA	x	287.965	160.466	118.426	148.441	214.835	225.856	168.268	195.858	190.015	0.181786	0.35338	0.51442	0.606958	0.999991
1813	NC_005116.4	+	77218375	77218354	77218552	Optn	rna61883	gene33951	protein_coding	o	226.4	134.953	191.529	245.407	289.345	176.035	194.837	100.617	194.89	-0.069055	0.386679	-0.178585	0.858264	0.999991
1814	NC_005100.4	-	143700103	143700075	143700115	Tm6sf1	rna4372	gene2458	protein_coding	i	123.13	160.466	224.425	210.691	90.653	197.292	245.022	158.222	176.238	-0.0583775	0.383129	-0.15237	0.878895	0.999991
1815	NC_005109.4	-	47426596	47426588	47426612	-	-	-	-	u	49.6491	219.55	107.461	124.499	86.9276	358.048	124.971	207.379	159.811	0.627605	0.518609	1.21017	0.226213	0.999991
1816	NC_005100.4	+	42954122	42954076	42954236	-	-	-	-	u	129.088	181.951	187.874	162.806	150.261	243.792	95.4504	225.812	172.129	0.111004	0.369917	0.300078	0.764118	0.999991
1817	NC_005114.4	+	36926186	36926176	36926416	Mphosph8	rna56655	gene31058	protein_coding	c	315.768	212.836	206.88	175.975	290.586	112.928	151.54	110.602	197.139	-0.45469	0.399788	-1.13733	0.255401	0.999991
1818	NC_005100.4	-	86920677	86920673	86920702	Mrps12	rna2525	gene1572	protein_coding	c	166.821	145.695	149.129	152.033	194.966	196.628	222.39	227.349	181.876	0.459181	0.263498	1.74264	0.0813971	0.999991
1819	NC_005102.4	-	60110943	60110938	60110943	-	-	-	-	u	109.228	247.078	78.2197	108.937	263.266	236.485	87.5782	250.391	172.648	0.619572	0.464785	1.33303	0.182522	0.999991
1820	NC_005104.4	-	65834752	65834748	65834775	-	-	-	-	u	379.319	173.895	163.75	204.705	193.724	94.9924	135.795	246.55	199.091	-0.45153	0.415731	-1.08611	0.27743	0.999991
1821	NC_005107.4	+	111092847	111092800	111092939	Cep63	rna37691	gene21081	protein_coding	i	240.302	193.365	180.563	171.186	173.855	162.749	84.6261	254.231	182.61	-0.213193	0.37454	-0.569213	0.569212	0.999991
1822	NC_005104.4	-	153565826	153565814	153565841	-	-	-	-	u	99.2982	203.437	164.481	199.917	114.248	235.156	211.565	149.774	172.234	0.0870629	0.369766	0.235454	0.813857	0.999991
1823	NC_005102.4	-	91964439	91964435	91964463	-	-	-	-	u	83.4105	206.122	114.04	159.215	113.006	277.67	155.476	225.044	166.748	0.450468	0.407657	1.10502	0.269152	0.999991
1824	NC_005104.4	+	154286553	154286534	154286658	Fuca1	rna26373	gene14857	protein_coding	o	188.667	164.495	144.012	190.34	248.364	231.835	140.716	160.527	183.619	0.187558	0.318612	0.588673	0.556081	0.999991
1825	NC_005119.4	+	42971380	42971362	42971500	Marcks	rna67352	gene37067	protein_coding	c	307.824	201.422	126.467	141.259	85.6858	220.542	274.543	131.34	186.135	-0.118262	0.443418	-0.266705	0.789696	0.999991
1826	NC_005112.4	-	48674544	48674513	48674561	LOC100363803	gene28032	gene28032	pseudogene	o	69.5087	229.621	128.661	150.835	29.8037	261.063	190.901	235.797	162.024	0.307917	0.559656	0.550189	0.582189	0.999991
1827	NC_005107.4	-	23028301	23028237	23028307	Elavl3	rna35289	gene19821	protein_coding	p	254.203	263.192	197.377	117.316	229.737	67.7568	153.508	202.77	185.733	-0.350372	0.432547	-0.810022	0.417928	0.999991
1828	NC_005100.4	-	81852428	81852411	81852448	Atp1a3	rna2217	gene1406	protein_coding	o	174.765	193.365	135.24	164.004	214.835	184.006	179.093	202.77	181.01	0.226518	0.279001	0.811888	0.416856	0.999991
1829	NC_005102.4	-	127532200	127532193	127532227	Tmx4	rna17203	gene9814	protein_coding	c	333.642	139.653	287.293	99.3598	175.097	124.885	125.955	217.364	187.906	-0.414752	0.433804	-0.956082	0.339031	0.999991
1830	NC_005110.4	-	74717598	74717591	74717619	Opa1	rna48240	gene26427	protein_coding	o	109.228	191.351	138.895	177.172	180.064	223.863	221.406	158.99	175.121	0.340342	0.315861	1.07751	0.281254	0.999991
1831	NC_005109.4	+	109183317	109183297	109183606	Baiap2	rna46674	gene25507	protein_coding	o	246.26	136.296	170.329	180.763	165.162	201.278	175.156	203.538	184.848	0.0335229	0.304449	0.11011	0.912322	0.999991
1832	NC_005102.4	-	24600601	24600588	24600652	LOC100362366	rna14831	gene8338	transcribed_pseudogene	c	71.4947	197.394	115.502	89.783	23.5946	313.541	118.083	319.517	156.114	0.70585	0.617047	1.14392	0.252658	0.999991
1833	NC_005113.4	-	21068556	21068517	21068564	Rufy3	rna53758	gene29346	protein_coding	o	63.5508	171.209	170.329	181.96	196.208	224.528	211.565	158.99	172.293	0.420155	0.373836	1.1239	0.261054	0.999991
1834	NC_005107.4	-	82582348	82582315	82582358	Scg3	rna37157	gene20810	protein_coding	o	95.3263	234.993	168.867	153.23	109.28	248.442	156.46	161.295	165.987	0.0449527	0.386995	0.116158	0.907527	0.999991
1835	NC_005102.4	+	6298562	6298492	6298723	-	-	-	-	u	107.242	169.866	195.184	135.273	119.215	193.306	264.703	187.409	171.525	0.325193	0.356399	0.912441	0.361537	0.999991
1836	NC_005114.4	+	67644551	67644512	67644806	Pcdh17	rna57409	gene31439	protein_coding	c	95.3263	208.136	233.197	129.287	62.0911	152.785	188.933	252.695	165.306	-0.0247527	0.458534	-0.0539823	0.956949	0.999991
1837	NC_005106.4	-	116949884	116949866	116949896	Pycrl	rna33182	gene18750	protein_coding	o	142.989	173.895	160.095	172.383	147.777	215.228	174.172	208.915	174.432	0.200183	0.285346	0.701544	0.482964	0.999991
1838	NC_005101.4	-	166226746	166226728	166226755	B3galnt1	rna11237	gene6374	protein_coding	o	121.144	120.182	278.521	238.224	140.326	144.149	258.799	132.108	179.182	-0.170927	0.406589	-0.420393	0.674199	0.999991
1839	NC_005109.4	-	72503352	72503340	72503373	Appbp2	rna44835	gene24633	protein_coding	c	160.863	149.724	176.177	213.085	196.208	198.621	166.3	181.264	180.28	0.0856477	0.279171	0.306793	0.759001	0.999991
1840	NC_005112.4	-	49283176	49283136	49283214	Cntn2	rna51228	gene28050	protein_coding	c	212.498	165.166	201.763	203.508	178.822	215.892	151.54	125.195	181.798	-0.218326	0.303751	-0.718768	0.472284	0.999991
1841	NC_005100.4	+	98951434	98951424	98951461	Vom2r38	rna3137	gene1855	protein_coding	i	69.5087	283.334	161.557	203.508	194.966	150.792	221.406	96.0087	172.635	-0.12393	0.445666	-0.278078	0.780953	0.999991
1842	NC_005104.4	-	136129459	136129450	136129481	Rnf220	rna25463	gene14434	protein_coding	c	55.607	167.852	152.053	222.662	136.6	293.613	190.901	125.963	168.156	0.315733	0.449762	0.702	0.482679	0.999991
1843	NC_005100.4	+	100997200	100997183	100997418	Irf3	rna3405	gene1954	protein_coding	o	234.344	158.452	160.826	161.609	172.613	140.164	169.252	267.288	183.069	0.074283	0.331434	0.224126	0.822659	0.999991
1844	NC_005103.4	+	140881864	140881836	140882166	Arl8b	rna21634	gene12341	protein_coding	o	107.242	210.151	208.342	149.638	116.731	216.556	173.188	158.222	167.509	-0.0291812	0.351515	-0.0830156	0.933839	0.999991
1845	NC_005106.4	+	59325927	59325911	59326083	Ptprr	rna32119	gene18174	protein_coding	o	218.456	152.41	129.392	167.595	295.554	148.135	178.109	217.364	188.377	0.333876	0.341014	0.97907	0.327545	0.999991
1846	NC_005106.4	+	144869930	144869903	144870177	Hnrnpa1	rna34697	gene19425	protein_coding	o	63.5508	235.664	116.233	196.325	88.1694	248.442	144.652	215.828	163.608	0.184516	0.46605	0.395915	0.692168	0.999991
1847	NC_005117.4	+	44897602	44897579	44897762	Hsd17b4	rna63039	gene34624	protein_coding	o	115.186	177.923	159.364	180.763	114.248	209.913	201.725	209.683	171.101	0.213532	0.332218	0.642748	0.520388	0.999991
1848	NC_005104.4	-	128234510	128234483	128234526	Zfyve9	rna25200	gene14304	protein_coding	c	190.653	210.151	207.611	152.033	167.646	154.778	159.412	175.12	177.175	-0.213899	0.275294	-0.776982	0.43717	0.999991
1849	NC_005104.4	-	168139746	168139736	168139790	Camta1	rna27001	gene15166	protein_coding	c	252.217	200.751	173.253	143.653	160.195	104.292	257.815	189.713	185.236	-0.110407	0.366272	-0.301435	0.763082	0.999991
1850	NC_005114.4	-	10493735	10493711	10493735	-	-	-	-	u	434.926	216.193	208.342	99.3598	183.79	276.342	69.8658	26.1144	189.367	-0.782382	0.61795	-1.26609	0.20548	0.999991
1851	NC_005106.4	+	12317586	12317568	12317717	Gamt	rna31124	gene17558	protein_coding	c	146.961	204.779	177.639	134.076	121.699	185.999	133.827	251.159	169.517	0.0611926	0.347992	0.175845	0.860416	0.999991
1852	NC_005100.4	+	85373099	85373082	85373267	Med29	rna2483	gene1531	protein_coding	c	293.923	208.136	135.24	132.879	339.018	168.728	114.147	135.18	190.906	-0.0227306	0.43588	-0.0521488	0.95841	0.999991
1853	NC_005103.4	+	66354691	66354670	66355112	Luc7l2	rna20044	gene11351	protein_coding	c	250.231	157.781	106.73	191.537	178.822	197.956	189.917	208.147	185.14	0.145008	0.335205	0.432594	0.66531	0.999991
1854	NC_005107.4	+	22959560	22959537	22959697	Plppr2	rna35270	gene19815	protein_coding	o	117.172	174.566	203.225	226.253	119.215	284.313	144.652	89.0961	169.811	-0.179218	0.420121	-0.426587	0.66968	0.999991
1855	NC_005102.4	+	23308812	23308797	23308990	Arpc5l	rna14813	gene8325	protein_coding	c	59.5789	194.708	159.364	210.691	106.797	246.449	169.252	175.888	165.341	0.156528	0.430147	0.363894	0.715937	0.999991
1856	NC_005107.4	-	90422293	90422223	90422321	Phip	rna37255	gene20871	protein_coding	c	319.74	222.236	101.613	130.485	233.463	115.585	111.195	271.897	188.277	-0.0751812	0.458878	-0.163837	0.869859	0.999991
1857	NC_005114.4	-	33259039	33259032	33259056	Psmb5	rna56406	gene30906	protein_coding	c	131.074	197.394	131.585	153.23	135.359	248.442	108.243	236.565	167.736	0.248859	0.372197	0.668621	0.503737	0.999991
1858	NC_005100.4	-	100836991	100836978	100837005	Tbc1d17	rna3354	gene1943	protein_coding	o	141.003	151.738	214.191	183.157	187.515	209.913	134.811	167.439	173.721	0.0165132	0.306762	0.0538309	0.95707	0.999991
1859	NC_005110.4	-	30309098	30309075	30309103	-	-	-	-	u	315.768	248.421	258.052	123.302	161.437	227.185	72.8178	25.3463	179.041	-0.956636	0.557959	-1.71453	0.086432	0.999991
1860	NC_005117.4	-	40702031	40702022	40702057	Cdo1	rna62994	gene34588	protein_coding	c	176.751	163.823	135.971	152.033	223.528	178.692	147.604	245.014	177.927	0.341741	0.302311	1.13043	0.258297	0.999991
1861	NC_005113.4	+	42210555	42210515	42210679	Atp8a1	rna54117	gene29561	protein_coding	o	113.2	204.108	125.736	164.004	110.522	235.156	185.981	199.698	167.301	0.266571	0.356631	0.747471	0.45478	0.999991
1862	NC_005111.4	-	39164289	39164270	39164307	Rnf34	rna50158	gene27473	protein_coding	o	176.751	143.681	120.619	190.34	207.384	216.556	210.581	175.12	180.129	0.365298	0.293462	1.24479	0.213209	0.999991
1863	NC_005120.4	-	63803192	63803177	63803209	Maged1	rna68526	gene37852	protein_coding	o	35.7474	165.166	100.882	65.8408	55.882	292.284	130.875	374.05	152.591	1.20573	0.578068	2.08579	0.0369976	0.999991
1864	NC_005101.4	+	81670258	81670245	81670308	-	-	-	-	u	75.4666	135.624	125.736	210.691	356.403	72.4068	269.623	232.725	184.834	0.760122	0.482472	1.57547	0.115147	0.999991
1865	NC_005108.4	-	79601935	79601917	79601966	Pecr	rna40611	gene22466	protein_coding	o	164.835	145.695	146.936	216.676	166.404	193.971	222.39	174.352	178.907	0.170952	0.294882	0.579731	0.562096	0.999991
1866	NC_005119.4	-	56190556	56190508	56190564	LOC103694460	rna67567	gene37201	lncRNA	c	305.838	128.239	148.398	147.244	398.625	164.078	122.019	152.078	195.815	0.201991	0.457578	0.441435	0.658898	0.999991
1867	NC_005108.4	-	89050409	89050384	89050413	Sphkap	rna40976	gene22619	protein_coding	o	174.765	170.538	168.136	246.604	214.835	139.499	169.252	172.816	182.056	-0.12803	0.303389	-0.421999	0.673026	0.999991
1868	NC_005109.4	-	64865812	64865798	64865850	Sez6	rna44488	gene24440	protein_coding	c	125.116	140.324	214.191	214.282	113.006	292.949	120.051	122.123	167.755	-0.0974206	0.412182	-0.236354	0.813158	0.999991
1869	NC_005106.4	-	36643914	36643894	36643940	Nudt4	rna31886	gene18021	protein_coding	o	89.3684	217.536	122.081	118.514	189.999	267.042	86.5942	213.523	163.082	0.461653	0.425979	1.08375	0.278477	0.999991
1870	NC_005101.4	-	179585280	179585274	179585295	Gria2	rna11346	gene6443	protein_coding	c	164.835	143.681	113.309	169.989	136.6	250.435	209.597	200.466	173.614	0.437825	0.32063	1.36552	0.172091	0.999991
1871	NC_005104.4	-	164956284	164956274	164956330	Fbxo6	rna26847	gene15093	protein_coding	o	180.723	181.28	192.26	193.931	175.097	201.942	134.811	143.629	175.459	-0.190507	0.284307	-0.670075	0.50281	0.999991
1872	NC_005106.4	-	11429862	11429788	11429870	Zbtb7a	rna30992	gene17506	protein_coding	c	142.989	114.811	205.418	213.085	141.568	198.621	191.885	188.177	174.569	0.0917939	0.328073	0.279798	0.779633	0.999991
1873	NC_005109.4	-	84686762	84686741	84686812	Nfe2l1	rna45298	gene24844	protein_coding	o	301.867	138.981	184.949	202.311	224.77	95.6567	154.492	222.74	190.721	-0.242621	0.389259	-0.62329	0.533094	0.999991
1874	NC_005118.4	-	43358071	43358052	43358091	Cog4	rna65216	gene35794	protein_coding	c	256.189	147.71	154.977	204.705	204.901	153.449	160.396	200.466	185.349	-0.0782893	0.315402	-0.248221	0.803964	0.999991
1875	NC_005104.4	+	129024407	129024391	129024607	Ttc39a	rna25216	gene14316	protein_coding	o	137.032	166.509	173.253	210.691	156.47	195.299	225.342	131.34	174.492	0.0404746	0.315629	0.128235	0.897963	0.999991
1876	NC_005106.4	-	124959565	124959549	124959572	Sult4a1	rna33832	gene19013	protein_coding	c	208.526	157.109	194.453	154.427	187.515	152.121	173.188	199.698	178.38	-0.00111439	0.283409	-0.00393207	0.996863	0.999991
1877	NC_005117.4	+	2313020	2312991	2313039	-	-	-	-	u	99.2982	185.98	151.322	195.128	183.79	233.828	143.668	158.222	168.905	0.18167	0.338106	0.537316	0.59105	0.999991
1878	NC_005101.4	-	43002039	43002014	43002062	Gpbp1	rna9686	gene5367	protein_coding	o	87.3824	201.422	134.509	179.566	131.633	219.213	187.949	187.409	166.135	0.262251	0.355295	0.738121	0.460441	0.999991
1879	NC_005104.4	-	127648554	127648537	127648581	Scp2	rna25183	gene14291	protein_coding	c	27.8035	187.323	105.268	260.969	85.6858	231.17	258.799	163.599	165.077	0.342582	0.55903	0.612815	0.539999	0.999991
1880	NC_005106.4	+	134693809	134693786	134693987	Pphln1	rna34121	gene19146	protein_coding	o	192.639	175.909	180.563	294.488	158.953	156.771	237.15	67.5901	183.008	-0.444063	0.409112	-1.08543	0.277731	0.999991
1881	NC_005100.4	-	82463826	82463818	82463836	Tmem91	rna2305	gene1431	protein_coding	c	208.526	175.909	189.336	213.085	276.926	174.042	145.636	82.9515	183.301	-0.213879	0.386664	-0.553139	0.580168	0.999991
1882	NC_005107.4	+	22628304	22628281	22628424	RGD1309188	rna35226	gene19805	protein_coding	c	190.653	141.667	189.336	168.792	285.619	148.135	125.955	196.626	180.848	0.130647	0.348153	0.375257	0.707469	0.999991
1883	NC_005109.4	+	14259394	14259344	14259631	Nme3	rna42401	gene23324	protein_coding	o	170.793	187.323	132.316	138.864	121.699	235.82	132.843	224.276	167.992	0.188412	0.346671	0.543489	0.586793	0.999991
1884	NC_005108.4	-	112000056	112000025	112000065	Pja2	rna41544	gene22892	protein_coding	c	25.8175	52.3698	586.283	241.815	18.6273	29.2284	348.345	26.1144	166.075	-1.10313	1.25574	-0.878476	0.379686	0.999991
1885	NC_005116.4	-	9834246	9834235	9834261	Prelid1	rna60273	gene33002	protein_coding	o	77.4526	173.223	266.093	134.076	120.457	201.278	158.428	159.758	161.346	-0.0325787	0.403182	-0.080804	0.935598	0.999991
1886	NC_005104.4	+	60430117	60430097	60430270	Zcchc7	rna24071	gene13640	protein_coding	o	180.723	156.438	149.129	179.566	131.633	166.071	196.805	235.797	174.52	0.139078	0.306192	0.454219	0.649671	0.999991
1887	NC_005107.4	+	64116836	64116810	64117070	Adpgk	rna36584	gene20543	protein_coding	o	166.821	172.552	142.55	260.969	152.744	222.535	134.811	147.469	175.056	-0.172518	0.335348	-0.514445	0.606941	0.999991
1888	NC_005102.4	-	171294591	171294585	171294607	Pmepa1	rna18628	gene10545	protein_coding	p	129.088	163.823	159.364	158.018	170.13	175.371	123.987	271.897	168.96	0.278822	0.334361	0.833894	0.404341	0.999991
1889	NC_005110.4	+	87380709	87380684	87381027	Aifm3	rna48662	gene26646	protein_coding	o	266.119	155.767	138.164	126.893	252.09	205.263	98.4025	202.77	180.684	0.150386	0.393776	0.381908	0.70253	0.999991
1890	NC_005109.4	-	10829866	10829856	10829892	Nudt16l1	rna42046	gene23149	protein_coding	o	162.849	173.895	164.481	146.047	176.339	195.963	187.949	169.743	172.158	0.172592	0.264178	0.653317	0.513552	0.999991
1891	NC_005101.4	+	95173757	95173736	95173970	-	-	-	-	u	123.13	233.65	139.626	134.076	113.006	165.406	175.156	234.261	164.789	0.121531	0.361754	0.33595	0.736908	0.999991
1892	NC_005118.4	-	11512310	11512204	11512327	Gnao1	rna64118	gene35232	protein_coding	p	97.3122	83.926	356.741	366.315	84.4439	75.0639	301.112	62.2136	178.391	-0.793407	0.606852	-1.30742	0.191072	0.999991
1893	NC_005100.4	+	174695718	174695678	174695863	Ipo7	rna5386	gene3128	protein_coding	c	127.102	177.923	141.088	185.551	130.391	170.721	203.693	221.972	169.805	0.200611	0.314982	0.636896	0.524192	0.999991
1894	NC_005101.4	-	171985672	171985658	171985676	-	-	-	-	u	133.06	91.9829	200.301	403.425	233.463	56.464	337.521	79.8792	192.012	-0.231004	0.588559	-0.392491	0.694696	0.999991
1895	NC_005102.4	+	61241373	61241359	61241515	-	-	-	-	u	454.786	137.639	123.543	174.778	274.443	149.464	99.3865	182.801	199.605	-0.327931	0.482845	-0.679164	0.497034	0.999991
1896	NC_005108.4	-	99813325	99813295	99813339	Cops9	rna41352	gene22786	protein_coding	o	172.779	128.239	159.364	202.311	219.803	187.992	160.396	188.945	177.479	0.195675	0.294586	0.664236	0.506539	0.999991
1897	NC_005120.4	-	10512676	10512675	10512690	Usp9x	rna67693	gene37299	protein_coding	c	65.5368	197.394	95.7644	166.398	96.8622	266.377	203.693	192.785	160.601	0.52794	0.438833	1.20306	0.228955	0.999991
1898	NC_005100.4	+	78880366	78880343	78880961	Pnmal2	rna1951	gene1261	protein_coding	p	87.3824	188.666	136.702	113.725	93.1367	245.785	89.5463	299.547	156.811	0.464647	0.465365	0.998457	0.318058	0.999991
1899	NC_005101.4	-	41560930	41560882	41560940	-	-	-	-	u	142.989	190.008	304.107	191.537	153.986	193.306	118.083	51.4607	168.185	-0.685308	0.434883	-1.57585	0.115061	0.999991
1900	NC_005105.4	-	27668401	27668377	27668448	Rab10	rna27960	gene15627	protein_coding	o	107.242	203.437	156.439	117.316	181.306	172.049	224.358	177.424	167.446	0.3585	0.323802	1.10716	0.268225	0.999991
1901	NC_005113.4	-	114284136	114284117	114284170	Eml6	rna55521	gene30253	protein_coding	i	268.105	192.694	193.722	181.96	182.548	134.849	107.259	180.496	180.204	-0.462974	0.318913	-1.45172	0.146578	0.999991
1902	NC_005112.4	+	71141800	71141791	71142018	Rgs8	rna51721	gene28291	protein_coding	o	224.414	151.067	171.06	180.763	235.946	146.806	161.38	178.96	181.3	-0.00500536	0.305416	-0.0163887	0.986924	0.999991
1903	NC_005100.4	-	267383975	267383957	267384021	Slk	rna8771	gene4812	protein_coding	i	403.151	170.538	214.922	152.033	193.724	155.442	111.195	114.442	189.431	-0.704772	0.39686	-1.77587	0.0757547	0.999991
1904	NC_005100.4	+	16478309	16478276	16478566	Ahi1	rna257	gene184	protein_coding	e	142.989	175.909	227.349	150.835	105.555	131.528	143.668	252.695	166.316	-0.139836	0.367705	-0.380293	0.703728	0.999991
1905	NC_005111.4	+	24476322	24476303	24476440	Fzd9	rna49788	gene27282	protein_coding	p	274.063	134.282	167.405	168.792	259.541	168.064	164.332	147.469	185.493	-0.00378389	0.351074	-0.010778	0.991401	0.999991
1906	NC_005101.4	+	250633894	250633842	250634147	Sep15	rna13414	gene7572	protein_coding	o	59.5789	237.678	131.585	146.047	76.993	241.799	146.62	205.075	155.672	0.216453	0.470416	0.46013	0.645423	0.999991
1907	NC_005120.4	+	157126396	157126376	157126513	Bcap31	rna69999	gene38847	protein_coding	o	113.2	165.166	170.329	174.778	108.039	209.249	194.837	188.945	165.568	0.166658	0.333435	0.49982	0.617202	0.999991
1908	NC_005112.4	+	32438577	32438368	32438864	Cdh19	rna50933	gene27892	protein_coding	i	139.017	115.482	147.667	245.407	337.776	142.821	172.204	165.903	183.285	0.335996	0.397018	0.8463	0.397386	0.999991
1909	NC_005101.4	-	183145088	183145084	183145107	Trim2	rna11402	gene6482	protein_coding	o	97.3122	183.966	179.832	202.311	106.797	184.006	241.086	139.021	166.791	0.0110475	0.375872	0.0293918	0.976552	0.999991
1910	NC_005105.4	-	86811059	86811051	86811088	Fkbp3	rna28855	gene16134	protein_coding	c	45.6772	218.879	135.971	161.609	99.3458	306.899	150.556	122.891	155.228	0.268167	0.496763	0.539829	0.589315	0.999991
1911	NC_005101.4	+	118860478	118860469	118860592	Pik3ca	rna10570	gene5944	protein_coding	c	162.849	183.294	198.108	155.624	202.417	179.356	187.949	110.602	172.525	-0.0463233	0.313121	-0.147941	0.88239	0.999991
1912	NC_005108.4	+	93148283	93148280	93148503	Psmd1	rna41080	gene22663	protein_coding	e	285.979	120.853	183.487	178.369	357.645	134.185	131.859	135.18	190.945	-0.0164386	0.437364	-0.0375856	0.970018	0.999991
1913	NC_005102.4	+	177220645	177220639	177220747	-	-	-	-	u	220.442	194.708	130.854	185.551	244.639	126.878	189.917	158.99	181.497	-0.0214188	0.335175	-0.0639033	0.949047	0.999991
1914	NC_005104.4	+	76189011	76188960	76189260	Gng10	rna24382	gene13833	protein_coding	o	71.4947	116.154	163.019	199.917	67.0584	270.363	234.198	172.816	161.877	0.433328	0.467333	0.927236	0.353804	0.999991
1915	NC_005106.4	-	27543426	27543405	27543432	Stab2	rna31638	gene17907	protein_coding	i	411.095	228.95	228.811	104.148	161.437	237.149	66.9137	13.8253	181.541	-1.01895	0.644248	-1.58161	0.113739	0.999991
1916	NC_005102.4	+	164260500	164260475	164260652	Rnf114	rna18446	gene10442	protein_coding	o	141.003	177.252	157.171	192.734	126.666	203.271	188.933	160.527	168.444	0.0239372	0.300532	0.0796494	0.936516	0.999991
1917	NC_005103.4	+	99999906	99999845	99999943	St3gal5	rna20871	gene11864	protein_coding	o	204.554	210.822	165.943	167.595	229.737	138.835	160.396	137.484	176.921	-0.171563	0.309761	-0.553854	0.579679	0.999991
1918	NC_005104.4	-	9050808	9050761	9050820	Sgk3	rna23305	gene13186	protein_coding	i	65.5368	145.024	299.721	203.508	132.875	287.634	111.195	29.1866	159.335	-0.350633	0.594692	-0.589605	0.555455	0.999991
1919	NC_005100.4	+	213648501	213648483	213648694	Psmd13	rna6551	gene3723	protein_coding	o	81.4245	181.951	161.557	141.259	74.5093	260.399	207.629	155.918	158.081	0.298482	0.429297	0.69528	0.48688	0.999991
1920	NC_005102.4	+	116958060	116958042	116958255	Sema6d	rna16811	gene9608	protein_coding	o	91.3543	185.98	184.949	180.763	70.7839	187.328	211.565	180.496	161.653	0.0122379	0.410387	0.0298204	0.97621	0.999991
1921	NC_005106.4	+	11119375	11119363	11119735	Celf5	rna30925	gene17479	protein_coding	c	424.996	151.067	138.164	147.244	290.586	92.9996	171.22	166.671	197.869	-0.250477	0.475161	-0.527141	0.598096	0.999991
1922	NC_005112.4	+	44162180	44162156	44162457	-	-	-	-	u	182.709	138.31	156.439	187.946	150.261	197.956	173.188	193.554	172.545	0.111415	0.283922	0.392415	0.694752	0.999991
1923	NC_005118.4	+	38409928	38409907	38410107	Nob1	rna65036	gene35713	protein_coding	o	166.821	169.195	162.288	178.369	161.437	161.421	170.236	201.234	171.375	0.0383429	0.267107	0.143549	0.885857	0.999991
1924	NC_005105.4	+	133663303	133663266	133663500	RGD1566401	rna30021	gene16774	lncRNA	i	200.582	134.953	136.702	123.302	263.266	215.228	133.827	192.017	174.985	0.440267	0.335437	1.31252	0.189346	0.999991
1925	NC_005119.4	+	4615242	4615206	4615538	Neu1	rna66175	gene36441	protein_coding	o	258.175	147.71	154.977	175.975	235.946	169.392	164.332	148.237	181.843	-0.0309288	0.326318	-0.0947812	0.924489	0.999991
1926	NC_005105.4	+	26787876	26787799	26788054	Preb	rna27900	gene15596	protein_coding	o	194.624	170.538	72.3715	116.119	276.926	171.385	135.795	265.752	175.439	0.624016	0.405866	1.53749	0.124173	0.999991
1927	NC_005103.4	-	117113071	117113061	117113090	Rab11fip5	rna21138	gene12064	protein_coding	c	139.017	189.337	143.281	156.821	91.8949	265.049	153.508	157.454	162.045	0.089897	0.373048	0.24098	0.809571	0.999991
1928	NC_005113.4	-	93040980	93040971	93040986	LOC100361025	rna55249	gene30089	transcribed_pseudogene	c	127.102	174.566	282.176	74.2206	201.175	39.1927	174.172	263.448	167.007	0.0375881	0.545702	0.0688803	0.945085	0.999991
1929	NC_005113.4	-	84335594	84335570	84335608	Sec14l2	rna54921	gene29962	protein_coding	o	188.667	138.31	152.053	124.499	290.586	164.078	134.811	215.828	176.104	0.418363	0.345127	1.2122	0.225436	0.999991
1930	NC_005102.4	-	46327384	46327368	46327396	Cd302	rna15101	gene8471	protein_coding	o	91.3543	193.365	174.715	241.815	126.666	204.599	204.677	90.6322	165.978	-0.167014	0.4069	-0.410455	0.681472	0.999991
1931	NC_005107.4	-	82506631	82506625	82506652	Tmod2	rna37152	gene20808	protein_coding	c	444.856	112.125	199.57	106.542	279.41	104.957	127.923	187.409	195.349	-0.297361	0.504578	-0.589327	0.555642	0.999991
1932	NC_005104.4	-	147927149	147927139	147927165	Khdrbs1	rna26024	gene14713	protein_coding	c	53.621	198.737	171.791	147.244	52.1565	265.049	162.364	170.511	152.684	0.181709	0.507305	0.358184	0.720206	0.999991
1933	NC_005106.4	-	51424195	51424157	51424245	Ppp1r12a	rna32031	gene18114	protein_coding	c	325.698	183.966	136.702	77.8119	340.259	96.321	91.5143	233.493	185.721	0.0758862	0.52632	0.144183	0.885356	0.999991
1934	NC_005108.4	-	99052942	99052941	99052962	Hdac4	rna41322	gene22768	protein_coding	c	260.161	129.582	141.819	129.287	293.07	135.514	170.236	205.075	183.093	0.289576	0.380488	0.761066	0.446618	0.999991
1935	NC_005105.4	-	128466608	128466605	128466644	-	-	-	-	u	248.246	138.31	170.329	161.609	290.586	139.499	171.22	144.397	183.025	0.0563715	0.363639	0.15502	0.876805	0.999991
1936	NC_005117.4	+	74164492	74164462	74164667	Atp5a1	rna63626	gene34960	protein_coding	o	39.7193	261.178	83.3369	77.8119	43.4638	310.22	86.5942	250.391	144.089	0.574628	0.636884	0.90225	0.366924	0.999991
1937	NC_005100.4	-	57794238	57794233	57794273	Rgmb	rna1103	gene679	protein_coding	c	127.102	192.023	156.439	148.441	197.45	199.285	155.476	152.078	166.037	0.167055	0.295119	0.566061	0.571353	0.999991
1938	NC_005107.4	+	117346741	117346727	117346868	Qrich1	rna38003	gene21232	protein_coding	o	83.4105	193.365	154.977	195.128	70.7839	201.942	208.613	171.28	159.938	0.0547097	0.422464	0.129502	0.896961	0.999991
1939	NC_005109.4	-	7223380	7223349	7223392	Mettl22	rna41996	gene23124	protein_coding	c	232.358	135.624	147.667	125.696	192.482	162.085	162.364	238.87	174.643	0.246861	0.329525	0.74914	0.453773	0.999991
1940	NC_005100.4	+	221665989	221665969	221666231	Ehd1	rna7318	gene4047	protein_coding	c	305.838	138.31	133.778	193.931	391.174	120.235	161.38	103.689	193.542	0.0108869	0.477421	0.0228036	0.981807	0.999991
1941	NC_005104.4	+	144872277	144872256	144872616	LOC100294508	rna25895	gene14643	protein_coding	o	85.3965	213.508	108.923	123.302	127.908	241.799	122.019	227.349	156.275	0.43155	0.404852	1.06595	0.286448	0.999991
1942	NC_005105.4	+	43109076	43109056	43109252	Hpcal1	rna28236	gene15781	protein_coding	o	43.6912	168.523	154.977	105.345	106.797	308.227	109.227	204.307	150.137	0.61644	0.485361	1.27007	0.204061	0.999991
1943	NC_005113.4	+	85171731	85171717	85171961	Thoc5	rna54966	gene29979	protein_coding	o	135.046	157.781	162.288	175.975	129.15	223.863	159.412	172.816	164.541	0.119601	0.303758	0.393739	0.693774	0.999991
1944	NC_005100.4	-	242124083	242124058	242124094	Fxn	rna7956	gene4428	protein_coding	c	192.639	150.395	183.487	153.23	258.299	126.214	150.556	190.481	175.663	0.0928407	0.330295	0.281084	0.778646	0.999991
1945	NC_005113.4	+	77023596	77023578	77024012	Wdr1	rna54508	gene29816	protein_coding	o	133.06	157.781	148.398	149.638	116.731	221.87	177.124	199.698	163.038	0.282043	0.31251	0.902509	0.366786	0.999991
1946	NC_005117.4	-	27130028	27130022	27130033	Reep5	rna62624	gene34353	protein_coding	c	289.951	139.653	120.619	117.316	279.41	211.242	105.291	177.424	180.113	0.220997	0.424475	0.520636	0.60262	0.999991
1947	NC_005108.4	+	82414243	82414198	82414587	Stk16	rna40784	gene22539	protein_coding	o	276.049	171.88	122.081	120.908	330.325	152.785	78.722	197.394	181.268	0.139861	0.462981	0.302087	0.762585	0.999991
1948	NC_005118.4	-	25818075	25818071	25818104	Lyl1	rna64534	gene35448	protein_coding	x	127.102	166.509	127.198	156.821	163.921	153.449	166.3	264.984	165.786	0.372544	0.31922	1.16704	0.243192	0.999991
1949	NC_005103.4	+	77280253	77280146	77280583	Cul1	rna20261	gene11512	protein_coding	o	109.228	155.767	153.515	191.537	126.666	237.813	136.779	181.264	161.571	0.161131	0.341848	0.471353	0.637389	0.999991
1950	NC_005111.4	+	47209789	47209761	47209901	Cabp1	rna50463	gene27625	protein_coding	o	208.526	157.781	201.032	124.499	149.019	165.406	112.179	221.972	167.552	-0.0886968	0.340968	-0.260132	0.794762	0.999991
1951	NC_005106.4	+	119658139	119658124	119658316	Kctd17	rna33477	gene18856	protein_coding	o	162.849	192.023	205.418	181.96	130.391	178.692	112.179	154.382	164.737	-0.366949	0.294997	-1.24391	0.213533	0.999991
1952	NC_005100.4	-	222525545	222525539	222525557	Mark2	rna7438	gene4085	protein_coding	o	117.172	191.351	149.86	144.85	206.143	177.363	149.572	180.496	164.601	0.233064	0.298829	0.779926	0.435435	0.999991
1953	NC_005100.4	-	111149834	111149821	111149878	-	-	-	-	u	162.849	181.951	214.922	131.682	160.195	191.313	153.508	122.123	164.818	-0.14447	0.311065	-0.464435	0.642336	0.999991
1954	NC_005104.4	+	56566872	56566858	56567003	LOC102552818	rna23860	gene13533	lncRNA	o	180.723	146.367	125.736	130.485	233.463	149.464	175.156	235.029	172.053	0.447943	0.310172	1.44418	0.14869	0.999991
1955	NC_005113.4	-	22802614	22802565	22802619	LOC689849	gene29396	gene29396	pseudogene	c	182.709	213.508	65.0613	111.331	679.277	53.8069	106.275	122.123	191.761	0.746013	0.663301	1.1247	0.260717	0.999991
1956	NC_005114.4	+	4230079	4230060	4230231	Ppp3cb	rna55678	gene30313	protein_coding	i	192.639	128.239	154.246	142.456	259.541	172.713	155.476	185.105	173.802	0.327728	0.31239	1.0491	0.294132	0.999991
1957	NC_005104.4	+	78567285	78567260	78567424	Rgs3	rna24476	gene13888	protein_coding	o	224.414	161.809	165.212	173.58	160.195	138.835	194.837	172.048	173.866	-0.116787	0.288533	-0.40476	0.685654	0.999991
1958	NC_005104.4	+	159471114	159471072	159471230	Padi2	rna26610	gene14964	protein_coding	o	230.372	146.367	101.613	202.311	207.384	142.821	152.524	235.029	177.303	0.124484	0.362537	0.343367	0.731322	0.999991
1959	NC_005106.4	-	3052102	3052094	3052157	Rps26	rna30674	gene17223	protein_coding	o	238.316	126.225	173.984	217.873	293.07	68.4211	205.661	159.758	185.414	-0.0572188	0.441192	-0.129691	0.896811	0.999991
1960	NC_005106.4	-	2909449	2909440	2909470	-	-	-	-	u	230.372	150.395	169.598	213.085	199.933	156.106	117.099	166.671	175.407	-0.249919	0.314794	-0.793915	0.427245	0.999991
[truncated: 96,396 more rows]
