# Supplementary material for: Vapor Cannabis Exposure Promotes Genetic Plasticity in the Rat Hypothalamus
Source: Sci Rep. 2019 Nov 14;9:16866. doi: 10.1038/s41598-019-53516-4 (PMC6856070; doi:10.1038/s41598-019-53516-4)
Supplement: Supplementary file 2 — Dataset 2 [file 41598_2019_53516_MOESM2_ESM.xlsx]

## Sheet: Sheet1
Group	chr	strand	coord	start	end	symbol	transcript	gene_id	gene_biotype	class_code	Control 4	Control 3	Control 1	Control 2	Cannabis 1	Cannabis 2	Cannabis 3	Cannabis 4	baseMean	log2FoldChange	lfcSE	stat	pvalue	padj
Down	NC_005100.4	-	32321580	32321563	32321583	Slc6a3	rna578	gene375	protein_coding	o	256.189	266.549	320.92	237.027	16.1437	12.6214	38.377	59.9094	150.967	-3.0834	0.466913	-6.6038	4.00737e-11	3.93047e-06
Down	NC_005112.4	+	36537894	36537888	36537922	En1	rna50982	gene27931	protein_coding	o	39.7193	25.5135	44.5926	17.9566	2.48364	3.9857	4.92012	3.84035	17.8765	-3.04444	0.570882	-5.33286	9.6676e-08	0.00474104
Down	NC_005109.4	+	85789127	85789123	85789199	LOC108352127	rna45378	gene24890	lncRNA	o	9.92982	18.128	16.8136	57.4611	0	0.664283	3.9361	2.30421	13.6546	-3.88098	0.818376	-4.74229	2.11319e-06	0.0690878
Down	NC_005108.4	-	83993906	83993902	83993911	-	-	-	-	u	73.4807	14.771	26.3169	14.3653	1.24182	2.65713	0.984025	7.6807	17.6872	-3.25721	0.744216	-4.3767	1.20487e-05	0.23635
Down	NC_005104.4	+	56350740	56350436	56351054	-	-	-	-	u	154.905	138.981	127.929	119.711	45.9474	72.4068	54.1214	39.1716	94.1467	-1.34626	0.330508	-4.07331	4.63488e-05	0.757657
Down	NC_005103.4	+	173590976	173590942	173591127	-	-	-	-	u	150.933	21.485	136.702	75.4177	16.1437	27.2356	9.84025	0.76807	54.8157	-2.82287	0.710888	-3.9709	7.16009e-05	0.89124
Down	NC_005100.4	-	216073029	216072999	216073039	Th	rna6821	gene3825	protein_coding	o	291.937	267.22	372.823	287.306	72.0257	98.9781	123.987	172.816	210.887	-1.37889	0.347565	-3.96729	7.26942e-05	0.89124
Down	NC_005110.4	+	51642815	51642775	51642987	-	-	-	-	u	91.3543	6.71408	17.5446	7.18264	6.20911	1.32857	2.95207	1.53614	16.8527	-3.38787	0.870265	-3.89292	9.9044e-05	0.986995
Down	NC_005103.4	-	157359327	157359321	157359332	P3h3	rna22201	gene12603	protein_coding	o	133.06	56.3982	108.192	75.4177	24.8364	5.31426	34.4409	29.1866	58.3557	-1.99716	0.516879	-3.86388	0.000111599	0.995069
Down	NC_005120.4	-	55716833	55716833	55716840	Il1rapl1	rna68453	gene37775	protein_coding	i	1.98596	11.4139	10.2344	14.3653	0	0.664283	0.984025	0	4.95598	-4.48497	1.20084	-3.73488	0.000187807	0.999991
Down	NC_005102.4	-	14554621	14554620	14554621	Ggta1l1	rna14658	gene8109	protein_coding	p	51.6351	12.7567	19.7377	9.57685	4.96729	4.64998	3.9361	0	13.4075	-2.77739	0.751478	-3.6959	0.000219105	0.999991
Down	NC_005100.4	-	263066176	263066176	263066177	Hpse2	rna8484	gene4695	protein_coding	i	75.4666	8.05689	16.8136	10.774	0	5.97854	3.9361	0	15.1282	-3.37984	0.914793	-3.69465	0.000220187	0.999991
Down	NC_005107.4	-	130120520	130120517	130120537	Cck	rna38593	gene21468	protein_coding	o	85.3965	115.482	143.281	112.528	40.9801	57.1283	46.2492	53.7649	81.8513	-1.20725	0.326987	-3.69204	0.000222467	0.999991
Down	NC_005100.4	-	28759928	28759927	28759932	-	-	-	-	u	37.7333	8.7283	22.6618	21.5479	3.72547	7.30711	3.9361	1.53614	13.397	-2.39099	0.650067	-3.67807	0.000235002	0.999991
Down	NC_005101.4	-	32094608	32094605	32094612	-	-	-	-	u	31.7754	77.8833	473.705	59.8553	21.111	42.5141	30.5048	6.91263	93.0326	-2.67316	0.732662	-3.64855	0.000263723	0.999991
Down	NC_005103.4	-	157436583	157436538	157436607	Ptms	rna22219	gene12607	protein_coding	e	546.14	484.085	972.264	569.823	276.926	271.027	260.767	328.734	463.721	-1.17821	0.323047	-3.64718	0.00026513	0.999991
Down	NC_005108.4	-	38026371	38026370	38026372	Dst	rna39707	gene22056	protein_coding	i	83.4105	10.7425	29.241	25.1392	12.4182	5.97854	1.96805	0	21.1123	-2.89357	0.794021	-3.64419	0.000268231	0.999991
Down	NC_005120.4	+	144308320	144308318	144308332	RGD1561327	rna69734	gene38703	protein_coding	i	1.98596	4.69985	8.77231	4.78843	0	0	0	0	2.53082	-5.00485	1.37807	-3.63179	0.000281462	0.999991
Down	NC_005103.4	-	140870211	140870209	140870228	Arl8b	rna21634	gene12341	protein_coding	i	45.6772	6.04267	1.46205	5.98553	0	0.664283	0	1.53614	7.67098	-4.50976	1.24799	-3.61361	0.000301964	0.999991
Down	NC_005102.4	+	125439859	125439798	125439931	Chgb	rna17180	gene9798	protein_coding	c	9.92982	2.68563	97.2264	8.37974	0	2.65713	4.92012	3.07228	16.1089	-3.45805	0.974987	-3.54676	0.000389995	0.999991
Down	NC_005107.4	+	67069920	67069912	67069956	Glce	rna36681	gene20588	protein_coding	i	25.8175	6.71408	8.04128	7.18264	2.48364	0.664283	1.96805	0	6.60894	-3.30603	0.933851	-3.54021	0.000399805	0.999991
Down	NC_005109.4	+	98224519	98224517	98224531	-	-	-	-	u	81.4245	4.02845	19.7377	8.37974	4.96729	5.31426	1.96805	1.53614	15.9195	-3.00149	0.850128	-3.53063	0.000414566	0.999991
Down	NC_005118.4	-	50726371	50726371	50726372	-	-	-	-	u	27.8035	2.01422	12.4274	15.5624	1.24182	3.32141	0	0	7.79635	-3.51929	1.00604	-3.49817	0.000468455	0.999991
Down	NC_005100.4	+	76549486	76549470	76549527	Sult2a6	rna1857	gene1199	protein_coding	i	29.7895	2.01422	13.1585	4.78843	1.24182	1.99285	0	0	6.62316	-3.83236	1.11576	-3.43476	0.000593073	0.999991
Down	NC_005112.4	+	106277570	106277561	106277624	Esrrg	rna52874	gene28894	protein_coding	i	17.8737	2.01422	5.11718	3.59132	0	0.664283	0	0	3.65759	-4.62706	1.35512	-3.41449	0.000639018	0.999991
Down	NC_005118.4	-	56620624	56620622	56620649	Ccsap	rna65610	gene35995	protein_coding	c	9.92982	6.71408	8.77231	7.18264	1.24182	0	0.984025	0.76807	4.4491	-3.58757	1.05578	-3.39804	0.000678713	0.999991
Down	NC_005104.4	-	53726073	53726073	53726073	-	-	-	-	u	49.6491	1.34282	9.50333	8.37974	2.48364	0.664283	2.95207	0	9.37187	-3.54474	1.04402	-3.39529	0.000685567	0.999991
Down	NC_005103.4	+	144525475	144525421	144525552	-	-	-	-	u	49.6491	6.71408	2.9241	3.59132	0	1.32857	2.95207	0	8.39491	-3.79519	1.12008	-3.38833	0.000703187	0.999991
Down	NC_005102.4	-	106161018	106161018	106161018	LOC102552721	rna16445	gene9432	lncRNA	i	39.7193	1.34282	5.84821	1.19711	1.24182	0.664283	0	0	6.25169	-4.70383	1.38987	-3.38438	0.000713391	0.999991
Down	NC_005104.4	+	124912353	124912349	124912409	-	-	-	-	u	15.8877	5.37126	26.3169	3.59132	2.48364	0.664283	2.95207	0	7.1584	-3.19776	0.949705	-3.3671	0.000759618	0.999991
Down	NW_007906422.1	+	370432	370392	370453	-	-	-	-	u	37.7333	9.39971	17.5446	10.774	7.45093	3.9857	0.984025	2.30421	11.2721	-2.35251	0.70169	-3.35264	0.00080045	0.999991
Down	NC_005108.4	+	40819366	40819360	40819559	LOC689904	gene22071	gene22071	pseudogene	p	51.6351	36.9274	73.8336	44.2929	13.66	26.5713	21.6485	14.5933	35.3953	-1.42222	0.42463	-3.34932	0.000810097	0.999991
Down	NC_005105.4	-	15027696	15027632	15027700	Nrxn1	rna27711	gene15468	protein_coding	i	33.7614	40.9559	55.5579	33.519	6.20911	15.2785	21.6485	3.07228	26.2503	-1.83027	0.546754	-3.34753	0.000815366	0.999991
Down	NC_005120.4	-	28697624	28697623	28697627	LOC102549869	rna68135	gene37551	lncRNA	i	7.94386	2.68563	17.5446	3.59132	1.24182	0.664283	0	0	4.20894	-4.19578	1.27086	-3.30154	0.00096155	0.999991
Down	NC_005110.4	-	83459239	83459239	83459239	LOC681827	gene26539	gene26539	pseudogene	i	9.92982	12.0853	23.3928	10.774	0	5.31426	0.984025	3.07228	8.19406	-2.47079	0.750837	-3.29071	0.000999337	0.999991
Down	NC_005115.4	+	6171254	6171244	6171288	LOC108348454	rna58030	gene31801	lncRNA	c	5.95789	2.01422	17.5446	1.19711	0	0.664283	0	0	3.42226	-4.65615	1.418	-3.28361	0.00102488	0.999991
Down	NC_005104.4	+	69985780	69985773	69985788	-	-	-	-	u	29.7895	18.128	135.24	25.1392	8.69276	21.9213	7.8722	3.07228	31.2319	-2.31988	0.708399	-3.27482	0.00105728	0.999991
Down	NC_005108.4	-	57267785	57267785	57267785	-	-	-	-	u	19.8596	55.7268	364.051	33.519	8.69276	36.5355	22.6326	18.4337	69.9313	-2.45253	0.749681	-3.27144	0.00107003	0.999991
Down	NC_005107.4	-	116746102	116746102	116746102	Traip	rna37938	gene21204	protein_coding	i	107.242	10.0711	29.241	16.7595	7.45093	15.2785	1.96805	1.53614	23.6934	-2.58923	0.794281	-3.25984	0.00111475	0.999991
Down	NC_005120.4	-	80611371	80611371	80611371	-	-	-	-	u	19.8596	0	5.11718	5.98553	0	0.664283	0	0	3.95333	-4.76393	1.46901	-3.24295	0.00118299	0.999991
Down	NC_005103.4	+	94610356	94610354	94610417	Grid2	rna20743	gene11803	protein_coding	i	9.92982	16.1138	2.19308	3.59132	0	0	0	1.53614	4.17052	-4.18398	1.29943	-3.21984	0.0012826	0.999991
Down	NC_005108.4	-	53583091	53583091	53583091	-	-	-	-	u	27.8035	4.69985	16.8136	13.1682	4.96729	3.32141	2.95207	0	9.21574	-2.48824	0.782136	-3.18134	0.00146598	0.999991
Down	NC_005101.4	-	137010800	137010800	137010804	Pcdh10	rna10809	gene6096	protein_coding	i	250.231	12.0853	70.9095	61.0524	22.3528	38.5284	9.84025	5.37649	58.7971	-2.35562	0.740734	-3.18011	0.00147217	0.999991
Down	NC_005109.4	-	20156954	20156954	20156954	Slit3	rna42716	gene23470	protein_coding	i	29.7895	2.68563	3.65513	1.19711	1.24182	0.664283	0	0	4.90418	-4.31444	1.36336	-3.16456	0.0015532	0.999991
Down	NC_005112.4	+	88061491	88061475	88061545	-	-	-	-	u	37.7333	2.01422	16.8136	2.39421	2.48364	2.65713	0.984025	0	8.13502	-3.23298	1.03011	-3.13849	0.00169819	0.999991
Down	NC_005105.4	+	43849967	43849966	43849973	Cys1	rna28261	gene15795	protein_coding	i	218.456	29.5419	53.3649	19.1537	32.2874	19.9285	10.8243	6.14456	48.7127	-2.20659	0.706244	-3.1244	0.00178169	0.999991
Down	NC_005110.4	-	63877374	63877374	63877395	-	-	-	-	u	97.3122	6.04267	14.6205	3.59132	9.93458	1.32857	3.9361	0.76807	17.1918	-2.9659	0.951173	-3.11815	0.00181992	0.999991
Down	NC_005101.4	-	39724407	39724406	39724410	-	-	-	-	u	63.5508	16.1138	9.50333	4.78843	1.24182	3.9857	7.8722	3.07228	13.766	-2.47308	0.793869	-3.11522	0.00183805	0.999991
Down	NC_005111.4	+	43074512	43074487	43074538	-	-	-	-	u	5.95789	10.7425	46.7856	11.9711	2.48364	4.64998	5.90415	0	11.0619	-2.56899	0.826743	-3.10736	0.00188764	0.999991
Down	NC_005111.4	-	8159064	8159063	8159064	Mtus2	rna49088	gene26882	protein_coding	i	3.97193	2.68563	11.6964	2.39421	0	0	0	0.76807	2.68953	-4.30207	1.38537	-3.10536	0.0019005	0.999991
Down	NC_005100.4	-	120081292	120081289	120081302	-	-	-	-	u	196.61	15.4424	52.6338	14.3653	21.111	19.9285	8.85622	3.84035	41.5985	-2.36382	0.762178	-3.10141	0.00192604	0.999991
Down	NC_005106.4	+	131378451	131378449	131378471	LOC102550441	rna34058	gene19112	lncRNA	i	59.5789	103.397	608.944	107.74	32.2874	73.0711	63.9616	3.84035	131.603	-2.34687	0.758153	-3.09551	0.00196472	0.999991
Down	NC_005102.4	-	131270509	131270509	131270509	-	-	-	-	u	7.94386	8.7283	10.2344	8.37974	2.48364	1.99285	0	1.53614	5.16236	-2.56655	0.82959	-3.09376	0.00197639	0.999991
Down	NC_005103.4	-	12446142	12446142	12446142	Magi2	rna19250	gene10872	protein_coding	i	19.8596	2.68563	14.6205	9.57685	2.48364	1.99285	1.96805	1.53614	6.84041	-2.51822	0.815353	-3.0885	0.00201168	0.999991
Down	NC_005101.4	+	95483682	95483672	95483686	-	-	-	-	u	27.8035	1.34282	2.19308	4.78843	1.24182	0	0.984025	0	4.79421	-4.19272	1.36047	-3.08182	0.00205742	0.999991
Down	NC_005104.4	+	58997930	58997889	58997976	Ccdc107	rna23998	gene13604	protein_coding	c	61.5649	96.6827	70.1785	13.1682	19.8692	25.2427	11.8083	19.2017	39.7145	-1.66846	0.541695	-3.08007	0.00206949	0.999991
Down	NC_005118.4	+	42372699	42372698	42372699	-	-	-	-	u	3.97193	2.68563	10.9654	2.39421	1.24182	0	0	0	2.65737	-4.24889	1.38255	-3.07322	0.00211765	0.999991
Down	NC_005110.4	+	44808125	44808116	44808287	-	-	-	-	u	190.653	130.925	194.453	112.528	94.3785	63.1069	79.706	32.2589	112.251	-1.22792	0.400522	-3.0658	0.00217092	0.999991
Down	NC_005111.4	-	14609513	14609482	14609523	Sdk1	rna49283	gene27010	protein_coding	i	240.302	145.024	116.233	117.316	81.9603	80.3782	43.2971	69.8943	111.801	-1.15706	0.377931	-3.06157	0.0022018	0.999991
Down	NC_005113.4	+	69730668	69730664	69730683	-	-	-	-	u	13.9017	10.0711	16.0826	7.18264	1.24182	3.32141	2.95207	3.07228	7.22821	-2.10439	0.688829	-3.05502	0.00225045	0.999991
Down	NC_005103.4	+	77089105	77089082	77089129	-	-	-	-	u	9.92982	9.39971	58.4821	7.18264	1.24182	6.64283	1.96805	5.37649	12.5279	-2.44717	0.801583	-3.05292	0.00226629	0.999991
Down	NC_005104.4	+	151530128	151530127	151530129	Wdtc1	rna26214	gene14779	protein_coding	i	23.8316	0.671408	0.731026	3.59132	1.24182	0	0	0	3.75839	-4.63028	1.52	-3.04624	0.00231724	0.999991
Down	NC_005108.4	-	17104209	17104205	17104209	Tjap1	rna39318	gene21858	protein_coding	i	23.8316	7.38549	10.9654	1.19711	1.24182	1.32857	1.96805	1.53614	6.18177	-2.77521	0.911071	-3.04609	0.00231835	0.999991
Down	NC_005117.4	-	29585913	29585913	29585917	Ndufa2	rna62760	gene34420	protein_coding	c	3.97193	0	29.241	4.78843	1.24182	0	0.984025	0	5.0284	-4.38517	1.44172	-3.04162	0.00235305	0.999991
Down	NC_005100.4	-	97245769	97245769	97245776	-	-	-	-	u	7.94386	6.04267	50.4408	5.98553	0	5.31426	2.95207	2.30421	10.1229	-2.6894	0.886942	-3.03222	0.00242763	0.999991
Down	NC_005106.4	-	119429021	119428992	119429026	Pvalb	rna33468	gene18850	protein_coding	c	63.5508	107.425	152.053	101.754	65.8166	28.5642	51.1693	41.4758	76.4762	-1.2073	0.400876	-3.01165	0.00259836	0.999991
Down	NC_005100.4	-	62863622	62863615	62863627	-	-	-	-	u	15.8877	12.7567	19.0067	15.5624	3.72547	5.31426	5.90415	4.60842	10.3457	-1.67815	0.557399	-3.01067	0.00260668	0.999991
Down	NC_005118.4	-	38305430	38305430	38305454	Smpd3	rna65031	gene35710	protein_coding	i	35.7474	31.5562	10.9654	7.18264	6.20911	8.63567	2.95207	0.76807	13.0021	-2.18001	0.724891	-3.00736	0.00263528	0.999991
Down	NC_005120.4	+	106312139	106312087	106312152	Gprasp1	rna69078	gene38300	protein_coding	c	5.95789	0.671408	21.1997	8.37974	0	0.664283	1.96805	0.76807	4.95115	-3.40784	1.13648	-2.9986	0.00271219	0.999991
Down	NC_005107.4	-	85111400	85111400	85111400	-	-	-	-	u	1.98596	1.34282	13.8895	3.59132	0	0	0.984025	0	2.7242	-4.3202	1.44075	-2.99859	0.00271235	0.999991
Down	NC_005110.4	+	66503139	66503115	66503244	Stxbp5l	rna47948	gene26275	protein_coding	i	23.8316	14.771	19.7377	15.5624	7.45093	4.64998	8.85622	2.30421	12.1455	-1.69466	0.565963	-2.9943	0.00275074	0.999991
Down	NC_005105.4	+	43585025	43585023	43585026	-	-	-	-	u	31.7754	10.7425	12.4274	7.18264	6.20911	1.99285	4.92012	0.76807	9.50227	-2.19256	0.733522	-2.98909	0.00279808	0.999991
Down	NC_005120.4	-	153541138	153541138	153541138	Aff2	rna69853	gene38782	protein_coding	c	357.474	97.3541	120.619	116.119	50.9147	47.1641	84.6261	76.807	118.885	-1.40179	0.469534	-2.98549	0.00283126	0.999991
Down	NC_005103.4	+	144525377	144525369	144525386	-	-	-	-	u	23.8316	2.01422	2.19308	0	0	0.664283	0	0	3.58789	-4.59974	1.54251	-2.98198	0.00286388	0.999991
Down	NC_005102.4	+	160395302	160395237	160395345	Ywhab	rna18238	gene10337	protein_coding	e	57.593	9.39971	10.2344	4.78843	1.24182	6.64283	3.9361	0	11.7295	-2.70011	0.90552	-2.98183	0.00286526	0.999991
Down	NC_005110.4	-	12105119	12105118	12105125	Robo2	rna46950	gene25668	protein_coding	i	3.97193	4.69985	7.31026	0	0	0	0	0	1.99775	-4.64179	1.5574	-2.98048	0.00287798	0.999991
Down	NC_005101.4	+	198284850	198284844	198284885	Otud7b	rna12229	gene6884	protein_coding	e	1.98596	1.34282	11.6964	4.78843	1.24182	0	0	0	2.63193	-4.24357	1.42387	-2.9803	0.00287966	0.999991
Down	NC_005100.4	-	277609108	277609105	277609115	Ccdc186	rna8943	gene4901	protein_coding	c	1.98596	2.01422	12.4274	8.37974	0	0.664283	0.984025	0	3.30696	-3.86373	1.30694	-2.95633	0.00311328	0.999991
Down	NC_005115.4	-	68871258	68871240	68871263	-	-	-	-	u	21.8456	18.7994	35.0892	33.519	8.69276	4.64998	15.7444	9.98491	18.5407	-1.50949	0.512096	-2.94766	0.00320187	0.999991
Down	NC_005108.4	-	113132788	113132788	113132801	Tmem232	rna41554	gene22898	protein_coding	i	31.7754	2.68563	10.9654	15.5624	2.48364	4.64998	2.95207	0	8.88432	-2.52392	0.856786	-2.9458	0.00322124	0.999991
Down	NC_005100.4	+	123951940	123951939	123951997	Chrna7	rna3957	gene2238	protein_coding	i	37.7333	1.34282	11.6964	4.78843	2.48364	1.99285	0.984025	2.30421	7.91571	-2.76415	0.938577	-2.94504	0.00322914	0.999991
Down	NC_005100.4	+	252371973	252371967	252372011	-	-	-	-	u	23.8316	2.68563	4.38615	2.39421	1.24182	0.664283	0.984025	0	4.52346	-3.51962	1.19743	-2.93932	0.00328932	0.999991
Down	NC_005109.4	-	90199877	90199877	90199878	LOC303566	rna45790	gene25102	protein_coding	i	3.97193	6.04267	11.6964	4.78843	2.48364	0.664283	0	0	3.70592	-3.33046	1.13406	-2.93676	0.00331661	0.999991
Down	NC_005120.4	+	48737067	48737045	48737277	-	-	-	-	u	53.621	20.1422	36.5513	17.9566	7.45093	10.6285	12.7923	13.8253	21.621	-1.47591	0.502617	-2.93644	0.00332	0.999991
Down	NC_005100.4	-	131867867	131867866	131867867	-	-	-	-	u	15.8877	6.04267	5.84821	4.78843	1.24182	0	2.95207	0	4.59511	-3.06238	1.04394	-2.93347	0.00335198	0.999991
Down	NC_005100.4	+	21002787	21002783	21002807	Epb41l2	rna318	gene219	protein_coding	i	7.94386	4.02845	5.84821	4.78843	0	0	0.984025	0.76807	3.04513	-3.63062	1.23983	-2.92833	0.00340793	0.999991
Down	NC_005117.4	+	24501075	24501069	24501111	-	-	-	-	u	1.98596	9.39971	5.84821	4.78843	0	0.664283	0.984025	0	2.95883	-3.72188	1.27149	-2.92718	0.00342046	0.999991
Down	NC_005104.4	-	162992418	162992416	162992439	Vps13d	rna26758	gene15039	protein_coding	i	25.8175	3.35704	2.19308	1.19711	0	0	0	1.53614	4.26261	-4.11403	1.40863	-2.92058	0.00349381	0.999991
Down	NC_005112.4	-	98089297	98089283	98089298	-	-	-	-	u	33.7614	8.05689	17.5446	4.78843	4.96729	3.9857	3.9361	1.53614	9.82207	-2.12596	0.728135	-2.91973	0.00350337	0.999991
Down	NC_005102.4	+	164252208	164252204	164252217	Rnf114	rna18446	gene10442	protein_coding	i	21.8456	7.38549	10.2344	5.98553	1.24182	3.9857	0.984025	2.30421	6.74584	-2.26277	0.775336	-2.91844	0.00351782	0.999991
Down	NC_005106.4	-	73355362	73355362	73355367	Nipal2	rna32505	gene18376	protein_coding	i	19.8596	0	3.65513	2.39421	1.24182	0	0	0	3.39385	-4.48662	1.53808	-2.91704	0.00353375	0.999991
Down	NC_005101.4	-	231255688	231255685	231255696	Ank2	rna13066	gene7365	protein_coding	i	3.97193	3.35704	24.8549	3.59132	0	0	2.95207	0.76807	4.93691	-3.35323	1.15029	-2.91511	0.0035556	0.999991
Down	NC_005109.4	-	87120513	87120508	87120537	Smarce1	rna45489	gene24939	protein_coding	c	1.98596	0.671408	19.0067	1.19711	1.24182	0	0	0	3.01287	-4.45504	1.53616	-2.90011	0.00373031	0.999991
Down	NC_005109.4	+	39648227	39648226	39648232	-	-	-	-	u	33.7614	13.4282	14.6205	13.1682	9.93458	4.64998	4.92012	0.76807	11.9064	-1.90792	0.658125	-2.89902	0.00374334	0.999991
Down	NC_005113.4	+	82361975	82361926	82362160	Slbp	rna54779	gene29909	protein_coding	i	218.456	36.9274	46.7856	19.1537	22.3528	34.5427	11.8083	3.07228	49.1374	-2.14396	0.73997	-2.89737	0.0037631	0.999991
Down	NC_005116.4	+	42520293	42520226	42520613	Fam65b	rna61105	gene33466	protein_coding	i	148.947	12.0853	16.0826	3.59132	11.1764	9.96424	6.88817	4.60842	26.668	-2.44434	0.843731	-2.89707	0.00376671	0.999991
Down	NC_005103.4	-	108356690	108356681	108356696	Ctnna2	rna20944	gene11959	protein_coding	i	5.95789	0.671408	8.77231	3.59132	0	0	0	0.76807	2.47012	-4.1225	1.43118	-2.88049	0.00397052	0.999991
Down	NC_005104.4	-	160340122	160340116	160340141	Dnajc16	rna26696	gene14996	protein_coding	i	21.8456	14.771	24.1238	14.3653	7.45093	8.63567	4.92012	4.60842	12.5901	-1.5407	0.534992	-2.87986	0.00397854	0.999991
Down	NC_005100.4	-	220805127	220805099	220805157	Drap1	rna7185	gene3989	protein_coding	c	43.6912	44.3129	383.057	450.112	48.4311	105.621	52.1533	22.274	143.707	-2.01077	0.698442	-2.87893	0.00399026	0.999991
Down	NC_005103.4	-	87973163	87973159	87973176	-	-	-	-	u	33.7614	6.04267	3.65513	3.59132	2.48364	2.65713	0.984025	0	6.64691	-2.86952	0.998012	-2.87523	0.0040373	0.999991
Down	NC_005102.4	-	149599912	149599912	149599913	-	-	-	-	u	41.7052	2.01422	4.38615	5.98553	1.24182	3.9857	0	0	7.41483	-3.21481	1.11887	-2.87328	0.00406235	0.999991
Down	NC_005102.4	+	168688319	168688319	168688757	-	-	-	-	u	55.607	30.8848	254.397	77.8119	7.45093	37.1998	49.2012	20.7379	66.6613	-1.86851	0.651057	-2.86996	0.00410527	0.999991
Down	NC_005107.4	+	33874103	33874042	33874114	Ets1	rna35476	gene19914	protein_coding	i	23.8316	1.34282	2.9241	2.39421	1.24182	0	0.984025	0	4.08982	-3.93495	1.37243	-2.86715	0.00414188	0.999991
Down	NC_005101.4	-	178608860	178608860	178608861	Tmem144	rna11341	gene6439	protein_coding	i	23.8316	1.34282	4.38615	1.19711	0	1.32857	0	0	4.01078	-4.09249	1.42758	-2.86674	0.00414729	0.999991
Down	NC_005119.4	-	10075752	10075748	10075752	Slc37a1	rna66564	gene36638	protein_coding	i	5.95789	3.35704	5.11718	2.39421	0	0.664283	0	0	2.18633	-3.93959	1.3747	-2.86578	0.00415981	0.999991
Down	NC_005102.4	+	22177782	22177757	22177804	Dennd1a	rna14780	gene8308	protein_coding	i	49.6491	32.2276	53.3649	37.1103	18.6273	17.2713	21.6485	21.506	31.4256	-1.11781	0.390197	-2.86474	0.00417356	0.999991
Down	NC_005100.4	-	161685715	161685714	161685715	Tenm4	rna4658	gene2645	protein_coding	i	55.607	2.01422	13.8895	0	1.24182	2.65713	2.95207	1.53614	9.98723	-3.02403	1.05589	-2.86396	0.00418376	0.999991
Down	NC_005119.4	+	10965573	10965573	10965640	-	-	-	-	u	35.7474	5.37126	4.38615	5.98553	2.48364	2.65713	1.96805	1.53614	7.51691	-2.47297	0.865057	-2.85873	0.00425336	0.999991
Down	NC_005115.4	+	4125970	4125968	4125981	Erc2	rna57961	gene31768	protein_coding	i	7.94386	1.34282	5.11718	3.59132	0	0.664283	0	0	2.33243	-3.99089	1.39663	-2.85751	0.00426974	0.999991
Down	NC_005115.4	-	78811128	78811128	78811128	Csmd1	rna59675	gene32694	protein_coding	i	9.92982	2.68563	5.11718	4.78843	1.24182	0.664283	0	0	3.0534	-3.60838	1.26429	-2.85408	0.00431613	0.999991
Down	NC_005114.4	-	77559992	77559991	77560000	Pcdh9	rna57426	gene31463	protein_coding	i	13.9017	16.7852	10.9654	10.774	4.96729	0.664283	1.96805	6.14456	8.27131	-1.9735	0.692214	-2.851	0.00435816	0.999991
Down	NC_005101.4	+	4205001	4204997	4205018	RGD1560883	rna9162	gene5027	protein_coding	i	7.94386	2.01422	4.38615	8.37974	1.24182	0.664283	0	0	3.07876	-3.63346	1.2754	-2.84889	0.00438727	0.999991
Down	NW_007906132.1	-	19895	19892	19896	-	-	-	-	u	5.95789	4.69985	35.0892	0	0	2.65713	0.984025	0.76807	6.26953	-3.29405	1.15662	-2.84799	0.00439967	0.999991
Down	NC_005120.4	-	139047526	139047525	139047526	Usp26	rna69667	gene38656	protein_coding	c	19.8596	1.34282	2.19308	9.57685	0	1.99285	0	0	4.37065	-3.70608	1.30229	-2.84582	0.00442967	0.999991
Down	NC_005100.4	-	85798665	85798664	85798666	-	-	-	-	u	43.6912	3.35704	35.0892	15.5624	7.45093	7.30711	4.92012	0	14.6723	-2.30778	0.812065	-2.84187	0.00448503	0.999991
Down	NC_005108.4	-	91302459	91302458	91302464	-	-	-	-	u	5.95789	1.34282	10.2344	1.19711	0	0.664283	0	0	2.42456	-4.11929	1.45121	-2.83853	0.00453221	0.999991
Down	NC_005100.4	-	277050725	277050725	277050725	LOC102546997	rna8900	gene4885	lncRNA	i	13.9017	4.69985	4.38615	1.19711	0	0.664283	0.984025	0	3.22915	-3.70198	1.30453	-2.83779	0.00454265	0.999991
Down	NC_005102.4	+	59590735	59590735	59590739	LOC108350397	rna15347	gene8606	lncRNA	i	7.94386	0	8.04128	1.19711	0	0	0	0	2.14778	-4.68	1.6497	-2.83687	0.00455581	0.999991
Down	NC_005114.4	-	96116898	96116885	96116898	-	-	-	-	u	55.607	21.485	17.5446	25.1392	9.93458	8.63567	15.7444	7.6807	20.2214	-1.47444	0.522793	-2.82032	0.00479763	0.999991
Down	NC_005104.4	-	14641815	14641814	14641816	-	-	-	-	u	21.8456	3.35704	10.9654	11.9711	3.72547	1.32857	3.9361	1.53614	7.33317	-2.19517	0.778498	-2.81975	0.00480615	0.999991
Down	NC_005106.4	-	25266893	25266893	25266897	-	-	-	-	u	9.92982	2.01422	16.0826	4.78843	0	2.65713	0	0.76807	4.53003	-3.04872	1.08157	-2.81878	0.00482058	0.999991
Down	NC_005102.4	+	157066924	157066924	157067077	Chd6	rna18137	gene10283	protein_coding	i	7.94386	4.69985	3.65513	4.78843	0	0.664283	0.984025	0	2.84195	-3.53804	1.25657	-2.81564	0.00486798	0.999991
Down	NC_005120.4	+	68291540	68291539	68291572	Ophn1	rna68566	gene37901	protein_coding	i	3.97193	0	8.04128	3.59132	0	0	0	0	1.95057	-4.5742	1.62612	-2.81296	0.00490874	0.999991
Down	NC_005104.4	+	116603180	116603159	116603385	Nfia	rna24891	gene14155	protein_coding	i	95.3263	27.5277	32.8962	34.7161	21.111	11.2928	22.6326	15.3614	32.608	-1.41366	0.502776	-2.81172	0.00492775	0.999991
Down	NC_005105.4	+	133734914	133734914	133734924	Mir1188	rna30060	gene16790	miRNA	p	1.98596	0.671408	15.3515	0	0	0	0	0	2.25111	-4.82671	1.71672	-2.81159	0.00492971	0.999991
Down	NC_005102.4	-	45761805	45761804	45761806	Tanc1	rna15061	gene8464	protein_coding	i	11.9158	4.69985	7.31026	4.78843	1.24182	1.32857	0	1.53614	4.10261	-2.70067	0.961288	-2.80943	0.00496294	0.999991
Down	NC_005113.4	+	46643920	46643857	46643934	Rn18s	rna54243	gene29634	rRNA	c	9.92982	8.7283	27.779	2.39421	0	0.664283	2.95207	4.60842	7.13201	-2.55311	0.909235	-2.80798	0.00498536	0.999991
Down	NC_005105.4	-	65440585	65440585	65440622	-	-	-	-	u	5.95789	4.02845	3.65513	2.39421	1.24182	0	0	0	2.15969	-3.86185	1.37668	-2.80519	0.00502874	0.999991
Down	NC_005108.4	-	66057795	66057795	66057799	-	-	-	-	u	1.98596	2.68563	16.8136	4.78843	0	1.32857	0	0.76807	3.54628	-3.48656	1.24338	-2.80411	0.00504564	0.999991
Down	NC_005100.4	+	135926398	135926382	135926746	Slco3a1	rna4139	gene2341	protein_coding	i	139.017	38.9416	56.289	39.5045	31.0456	35.8713	11.8083	5.37649	44.7318	-1.68737	0.601991	-2.80297	0.00506337	0.999991
Down	NC_005100.4	-	167250311	167250308	167250312	Nup98	rna4998	gene2773	protein_coding	i	29.7895	2.01422	0	2.39421	0	0.664283	0.984025	0	4.48078	-4.19532	1.49789	-2.80082	0.00509732	0.999991
Down	NC_005100.4	-	192926352	192926352	192926352	-	-	-	-	u	29.7895	0	1.46205	7.18264	1.24182	0.664283	0	0.76807	5.13854	-3.78919	1.35469	-2.79709	0.00515655	0.999991
Down	NC_005118.4	+	11827573	11827570	11827582	-	-	-	-	u	5.95789	3.35704	2.19308	4.78843	1.24182	0	0	0	2.19228	-3.85822	1.37972	-2.79637	0.00516802	0.999991
Down	NC_005119.4	+	7282828	7282824	7282890	Pacsin1	rna66464	gene36585	protein_coding	c	7.94386	0.671408	23.3928	0	1.24182	0	0.984025	0	4.27924	-4.11999	1.47618	-2.79098	0.00525482	0.999991
Down	NC_005118.4	-	49505403	49505403	49505403	-	-	-	-	u	25.8175	4.69985	8.04128	5.98553	6.20911	0	0	0	6.34416	-3.03564	1.09132	-2.78162	0.00540877	0.999991
Down	NC_005117.4	-	3188028	3188023	3188051	LOC108348744	gene34159	gene34159	pseudogene	x	19.8596	12.7567	23.3928	8.37974	7.45093	4.64998	5.90415	0.76807	10.3953	-1.82778	0.657315	-2.78067	0.00542467	0.999991
Down	NC_005112.4	+	95079708	95079706	95079710	Akt3	rna52593	gene28737	protein_coding	x	154.905	18.128	55.5579	22.745	32.2874	6.64283	17.7124	13.0572	40.1295	-1.85036	0.668087	-2.76964	0.00561178	0.999991
Down	NC_005108.4	-	59786361	59786358	59786361	-	-	-	-	u	9.92982	2.68563	6.57923	2.39421	0	0.664283	0	0.76807	2.87766	-3.58125	1.29376	-2.76809	0.00563857	0.999991
Down	NC_005110.4	+	3208091	3208040	3208142	-	-	-	-	u	23.8316	9.39971	12.4274	11.9711	0	6.64283	4.92012	2.30421	8.93712	-1.92874	0.697406	-2.76558	0.00568211	0.999991
Down	NC_005114.4	+	97170805	97170788	97170940	-	-	-	-	u	21.8456	5.37126	4.38615	2.39421	2.48364	1.32857	0	0.76807	4.82219	-2.84995	1.03058	-2.76538	0.00568562	0.999991
Down	NC_005105.4	+	51425059	51425058	51425264	-	-	-	-	u	39.7193	17.4566	52.6338	22.745	11.1764	17.2713	12.7923	3.07228	22.1084	-1.57377	0.569288	-2.76446	0.00570171	0.999991
Down	NC_005100.4	-	249806592	249806571	249806592	Prkg1	rna8138	gene4522	protein_coding	i	3.97193	21.485	13.1585	1.19711	3.72547	0.664283	1.96805	0.76807	5.8673	-2.66036	0.962409	-2.76427	0.00570506	0.999991
Down	NC_005112.4	+	29866710	29866619	29866870	-	-	-	-	u	27.8035	4.02845	5.84821	4.78843	4.96729	0.664283	0.984025	0	6.13552	-2.7759	1.00484	-2.76253	0.00573544	0.999991
Down	NC_005108.4	+	7796335	7796321	7796378	Vom2r77	rna38876	gene21629	protein_coding	i	23.8316	4.69985	20.4687	11.9711	3.72547	4.64998	5.90415	1.53614	9.59837	-1.91934	0.694897	-2.76205	0.00574391	0.999991
Down	NC_005114.4	+	44499815	44499774	44499841	Dock5	rna56887	gene31173	protein_coding	i	29.7895	4.69985	32.8962	25.1392	13.66	3.9857	2.95207	0	14.1403	-2.22822	0.806876	-2.76154	0.0057529	0.999991
Down	NC_005110.4	+	22062712	22062703	22062736	-	-	-	-	u	47.6631	15.4424	14.6205	2.39421	7.45093	1.99285	3.9361	5.37649	12.3596	-2.08371	0.756227	-2.7554	0.005862	0.999991
Down	NC_005104.4	+	27093017	27093003	27093301	-	-	-	-	u	164.835	15.4424	20.4687	3.59132	14.9019	9.29996	4.92012	12.2891	30.7186	-2.28051	0.82782	-2.75483	0.00587221	0.999991
Down	NC_005113.4	+	65597941	65597939	65598055	Kcnip4	rna54349	gene29732	protein_coding	i	29.7895	3.35704	10.2344	3.59132	0	4.64998	0.984025	0	6.57577	-2.85979	1.03951	-2.7511	0.00593956	0.999991
Down	NC_005100.4	+	113090909	113090901	113090939	Gabrb3	rna3767	gene2136	protein_coding	i	1.98596	2.68563	5.84821	4.78843	0	0	0	0.76807	2.00954	-3.8626	1.40536	-2.74848	0.00598726	0.999991
Down	NC_005103.4	-	26464202	26464202	26464214	-	-	-	-	u	23.8316	1.34282	4.38615	2.39421	0	1.99285	0	0	4.24345	-3.65763	1.33349	-2.7429	0.00608987	0.999991
Down	NC_005100.4	+	49720332	49720275	49720454	Park2	rna868	gene555	protein_coding	i	3.97193	4.69985	21.9308	0	1.24182	1.32857	0	0	4.14662	-3.6235	1.32216	-2.7406	0.00613265	0.999991
Down	NC_005109.4	-	51418769	51418769	51418773	-	-	-	-	u	0	4.02845	2.9241	16.7595	0	0.664283	0	0.76807	3.14305	-3.7997	1.38771	-2.7381	0.00617951	0.999991
Down	NC_005100.4	-	249938347	249938346	249938357	Prkg1	rna8138	gene4522	protein_coding	i	5.95789	8.05689	10.9654	1.19711	0	0.664283	1.96805	0.76807	3.69721	-2.96019	1.08174	-2.73651	0.0062094	0.999991
Down	NC_005116.4	-	37700306	37700305	37700307	-	-	-	-	u	23.8316	5.37126	5.11718	7.18264	2.48364	3.32141	0.984025	0.76807	6.13248	-2.34189	0.856143	-2.73539	0.0062306	0.999991
Down	NC_005119.4	-	43049464	43049448	43049523	-	-	-	-	u	51.6351	10.7425	20.4687	22.745	13.66	4.64998	10.8243	3.84035	17.3207	-1.67815	0.613732	-2.73434	0.00625047	0.999991
Down	NC_005117.4	+	27103341	27103328	27103383	Apc	rna62620	gene34350	protein_coding	c	61.5649	48.3414	95.7644	55.0669	21.111	11.2928	35.4249	40.7077	46.1592	-1.2697	0.464903	-2.73111	0.00631222	0.999991
Down	NC_005100.4	-	221526213	221526213	221526216	-	-	-	-	u	73.4807	26.1849	35.0892	22.745	14.9019	9.29996	13.7763	21.506	27.123	-1.37166	0.502405	-2.73018	0.00632988	0.999991
Down	NC_005104.4	-	39583906	39583906	39583908	Fhl5	rna23707	gene13427	protein_coding	i	23.8316	12.0853	25.5859	14.3653	7.45093	9.29996	5.90415	1.53614	12.5074	-1.64071	0.601335	-2.72844	0.00636349	0.999991
Down	NC_005107.4	+	1903249	1903246	1903279	Gria4	rna34772	gene19473	protein_coding	i	23.8316	26.1849	24.1238	27.5334	17.3855	4.64998	3.9361	12.2891	17.4918	-1.45056	0.531999	-2.72662	0.00639865	0.999991
Down	NC_005105.4	-	102418273	102418272	102418276	Zfyve26	rna29227	gene16343	protein_coding	i	11.9158	18.7994	2.9241	2.39421	2.48364	1.32857	0.984025	1.53614	5.29574	-2.55166	0.936245	-2.72542	0.00642196	0.999991
Down	NC_005111.4	-	13969244	13969234	13969262	Wipi2	rna49275	gene27003	protein_coding	p	11.9158	7.38549	8.04128	9.57685	0	1.99285	4.92012	0.76807	5.57506	-2.21568	0.813086	-2.72502	0.0064297	0.999991
Down	NC_005103.4	+	74973234	74973230	74973244	Cntnap2	rna20244	gene11502	protein_coding	i	0	1.34282	18.2756	1.19711	1.24182	0	0	0	2.75717	-4.33531	1.59121	-2.72454	0.00643921	0.999991
Down	NC_005105.4	+	14038175	14038170	14038178	Nrxn1	rna27711	gene15468	protein_coding	i	9.92982	12.7567	17.5446	16.7595	7.45093	1.99285	6.88817	0.76807	9.26134	-1.84797	0.678345	-2.72424	0.00644506	0.999991
Down	NC_005104.4	+	7119471	7119438	7119639	RGD1564053	rna23257	gene13173	protein_coding	i	29.7895	8.05689	8.77231	4.78843	2.48364	4.64998	2.95207	0.76807	7.78261	-2.14525	0.789419	-2.71751	0.00657756	0.999991
Down	NC_005100.4	-	121736754	121736746	121736795	-	-	-	-	u	29.7895	1.34282	1.46205	4.78843	0	0	2.95207	0	5.04185	-3.65927	1.34793	-2.71473	0.00663297	0.999991
Down	NC_005100.4	+	28899023	28899016	28899392	-	-	-	-	u	43.6912	9.39971	18.2756	29.9277	12.4182	7.97139	8.85622	3.07228	16.7015	-1.6325	0.601584	-2.71366	0.00665443	0.999991
Down	NC_005116.4	-	23226879	23226879	23226880	-	-	-	-	u	85.3965	29.5419	44.5926	34.7161	24.8364	17.9356	24.6006	13.8253	34.4306	-1.24003	0.457821	-2.70854	0.00675795	0.999991
Down	NC_005104.4	+	80217317	80217295	80217354	-	-	-	-	u	15.8877	3.35704	18.2756	2.39421	2.48364	1.32857	2.95207	0.76807	5.93087	-2.44546	0.904433	-2.70386	0.00685389	0.999991
Down	NC_005101.4	+	52327015	52327011	52327060	Paip1	rna9816	gene5449	protein_coding	c	1.98596	1.34282	25.5859	1.19711	0	1.32857	0	0.76807	4.02605	-3.69957	1.3705	-2.69943	0.0069459	0.999991
Down	NC_005114.4	-	87095050	87095048	87095052	-	-	-	-	u	9.92982	11.4139	25.5859	2.39421	1.24182	3.32141	3.9361	3.07228	7.61193	-2.09599	0.776639	-2.6988	0.00695906	0.999991
Down	NC_005104.4	-	114156874	114156874	114156877	-	-	-	-	u	35.7474	2.01422	5.11718	5.98553	3.72547	0.664283	2.95207	0	7.02576	-2.76791	1.02596	-2.69789	0.00697812	0.999991
Down	NC_005118.4	+	53130357	53130354	53130380	RGD1304884	rna65409	gene35896	protein_coding	i	3.97193	2.68563	4.38615	3.59132	1.24182	0	0	0	1.98461	-3.75266	1.39159	-2.69668	0.00700352	0.999991
Down	NC_005101.4	+	241492412	241492411	241492520	Bank1	rna13259	gene7484	protein_coding	i	158.877	30.2133	62.1372	14.3653	34.771	11.2928	17.7124	1.53614	41.3632	-2.03225	0.754544	-2.69334	0.00707399	0.999991
Down	NC_005102.4	+	136743528	136743456	136743785	Kif16b	rna17313	gene9871	protein_coding	i	73.4807	24.8421	22.6618	16.7595	17.3855	9.29996	12.7923	9.21684	23.3048	-1.47666	0.548589	-2.69174	0.00710809	0.999991
Down	NC_005111.4	-	9504259	9504214	9504260	-	-	-	-	u	25.8175	9.39971	43.1305	8.37974	4.96729	11.9571	2.95207	3.07228	13.7095	-1.88517	0.700388	-2.69161	0.00711075	0.999991
Down	NC_005100.4	-	98304081	98304081	98304081	-	-	-	-	u	31.7754	2.68563	21.1997	9.57685	6.20911	5.31426	0.984025	0	9.71813	-2.37472	0.883657	-2.68738	0.00720156	0.999991
Down	NC_005100.4	-	122329417	122329416	122329434	-	-	-	-	u	21.8456	0	8.77231	2.39421	1.24182	0	0.984025	0.76807	4.50076	-3.50526	1.30441	-2.68725	0.0072043	0.999991
Down	NC_005101.4	+	111781188	111781187	111781277	Nlgn1	rna10421	gene5867	protein_coding	i	5.95789	6.04267	11.6964	4.78843	2.48364	0.664283	1.96805	0.76807	4.29618	-2.42151	0.901188	-2.68702	0.00720921	0.999991
Down	NC_005107.4	+	103735604	103735517	103735739	Atr	rna37500	gene21001	protein_coding	i	93.3403	44.9843	58.4821	25.1392	31.0456	19.2642	24.6006	19.9698	39.6033	-1.21868	0.454494	-2.68139	0.0073317	0.999991
Down	NC_005105.4	-	84072063	84072063	84072063	-	-	-	-	u	3.97193	6.04267	18.2756	3.59132	1.24182	1.99285	1.96805	0.76807	4.73154	-2.46679	0.920609	-2.67952	0.00737269	0.999991
Down	NC_005108.4	+	55127793	55127762	55127855	-	-	-	-	u	21.8456	19.4708	18.2756	1.19711	1.24182	5.97854	4.92012	1.53614	9.30823	-2.10956	0.789033	-2.6736	0.00750413	0.999991
Down	NC_005109.4	-	93749734	93749717	93749735	-	-	-	-	u	5.95789	1.34282	45.3236	0	2.48364	1.32857	1.96805	0.76807	7.39658	-3.07917	1.15172	-2.67354	0.00750561	0.999991
Down	NC_005109.4	-	65138113	65138113	65138113	-	-	-	-	u	75.4666	9.39971	16.0826	7.18264	8.69276	9.96424	1.96805	0	16.0946	-2.35788	0.882664	-2.67132	0.00755536	0.999991
Down	NC_005115.4	-	28714188	28714188	28714188	Spock3	rna58882	gene32209	protein_coding	i	25.8175	2.01422	4.38615	1.19711	0	1.99285	0	0.76807	4.52199	-3.3009	1.2363	-2.66998	0.00758554	0.999991
Down	NC_005112.4	-	93097227	93097227	93097251	Rgs7	rna52563	gene28716	protein_coding	i	3.97193	11.4139	5.84821	1.19711	0	0.664283	0.984025	0.76807	3.10594	-3.19793	1.19821	-2.66892	0.00760958	0.999991
Down	NC_005108.4	+	76751322	76751268	76751376	Ikzf2	rna40569	gene22446	protein_coding	i	0	2.01422	13.1585	2.39421	0	0	0	0.76807	2.29187	-4.10075	1.53713	-2.66779	0.00763514	0.999991
Down	NC_005105.4	+	121505121	121505118	121505156	LOC102550062	rna29631	gene16594	lncRNA	i	23.8316	9.39971	10.9654	9.57685	8.69276	2.65713	1.96805	0	8.38643	-2.07952	0.779506	-2.66774	0.00763632	0.999991
Down	NC_005120.4	+	73500180	73500157	73500203	Fam9b	rna68743	gene37998	protein_coding	i	9.92982	0.671408	5.84821	1.19711	1.24182	0	0	0	2.36105	-3.9511	1.48141	-2.66712	0.00765044	0.999991
Down	NC_005112.4	+	79015685	79015681	79015708	Slc9c2	rna51968	gene28393	protein_coding	i	63.5508	8.7283	16.0826	5.98553	8.69276	5.31426	5.90415	0	14.2823	-2.23562	0.838375	-2.66661	0.00766211	0.999991
Down	NC_005102.4	-	112309234	112309203	112309237	Zfp106	rna16648	gene9529	protein_coding	c	5.95789	0.671408	35.0892	2.39421	0	1.99285	1.96805	1.53614	6.20122	-2.96789	1.1137	-2.6649	0.00770108	0.999991
Down	NC_005112.4	+	64630020	64630019	64630087	-	-	-	-	u	17.8737	7.38549	10.9654	2.39421	1.24182	1.99285	3.9361	0.76807	5.8197	-2.24781	0.844108	-2.66295	0.00774597	0.999991
Down	NC_005102.4	-	12219652	12219649	12219655	Ralgps1	rna14523	gene8069	protein_coding	i	0	1.34282	8.04128	3.59132	0	0	0	0	1.62193	-4.3743	1.64373	-2.6612	0.00778637	0.999991
Down	NC_005112.4	-	97000128	97000128	97000128	Kif26b	rna52626	gene28758	protein_coding	i	11.9158	1.34282	6.57923	4.78843	1.24182	0.664283	0.984025	0	3.43955	-3.11912	1.17387	-2.65713	0.00788089	0.999991
Down	NC_005100.4	-	101822637	101822637	101822642	Grin2d	rna3572	gene2019	protein_coding	c	1.98596	0	12.4274	1.19711	0	0	0	0	1.95131	-4.6146	1.73984	-2.65231	0.00799419	0.999991
Down	NC_005107.4	-	100640978	100640978	100640980	-	-	-	-	u	19.8596	7.38549	8.77231	8.37974	3.72547	1.99285	4.92012	0	6.87945	-2.08113	0.784883	-2.65152	0.00801313	0.999991
Down	NC_005101.4	-	133791549	133791549	133791552	-	-	-	-	u	21.8456	2.01422	8.04128	3.59132	1.24182	1.99285	1.96805	0	5.08689	-2.68316	1.01198	-2.6514	0.00801595	0.999991
Down	NC_005112.4	+	98896240	98896221	98896604	-	-	-	-	u	419.038	167.852	278.521	135.273	147.777	82.3711	107.259	129.036	183.391	-1.0981	0.414176	-2.65128	0.00801865	0.999991
Down	NC_005118.4	+	37796320	37796303	37796354	Tsnaxip1	rna64982	gene35689	protein_coding	i	5.95789	7.38549	12.4274	4.78843	2.48364	0.664283	2.95207	0.76807	4.67841	-2.29834	0.867377	-2.64976	0.00805497	0.999991
Down	NC_005105.4	+	31238641	31238610	31238873	-	-	-	-	u	180.723	60.4267	67.9854	64.6437	27.3201	33.2141	65.9297	13.0572	64.1625	-1.41018	0.532985	-2.64582	0.0081494	0.999991
Down	NC_005102.4	-	115633886	115633886	115633886	-	-	-	-	u	11.9158	7.38549	6.57923	1.19711	0	0	0.984025	2.30421	3.79573	-2.9492	1.11486	-2.64535	0.00816055	0.999991
Down	NC_005102.4	-	93821297	93821294	93821300	-	-	-	-	u	95.3263	40.2845	70.1785	32.3219	27.3201	35.207	22.6326	16.8975	42.521	-1.20281	0.45478	-2.64483	0.0081733	0.999991
Down	NC_005113.4	-	85474441	85474438	85474447	Kremen1	rna54996	gene29988	protein_coding	i	43.6912	20.8136	18.2756	40.7016	16.1437	5.97854	17.7124	6.14456	21.1827	-1.43242	0.54176	-2.64402	0.00819284	0.999991
Down	NC_005115.4	-	23763554	23763554	23763558	Psd3	rna58808	gene32167	protein_coding	i	17.8737	2.68563	4.38615	7.18264	1.24182	0	2.95207	0.76807	4.63626	-2.70106	1.0218	-2.64344	0.00820688	0.999991
Down	NC_005106.4	+	124845955	124845953	124845955	Efcab6	rna33829	gene19011	protein_coding	i	11.9158	1.34282	4.38615	7.18264	1.24182	0	0.984025	0.76807	3.47766	-3.09334	1.17327	-2.63651	0.00837649	0.999991
Down	NC_005110.4	+	43024547	43024462	43024629	Mina	rna47493	gene26003	protein_coding	i	9.92982	2.01422	13.1585	1.19711	0	1.99285	0	0	3.53656	-3.45651	1.31129	-2.63596	0.00839007	0.999991
Down	NC_005108.4	+	38962280	38962271	38962337	LOC689966	gene22068	gene22068	pseudogene	o	1.98596	7.38549	5.11718	8.37974	0	0.664283	0.984025	1.53614	3.2566	-2.80165	1.06306	-2.63547	0.00840212	0.999991
Down	NC_005106.4	-	52250859	52250859	52250859	Nav3	rna32034	gene18117	protein_coding	i	17.8737	6.71408	10.9654	2.39421	3.72547	2.65713	0.984025	0	5.66425	-2.37766	0.902883	-2.63341	0.00845324	0.999991
Down	NC_005100.4	-	131199511	131199511	131199511	-	-	-	-	u	27.8035	6.71408	20.4687	5.98553	2.48364	6.64283	4.92012	0.76807	9.47331	-1.97758	0.751388	-2.6319	0.00849087	0.999991
Down	NC_005114.4	+	57363948	57363944	57363981	Zc3h13	rna57249	gene31357	protein_coding	i	5.95789	8.05689	10.9654	8.37974	1.24182	1.99285	1.96805	3.07228	5.20436	-2.00199	0.761291	-2.62974	0.00854512	0.999991
Down	NC_005119.4	-	44217850	44217850	44217850	Fam229b	rna67359	gene37077	protein_coding	i	5.95789	0.671408	16.0826	1.19711	1.24182	0	0.984025	0	3.26685	-3.7134	1.41353	-2.62704	0.00861324	0.999991
Down	NC_005107.4	+	7462818	7462815	7462870	-	-	-	-	u	123.13	20.8136	27.0479	19.1537	22.3528	15.2785	11.8083	1.53614	30.1401	-1.88811	0.719462	-2.62433	0.00868186	0.999991
Down	NC_005102.4	-	112304130	112304128	112304131	Zfp106	rna16648	gene9529	protein_coding	c	1.98596	0.671408	12.4274	0	0	0	0	0	1.8856	-4.57204	1.7435	-2.62234	0.00873291	0.999991
Down	NC_005106.4	-	11305302	11305286	11305313	Tjp3	rna30962	gene17495	protein_coding	i	69.5087	4.69985	4.38615	4.78843	1.24182	7.30711	3.9361	1.53614	12.1755	-2.47034	0.943083	-2.61943	0.00880769	0.999991
Down	NC_005100.4	-	184232298	184232298	184232310	-	-	-	-	u	17.8737	4.02845	8.04128	8.37974	1.24182	3.9857	1.96805	0	5.68984	-2.28663	0.87339	-2.61811	0.00884175	0.999991
Down	NC_005107.4	+	48727710	48727704	48727713	Rps25	rna35954	gene20254	protein_coding	c	13.9017	9.39971	24.1238	16.7595	4.96729	0	9.84025	2.30421	10.1621	-1.98138	0.756819	-2.61804	0.00884358	0.999991
Down	NC_005109.4	+	65192786	65192780	65192806	Nufip2	rna44502	gene24449	protein_coding	i	21.8456	27.5277	27.0479	11.9711	7.45093	5.31426	9.84025	12.2891	15.4109	-1.36018	0.519564	-2.61792	0.00884673	0.999991
Down	NC_005120.4	-	74947650	74947626	74947665	RGD1561931	rna68792	gene38043	protein_coding	c	7.94386	4.02845	4.38615	2.39421	0	0.664283	0	0.76807	2.52313	-3.38702	1.29468	-2.61611	0.00889387	0.999991
Down	NC_005101.4	-	3506882	3506882	3506882	Mctp1	rna9155	gene5023	protein_coding	i	47.6631	2.68563	1.46205	0	0	0.664283	1.96805	2.30421	7.09342	-3.28322	1.2572	-2.61154	0.00901356	0.999991
Down	NC_005102.4	+	160442446	160442443	160442626	Pabpc1l	rna18239	gene10338	protein_coding	i	5.95789	4.02845	22.6618	8.37974	4.96729	2.65713	0.984025	0.76807	6.30055	-2.22729	0.853065	-2.61092	0.00902987	0.999991
Down	NC_005110.4	+	25994811	25994802	25994934	-	-	-	-	u	3.97193	12.7567	27.779	2.39421	0	4.64998	1.96805	2.30421	6.97801	-2.35357	0.90186	-2.60968	0.00906269	0.999991
Down	NC_005101.4	+	216195163	216195094	216195288	-	-	-	-	u	5.95789	12.0853	82.6059	16.7595	3.72547	10.6285	7.8722	9.21684	18.6065	-1.90663	0.730656	-2.60948	0.00906789	0.999991
Down	NC_005109.4	-	66706178	66706171	66706186	-	-	-	-	u	91.3543	15.4424	27.779	19.1537	14.9019	11.2928	13.7763	12.2891	25.7487	-1.51675	0.58126	-2.60941	0.00906973	0.999991
Down	NC_005118.4	-	24705480	24705476	24705480	Tecr	rna64408	gene35404	protein_coding	c	355.488	74.5263	105.999	92.1772	100.588	65.764	24.6006	26.8824	105.753	-1.52296	0.583655	-2.60934	0.00907159	0.999991
Down	NC_005104.4	-	86131210	86131207	86131210	-	-	-	-	u	85.3965	21.485	23.3928	15.5624	21.111	8.63567	5.90415	0	22.6859	-2.04398	0.783355	-2.60926	0.00907374	0.999991
Down	NC_005102.4	+	44556811	44556805	44556841	LOC102555913	rna15027	gene8450	lncRNA	p	23.8316	2.68563	13.8895	9.57685	3.72547	3.32141	2.95207	2.30421	7.78584	-1.9671	0.754466	-2.60728	0.00912649	0.999991
Down	NC_005104.4	-	18452260	18452258	18452263	LOC103692308	gene13257	gene13257	pseudogene	i	31.7754	8.05689	14.6205	8.37974	1.24182	0.664283	0	9.98491	9.34045	-2.31247	0.887489	-2.60564	0.00917037	0.999991
Down	NC_005102.4	+	8991044	8991007	8991052	Ptpa	rna14361	gene7986	protein_coding	c	3.97193	0.671408	9.50333	5.98553	0	0.664283	0.984025	0	2.72256	-3.53104	1.35519	-2.60557	0.00917223	0.999991
Down	NC_005101.4	-	16606152	16606152	16606152	-	-	-	-	u	19.8596	3.35704	21.9308	8.37974	1.24182	7.30711	0.984025	0	7.88252	-2.38431	0.915546	-2.60425	0.00920765	0.999991
Down	NC_005120.4	+	92111188	92111185	92111200	-	-	-	-	u	13.9017	1.34282	2.9241	3.59132	0	0.664283	0.984025	0	2.92604	-3.50325	1.34545	-2.60377	0.00922037	0.999991
Down	NC_005120.4	+	146265427	146265427	146265524	-	-	-	-	u	9.92982	2.01422	4.38615	3.59132	1.24182	0	0	0.76807	2.74143	-3.38723	1.3019	-2.60177	0.00927443	0.999991
Down	NC_005111.4	+	23009256	23009255	23009269	-	-	-	-	u	19.8596	4.69985	5.84821	7.18264	2.48364	0	1.96805	3.07228	5.63929	-2.29131	0.881982	-2.59791	0.00937919	0.999991
Down	NC_005113.4	+	43484176	43484147	43484176	Apbb2	rna54147	gene29576	protein_coding	i	5.95789	4.02845	18.2756	26.3363	4.96729	4.64998	2.95207	0	8.39596	-2.15498	0.829944	-2.59654	0.00941692	0.999991
Down	NC_005113.4	+	64092390	64092386	64092428	-	-	-	-	u	43.6912	0.671408	3.65513	1.19711	3.72547	1.32857	0	0	6.78361	-3.31754	1.27804	-2.59582	0.00943668	0.999991
Down	NC_005105.4	-	15190957	15190953	15190960	Nrxn1	rna27711	gene15468	protein_coding	c	9.92982	4.02845	2.9241	0	0	0	0.984025	0	2.2333	-3.89302	1.50048	-2.59452	0.00947224	0.999991
Down	NC_005115.4	+	7583308	7583308	7583402	Mettl6	rna58127	gene31840	protein_coding	i	27.8035	1.34282	1.46205	1.19711	0	1.32857	0.984025	0	4.26476	-3.56947	1.37658	-2.593	0.0095144	0.999991
Down	NC_005120.4	-	120808819	120808804	120808820	-	-	-	-	u	19.8596	6.04267	8.04128	8.37974	2.48364	3.32141	3.9361	0	6.50806	-2.06805	0.797971	-2.59164	0.00955199	0.999991
Down	NC_005119.4	+	39911269	39911241	39911435	-	-	-	-	u	9.92982	10.0711	7.31026	8.37974	3.72547	2.65713	1.96805	1.53614	5.69722	-1.88063	0.726137	-2.58991	0.00960006	0.999991
Down	NC_005103.4	-	183235107	183235073	183235126	LOC686774	rna23103	gene13058	protein_coding	e	1.98596	0	19.7377	3.59132	1.24182	0	0	0.76807	3.41561	-3.85652	1.49004	-2.5882	0.00964794	0.999991
Down	NC_005116.4	-	13322570	13322567	13322570	-	-	-	-	u	7.94386	2.01422	4.38615	4.78843	0	0	0.984025	0.76807	2.61059	-3.34911	1.29475	-2.58668	0.00969044	0.999991
Down	NC_005101.4	-	190808842	190808842	190808842	-	-	-	-	u	7.94386	1.34282	7.31026	5.98553	0	1.32857	0.984025	0	3.11188	-3.12416	1.20799	-2.58625	0.00970267	0.999991
Down	NC_005104.4	-	80765147	80765143	80765176	-	-	-	-	u	41.7052	9.39971	17.5446	4.78843	0	6.64283	6.88817	3.84035	11.3512	-1.98324	0.767689	-2.58339	0.00978347	0.999991
Down	NC_005115.4	-	33368519	33368519	33368520	-	-	-	-	u	3.97193	8.05689	5.84821	5.98553	1.24182	1.99285	0	0.76807	3.48316	-2.54621	0.988149	-2.57675	0.00997346	0.999991
Down	NC_005105.4	+	37496816	37496810	37496858	-	-	-	-	u	1.98596	2.68563	14.6205	11.9711	0	0.664283	3.9361	0	4.48294	-2.83169	1.0992	-2.57614	0.00999106	0.999991
UP	NC_005114.4	-	77467627	77467622	77467641	Pcdh9	rna57426	gene31463	protein_coding	i	11.9158	14.771	4.38615	22.745	83.2021	57.1283	63.9616	46.8523	38.1203	2.23976	0.485923	4.60929	4.04049e-06	0.0990738
Up	NC_005109.4	+	67771276	67771266	67771557	Zfp207	rna44634	gene24531	protein_coding	i	0	4.02845	5.11718	5.98553	14.9019	20.5928	21.6485	23.8102	12.0106	2.29664	0.590538	3.88907	0.000100631	0.986995
UP	NC_005109.4	-	57013328	57013324	57013341	-	-	-	-	u	7.94386	1.34282	2.9241	0	52.1565	9.96424	13.7763	10.753	12.3576	3.01126	0.828784	3.63334	0.000279774	0.999991
UP	NC_005113.4	-	17097332	17097331	17097337	Scarb2	rna53628	gene29288	protein_coding	i	1.98596	0	0.731026	1.19711	16.1437	8.63567	1.96805	15.3614	5.75286	3.76694	1.08464	3.47299	0.000514701	0.999991
Up	NC_005107.4	-	23277746	23277743	23277761	Zfp717	rna35317	gene19831	protein_coding	c	1.98596	0	0.731026	0	3.72547	5.31426	12.7923	11.521	4.50876	4.0374	1.17356	3.44031	0.000581046	0.999991
UP	NC_005112.4	-	90653572	90653563	90653577	Atp1a2	rna52438	gene28633	protein_coding	c	1.98596	0	0	0	3.72547	1.99285	3.9361	21.506	4.14329	4.64107	1.37916	3.36513	0.00076507	0.999991
Up	NC_005104.4	-	153678578	153678535	153678578	Srrm1	rna26334	gene14841	protein_coding	i	1.98596	0	0	0	19.8692	3.9857	0.984025	6.14456	4.12118	4.58724	1.37722	3.3308	0.000865976	0.999991
Up	NC_005103.4	+	157487597	157487589	157487604	-	-	-	-	u	1.98596	1.34282	0.731026	0	12.4182	12.6214	6.88817	4.60842	5.0745	3.25505	0.9852	3.30395	0.000953345	0.999991
Up	NC_005111.4	+	11839169	11839157	11839210	Tmem130	rna49190	gene26951	protein_coding	c	1.98596	0.671408	6.57923	3.59132	18.6273	7.30711	28.5367	16.1295	10.4286	2.40497	0.730566	3.29192	0.000995052	0.999991
Up	NC_005102.4	-	123117480	123117467	123117504	Avp	rna17062	gene9743	protein_coding	o	2494.37	1054.11	3082	1177.95	5799.31	3278.24	4343.49	6313.53	3442.88	1.33779	0.418933	3.19332	0.00140647	0.999991
UP	NC_005107.4	-	30039507	30039488	30039509	Ntm	rna35408	gene19877	protein_coding	c	0	0.671408	2.19308	1.19711	6.20911	3.9857	3.9361	32.2589	6.30643	3.3579	1.055	3.18284	0.00145836	0.999991
UP	NC_005115.4	-	38620539	38620535	38620560	-	-	-	-	u	0	3.35704	4.38615	1.19711	19.8692	5.97854	12.7923	15.3614	7.86772	2.34784	0.751697	3.12339	0.00178781	0.999991
UP	NC_005120.4	-	55431496	55431493	55431499	-	-	-	-	u	1.98596	0	0	0	0	5.31426	13.7763	5.37649	3.30663	4.28822	1.4268	3.00548	0.00265161	0.999991
Up	NC_005113.4	-	10970591	10970591	10970592	LOC108352711	rna53511	gene29208	lncRNA	i	0	0	0	0	1.24182	1.99285	15.7444	0.76807	2.46839	4.68057	1.56688	2.9872	0.00281548	0.999991
Up	NC_005103.4	-	179260286	179260261	179260295	Bcat1	rna22988	gene12999	protein_coding	c	0	0.671408	0	0	3.72547	20.5928	0.984025	0.76807	3.34272	4.39698	1.5012	2.92898	0.00340079	0.999991
Up	NC_005113.4	+	100360519	100360515	100360660	Ppp3r1	rna55281	gene30119	protein_coding	c	13.9017	6.04267	4.38615	8.37974	4.96729	19.2642	17.7124	105.226	22.485	2.2415	0.767418	2.92084	0.00349094	0.999991
Up	NC_005107.4	+	75405153	75405152	75405232	-	-	-	-	u	0	2.01422	1.46205	0	7.45093	3.9857	7.8722	13.0572	4.48029	2.87894	0.985702	2.9207	0.00349242	0.999991
UP	NC_005117.4	-	40579579	40579576	40579583	Tmed7	rna62990	gene34585	protein_coding	c	5.95789	4.69985	4.38615	5.98553	19.8692	15.9428	15.7444	12.2891	10.6094	1.63197	0.560371	2.91229	0.00358784	0.999991
UP	NC_005103.4	-	183096204	183096204	183096211	-	-	-	-	u	0	0	0.731026	0	7.45093	1.99285	5.90415	3.84035	2.48991	3.89422	1.35131	2.88182	0.00395381	0.999991
Up	NC_005113.4	+	78524456	78524456	78524464	-	-	-	-	u	1.98596	0	0	0	19.8692	4.64998	1.96805	0	3.55914	4.35855	1.53222	2.8446	0.00444678	0.999991
UP	NC_005100.4	-	29506664	29506655	29506664	Trmt11	rna490	gene329	protein_coding	i	3.97193	1.34282	0.731026	3.59132	8.69276	11.9571	6.88817	10.753	5.99101	2.21812	0.783337	2.83163	0.00463112	0.999991
UP	NC_005103.4	+	114892423	114892418	114892623	Dctn1	rna21049	gene12025	protein_coding	e	1.98596	2.68563	10.2344	2.39421	2.48364	30.557	55.1054	7.6807	14.1409	2.39655	0.848397	2.8248	0.00473107	0.999991
UP	NC_005104.4	+	34360845	34360840	34361169	Nkain3	rna23661	gene13396	protein_coding	i	1.98596	6.71408	11.6964	4.78843	2.48364	25.2427	27.5527	56.0691	17.0666	2.07594	0.735171	2.82375	0.0047465	0.999991
Up	NC_005103.4	+	157637958	157637929	157638074	Chd4	rna22270	gene12617	protein_coding	o	0	3.35704	3.65513	2.39421	2.48364	9.96424	3.9361	47.6203	9.17634	2.64377	0.943678	2.80156	0.00508565	0.999991
Up	NC_005107.4	-	8128228	8128226	8128228	LOC103690239	rna34874	gene19555	lncRNA	x	0	4.02845	7.31026	1.19711	7.45093	13.2857	10.8243	29.9547	9.25642	2.11636	0.756512	2.79752	0.00514967	0.999991
UP	NC_005101.4	-	235736464	235736461	235736464	-	-	-	-	u	7.94386	12.0853	13.8895	26.3363	39.7383	27.2356	43.2971	36.8673	25.9242	1.26826	0.453647	2.79569	0.00517884	0.999991
Up	NC_005100.4	-	185916203	185916203	185916208	Sox6	rna5565	gene3220	protein_coding	i	1.98596	3.35704	2.19308	2.39421	12.4182	12.6214	6.88817	9.21684	6.38436	2	0.71617	2.79263	0.0052281	0.999991
UP	NC_005106.4	-	70533130	70533105	70533153	Kif5a	rna32378	gene18316	protein_coding	c	3.97193	7.38549	18.2756	8.37974	2.48364	13.2857	60.0255	110.602	28.0512	2.25879	0.809588	2.79005	0.00526996	0.999991
UP	NC_005110.4	-	66842208	66842205	66842209	Iqcb1	rna47969	gene26285	protein_coding	i	0	0	0	0	2.48364	4.64998	1.96805	3.84035	1.61775	4.10237	1.47524	2.78081	0.00542238	0.999991
Up	NC_005101.4	-	250218946	250218940	250218953	Lmo4	rna13403	gene7564	protein_coding	c	0	3.35704	0.731026	1.19711	2.48364	6.64283	33.4568	3.07228	6.3676	2.91238	1.05032	2.77285	0.00555686	0.999991
UP	NC_005101.4	+	184680301	184680287	184680410	Gatb	rna11445	gene6507	protein_coding	p	3.97193	5.37126	1.46205	9.57685	12.4182	29.8927	17.7124	9.98491	11.2988	1.82349	0.659833	2.76356	0.0057174	0.999991
UP	NC_005113.4	-	22978403	22978400	22978423	Ythdc1	rna53828	gene29400	protein_coding	i	1.98596	1.34282	0.731026	0	8.69276	2.65713	7.8722	8.44877	3.96633	2.83849	1.02789	2.76147	0.00575421	0.999991
UP	NC_005117.4	-	81403531	81403527	81403531	Zfp407	rna63787	gene35046	protein_coding	i	19.8596	9.39971	13.1585	3.59132	38.4965	23.2499	36.4089	21.506	20.7088	1.42088	0.515158	2.75814	0.00581312	0.999991
Up	NC_005103.4	+	58511802	58511798	58511876	LOC103690249	rna19905	gene11269	lncRNA	i	1.98596	1.34282	0.731026	3.59132	12.4182	15.2785	3.9361	5.37649	5.58255	2.38939	0.868544	2.75103	0.00594077	0.999991
UP	NC_005108.4	-	9855783	9855780	9855787	-	-	-	-	u	15.8877	10.7425	6.57923	4.78843	26.0783	26.5713	19.6805	21.506	16.4792	1.36916	0.499243	2.74248	0.00609776	0.999991
UP	NC_005120.4	-	64393617	64393609	64393618	Arhgef9	rna68532	gene37862	protein_coding	i	0	0	0	0	2.48364	13.2857	0	1.53614	2.16318	4.53012	1.65328	2.74008	0.0061425	0.999991
Up	NC_005117.4	+	50001186	50001183	50001274	LOC108348794	rna63101	gene34664	lncRNA	i	1.98596	0	0	0	1.24182	7.30711	3.9361	4.60842	2.38493	3.79694	1.38638	2.73874	0.00616742	0.999991
Up	NC_005102.4	-	78438071	78438071	78438071	-	-	-	-	u	0	0	0	0	1.24182	1.99285	1.96805	8.44877	1.70644	4.18252	1.54083	2.71445	0.00663854	0.999991
UP	NC_005118.4	+	7937211	7937188	7937371	-	-	-	-	u	5.95789	3.35704	5.84821	2.39421	9.93458	8.63567	11.8083	30.7228	9.83234	1.83493	0.676724	2.71149	0.00669819	0.999991
Up	NC_005103.4	+	174224724	174224699	174224820	-	-	-	-	u	0	0.671408	2.19308	3.59132	2.48364	3.9857	6.88817	29.9547	6.221	2.70562	0.999785	2.7062	0.00680578	0.999991
Up	NC_005106.4	-	74235087	74235085	74235088	Vps13b	rna32516	gene18382	protein_coding	i	1.98596	10.7425	10.2344	28.7306	60.8493	15.9428	43.2971	42.2438	26.7533	1.61616	0.5989	2.69855	0.00696419	0.999991
Up	NC_005114.4	+	11233492	11233394	11233855	Lrrc3b	rna55795	gene30405	protein_coding	i	5.95789	20.8136	12.4274	16.7595	37.2547	35.8713	22.6326	42.2438	24.2451	1.24478	0.463044	2.68826	0.00718248	0.999991
Up	NC_005101.4	+	62992071	62992064	62992161	Drosha	rna10040	gene5595	protein_coding	i	5.95789	4.02845	4.38615	8.37974	21.111	13.9499	12.7923	15.3614	10.7459	1.51869	0.566465	2.68099	0.00734051	0.999991
Up	NC_005105.4	+	38646943	38646931	38647034	Nbas	rna28171	gene15737	protein_coding	i	11.9158	5.37126	10.9654	11.9711	50.9147	19.9285	18.6965	19.2017	18.6206	1.45346	0.542251	2.68042	0.00735292	0.999991
Up	NC_005113.4	+	83528894	83528882	83528947	Patz1	rna54848	gene29932	protein_coding	o	5.95789	22.1565	13.1585	15.5624	53.3984	42.5141	25.5846	25.3463	25.4598	1.30244	0.485924	2.68033	0.00735493	0.999991
Up	NC_005102.4	+	140421639	140421635	140421642	Cfap61	rna17407	gene9911	protein_coding	c	1.98596	0	0	0	4.96729	2.65713	2.95207	5.37649	2.24237	3.65222	1.36771	2.67032	0.00757801	0.999991
Up	NC_005119.4	-	29857103	29857074	29857108	Cdh23	rna67121	gene36927	protein_coding	c	1.98596	0.671408	2.19308	2.39421	4.96729	9.96424	6.88817	9.98491	4.88116	2.23081	0.837543	2.66351	0.00773298	0.999991
Up	NC_005106.4	-	12875536	12875514	12875560	Bsg	rna31228	gene17601	protein_coding	o	204.554	222.907	241.969	369.906	476.86	236.485	847.246	696.639	412.071	1.11807	0.420171	2.66098	0.00779136	0.999991
UP	NC_001665.2	-	14130	14126	14260	Trne	rna70615	gene39533	tRNA	o	29.7895	22.8279	19.7377	15.5624	80.7185	49.1569	21.6485	53.7649	36.6508	1.23753	0.465289	2.65969	0.00782118	0.999991
UP	NC_005107.4	-	124831047	124831047	124831051	-	-	-	-	u	0	0	0	0	8.69276	6.64283	0	0.76807	2.01296	4.38355	1.65379	2.65061	0.00803462	0.999991
UP	NC_005110.4	-	84621462	84621460	84621463	Klhl24	rna48521	gene26578	protein_coding	i	1.98596	0.671408	1.46205	0	7.45093	7.30711	3.9361	6.14456	3.61977	2.69425	1.01673	2.6499	0.00805151	0.999991
UP	NC_005110.4	-	26088391	26088391	26088393	-	-	-	-	u	0	0.671408	0.731026	0	3.72547	5.31426	0.984025	10.753	2.7724	3.43144	1.30078	2.63798	0.00834013	0.999991
UP	NC_005115.4	-	35952071	35952067	35952071	Galnt7	rna58940	gene32254	protein_coding	i	0	0	0	0	1.24182	5.97854	1.96805	3.07228	1.53259	4.0399	1.53208	2.63687	0.00836747	0.999991
UP	NC_005102.4	+	123107529	123107465	123107803	Oxt	rna17061	gene9742	protein_coding	o	421.024	701.621	888.927	371.103	870.518	1673.99	1161.15	1064.54	894.11	0.999448	0.379411	2.63421	0.00843327	0.999991
Up	NC_005105.4	-	21870729	21870728	21870745	Ttc27	rna27749	gene15510	protein_coding	i	1.98596	14.0996	12.4274	19.1537	52.1565	19.9285	34.4409	25.3463	22.4424	1.39334	0.533391	2.61223	0.00899548	0.999991
Up	NC_005120.4	+	136225195	136225173	136225240	Enox2	rna69571	gene38635	protein_coding	i	0	0	0.731026	1.19711	1.24182	9.29996	1.96805	8.44877	2.86084	3.3908	1.29821	2.6119	0.00900403	0.999991
UP	NC_005112.4	+	7373552	7373548	7373990	Cntnap5c	rna50797	gene27780	protein_coding	i	0	20.8136	10.2344	13.1682	50.9147	27.8999	29.5207	24.5782	22.1412	1.48448	0.570107	2.60385	0.00921819	0.999991
UP	NC_005116.4	-	42165053	42165044	42165061	RGD1307443	rna61093	gene33459	protein_coding	c	3.97193	12.7567	5.11718	7.18264	37.2547	25.907	7.8722	19.9698	15.004	1.57741	0.606301	2.60169	0.00927646	0.999991
UP	NC_005104.4	-	20030729	20030726	20030729	Tox	rna23452	gene13273	protein_coding	i	0	0.671408	0.731026	1.19711	4.96729	5.31426	3.9361	6.91263	2.96623	2.88531	1.10902	2.60168	0.00927681	0.999991
Up	NC_005101.4	-	103923989	103923988	103923990	-	-	-	-	u	0	0	0	0	1.24182	7.30711	0.984025	3.07228	1.57565	4.08458	1.57198	2.59837	0.0093668	0.999991
UP	NC_005102.4	+	113266351	113266322	113266417	Map1a	rna16707	gene9554	protein_coding	c	3.97193	1.34282	8.77231	4.78843	0	4.64998	60.0255	43.0119	15.8204	2.50484	0.965045	2.59557	0.0094434	0.999991
Up	NC_005106.4	-	132294349	132294347	132294360	Abcd2	rna34084	gene19120	protein_coding	p	0	6.71408	3.65513	1.19711	13.66	13.2857	10.8243	10.753	7.51116	1.83447	0.707079	2.59444	0.0094745	0.999991
Up	NC_005112.4	+	47952116	47952104	47952158	Eif2d	rna51137	gene28013	protein_coding	i	1.98596	4.02845	2.19308	4.78843	11.1764	15.9428	10.8243	6.91263	7.2315	1.76153	0.681992	2.58292	0.00979683	0.999991
Up	NC_005104.4	+	25797773	25797771	25797781	-	-	-	-	u	0	0	0.731026	0	6.20911	3.9857	0.984025	4.60842	2.06478	3.63795	1.41015	2.57983	0.00988482	0.999991
UP	NC_005103.4	+	178398915	178398908	178398922	Sox5	rna22978	gene12994	protein_coding	i	0	0	0.731026	0	2.48364	1.32857	5.90415	6.14456	2.07399	3.65188	1.41578	2.57941	0.00989681	0.999991
UP	NC_005111.4	-	43421319	43421314	43421335	Med13l	rna50344	gene27561	protein_coding	c	7.94386	30.2133	14.6205	20.3508	24.8364	52.4783	33.4568	74.5028	32.3004	1.30571	0.506532	2.57774	0.00994487	0.999991
